# Supplementary material for: Enantioselective aza-Friedel–Crafts alkylation of aniline derivatives with cyclic N-sulfonyl α-ketiminoesters: the effect of catalyst confinement and the rationale behind the high enantioselectivity
Source: Royal Society of Chemistry journal article supplement (doi:10.1039/d4qo01076k), 2024-01-01
Supplement: d4qo01076k1.pdf [file d4qo01076k1.pdf]

## Electronic Supplementary Information

### **Enantioselective aza-Friedel-Crafts Alkylation of Aniline Derivatives with Cyclic N-Sulfonyl $\alpha$ -Ketiminoesters: The Effect of Catalyst Confinement and The Rationale Behind the High Enantioselectivity**

Jiahui Li,<sup>#</sup> Shibo Yu,<sup>#</sup> Lei He, Tianxu Yu, Leipeng Xue, Chao Yao\* and Yue-Ming Li\*

State Key Laboratory of Medicinal Chemical Biology, College of Pharmacy and Tianjin Key Laboratory of Molecular Drug Research Nankai University, Tianjin, 300350, China

E-mail: 9820210051@nankai.edu.cn; ymli@nankai.edu.cn

<sup>#</sup> These authors contributed equally to the work.

## CONTENTS

|                                                                                                                                            |      |
|--------------------------------------------------------------------------------------------------------------------------------------------|------|
| 1. Experimental Section.....                                                                                                               | S1   |
| 1.1. General Information .....                                                                                                             | S1   |
| 1.2. Optimization of Reaction Conditions.....                                                                                              | S1   |
| 1.3. General Procedures for Enantioselective aza-Friedel-Crafts Reaction of Anilines with Cyclic N-Sulfonyl $\alpha$ -Ketiminoesters ..... | S3   |
| 1.4. Transformation of Product <b>3</b> .....                                                                                              | S4   |
| 2. Preparation of Cyclic N-Sulfonyl $\alpha$ -Ketiminoesters <b>1</b> .....                                                                | S5   |
| 3. Characterization and ee Values of the Products .....                                                                                    | S19  |
| 4. Studies on Reaction Mechanism.....                                                                                                      | S66  |
| 5.1. DFT Studies on the Reaction Mechanism .....                                                                                           | S66  |
| 5.2. Optimized Structures of Chiral Ligand <b>L6</b> .....                                                                                 | S82  |
| 5.3. Optimized Structures of the Catalyst, Transition States and the Reaction Intermediates.....                                           | S89  |
| 5. Copies of NMR Spectra of the Products and Ligands.....                                                                                  | S161 |
| 6. References.....                                                                                                                         | S210 |

## 1. Experimental Section

### 1.1. General Information

$^1\text{H}$  NMR and  $^{13}\text{C}\{^1\text{H}\}$  NMR spectra were recorded on 400 MHz nuclear magnetic resonance spectrometer with tetramethylsilane (TMS) as the internal standard. High performance liquid chromatography experiments were performed with Daicel chiral column (AD-H, OD-H, IA, IB, IC, OB-H etc.). Specific rotations were measured with an automatic polarimeter. High-resolution mass spectra (HRMS) were obtained with Varian 7.0T Fourier transform ion cyclotron resonance mass spectrometer. The solvents (such as petroleum ether, ethyl acetate, dichloromethane, etc.) are analytical grade. The room temperature was 25 °C; the silica gel used for column chromatography was 200-300 mesh. Unless otherwise noted, commercial reagents were used as received. All solvents were handled in accordance with standard procedures.

Ligands **C1-C3** are commercially available. Preparation of chiral ligands **L1-L13** have been reported previously.<sup>1</sup>

### 1.2. Optimization of Reaction Conditions

**Table S1.** Enantioselective Friedel-Crafts reaction of 1-phenylpyrrolidine **2a** with  $\alpha$ -ketiminoester **1a**.<sup>[a]</sup>

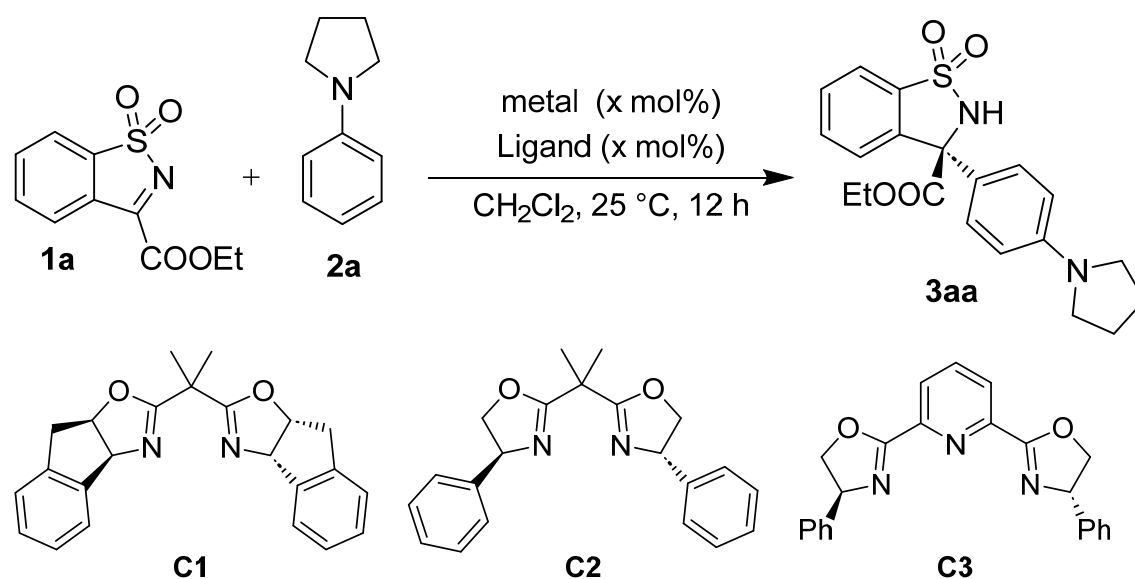

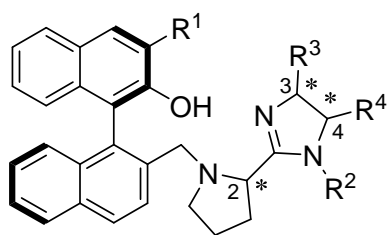

- $(R_a, S_2)$ -L1:  $R^1 = H, R^2 = Ts, R^3 = H, R^4 = H$   
 $(R_a, S_2, S_3)$ -L2:  $R^1 = H, R^2 = Ts, R^3 = i\text{-Pr}, R^4 = H$   
 $(R_a, S_2, S_3)$ -L3:  $R^1 = H, R^2 = Ts, R^3 = t\text{-Bu}, R^4 = H$   
 $(R_a, S_2, S_3, S_4)$ -L4:  $R^1 = H, R^2 = Ts, R^3 = \text{Ph}, R^4 = \text{Ph}$   
 $(R_a, S_2, R_3, R_4)$ -L5:  $R^1 = H, R^2 = Ts, R^3 = \text{Ph}, R^4 = \text{Ph}$   
 $(R_a, S_2, S_3, S_4)$ -L6:  $R^1 = \text{Cl}, R^2 = Ts, R^3 = \text{Ph}, R^4 = \text{Ph}$   
 $(R_a, S_2, S_3, S_4)$ -L7:  $R^1 = \text{I}, R^2 = Ts, R^3 = \text{Ph}, R^4 = \text{Ph}$   
 $(R_a, S_2, S_3, S_4)$ -L8:  $R^1 = \text{CF}_3, R^2 = Ts, R^3 = \text{Ph}, R^4 = \text{Ph}$   
 $(R_a, S_2, R_3, R_4)$ -L9:  $R^1 = \text{Cl}, R^2 = Ts, R^3 = \text{Ph}, R^4 = \text{Ph}$   
 $(R_a, S_2, R_3, R_4)$ -L10:  $R^1 = \text{CF}_3, R^2 = Ts, R^3 = \text{Ph}, R^4 = \text{Ph}$   
 $(R_a, S_2, S_3)$ -L11:  $R^1 = \text{Cl}, R^2 = Ts, R^3 = t\text{-Bu}, R^4 = H$   
 $(R_a, S_2, S_3)$ -L12:  $R^1 = \text{Cl}, R^2 = \text{Ns}, R^3 = t\text{-Bu}, R^4 = H$   
 $(R_a, S_2, S_3)$ -L13:  $R^1 = \text{Cl}, R^2 = \text{Bs}, R^3 = t\text{-Bu}, R^4 = H$

| Entry             | Ligand | Metal                                                 | x (mol%) | Yield (%) <sup>[b]</sup> | ee (%) <sup>[c]</sup> | Config. <sup>[d]</sup> |
|-------------------|--------|-------------------------------------------------------|----------|--------------------------|-----------------------|------------------------|
| 1                 | C1     | Cu(OTf) <sub>2</sub>                                  | 10       | 30                       | 27                    | R                      |
| 2                 | C2     | Cu(OTf) <sub>2</sub>                                  | 10       | 40                       | 71                    | S                      |
| 3                 | C3     | Cu(OTf) <sub>2</sub>                                  | 10       | Trace                    | -                     | -                      |
| 4                 | L1     | Cu(OTf) <sub>2</sub>                                  | 10       | 98                       | 65                    | R                      |
| 5                 | L2     | Cu(OTf) <sub>2</sub>                                  | 10       | 92                       | 90                    | R                      |
| 6                 | L3     | Cu(OTf) <sub>2</sub>                                  | 10       | 86                       | 81                    | R                      |
| 7                 | L4     | Cu(OTf) <sub>2</sub>                                  | 10       | 85                       | 95                    | R                      |
| 8                 | L5     | Cu(OTf) <sub>2</sub>                                  | 10       | 85                       | 72                    | S                      |
| 9                 | L6     | Cu(OTf) <sub>2</sub>                                  | 10       | 95                       | >99                   | R                      |
| 10                | L7     | Cu(OTf) <sub>2</sub>                                  | 10       | 94                       | >99                   | R                      |
| 11                | L8     | Cu(OTf) <sub>2</sub>                                  | 10       | 97                       | >99                   | R                      |
| 12                | L9     | Cu(OTf) <sub>2</sub>                                  | 10       | 93                       | 40                    | R                      |
| 13                | L10    | Cu(OTf) <sub>2</sub>                                  | 10       | 88                       | 38                    | R                      |
| 14                | L11    | Cu(OTf) <sub>2</sub>                                  | 10       | 90                       | 50                    | R                      |
| 15                | L12    | Cu(OTf) <sub>2</sub>                                  | 10       | 80                       | 40                    | R                      |
| 16                | L13    | Cu(OTf) <sub>2</sub>                                  | 10       | 95                       | 47                    | R                      |
| 17                | L8     | Cu(ClO <sub>4</sub> ) <sub>2</sub> ·6H <sub>2</sub> O | 10       | 95                       | 99                    | R                      |
| 18                | L8     | Zn(OTf) <sub>2</sub>                                  | 10       | 90                       | 69                    | R                      |
| 19                | L8     | Sc(OTf) <sub>3</sub>                                  | 10       | 30                       | 5                     | R                      |
| 20                | L8     | Ni(OTf) <sub>2</sub>                                  | 10       | 98                       | >99                   | R                      |
| 21                | L8     | Ni(ClO <sub>4</sub> ) <sub>2</sub> ·6H <sub>2</sub> O | 10       | 90                       | 99                    | R                      |
| 22 <sup>[e]</sup> | L8     | Ni(OTf) <sub>2</sub>                                  | 10       | 89                       | 99                    | R                      |
| 23 <sup>[f]</sup> | L8     | Ni(OTf) <sub>2</sub>                                  | 10       | 90                       | 99                    | R                      |

|                   |    |                      |      |      |     |   |
|-------------------|----|----------------------|------|------|-----|---|
| 24 <sup>[g]</sup> | L8 | Ni(OTf) <sub>2</sub> | 10   | none | -   | - |
| 25                | L8 | Cu(OTf) <sub>2</sub> | 5    | 93   | >99 | R |
| 26                | L8 | Ni(OTf) <sub>2</sub> | 5    | 95   | >99 | R |
| 27                | L8 | Cu(OTf) <sub>2</sub> | 1    | 91   | >99 | R |
| 28                | L8 | Ni(OTf) <sub>2</sub> | 1    | 94   | >99 | R |
| 29 <sup>[h]</sup> | L8 | Cu(OTf) <sub>2</sub> | 0.5  | 61   | 88  | R |
| 30 <sup>[h]</sup> | L8 | Ni(OTf) <sub>2</sub> | 0.5  | 94   | >99 | R |
| 31 <sup>[h]</sup> | L8 | Ni(OTf) <sub>2</sub> | 0.1  | 94   | >99 | R |
| 32 <sup>[h]</sup> | L8 | Ni(OTf) <sub>2</sub> | 0.05 | 71   | 80  | R |

<sup>[a]</sup> Unless otherwise noted, all reactions were performed with **1a** (0.15 mmol), **2a** (0.18 mmol), ligand (10 mol%) and Cu(OTf)<sub>2</sub> (10 mol%) in dry CH<sub>2</sub>Cl<sub>2</sub> (1.5 mL) at 25 °C for 12 h.

<sup>[b]</sup> Isolated yield. <sup>[c]</sup> Determined by HPLC on chiral stationary phases. <sup>[d]</sup> The absolute configuration of **3a** was deduced based on the absolute configuration of **3ah** which was assigned by single crystal X-ray diffraction experiment. <sup>[e]</sup> THF as solvent. <sup>[f]</sup> Toluene as solvent. <sup>[g]</sup> Methanol as solvent. <sup>[h]</sup> Reaction time = 24 h.

### 1.3. General Procedures for Enantioselective aza-Friedel-Crafts Reaction of Anilines with Cyclic N-Sulfonyl $\alpha$ -Ketiminioesters

#### *Preparation of the Chiral Catalyst*

Binaphthyl-proline-imidazoline chiral ligand **L8** (23.9 mg, 0.03 mmol), Ni(OTf)<sub>2</sub> (10.7 mg, 0.03 mmol) were stirred in a dry reaction tube in CH<sub>2</sub>Cl<sub>2</sub> (2.0 mL, accessed by pipette) at room temperature, and then the solution was stored in a cool and dry place as stock solution.

#### *General Procedure for the Operation*

Cyclic N-sulfonyl  $\alpha$ -ketiminioester **1** (0.15 mmol) and anilines **2** (0.18 mmol) were stirred in a dry reaction tube in CH<sub>2</sub>Cl<sub>2</sub> (1.5 mL) at 25 °C, 10  $\mu$ l (0.1 mol%) or 50  $\mu$ l (0.5 mol%) of dichloromethane solution of the catalyst was then added to the reaction mixture with a mechanical pipette. The reaction mixture was stirred for 24 h at 25 °C and the reaction was monitored with TLC. After the consumption of ketimine **1**, the reaction mixture was directly purified with flash chromatography (petroleum ether : ethyl acetate = 5:1) on silica gel to give the desired product.

#### 1.4. Transformation of Product 3

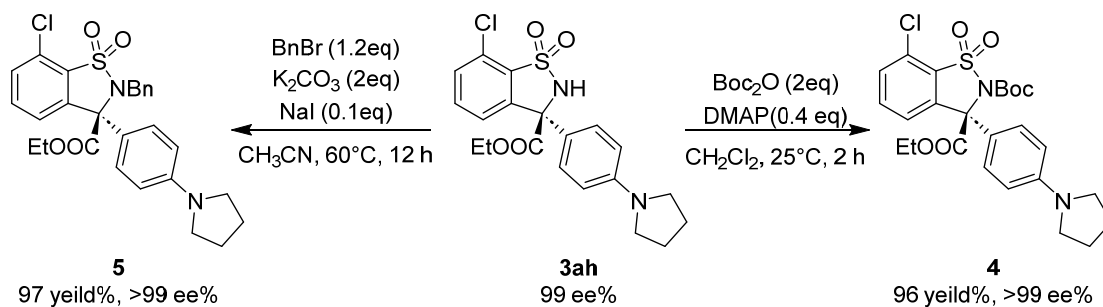

##### Synthesis of Compound 4

$\text{Boc}_2\text{O}$  (104 mg, 0.48 mmol) was slowly added to a mixture of **3ah** (120 mg, 0.24 mmol) and  $\text{DMAP}$  (11.6 mg, 0.09 mmol) in dry  $\text{CH}_2\text{Cl}_2$  (20 mL) at  $0^\circ\text{C}$ . The mixture was stirred for 2 h at room temperature. The organic layer were washed with water, brine, dried with  $\text{Na}_2\text{SO}_4$ , filtered and concentrated *in vacuo*. The crude product was purified with silica gel column chromatography (petroleum ether : ethyl acetate = 5: 1) to give product **4**.

##### Synthesis of Compound 5

$\text{BrBn}$  (49 mg, 0.29 mmol) was added to a mixture of **3ah** (120 mg, 0.24 mmol), potassium carbonate (66 mg, 0.48 mmol) and  $\text{NaI}$  (3.6 mg, 0.02 mmol) in  $\text{CH}_3\text{CN}$  (20 mL). The mixture was stirred for 12 h at  $60^\circ\text{C}$ . After the reaction was completed, 50 mL of  $\text{EtOAc}$  was added to the reaction mixture and the organic layer was washed with water, brine, dried with  $\text{Na}_2\text{SO}_4$ , filtered and was concentrated *in vacuo*. The crude product was purified with silica gel column chromatography (petroleum ether: ethyl acetate = 2: 1) to give product **5**.

##### Synthesis of Compound 6

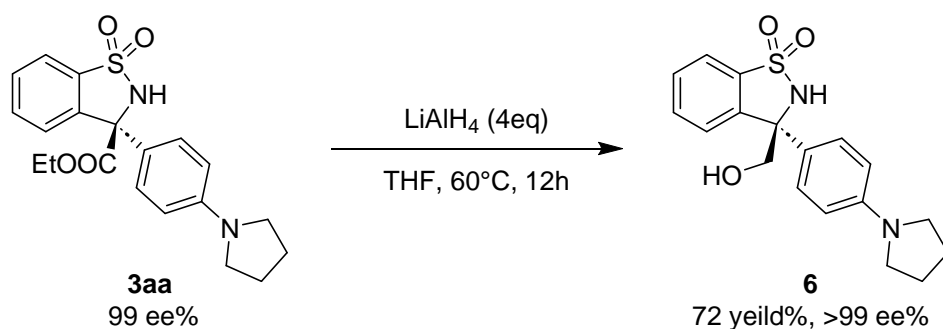

Compound **3aa** (100 mg, 0.26 mmol) was dissolved in 30 mL of dry  $\text{THF}$  at  $0^\circ\text{C}$ , and  $\text{LiAlH}_4$  (39 mg, 1.04 mmol) was added in batches in 30 min. The resulting mixture was refluxed for 12 h. The mixture was quenched with  $\text{Na}_2\text{SO}_4 \cdot 10\text{H}_2\text{O}$  at  $0^\circ\text{C}$ , and the solid was removed by filtration through celite. The filtrate was concentrated *in vacuo* and the residue

was purified by column chromatography (silica gel, petroleum ether : ethyl acetate 1:1) to give product **6**.

## 2. Preparation of Cyclic N-Sulfonyl $\alpha$ -Ketiminoesters **1**.

General experimental details for the preparation of substrates **1** have been reported previously.<sup>2</sup>

Ethyl benzo[*d*]isothiazole-3-carboxylate 1,1-dioxide (**1a**)

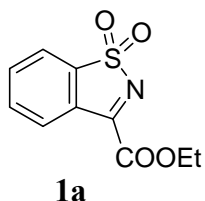

<sup>1</sup>H NMR (400 MHz, Chloroform-*d*)  $\delta$  8.30 (d, *J* = 6.7 Hz, 1H), 7.95 (d, *J* = 6.4 Hz, 1H), 7.82 – 7.74 (m, 2H), 4.55 (q, *J* = 7.2 Hz, 2H), 1.48 (t, *J* = 7.2 Hz, 3H).

<sup>13</sup>C {<sup>1</sup>H} NMR (100 MHz, Chloroform-*d*)  $\delta$  160.6, 160.3, 140.5, 134.5, 134.3, 128.5, 127.8, 123.1, 64.0, 14.2.

Methyl benzo[*d*]isothiazole-3-carboxylate 1,1-dioxide (**1b**)

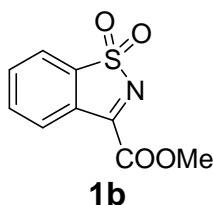

<sup>1</sup>H NMR (400 MHz, Chloroform-*d*)  $\delta$  8.32 – 8.29 (m, 1H), 7.97 – 7.94 (m, 1H), 7.81 – 7.77 (m, 2H), 4.10 (s, 3H).

<sup>13</sup>C {<sup>1</sup>H} NMR (100 MHz, Chloroform-*d*)  $\delta$  161.0, 160.0, 140.3, 134.5, 134.4, 128.3, 127.8, 123.2, 54.2.

Ethyl 5-(trifluoromethyl)benzo[*d*]isothiazole-3-carboxylate 1,1-dioxide (**1c**)

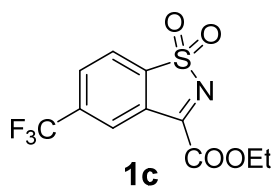

<sup>1</sup>H NMR (400 MHz, Chloroform-*d*) δ 8.62 (s, 1H), 8.09 (t, *J* = 5.4 Hz, 2H), 4.59 (q, *J* = 7.1 Hz, 2H), 1.50 (t, *J* = 7.1 Hz, 3H).

<sup>13</sup>C {<sup>1</sup>H} NMR (100 MHz, Chloroform-*d*) δ 160.2, 158.7, 143.4, 136.8 (q, <sup>2</sup>*J*<sub>C-F</sub> = 33.8 Hz), 131.4 (q, <sup>3</sup>*J*<sub>C-F</sub> = 3.4 Hz), 129.2, 125.1 (q, <sup>3</sup>*J*<sub>C-F</sub> = 3.5 Hz), 123.7, 122.7 (q, <sup>1</sup>*J*<sub>C-F</sub> = 273.6 Hz), 64.4, 14.1.

<sup>19</sup>F NMR (Chloroform-*d*) δ -62.9.

Ethyl 5-methoxybenzo[*d*]isothiazole-3-carboxylate 1,1-dioxide (**1d**)

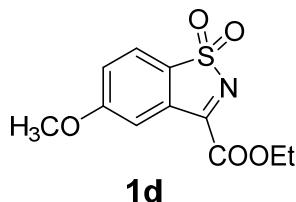

<sup>1</sup>H NMR (400 MHz, Chloroform-*d*) δ 7.82 (d, *J* = 8.4 Hz, 1H), 7.74 (d, *J* = 2.3 Hz, 1H), 7.23 – 7.20 (m, 1H), 4.54 (q, *J* = 7.1 Hz, 2H), 3.95 (s, 3H), 1.48 (t, *J* = 7.2 Hz, 3H).

<sup>13</sup>C {<sup>1</sup>H} NMR (100 MHz, Chloroform-*d*) δ 164.5, 160.6, 159.7, 131.5, 130.8, 124.3, 119.4, 112.6, 63.9, 56.4, 14.1.

Ethyl 7-(trifluoromethoxy)benzo[*d*]isothiazole-3-carboxylate 1,1-dioxide (**1e**)

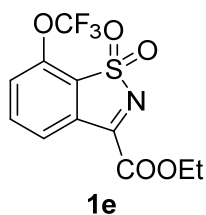

<sup>1</sup>H NMR (400 MHz, Chloroform-*d*) δ 8.22 (d, *J* = 7.7 Hz, 1H), 7.83 (t, *J* = 8.0 Hz, 1H), 7.61 (d, *J* = 7.2 Hz, 1H), 4.56 (q, *J* = 7.1 Hz, 2H), 1.49 (t, *J* = 7.1 Hz, 3H).

<sup>13</sup>C {<sup>1</sup>H} NMR (100 MHz, Chloroform-*d*) δ 160.2, 158.8, 145.2 (q, <sup>3</sup>*J*<sub>C-F</sub> = 2.2 Hz), 137.1, 124.6 (q, <sup>3</sup>*J*<sub>C-F</sub> = 2.9 Hz), 131.0, 125.2, 120.2 (q, <sup>1</sup>*J*<sub>C-F</sub> = 263.3 Hz), 64.2, 14.1.

$^{19}\text{F}$  NMR (Chloroform-*d*)  $\delta$  -57.2.

Ethyl 6-methylbenzo[*d*]isothiazole-3-carboxylate 1,1-dioxide (**1f**)

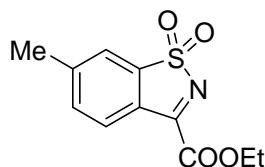

**1f**

$^1\text{H}$  NMR (400 MHz, Chloroform-*d*)  $\delta$  8.15 (d,  $J = 7.9$  Hz, 1H), 7.74 (s, 1H), 7.55 (d,  $J = 7.9$  Hz, 1H), 4.54 (q,  $J = 7.1$  Hz, 2H), 2.55 (s, 3H), 1.48 (t,  $J = 7.1$  Hz, 3H).

$^{13}\text{C}$  { $^1\text{H}$ } NMR (100 MHz, Chloroform-*d*)  $\delta$  160.7, 146.4, 140.4, 135.0, 127.4, 126.1, 123.8, 63.9, 22.0, 14.1.

Ethyl 5-(tert-butyl)benzo[*d*]isothiazole-3-carboxylate 1,1-dioxide (**1g**)

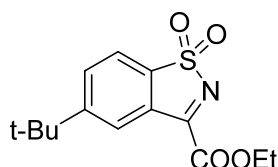

**1g**

$^1\text{H}$  NMR (400 MHz, Chloroform-*d*)  $\delta$  8.30 (s, 1H), 7.86 (d,  $J = 8.0$  Hz, 1H), 7.82 – 7.79 (m, 1H), 4.54 (q,  $J = 7.1$  Hz, 2H), 1.49 (t,  $J = 7.1$  Hz, 3H), 1.39 (s, 9H).

$^{13}\text{C}$  { $^1\text{H}$ } NMR (100 MHz, Chloroform-*d*)  $\delta$  160.5, 159.2, 137.5, 131.4, 128.9, 63.8, 35.9, 31.2, 14.1.

Ethyl 7-chlorobenzo[*d*]isothiazole-3-carboxylate 1,1-dioxide (**1h**)

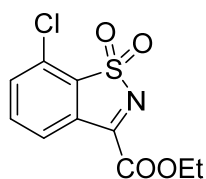

**1h**

$^1\text{H}$  NMR (400 MHz, Chloroform-*d*)  $\delta$  8.23 – 8.18 (m, 1H), 7.73 – 7.68 (m, 2H), 4.55 (q,  $J = 7.1$  Hz, 2H), 1.48 (t,  $J = 7.1$  Hz, 3H).

$^{13}\text{C}$  { $^1\text{H}$ } NMR (100 MHz, Chloroform-*d*)  $\delta$  160.2, 158.9, 137.7, 135.9, 134.9, 131.2, 130.5, 125.9, 64.2, 14.1.



Ethyl 5-chlorobenzo[*d*]isothiazole-3-carboxylate 1,1-dioxide (**1i**)

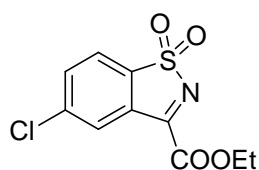

**1i**

$^1\text{H}$  NMR (400 MHz, Chloroform-*d*)  $\delta$  8.31 (d,  $J = 1.6$  Hz, 1H), 7.88 (d,  $J = 8.1$  Hz, 1H), 7.77 – 7.74 (m, 1H), 4.56 (q,  $J = 7.1$  Hz, 2H), 1.49 (t,  $J = 7.1$  Hz, 3H).

$^{13}\text{C}$  { $^1\text{H}$ } NMR (100 MHz, Chloroform-*d*)  $\delta$  160.2, 158.9, 141.1, 138.5, 134.1, 130.1, 127.9, 123.9, 64.2, 14.1.

Ethyl naphtho[2,1-*d*]isothiazole-3-carboxylate 1,1-dioxide (**1j**)

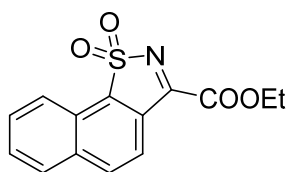

**1j**

$^1\text{H}$  NMR (400 MHz, Chloroform-*d*)  $\delta$  8.33 (d,  $J = 8.1$  Hz, 1H), 8.23 – 8.14 (m, 2H), 8.02 (d,  $J = 8.0$  Hz, 1H), 7.82 – 7.73 (m, 2H), 4.57 (q, 2H), 1.51 (t,  $J = 7.1$  Hz, 3H).

$^{13}\text{C}$  { $^1\text{H}$ } NMR (100 MHz, Chloroform-*d*)  $\delta$  160.9, 160.8, 138.3, 135.3, 130.4, 130.2, 128.9, 124.7, 121.4, 64.0, 14.2.

Ethyl naphtho[2,3-*d*]isothiazole-3-carboxylate 1,1-dioxide (**1k**)

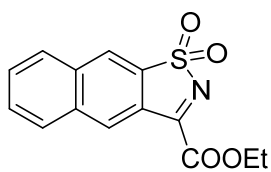

**1k**

$^1\text{H}$  NMR (400 MHz, Chloroform-*d*)  $\delta$  8.79 (s, 1H), 8.38 (s, 1H), 8.10 – 8.02 (m, 2H), 7.82 – 7.73 (m, 2H), 4.59 (q,  $J = 7.1$  Hz, 2H), 1.52 (t,  $J = 7.1$  Hz, 3H).

$^{13}\text{C}$  { $^1\text{H}$ } NMR (100 MHz, Chloroform-*d*)  $\delta$  160.7, 160.2, 134.9, 134.6, 134.2, 131.3, 131.2, 131.0, 130.0, 129.8, 124.5, 63.8, 14.1.

## Preparation of Chiral Ligands

Ligands **C1-C3** are commercially available, and were purchased from Bidepharm Shanghai.

Preparation of chiral ligands **L1-L13** have been developed in our group and has been reported previously.<sup>1</sup>

(*R,S*)-2'-((2-(1-tosyl-4,5-dihydro-1*H*-imidazol-2-yl)pyrrolidin-1-yl)methyl)-[1,1'-binaphthalen]-2-ol (**L1**)

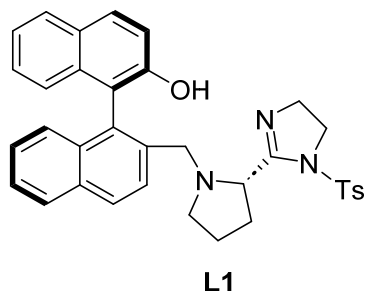

White solid (0.58 g, 59% yield). m. p. = 95-97 °C; (silica gel, petroleum ether: ethyl acetate = 5: 1).

$[\alpha]_D^{20}$  +247.42 (*c* = 0.30, CH<sub>2</sub>Cl<sub>2</sub>).

<sup>1</sup>H NMR (400 MHz, Chloroform-*d*) δ 10.49 (s, 1H), 7.84 – 7.71 (m, 4H), 7.67 (d, *J* = 8.2 Hz, 1H), 7.42 – 7.32 (m, 3H), 7.25 (d, *J* = 8.9 Hz, 2H), 7.12 (dd, *J* = 12.9, 7.4 Hz, 3H), 6.98 (t, *J* = 7.7 Hz, 1H), 6.60 (dd, *J* = 15.7, 8.4 Hz, 2H), 3.76 – 3.67 (m, 1H), 3.63 (d, *J* = 12.1 Hz, 1H), 3.55 – 3.44 (m, 1H), 3.27 (q, *J* = 9.6 Hz, 1H), 3.00 (dd, *J* = 13.5, 8.5 Hz, 2H), 2.42 (s, 4H), 2.25 – 2.13 (m, 2H), 2.00 – 1.88 (m, 1H), 1.70 – 1.47 (m, 3H).

<sup>13</sup>C {<sup>1</sup>H} NMR (100 MHz, Chloroform-*d*) δ 163.1, 155.1, 145.2, 138.2, 136.4, 135.2, 133.9, 133.7, 133.0, 130.2, 129.4, 128.6, 127.9, 127.5, 127.3, 127.3, 127.0, 126.4, 126.1, 125.8, 124.0, 122.5, 120.8, 118.2, 61.9, 59.2, 56.0, 50.4, 48.5, 33.1, 23.6, 21.8.

HRMS (ESI) *m/z*: [M+H]<sup>+</sup> calcd for C<sub>35</sub>H<sub>34</sub>N<sub>3</sub>O<sub>3</sub>S 576.2315, found 576.2318.

(*R<sub>a</sub>,S<sub>2</sub>,S<sub>3</sub>*)-2'-((2-(4-isopropyl-1-tosyl-4,5-dihydro-1*H*-imidazol-2-yl)pyrrolidin-1-yl)methyl)-[1,1'-binaphthalen]-2-ol (**L2**)

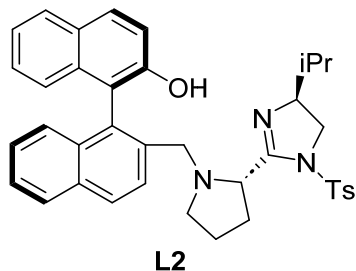

White solid (0.75 g, 61% yield); m. p. = 172-174 °C; (silica gel, petroleum ether : ethyl acetate = 5: 1).

$[\alpha]_D^{20}$  +134.17 ( $c = 0.80$ , CH<sub>2</sub>Cl<sub>2</sub>).

<sup>1</sup>H NMR (400 MHz, Chloroform-*d*)  $\delta$  9.96 (s, 1H), 7.93 – 7.78 (m, 4H), 7.75 (d,  $J = 8.2$  Hz, 1H), 7.49 – 7.30 (m, 5H), 7.26 – 7.18 (m, 1H), 7.15 (d,  $J = 3.7$  Hz, 2H), 7.05 (t,  $J = 7.3$  Hz, 1H), 6.63 (d,  $J = 8.4$  Hz, 1H), 6.50 (d,  $J = 8.3$  Hz, 1H), 3.99 – 3.82 (m, 1H), 3.79 – 3.57 (m, 2H), 3.23 – 2.98 (m, 2H), 2.99 – 2.83 (m, 1H), 2.60 – 2.42 (m, 4H), 2.39 – 2.24 (m, 2H), 1.86 – 1.70 (m, 2H), 1.68 – 1.53 (m, 1H), 0.27 (d,  $J = 6.7$  Hz, 3H), 0.15 (d,  $J = 6.4$  Hz, 3H), -0.05 – -0.30 (m, 1H).

<sup>13</sup>C {<sup>1</sup>H} NMR (100 MHz, Chloroform-*d*)  $\delta$  161.8, 154.8, 145.1, 138.2, 136.1, 134.8, 134.3, 134.0, 133.4, 130.2, 129.5, 128.7, 128.0, 127.7, 127.4, 127.4, 127.0, 126.8, 126.2, 126.1, 125.7, 124.4, 122.7, 121.1, 118.8, 70.1, 62.7, 59.6, 56.1, 53.0, 33.6, 32.7, 23.7, 21.8, 19.5, 18.7.

HRMS (ESI)  $m/z$ : [M+H]<sup>+</sup> calcd for C<sub>38</sub>H<sub>40</sub>N<sub>3</sub>O<sub>3</sub>S 618.2785, found 618.2788.

(*R<sub>a</sub>,S<sub>2</sub>,S<sub>3</sub>*)-2'-((2-(4-(tert-butyl)-1-tosyl-4,5-dihydro-1*H*-imidazol-2-yl)pyrrolidin-1-yl)methyl)-[1,1'-binaphthalen]-2-ol (**L3**)

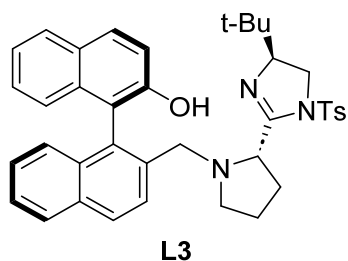

White solid (0.64 g, 53% yield); m. p. = 114-116 °C; (silica gel, petroleum ether: ethyl acetate = 5: 1).

$[\alpha]_D^{20}$  - 35.26 ( $c = 0.70$ , CH<sub>2</sub>Cl<sub>2</sub>);

$^1\text{H}$  NMR (400 MHz, Chloroform-*d*)  $\delta$  7.95 (d,  $J$  = 8.9 Hz, 1H), 7.90 (d,  $J$  = 8.1 Hz, 1H), 7.85 (d,  $J$  = 8.2 Hz, 1H), 7.75 (d,  $J$  = 8.3 Hz, 1H), 7.55 (d,  $J$  = 8.3 Hz, 3H), 7.43 – 7.38 (m, 1H), 7.35 – 7.29 (m, 2H), 7.22 – 7.13 (m, 3H), 6.99 (d,  $J$  = 7.8 Hz, 2H), 6.74 (d,  $J$  = 8.4 Hz, 1H), 4.36 (d,  $J$  = 8.3 Hz, 1H), 3.65 (d,  $J$  = 9.8 Hz, 3H), 3.57 (t,  $J$  = 9.6 Hz, 1H), 3.12 (t,  $J$  = 9.0 Hz, 1H), 2.88 – 2.80 (m, 1H), 2.59 (q,  $J$  = 7.9 Hz, 1H), 2.47 – 2.40 (m, 1H), 2.37 (s, 3H), 2.02 – 1.95 (m, 1H), 1.90 – 1.81 (m, 1H), 1.77 – 1.70 (m, 1H), 0.29 (s, 9H).

$^{13}\text{C}$   $\{^1\text{H}\}$  NMR (100 MHz, Chloroform-*d*)  $\delta$  159.7, 154.3, 144.7, 137.3, 134.8, 134.2, 134.1, 133.5, 130.0, 129.7, 129.1, 128.2, 128.1, 127.8, 127.3, 127.2, 126.7, 126.2, 126.2, 125.6, 125.0, 123.0, 121.6, 120.3, 73.6, 62.6, 58.8, 54.0, 49.2, 32.8, 32.7, 27.0, 25.4, 23.2, 21.5.

HRMS (ESI)  $m/z$ :  $[\text{M}+\text{H}]^+$  calcd for  $\text{C}_{39}\text{H}_{42}\text{N}_3\text{O}_3\text{S}$  632.2941, found 632.2948.

( $R_a, S_2, S_3, S_4$ )-2'-((2-(4,5-diphenyl-1-tosyl-4,5-dihydro-1*H*-imidazol-2-yl)pyrrolidin-1-yl)methyl)-[1,1'-binaphthalen]-2-ol (**L4**)

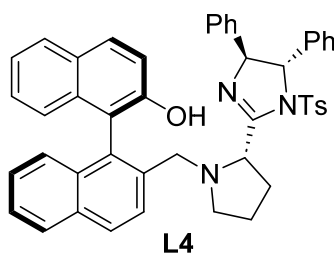

White solid (0.80 g, 57% yield); m. p. = 118-120 °C; (silica gel, petroleum ether: ethyl acetate = 8: 1).

$[\alpha]_{\text{D}}^{20}$  -62.68 ( $c$  = 0.56,  $\text{CH}_2\text{Cl}_2$ ).

$^1\text{H}$  NMR (400 MHz, Chloroform-*d*)  $\delta$  7.94 – 7.90 (m, 2H), 7.87 (d,  $J$  = 8.2 Hz, 2H), 7.69 – 7.64 (m, 1H), 7.51 (d,  $J$  = 8.5 Hz, 2H), 7.47 – 7.42 (m, 2H), 7.32 (t,  $J$  = 8.4 Hz, 4H), 7.16 (t,  $J$  = 9.2 Hz, 6H), 7.09 (d,  $J$  = 8.5 Hz, 1H), 6.97 – 6.92 (m, 1H), 6.77 (d,  $J$  = 8.4 Hz, 1H), 6.63 (t,  $J$  = 6.5 Hz, 4H), 6.11 (d,  $J$  = 7.6 Hz, 2H), 4.80 (d,  $J$  = 5.5 Hz, 1H), 4.65 (d,  $J$  = 8.8 Hz, 1H), 4.60 (d,  $J$  = 5.6 Hz, 1H), 3.84 (d,  $J$  = 12.4 Hz, 1H), 3.72 (d,  $J$  = 12.5 Hz, 1H), 2.91 (d,  $J$  = 9.5 Hz, 1H), 2.69 – 2.60 (m, 1H), 2.41 – 2.31 (m, 1H), 2.25 (s, 3H), 2.07 (d,  $J$  = 8.1 Hz, 1H), 1.97 – 1.88 (m, 1H), 1.82 – 1.76 (m, 1H).

$^{13}\text{C}$   $\{^1\text{H}\}$  NMR (100 MHz, Chloroform-*d*)  $\delta$  161.9, 154.2, 144.5, 141.9, 140.5, 135.2,

134.2, 133.9, 133.4, 132.2, 132.1, 129.8, 129.2, 129.0, 128.6, 128.5, 128.2, 128.2, 128.1, 128.1, 127.6, 127.3, 127.1, 126.9, 126.4, 126.4, 126.2, 125.7, 125.6, 125.1, 123.0, 121.8, 71.9, 62.9, 58.5, 53.6, 32.3, 26.9, 23.3, 21.4.

HRMS (ESI) m/z:  $[M+H]^+$  calcd for  $C_{47}H_{42}N_3O_3S$  728.2941, found 728.2947.

(*R<sub>a</sub>,S<sub>2</sub>,R<sub>3</sub>,R<sub>4</sub>*)-2'-((2-(4,5-diphenyl-1-tosyl-4,5-dihydro-1*H*-imidazol-2-yl)pyrrolidin-1-yl)methyl)-[1,1'-binaphthalen]-2-ol (**L5**)

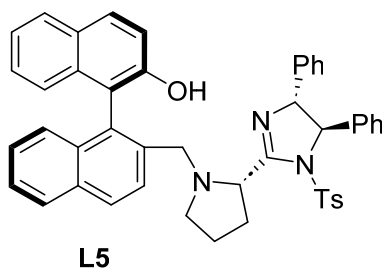

White solid (0.73 g, 53% yield); m. p. = 106-108 °C; (silica gel, petroleum ether : ethyl acetate = 8: 1).

$[\alpha]_D^{20}$  +126.44 ( $c = 0.60$ ,  $CH_2Cl_2$ ).

$^1H$  NMR (400 MHz, Chloroform-*d*)  $\delta$  10.07 (s, 1H), 7.80 – 7.69 (m, 3H), 7.60 (d,  $J = 8.3$  Hz, 1H), 7.33 – 7.25 (m, 2H), 7.20 – 7.13 (m, 3H), 7.12 – 7.03 (m, 9H), 7.00 (t,  $J = 7.6$  Hz, 1H), 6.90 (d,  $J = 8.1$  Hz, 2H), 6.76 (d,  $J = 7.4$  Hz, 2H), 6.62 (dd,  $J = 6.0, 3.0$  Hz, 2H), 6.56 (d,  $J = 8.5$  Hz, 1H), 4.65 (d,  $J = 7.8$  Hz, 1H), 4.12 (d,  $J = 7.7$  Hz, 1H), 3.85 (d,  $J = 7.7$  Hz, 1H), 3.74 (d,  $J = 12.4$  Hz, 1H), 3.38 (d,  $J = 12.4$  Hz, 1H), 2.58 (t,  $J = 7.8$  Hz, 1H), 2.54 – 2.37 (m, 2H), 2.27 (s, 3H), 2.08 – 1.97 (m, 1H), 1.96 – 1.85 (m, 1H), 1.71 – 1.62 (m, 1H).

$^{13}C$   $\{^1H\}$  NMR (100 MHz, Chloroform-*d*)  $\delta$  163.3, 154.8, 144.3, 140.9, 138.9, 137.9, 136.6, 135.0, 134.1, 133.9, 133.1, 129.5, 129.4, 128.9, 128.7, 128.4, 128.1, 128.1, 128.0, 127.7, 127.6, 127.6, 127.3, 126.8, 126.5, 126.1, 126.0, 125.9, 124.5, 122.8, 121.6, 119.4, 76.1, 72.9, 62.8, 59.0, 55.2, 34.3, 23.8, 21.6.

HRMS (ESI) m/z:  $[M+H]^+$  calcd for  $C_{47}H_{42}N_3O_3S$  728.2941, found 728.2949.

(*R<sub>a</sub>,S<sub>2</sub>,S<sub>3</sub>,S<sub>4</sub>*)-3-chloro-2'-((2-((4,5-diphenyl-1-tosyl-4,5-dihydro-1*H*-imidazol-2-yl)pyrrolidin-1-yl)methyl)-[1,1'-binaphthalen]-2-ol (**L6**)

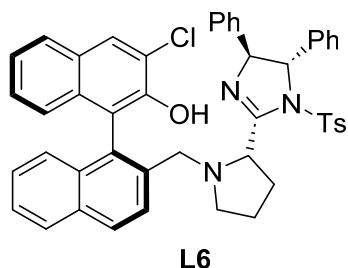

White solid (1.79 g, 62% yield); m. p. =178-180 °C; (silica gel, petroleum ether : ethyl acetate = 4:1).

$[\alpha]_D^{20}$  **-33.80** (c = 1.00, CHCl<sub>3</sub>)

<sup>1</sup>H NMR (400 MHz, Chloroform-*d*) δ 7.91 (s, 1H), 7.69 (d, J = 8.2 Hz, 1H), 7.64 (d, J = 8.2 Hz, 1H), 7.57 (d, J = 8.2 Hz, 1H), 7.27 – 7.22 (m, 1H), 7.19 – 7.08 (m, 7H), 7.07 – 7.01 (m, 5H), 6.99 – 6.94 (m, 1H), 6.90 (d, J = 8.1 Hz, 2H), 6.83 (d, J = 7.1 Hz, 2H), 6.66 – 6.58 (m, 2H), 6.53 (d, J = 8.5 Hz, 1H), 4.67 (d, J = 7.5 Hz, 1H), 4.14 – 3.99 (m, 1H), 3.87 (d, J = 7.5 Hz, 1H), 3.69 (d, J = 12.6 Hz, 1H), 3.36 (d, J = 12.6 Hz, 1H), 2.63 – 2.32 (m, 3H), 2.23 (s, 3H), 1.96 (s, 2H), 1.66 (d, J = 6.5 Hz, 1H).

<sup>13</sup>C {<sup>1</sup>H} NMR (100 MHz, Chloroform-*d*) δ 163.1 , 151.0 , 144.4 , 140.7 , 139.1 , 137.7 , 136.4, 134.5, 133.5, 133.0, 132.6, 129.5 , 128.7 , 128.5 , 128.3 , 128.3 , 128.2 , 127.9 , 127.7 , 127.6 , 127.5 , 127.2 , 127.1 , 126.6 , 126.5 , 126.2 , 126.0 , 125.9 , 124.4 , 123.7 , 75.9 , 72.7 , 62.7 , 58.6 , 55.0 , 34.2 , 23.6 , 21.6 .

HRMS (ESI) m/z: [M+H]<sup>+</sup> calcd for C<sub>47</sub>H<sub>41</sub>ClN<sub>3</sub>O<sub>3</sub>S<sup>+</sup> 762.2252; Found 762.2547.

(*R<sub>a</sub>,S<sub>2</sub>,S<sub>3</sub>,S<sub>4</sub>*)-2'-((2-(4,5-diphenyl-1-tosyl-4,5-dihydro-1*H*-imidazol-2-yl)pyrrolidin-1-yl)methyl)-3-iodo-[1,1'-binaphthalen]-2-ol (**L7**)

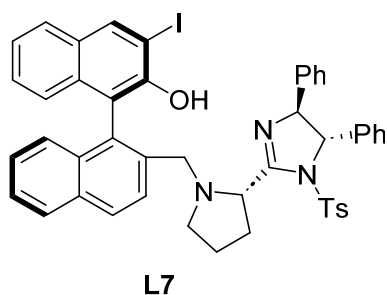

White solid (1.44 g, 58% yield); m. p. = 205-207 °C; (silica gel, petroleum ether: ethyl acetate = 6: 1).

$[\alpha]_D^{20}$  - 30.11 (c = 1.00, CHCl<sub>3</sub>).

<sup>1</sup>H NMR (400 MHz, Chloroform-*d*) δ 11.38 (s, 1H), 8.47 (s, 1H), 7.78 – 7.69 (m, 2H), 7.64 (d, *J* = 8.1 Hz, 1H), 7.34 – 7.16 (m, 6H), 7.09 – 7.01 (m, 4H), 7.01 – 6.94 (m, 3H), 6.92 – 6.86 (m, 1H), 6.67 (t, *J* = 7.5 Hz, 3H), 6.38 (d, *J* = 7.8 Hz, 2H), 6.11 (d, *J* = 7.5 Hz, 2H), 4.72 (d, *J* = 5.5 Hz, 1H), 4.63 – 4.46 (m, 2H), 3.83 (d, *J* = 12.5 Hz, 1H), 3.57 (d, *J* = 12.5 Hz, 1H), 2.91 – 2.75 (m, 1H), 2.61 (q, *J* = 7.8 Hz, 1H), 2.49 – 2.33 (m, 1H), 2.05 (s, 4H), 1.95 – 1.81 (m, 1H), 1.80 – 1.67 (m, 1H).

<sup>13</sup>C {<sup>1</sup>H} NMR (100 MHz, Chloroform-*d*) δ 160.6, 152.8, 144.6, 142.0, 140.7, 139.0, 136.2, 135.2, 134.3, 134.1, 133.5, 133.4, 130.5, 129.8, 129.1, 128.4, 128.1, 127.7, 127.3, 127.2, 127.1, 126.8, 126.6, 126.5, 126.4, 126.2, 125.8, 125.7, 125.4, 123.8, 121.6, 94.0, 71.6, 62.4, 57.6, 52.1, 31.9, 25.1, 22.9, 21.3.

HRMS (ESI) m/z: [M+H]<sup>+</sup> calcd for C<sub>47</sub>H<sub>41</sub>IN<sub>3</sub>O<sub>3</sub>S<sup>+</sup> 854.1908; Found 854.1902.

(*R<sub>a</sub>,S<sub>2</sub>,S<sub>3</sub>,S<sub>4</sub>*)-2'-((2-(4,5-diphenyl-1-tosyl-4,5-dihydro-1*H*-imidazol-2-yl)pyrrolidin-1-yl)methyl)-3-(trifluoromethyl)-[1,1'-binaphthalen]-2-ol (**L8**)

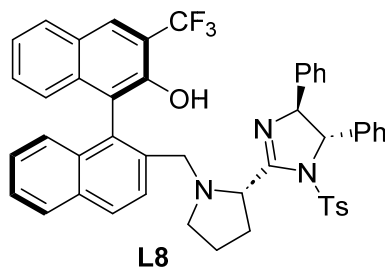

White solid (1.97 g, 66% yield); m. p.= 105-107 °C; (silica gel, petroleum ether: ethyl acetate = 5: 1).

$[\alpha]_D^{20}$  - 58.95 (c = 1.00, CHCl<sub>3</sub>).

<sup>1</sup>H NMR (400 MHz, Chloroform-*d*) δ 11.20 (s, 1H), 8.24 (s, 1H), 7.86 (d, *J* = 8.1 Hz, 1H), 7.78 (t, *J* = 8.2 Hz, 2H), 7.37 – 7.27 (m, 4H), 7.23 – 7.17 (m, 2H), 7.08 (d, *J* = 7.0 Hz, 3H), 7.02 (d, *J* = 8.1 Hz, 2H), 6.94 – 6.90 (m, 2H), 6.73 – 6.68 (m, 3H), 6.49 (d, *J* = 7.9 Hz, 2H), 6.17 (d, *J* = 7.6 Hz, 2H), 4.74 (d, *J* = 5.5 Hz, 1H), 4.60 – 4.54 (m, 2H), 3.84 (d, *J* = 12.4 Hz, 1H), 3.60 (d, *J* = 12.4 Hz, 1H), 2.86 – 2.80 (m, 1H), 2.60 (q, *J* = 7.5 Hz,

1H), 2.34 – 2.27 (m, 1H), 2.11 (s, 3H), 2.02 – 1.85 (m, 2H), 1.85 – 1.57 (m, 2H).

<sup>13</sup>C {<sup>1</sup>H} NMR (100 MHz, Chloroform-*d*) δ 160.9, 151.9, 144.6, 142.0, 140.7, 136.7, 135.8, 135.5, 133.5, 133.5, 129.8, 129.4, 129.1, 128.6, 128.4, 128.3, 128.2, 128.2, 128.1 (q, <sup>3</sup>J<sub>C-F</sub> = 5.7 Hz), 127.8, 127.4, 127.3, 127.2, 126.7, 126.6, 126.4, 125.9, 125.8, 125.3, 124.3 (q, <sup>1</sup>J<sub>C-F</sub> = 272.6 Hz), 124.2, 122.6 (q, <sup>2</sup>J<sub>C-F</sub> = 29.7 Hz), 77.6, 71.7, 62.5, 57.9, 52.5, 31.8, 22.8, 21.4.

<sup>19</sup>F NMR (Chloroform-*d*) δ -62.2.

HRMS (ESI) m/z: [M+H]<sup>+</sup> calcd for C<sub>48</sub>H<sub>41</sub>F<sub>3</sub>N<sub>3</sub>O<sub>3</sub>S<sup>+</sup> 796.2816; Found 796.2810.

(*R<sub>a</sub>,S<sub>2</sub>,R<sub>3</sub>,R<sub>4</sub>*)-3-chloro-2'-((2-(4,5-diphenyl-1-tosyl-4,5-dihydro-1*H*-imidazol-2-yl)pyrrolidin-1-yl)methyl)-[1,1'-binaphthalen]-2-ol (**L9**)

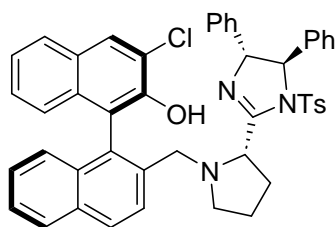

**L9**

White solid (1.47 g, 56% yield); m. p. = 130-132 °C; (silica gel, petroleum ether: ethyl acetate = 5: 1).

[α]<sub>D</sub><sup>20</sup> + 299.10 (c = 1.20, CH<sub>2</sub>Cl<sub>2</sub>).

<sup>1</sup>H NMR (400 MHz, Chloroform-*d*) δ 11.02 (s, 1H), 7.91 (s, 1H), 7.69 (d, J = 8.2 Hz, 1H), 7.64 (d, J = 8.2 Hz, 1H), 7.57 (d, J = 8.2 Hz, 1H), 7.27 – 7.22 (m, 1H), 7.18 – 7.08 (m, 7H), 7.07 – 7.01 (m, 5H), 6.99 – 6.94 (m, 1H), 6.90 (d, J = 8.1 Hz, 2H), 6.83 (d, J = 7.1 Hz, 2H), 6.66 – 6.58 (m, 2H), 6.53 (d, J = 8.5 Hz, 1H), 4.67 (d, J = 7.5 Hz, 1H), 4.14 – 3.99 (m, 1H), 3.87 (d, J = 7.5 Hz, 1H), 3.69 (d, J = 12.6 Hz, 1H), 3.36 (d, J = 12.6 Hz, 1H), 2.63 – 2.32 (m, 3H), 2.23 (s, 3H), 2.02 – 1.85 (m, 2H), 1.72 – 1.58 (m, 1H).

<sup>13</sup>C {<sup>1</sup>H} NMR (100 MHz, Chloroform-*d*) δ 163.1, 151.0, 144.4, 140.7, 139.1, 137.7, 129.5, 128.7, 128.5, 128.3, 128.3, 128.2, 127.9, 127.7, 127.6, 127.5, 127.2, 127.1, 126.6, 126.5, 126.2, 126.0, 125.9, 124.4, 123.7, 75.9, 72.7, 62.7, 58.6, 55.0, 34.2, 23.6, 21.6.

HRMS (ESI) m/z: [M+H]<sup>+</sup> calcd for C<sub>47</sub>H<sub>41</sub>ClN<sub>3</sub>O<sub>3</sub>S<sup>+</sup> 762.2552, found 762.2548.



(*R<sub>a</sub>,S<sub>2</sub>,R<sub>3</sub>,R<sub>4</sub>*)-2'-((2-(4,5-diphenyl-1-tosyl-4,5-dihydro-1*H*-imidazol-2-yl)pyrrolidin-1-yl)methyl)-3-(trifluoromethyl)-[1,1'-binaphthalen]-2-ol (**L10**)

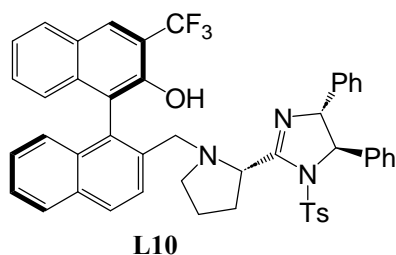

White solid (1.43 g, 61% yield); m. p. = 120-122 °C; (silica gel, petroleum ether : ethyl acetate = 5: 1).

$[\alpha]_D^{20}$  + 77.80 (c = 1.30, CHCl<sub>3</sub>).

<sup>1</sup>H NMR (400 MHz, Chloroform-*d*) δ 11.43 (s, 1H), 8.25 (s, 1H), 7.90 (d, *J* = 8.1 Hz, 1H), 7.82 (d, *J* = 8.2 Hz, 1H), 7.71 (d, *J* = 8.2 Hz, 1H), 7.39 – 7.30 (m, 2H), 7.24 – 7.13 (m, 11H), 7.09 (d, *J* = 8.4 Hz, 1H), 6.97 – 6.90 (m, 4H), 6.82 – 6.78 (m, 2H), 6.69 (d, *J* = 8.5 Hz, 1H), 4.80 (d, *J* = 7.1 Hz, 1H), 4.27 – 4.16 (m, 2H), 3.81 (d, *J* = 12.4 Hz, 1H), 3.49 (d, *J* = 12.3 Hz, 1H), 2.63 – 2.46 (m, 3H), 2.33 (s, 3H), 2.04 (d, *J* = 8.7 Hz, 2H), 1.78 – 1.71 (m, 1H).

<sup>13</sup>C {<sup>1</sup>H} NMR (100 MHz, CDCl<sub>3</sub>) δ 162.6, 152.1, 144.3, 141.1, 139.3, 137.3, 135.6, 134.1, 133.6, 133.1, 129.4, 129.1, 128.7, 128.6, 128.5, 128.3, 128.2, 128.1, 128.0, 127.9, 127.9 (q, <sup>3</sup>*J*<sub>C-F</sub> = 5.7 Hz) 127.6, 127.4, 127.2, 127.1, 126.7, 126.5, 126.0, 125.8, 125.6, 124.3 (q, <sup>1</sup>*J*<sub>C-F</sub> = 273.3 Hz) 122.9, 122.6, 122.1 (q, <sup>2</sup>*J*<sub>C-F</sub> = 29.5 Hz) 121.9, 75.6, 72.7, 62.4, 58.5, 54.4, 33.8, 23.2, 21.5.

<sup>19</sup>F NMR (Chloroform-*d*) δ -62.4.

HRMS (ESI) *m/z*: [M+H]<sup>+</sup> calcd for C<sub>48</sub>H<sub>41</sub>F<sub>3</sub>N<sub>3</sub>O<sub>3</sub>S<sup>+</sup> 796.2816; Found 796.2820.

(*R<sub>a</sub>,S<sub>2</sub>,S<sub>3</sub>*)-2'-((2-(4-(tert-butyl)-1-tosyl-4,5-dihydro-1*H*-imidazol-2-yl)pyrrolidin-1-yl)methyl)-3-chloro-[1,1'-binaphthalen]-2-ol (**L11**)

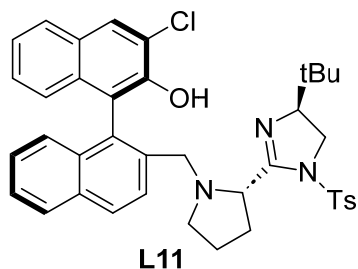

White solid (0.91 g, 70% yield); m. p. = 198-200 °C; (silica gel, petroleum ether : ethyl acetate = 5: 1).

$[\alpha]_D^{20}$  + 27.66 ( $c = 0.98$ , CH<sub>2</sub>Cl<sub>2</sub>).

<sup>1</sup>H NMR (400 MHz, Chloroform-*d*)  $\delta$  10.88 (s, 1H), 8.05 (s, 1H), 7.89 – 7.66 (m, 3H), 7.51 (d,  $J = 8.0$  Hz, 2H), 7.38 (t,  $J = 7.4$  Hz, 1H), 7.29 (t,  $J = 7.5$  Hz, 1H), 7.24 (d,  $J = 8.4$  Hz, 1H), 7.18 (t,  $J = 7.6$  Hz, 1H), 7.09 (t,  $J = 8.3$  Hz, 2H), 6.99 (d,  $J = 7.8$  Hz, 2H), 6.61 (d,  $J = 8.5$  Hz, 1H), 4.27 (d,  $J = 7.9$  Hz, 1H), 3.66 – 3.51 (m, 4H), 3.09 (t,  $J = 7.5$  Hz, 1H), 2.76 – 2.62 (m, 1H), 2.55 (q,  $J = 8.0$  Hz, 1H), 2.48 – 2.29 (m, 4H), 1.97 – 1.88 (m, 1H), 1.88 – 1.78 (m, 1H), 1.77 – 1.68 (m, 1H), 0.24 (s, 9H).

<sup>13</sup>C {<sup>1</sup>H} NMR (100 MHz, Chloroform-*d*)  $\delta$  159.7, 150.8, 144.7, 137.2, 135.0, 134.0, 134.0, 133.6, 132.9, 130.0, 128.9, 128.6, 128.5, 127.9, 127.4, 127.3, 127.0, 126.7, 126.5, 126.3, 125.9, 125.1, 123.9, 122.6, 73.6, 62.7, 59.0, 54.2, 49.2, 33.0, 32.7, 29.8, 25.5, 23.3, 21.6.

HRMS (ESI)  $m/z$ : [M+H]<sup>+</sup> calcd for C<sub>39</sub>H<sub>41</sub>ClN<sub>3</sub>O<sub>3</sub>S 666.2552, found 666.2557.

(*R<sub>a</sub>,S<sub>2</sub>,S<sub>3</sub>*)-2'-((2-(4-(tert-butyl)-1-((4-nitrophenyl)sulfonyl)-4,5-dihydro-1*H*-imidazol-2-yl)pyrrolidin-1-yl)methyl)-3-chloro-[1,1'-binaphthalen]-2-ol (**L12**)

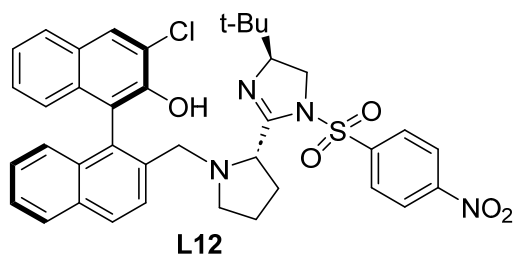

White solid (0.72 g, 68% yield); m. p. = 101-103 °C; (silica gel, petroleum ether: ethyl acetate = 5: 1).

$[\alpha]_D^{20}$  -5.93 ( $c = 0.30$ ,  $\text{CH}_2\text{Cl}_2$ ).

$^1\text{H NMR}$  (400 MHz, Chloroform- $d$ )  $\delta$  10.61 (s, 1H), 7.99 (s, 1H), 7.86 – 7.69 (m, 5H), 7.58 (d,  $J = 8.4$  Hz, 2H), 7.38 – 7.25 (m, 3H), 7.16 – 7.05 (m, 2H), 6.99 (d,  $J = 8.5$  Hz, 1H), 6.59 (d,  $J = 8.4$  Hz, 1H), 4.25 (d,  $J = 8.7$  Hz, 1H), 3.66 – 3.45 (m, 4H), 3.05 – 2.94 (m, 1H), 2.86 – 2.74 (m, 1H), 2.65 – 2.54 (m, 1H), 2.45 – 2.31 (m, 1H), 1.90 – 1.68 (m, 3H), 0.25 (s, 9H).

$^{13}\text{C} \{^1\text{H}\}$  NMR (100 MHz, Chloroform- $d$ )  $\delta$  157.9, 150.5, 150.3, 143.3, 136.5, 133.9, 133.8, 133.6, 132.7, 129.0, 128.9, 128.7, 128.5, 128.0, 127.3, 127.0, 126.7, 126.7, 126.7, 126.1, 125.2, 124.6, 124.5, 123.0, 73.9, 62.2, 58.6, 53.2, 49.0, 33.1, 32.1, 25.4, 23.0.

HRMS (ESI)  $m/z$ :  $[\text{M}+\text{H}]^+$  calcd for  $\text{C}_{38}\text{H}_{38}\text{ClN}_4\text{O}_5\text{S}$  697.2246, found 697.2248.

( $R_a, S_2, S_3$ )-2'-((2-(4-(tert-butyl)-1-(phenylsulfonyl)-4,5-dihydro-1H-imidazol-2-yl)pyrrolidin-1-yl)methyl)-3-chloro-[1,1'-binaphthalen]-2-ol (**L13**)

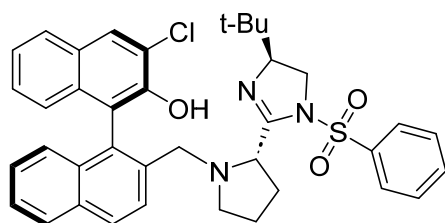

**L13**

White solid (0.96 g, 72% yield); m. p. = 115-117 °C; (silica gel, petroleum ether: ethyl acetate = 6: 1).

$[\alpha]_D^{20}$  +29.41 ( $c = 0.75$ ,  $\text{CH}_2\text{Cl}_2$ ).

$^1\text{H NMR}$  (400 MHz, Chloroform- $d$ )  $\delta$  10.54 (s, 1H), 7.88 (s, 1H), 7.63 (d,  $J = 8.2$  Hz, 1H), 7.60 (d,  $J = 8.1$  Hz, 1H), 7.54 (t,  $J = 8.3$  Hz, 3H), 7.40 (t,  $J = 7.5$  Hz, 1H), 7.23 – 7.19 (m, 1H), 7.18 – 7.10 (m, 3H), 7.09 – 7.05 (m, 1H), 7.03 – 6.98 (m, 1H), 6.95 – 6.89 (m, 2H), 6.43 (d,  $J = 8.5$  Hz, 1H), 4.11 – 4.05 (m, 1H), 3.48 – 3.37 (m, 4H), 2.94 (t,  $J = 8.2$  Hz, 1H), 2.50 – 2.41 (m, 1H), 2.39 – 2.31 (m, 1H), 2.29 – 2.19 (m, 1H), 1.81 – 1.73 (m, 1H), 1.69 – 1.60 (m, 1H), 1.57 – 1.50 (m, 1H), 0.01 (s, 9H).

$^{13}\text{C} \{^1\text{H}\}$  NMR (100 MHz, Chloroform- $d$ )  $\delta$  160.0, 150.6, 137.9, 137.4, 133.9, 133.9, 133.7, 133.5, 132.7, 129.5, 128.6, 128.5, 127.8, 127.4, 127.2, 127.1, 126.7, 126.6, 126.5, 126.3, 125.8, 124.9, 123.9, 122.4, 73.5, 63.0, 59.3, 54.6, 49.2, 33.0, 32.9, 25.3, 23.4.

HRMS (ESI) m/z: [M+H]<sup>+</sup> calcd for C<sub>38</sub>H<sub>39</sub>ClN<sub>3</sub>O<sub>3</sub>S 652.2395, found 652.2398.

### 3. Characterization and ee Values of the Products

(*R*)-Ethyl-3-(4-(pyrrolidin-1-yl)phenyl)-2,3-dihydrobenzo[*d*]isothiazole-3-carboxylate 1,1-dioxide (**3aa**)

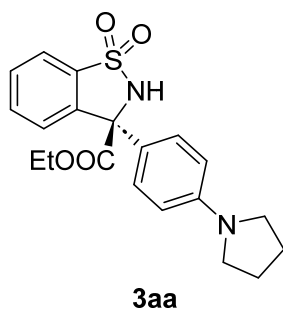

54 mg, colorless oil, **93% yield**, **>99% ee** (silica gel, petroleum ether : ethyl acetate=5: 1).

[ $\alpha$ ]<sub>D</sub><sup>20</sup> + 21.74 (c = 1.00, CHCl<sub>3</sub>).

<sup>1</sup>H NMR (400 MHz, Chloroform-*d*)  $\delta$  7.81 – 7.68 (m, 2H), 7.66 – 7.47 (m, 2H), 7.24 – 7.09 (m, 2H), 6.55 – 6.38 (m, 2H), 5.92 (s, 1H), 4.33 (q, *J* = 7.1 Hz, 2H), 3.31 – 3.17 (m, 4H), 2.04 – 1.90 (m, 4H), 1.30 (t, *J* = 7.1 Hz, 3H).

<sup>13</sup>C {<sup>1</sup>H} NMR (100 MHz, Chloroform-*d*)  $\delta$  169.8, 148.0, 138.4, 135.5, 133.0, 130.2, 127.5, 127.5, 125.1, 121.0, 111.6, 71.2, 63.5, 47.6, 25.5, 14.1.

HRMS (ESI) m/z: [M+H]<sup>+</sup> calcd for C<sub>20</sub>H<sub>23</sub>N<sub>2</sub>O<sub>4</sub>S<sup>+</sup> 387.1374; Found 387.1368.

HPLC The ee value was determined by chiral HPLC analysis (Chiralcel AD-H, hexane/*i*-PrOH = 70/30, flow rate = 1.0 mL/min,  $\lambda$  = 220 nm). Retention times: *t*<sub>R</sub> = 24.5 min for (*S*)-isomer and *t*<sub>R</sub> = 35.2 min for (*R*)-isomer.

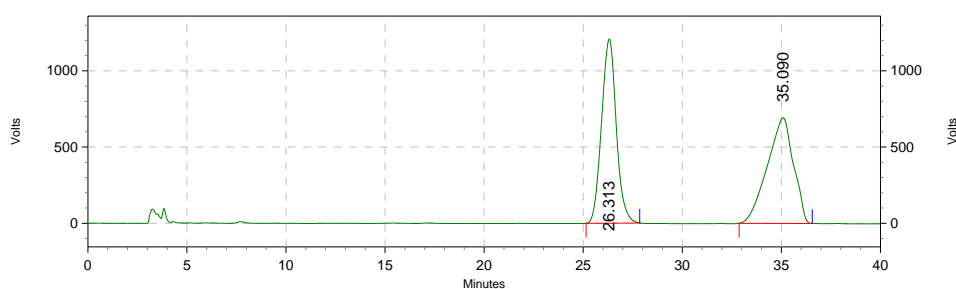

| Peaks | Ret. Time | Area     | Area%  |
|-------|-----------|----------|--------|
| 1     | 26.313    | 62330737 | 49.536 |
| 2     | 35.090    | 63498451 | 50.464 |

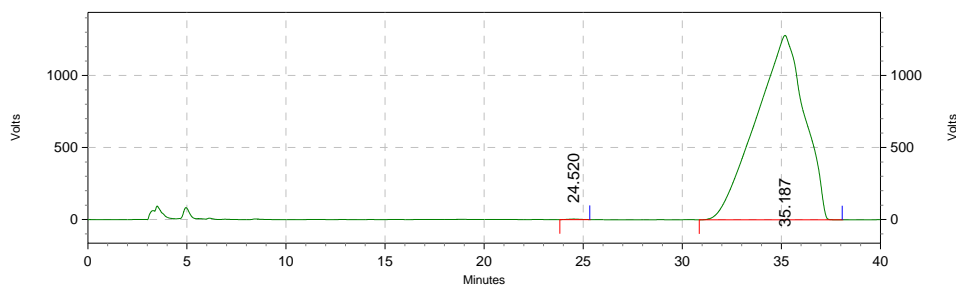

| Peaks | Ret. Time | Area      | Area%  |
|-------|-----------|-----------|--------|
| 1     | 24.520    | 168729    | 0.078  |
| 2     | 35.187    | 217291335 | 99.922 |

(*R*)-Methyl-3-(4-(pyrrolidin-1-yl)phenyl)-2,3-dihydrobenzo[*d*]isothiazole-3-carboxylate 1,1-dioxide (**3ab**)

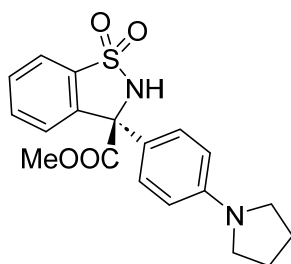

**3ab**

77 mg, yellow oil, **94% yield**, **>99% ee** (silica gel, petroleum ether : ethyl acetate=5:1).

$[\alpha]_D^{20}$  + 53.56 (c = 1.00, CHCl<sub>3</sub>).

<sup>1</sup>H NMR (400 MHz, Chloroform-*d*) δ 7.79 – 7.75 (m, 1H), 7.73 – 7.69 (m, 1H), 7.65 – 7.61 (m, 1H), 7.60 – 7.55 (m, 1H), 7.16 – 7.15 (m, 1H), 7.14 – 7.12 (m, 1H), 6.50 – 6.48 (m, 1H), 6.47 – 6.46 (m, 1H), 5.90 (s, 1H), 3.87 (s, 3H), 3.24 (t, J = 6.6 Hz, 4H), 1.99 – 1.95 (m, 4H).

<sup>13</sup>C {<sup>1</sup>H} NMR (100 MHz, Chloroform-*d*) δ 170.4, 148.1, 138.2, 135.5, 133.1, 130.3, 127.6, 127.5, 124.8, 121.1, 111.6, 71.3, 54.1, 47.6, 25.5.

HRMS (ESI) m/z: [M+H]<sup>+</sup> calcd for C<sub>19</sub>H<sub>21</sub>N<sub>2</sub>O<sub>4</sub>S<sup>+</sup> 373.1217; Found 373.1211.

HPLC The ee value was determined by chiral HPLC analysis (Chiralcel OD-H, hexane/*i*-PrOH = 85/15, flow rate = 1.0 mL/min, λ = 220 nm). Retention times: t<sub>R</sub> = 21.0 min for (*S*)-isomer and t<sub>R</sub> = 31.8 min for (*R*)-isomer.

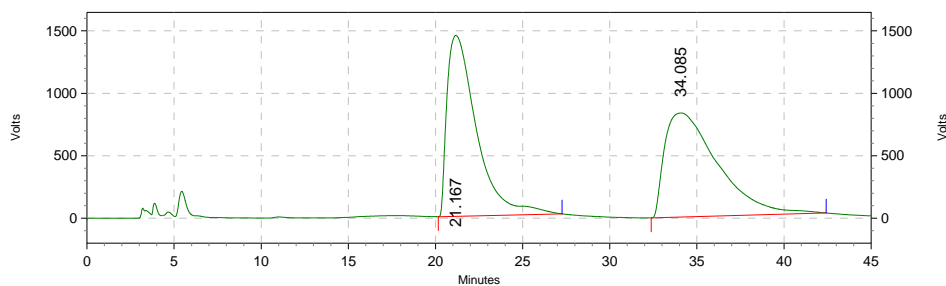

| Peaks | Ret. Time | Area      | Area%  |
|-------|-----------|-----------|--------|
| 1     | 21.167    | 170953440 | 49.251 |
| 2     | 34.085    | 176152146 | 50.749 |

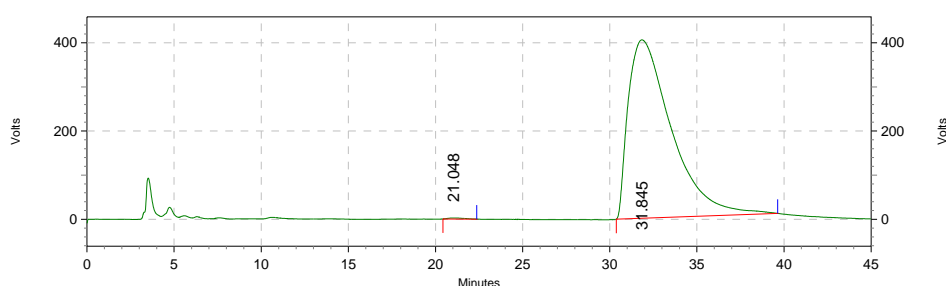

| Peaks | Ret. Time | Area     | Area%  |
|-------|-----------|----------|--------|
| 1     | 21.048    | 152971   | 0.219  |
| 2     | 31.845    | 69695834 | 99.781 |

(*R*)-Ethyl-3-(4-(pyrrolidin-1-yl)phenyl)-5-(trifluoromethyl)-2,3-dihydrobenzo[*d*] isothiazole-3-carboxylate 1,1-dioxide (**3ac**)

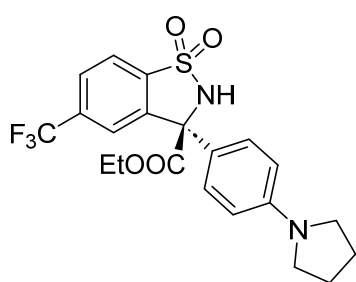

**3ac**

63 mg, red oil, **93% yield**, **>99% ee** (silica gel, petroleum ether : ethyl acetate=5:1).

$[\alpha]_D^{20}$  + 15.91 (c = 1.00, CHCl<sub>3</sub>).

<sup>1</sup>H NMR (400 MHz, Chloroform-*d*) δ 7.99 (s, 1H), 7.90 (d, J = 8.1 Hz, 1H), 7.84 (d, J = 8.1 Hz, 1H), 7.15 (d, J = 8.8 Hz, 2H), 6.50 (d, J = 8.9 Hz, 2H), 6.05 (s, 1H), 4.40 – 4.33 (m, 2H), 3.26 (t, J = 6.5 Hz, 4H), 2.01 – 1.96 (m, 4H), 1.32 (t, J = 7.1 Hz, 3H).

$^{13}\text{C}$   $\{^1\text{H}\}$  NMR (100 MHz, Chloroform-*d*)  $\delta$  169.2 , 148.3 , 139.6 , 138.7, 135.2 (q,  $^2J_{\text{C-F}} = 33.2$  Hz), 127.5 (q,  $^3J_{\text{C-F}} = 3.7$  Hz), 127.4 , 125.0 (q,  $^3J_{\text{C-F}} = 3.9$  Hz), 124.0 , 123.2 (q,  $^1J_{\text{C-F}} = 273.1$  Hz), 122.0 , 111.8 , 71.2 , 63.9 , 47.6 , 25.6 , 14.1 .

$^{19}\text{F}$  NMR (Chloroform-*d*)  $\delta$  -62.7.

HRMS (ESI)  $m/z$ :  $[\text{M}+\text{H}]^+$  calcd for  $\text{C}_{21}\text{H}_{22}\text{F}_3\text{N}_2\text{O}_4\text{S}^+$  455.1247; Found 455.1241.

HPLC The ee value was determined by chiral HPLC analysis (Chiralcel IB, hexane/*i*-PrOH = 90/10, flow rate = 1.0 mL/min,  $\lambda = 220$  nm). Retention times:  $t_{\text{R}} = 15.6$  min for (*S*)-isomer and  $t_{\text{R}} = 20.6$  min for (*R*)-isomer.

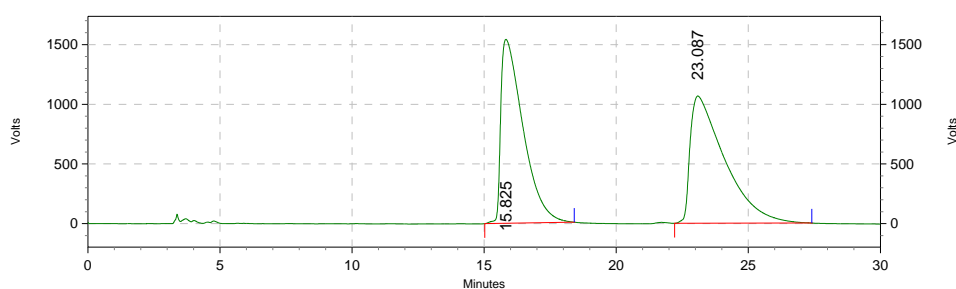

| Peaks | Ret. Time | Area     | Area%  |
|-------|-----------|----------|--------|
| 1     | 15.825    | 90184701 | 48.199 |
| 2     | 23.087    | 96925005 | 51.801 |

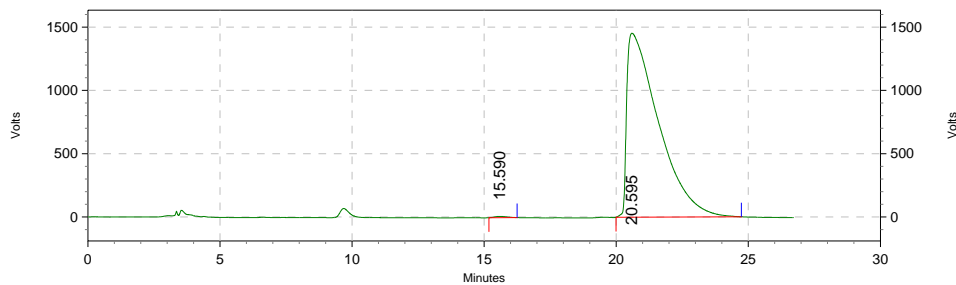

| Peaks | Ret. Time | Area      | Area%  |
|-------|-----------|-----------|--------|
| 1     | 15.590    | 329019    | 0.269  |
| 2     | 20.595    | 121760623 | 99.731 |

Control experiments to study the effect of water on the course of the reaction:

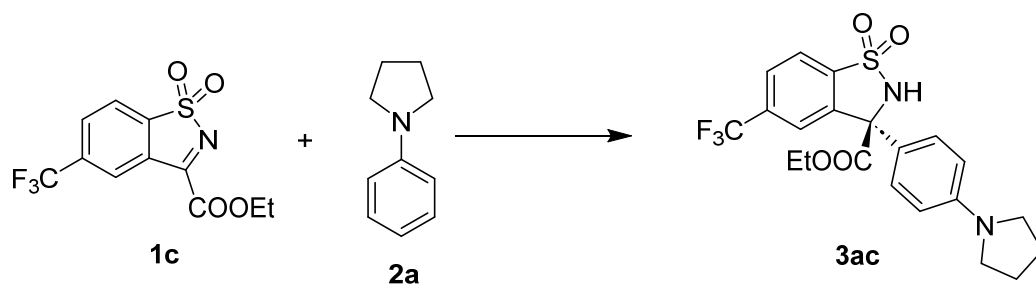

a) Reaction carried out for 5 h with 5% of catalyst:

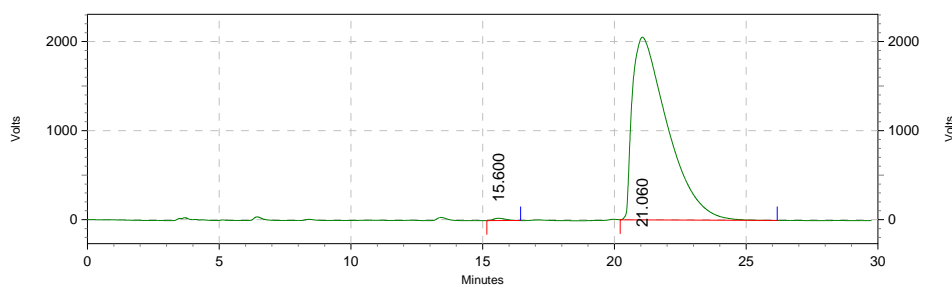

| Peaks | Ret. Time | Area      | Area%  |
|-------|-----------|-----------|--------|
| 1     | 15.600    | 852034    | 0.445  |
| 2     | 21.060    | 190673711 | 99.555 |

b) Reaction carried out for 5 h with 5% of catalyst. Molecular sieves (4 Å) were added to the reaction mixture:

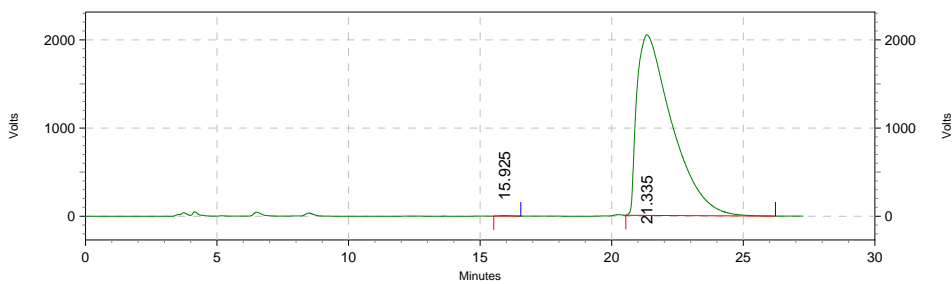

| Peaks | Ret. Time | Area      | Area%  |
|-------|-----------|-----------|--------|
| 1     | 15.925    | 158993    | 0.084  |
| 2     | 21.335    | 189861771 | 99.916 |



c) Reaction carried out for 5 h with 5% of catalyst. Wet CH<sub>2</sub>Cl<sub>2</sub> was used as the solvent:

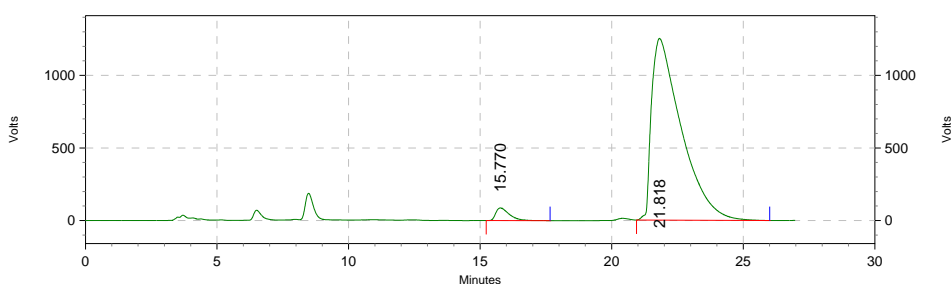

| Peaks | Ret. Time | Area     | Area%  |
|-------|-----------|----------|--------|
| 1     | 15.770    | 3089247  | 3.042  |
| 2     | 21.818    | 98464366 | 96.958 |

(*R*)-Ethyl-5-methoxy-3-(4-(pyrrolidin-1-yl)phenyl)-2,3-dihydrobenzo[*d*]isothiazole-3-carboxylate 1,1-dioxide (**3ad**)

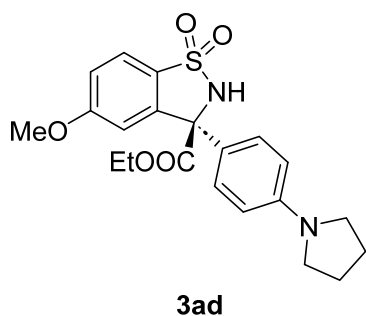

59 mg, yellow oil, **95% yield, 99% ee** (silica gel, petroleum ether : ethyl acetate=5:1).

$[\alpha]_D^{20}$  + 92.72 (c = 1.00, CHCl<sub>3</sub>).

<sup>1</sup>H NMR (400 MHz, Chloroform-*d*) δ 7.67 (d, J = 8.6 Hz, 1H), 7.16 (d, J = 8.7 Hz, 2H), 7.13 (d, J = 1.8 Hz, 1H), 7.09 – 7.06 (m, 1H), 6.49 (d, J = 8.7 Hz, 2H), 5.88 (s, 1H), 4.38 – 4.32 (m, 2H), 3.84 (s, 3H), 3.25 (t, J = 6.3 Hz, 4H), 1.98 (t, J = 6.4 Hz, 4H), 1.32 (t, J = 7.1 Hz, 3H).

<sup>13</sup>C {<sup>1</sup>H} NMR (100 MHz, Chloroform-*d*) δ 169.8, 163.5, 148.0, 141.0, 127.8, 127.5, 125.2, 122.5, 117.2, 111.7, 111.6, 71.0, 63.5, 56.0, 47.6, 25.6, 14.2.

HRMS (ESI) m/z: [M+H]<sup>+</sup> calcd for C<sub>21</sub>H<sub>25</sub>N<sub>2</sub>O<sub>5</sub>S<sup>+</sup> 417.1479; Found 417.1473.

HPLC The ee value was determined by chiral HPLC analysis (Chiralcel IA, hexane/*i*-PrOH = 70/30, flow rate = 1.0 mL/min, λ = 220 nm). Retention times: t<sub>R</sub> = 16.4 min for (*S*)-isomer and t<sub>R</sub> = 24.1 min for (*R*)-isomer.

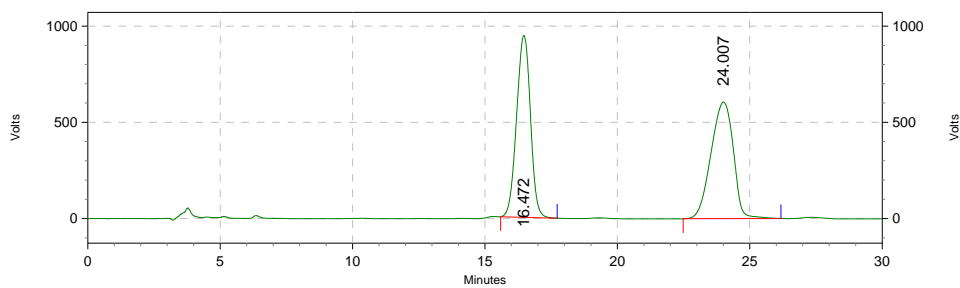

| Peaks | Ret. Time | Area     | Area%  |
|-------|-----------|----------|--------|
| 1     | 16.472    | 34382122 | 49.184 |
| 2     | 24.007    | 35523672 | 50.816 |

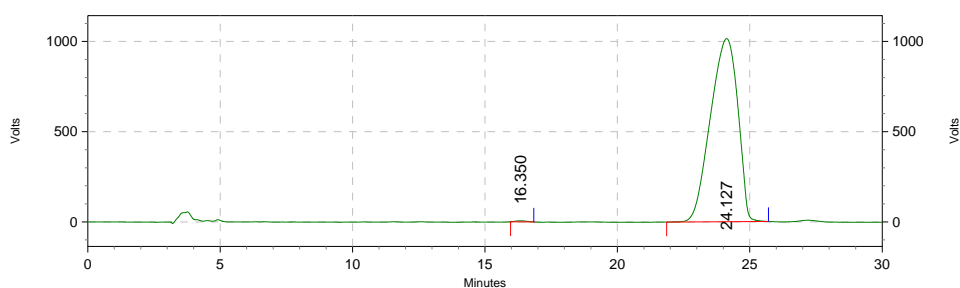

| Peaks | Ret. Time | Area     | Area%  |
|-------|-----------|----------|--------|
| 1     | 16.350    | 177553   | 0.243  |
| 2     | 24.127    | 72974654 | 99.757 |

(*R*)-Ethyl-3-(4-(pyrrolidin-1-yl)phenyl)-7-(trifluoromethoxy)-2,3-dihydrobenzo[*d*]isothiazole-3-carboxylate 1,1-dioxide (**3ae**)

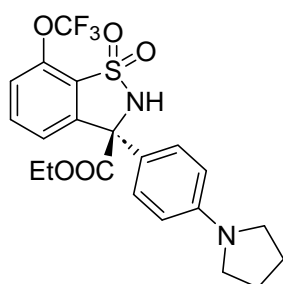

**3ae**

53 mg, yellow solid, **93% yield**, **>99% ee** (silica gel, petroleum ether: ethyl acetate=5:1).

$[\alpha]_D^{20}$  -6.73 (c = 1.00, CHCl<sub>3</sub>); m.p. = 118-120 °C.

<sup>1</sup>H NMR (400 MHz, Chloroform-*d*) δ 7.60 – 7.55 (m, 2H), 7.31 (s, 1H), 7.08 (d, J =

8.8 Hz, 2H), 6.39 (d,  $J = 8.8$  Hz, 2H), 5.99 (s, 1H), 4.26 (q,  $J = 7.1$  Hz, 2H), 3.15 (t,  $J = 6.3$  Hz, 4H), 1.88 (t,  $J = 6.4$  Hz, 4H), 1.22 (t,  $J = 7.1$  Hz, 3H).

$^{13}\text{C}$   $\{^1\text{H}\}$  NMR (100 MHz, Chloroform- $d$ )  $\delta$  169.3, 148.1, 143.3, 141.7, 134.9, 127.5, 127.4, 125.2, 124.2, 120.3 (q,  $J_{\text{C-F}} = 261.8$  Hz), 119.9, 111.6, 70.7, 63.8, 47.5, 25.5, 14.0.

$^{19}\text{F}$  NMR (Chloroform- $d$ )  $\delta$  -57.2.

HRMS (ESI)  $m/z$ :  $[\text{M}+\text{H}]^+$  calcd for  $\text{C}_{21}\text{H}_{22}\text{F}_3\text{N}_2\text{O}_5\text{S}^+$  471.1197; Found 471.1195.

HPLC The ee value was determined by chiral HPLC analysis (Chiralcel IA, hexane/ $i$ -PrOH = 70/30, flow rate = 1.0 mL/min,  $\lambda = 220$  nm). Retention times:  $t_{\text{R}} = 8.9$  min for ( $S$ )-isomer and  $t_{\text{R}} = 11.1$  min for ( $R$ )-isomer.

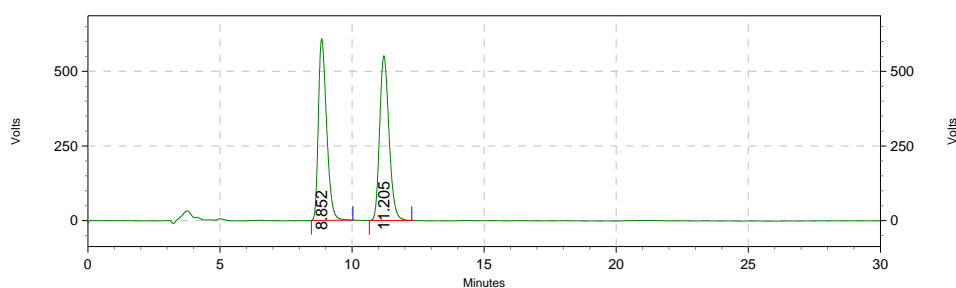

| Peaks | Ret. Time | Area     | Area%  |
|-------|-----------|----------|--------|
| 1     | 8.852     | 13167909 | 49.133 |
| 2     | 11.205    | 13632638 | 50.867 |

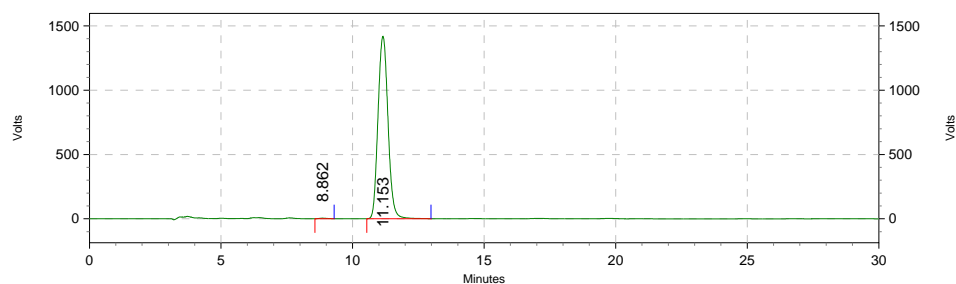

| Peaks | Ret. Time | Area     | Area%  |
|-------|-----------|----------|--------|
| 1     | 8.862     | 96639    | 0.258  |
| 2     | 11.153    | 37412102 | 99.742 |

(*R*)-Ethyl-6-methyl-3-(4-(pyrrolidin-1-yl)phenyl)-2,3-dihydrobenzo[*d*]isothiazole-3-carboxylate 1,1-dioxide (**3af**)

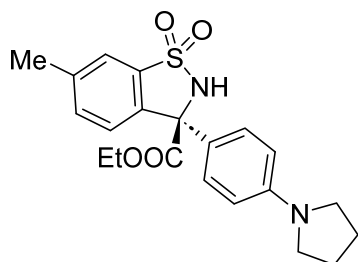

**3af**

57 mg, yellow oil, **95% yield, 99% ee** (silica gel, petroleum ether: ethyl acetate=5:1).

$[\alpha]_D^{20}$  + 29.66 (c = 1.00, CHCl<sub>3</sub>).

<sup>1</sup>H NMR (400 MHz, Chloroform-*d*) δ 7.53 – 7.48 (m, 2H), 7.35 (d, J = 8.0 Hz, 1H), 7.07 (d, J = 8.8 Hz, 2H), 6.40 (d, J = 8.8 Hz, 2H), 5.83 (s, 1H), 4.25 (q, J = 7.1 Hz, 2H), 3.17 (t, J = 6.5 Hz, 4H), 2.38 (s, 2H), 1.92 – 1.88 (m, 4H), 1.22 (t, J = 7.1 Hz, 3H).

<sup>13</sup>C {<sup>1</sup>H} NMR (100 MHz, Chloroform-*d*) δ 170.1, 148.0, 141.0, 135.6, 134.2, 129.6, 127.5, 127.2, 121.0, 111.6, 71.1, 63.5, 47.6, 25.6, 21.3, 14.1.

HRMS (ESI) m/z: [M+H]<sup>+</sup> calcd for C<sub>21</sub>H<sub>25</sub>N<sub>2</sub>O<sub>4</sub>S<sup>+</sup> 401.1530; Found 401.1526.

HPLC The ee value was determined by chiral HPLC analysis (Chiralcel OD-H, hexane/*i*-PrOH = 90/10, flow rate = 1.0 mL/min, λ = 220 nm). Retention times: t<sub>R</sub> = 22.3 min for (*S*)-isomer and t<sub>R</sub> = 36.4 min for (*R*)-isomer.

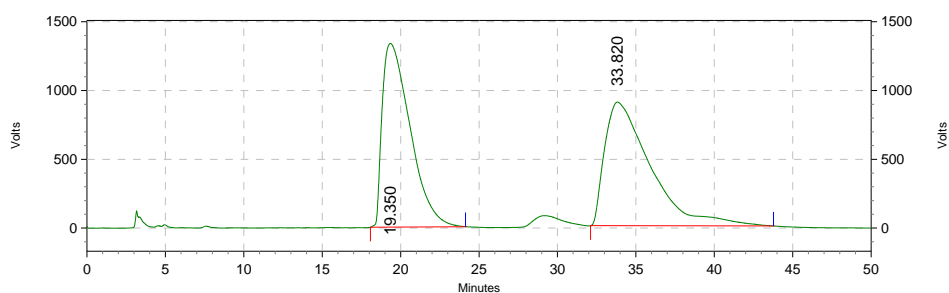

| Peaks | Ret. Time | Area      | Area%  |
|-------|-----------|-----------|--------|
| 1     | 19.350    | 165382562 | 47.636 |
| 2     | 33.820    | 181796058 | 52.364 |

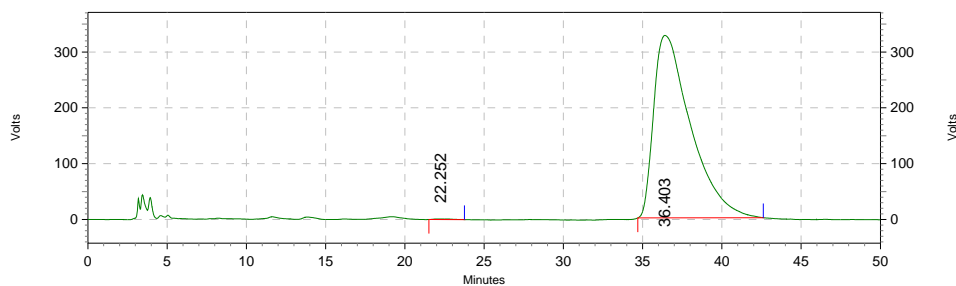

| Peaks | Ret. Time | Area     | Area%  |
|-------|-----------|----------|--------|
| 1     | 22.252    | 81945    | 0.154  |
| 2     | 36.403    | 52980241 | 99.846 |

(*R*)-Ethyl-5-(tert-butyl)-3-(4-(pyrrolidin-1-yl)phenyl)-2,3-dihydrobenzo[*d*]isothiazole-3-carboxylate 1,1-dioxide (**3ag**)

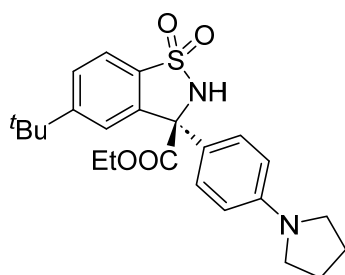

**3ag**

59 mg, yellow oil, **89% yield**, **>99% ee** (silica gel, petroleum ether: ethyl acetate=5:1).

$[\alpha]_D^{20}$  + 85.136 (c = 1.00, CHCl<sub>3</sub>).

<sup>1</sup>H NMR (400 MHz, Chloroform-*d*) δ 7.76 (d, J = 1.6 Hz, 1H), 7.69 (d, J = 0.4 Hz, 1H), 7.63 (d, J = 1.6 Hz, 1H), 7.16 – 7.12 (m, 2H), 6.51 – 6.47 (m, 2H), 5.96 (s, 1H), 4.41 – 4.35 (m, 1H), 4.31 – 4.25 (m, 1H), 3.25 (t, J = 6.6 Hz, 4H), 1.99 – 1.95 (m, 4H), 1.34 (s, 9H), 1.30 (t, J = 7.1 Hz, 3H).

<sup>13</sup>C {<sup>1</sup>H} NMR (100 MHz, Chloroform-*d*) δ 170.1, 157.2, 147.9, 138.2, 133.1, 127.8, 127.5, 125.3, 124.3, 120.6, 111.6, 71.4, 63.4, 47.5, 35.5, 31.2, 25.5, 14.1.

HRMS (ESI) m/z: [M+H]<sup>+</sup> calcd for C<sub>24</sub>H<sub>31</sub>N<sub>2</sub>O<sub>4</sub>S<sup>+</sup> 443.2000; Found 443.1996.

HPLC The ee value was determined by chiral HPLC analysis (Chiralcel OD-H, hexane/*i*-PrOH = 90/10, flow rate = 1.0 mL/min, λ = 220 nm). Retention times: t<sub>R</sub> = 16.7 min for (*S*)-isomer and t<sub>R</sub> = 26.2 min for (*R*)-isomer.

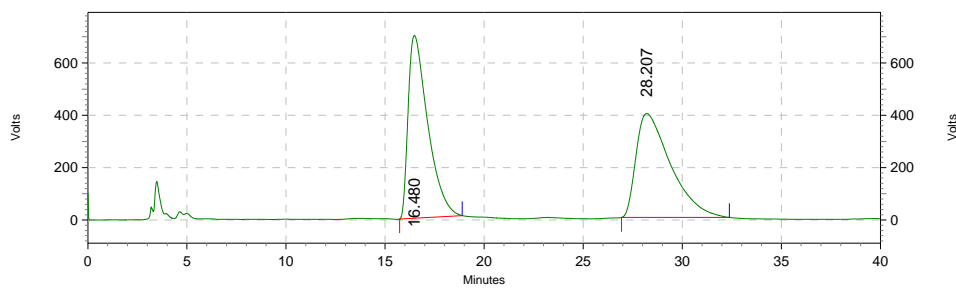

| Peaks | Ret. Time | Area     | Area%  |
|-------|-----------|----------|--------|
| 1     | 16.480    | 48028585 | 50.011 |
| 2     | 28.207    | 48007182 | 49.989 |

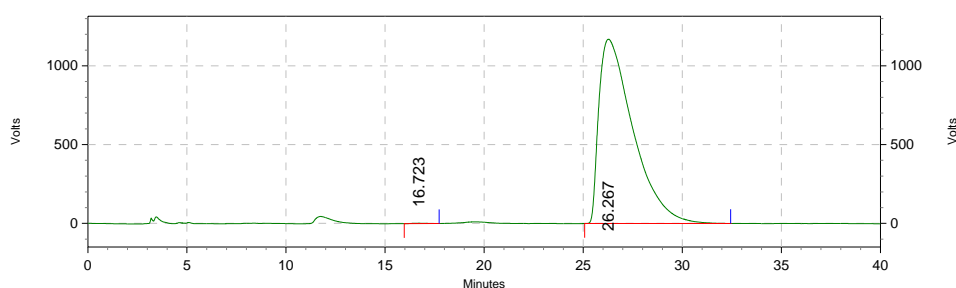

| Peaks | Ret. Time | Area      | Area%  |
|-------|-----------|-----------|--------|
| 1     | 16.723    | 130845    | 0.093  |
| 2     | 26.267    | 140175863 | 99.907 |

(*R*)-Ethyl-7-chloro-3-(4-(pyrrolidin-1-yl)phenyl)-2,3-dihydrobenzo[*d*]isothiazole-3-carboxylate 1,1-dioxide (**3ah**)

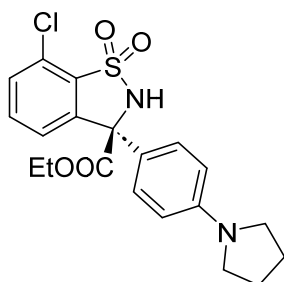

**3ah**

60 mg, white solid, m.p.= 65-67 °C, **96% yield, 99% ee** (silica gel, petroleum ether: ethyl acetate=5:1). X-ray diffraction experiment confirmed the (*R*)-configuration of the compound (CCDC 2354218, Figure S1).

$[\alpha]_D^{20}$  - 38.46 (c = 1.00, CHCl<sub>3</sub>).

<sup>1</sup>H NMR (400 MHz, Chloroform-*d*) δ 7.63 (d, J = 7.5 Hz, 1H), 7.58 – 7.46 (m, 2H),

7.16 (d,  $J = 8.4$  Hz, 2H), 6.48 (d,  $J = 8.4$  Hz, 2H), 6.01 (s, 1H), 4.34 (q,  $J = 7.0$  Hz, 2H), 3.26 (s, 4H), 1.98 (s, 4H), 1.31 (t,  $J = 7.0$  Hz, 3H).

$^{13}\text{C}$   $\{^1\text{H}\}$  NMR (100 MHz, Chloroform- $d$ )  $\delta$  169.4, 148.1, 141.2, 134.1, 133.5, 131.0, 128.6, 127.5, 125.9, 124.5, 111.6, 70.3, 63.8, 47.6, 25.6, 14.1.

HRMS (ESI)  $m/z$ :  $[\text{M}+\text{H}]^+$  calcd for  $\text{C}_{24}\text{H}_{27}\text{N}_2\text{O}_4\text{S}^+$  421.0984; Found 421.0978.

HPLC The ee value was determined by chiral HPLC analysis (Chiralcel IA, hexane/ $i$ -PrOH = 80/20, flow rate = 1.0 mL/min,  $\lambda = 220$  nm). Retention times:  $t_{\text{R}} = 24.3$  min for ( $S$ )-isomer and  $t_{\text{R}} = 30.3$  min for ( $R$ )-isomer.

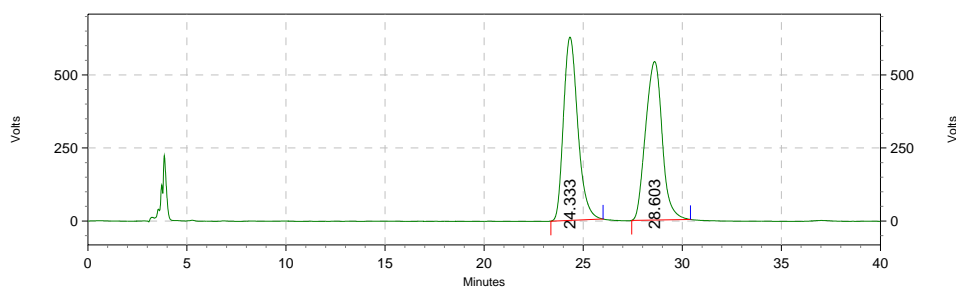

| Peaks | Ret. Time | Area     | Area%  |
|-------|-----------|----------|--------|
| 1     | 24.333    | 31470835 | 49.921 |
| 2     | 28.603    | 31570063 | 50.079 |

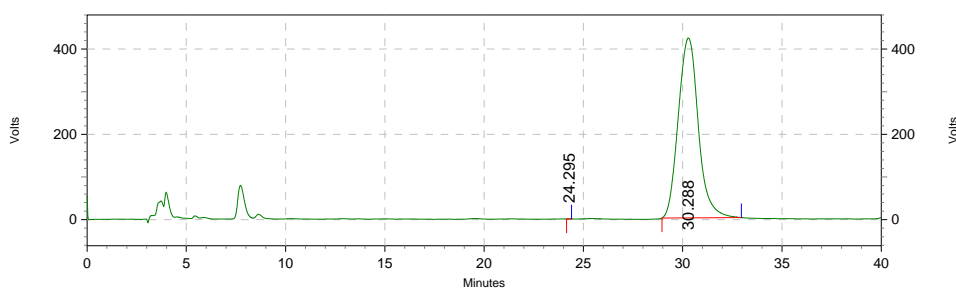

| Peaks | Ret. Time | Area     | Area%  |
|-------|-----------|----------|--------|
| 1     | 24.295    | 779      | 0.003  |
| 2     | 30.288    | 29571283 | 99.997 |

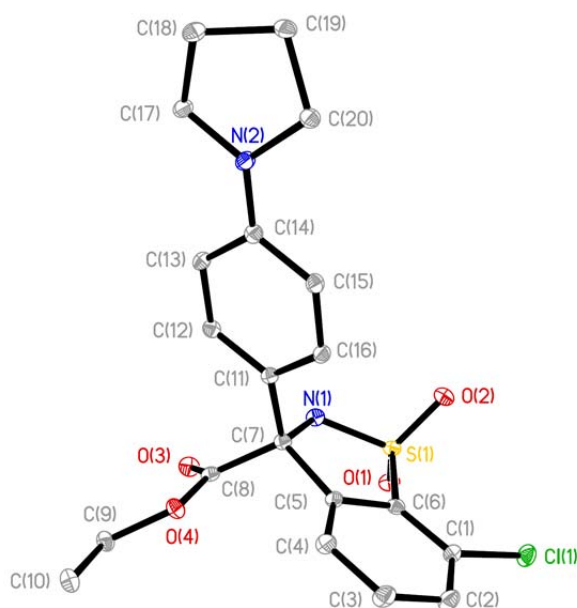

**Figure S1.** ORTEP Drawing of **3ah** with thermal ellipsoids at 30% of probability (CCDC 2354218). Hydrogen atoms were omitted for clarity.

(*R*)-Ethyl-5-chloro-3-(4-(pyrrolidin-1-yl)phenyl)-2,3-dihydrobenzo[*d*]isothiazole-3-carboxylate 1,1-dioxide (**3ai**)

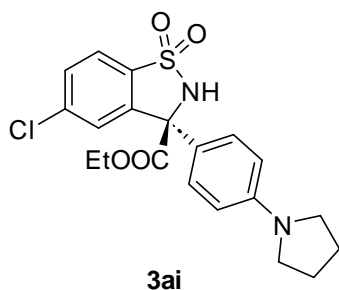

59 mg, colourless oil, **94% yield, 99% ee** (silica gel, petroleum ether: ethyl acetate=5:1).

$[\alpha]_D^{20}$  + 38.46 (c = 1.00, CHCl<sub>3</sub>).

<sup>1</sup>H NMR (400 MHz, Chloroform-*d*) δ 7.72 – 7.66 (m, 2H), 7.55 – 7.52 (m, 1H), 7.17 (d, J = 8.8 Hz, 2H), 6.49 (d, J = 8.8 Hz, 2H), 5.96 (s, 1H), 4.39 – 4.33 (m, 2H), 3.26 (t, J = 6.5 Hz, 4H), 2.01 – 1.96 (m, 4H), 1.33 (t, J = 7.1 Hz, 3H).

<sup>13</sup>C {<sup>1</sup>H} NMR (100 MHz, Chloroform-*d*) δ 169.3, 148.2, 140.5, 139.5, 133.9, 130.8, 127.7, 127.4, 124.3, 122.3, 111.7, 70.8, 63.8, 47.6, 25.6, 14.1.

HRMS (ESI) m/z: [M+H]<sup>+</sup> calcd for C<sub>20</sub>H<sub>22</sub>ClN<sub>2</sub>O<sub>4</sub>S<sup>+</sup> 421.0984; Found 421.0979.

HPLC The ee value was determined by chiral HPLC analysis (Chiralcel IA,



hexane/i-PrOH = 70/30, flow rate = 1.0 mL/min,  $\lambda = 220$  nm). Retention times:  $t_R = 11.5$  min for (*S*)-isomer and  $t_R = 16.9$  min for (*R*)-isomer.

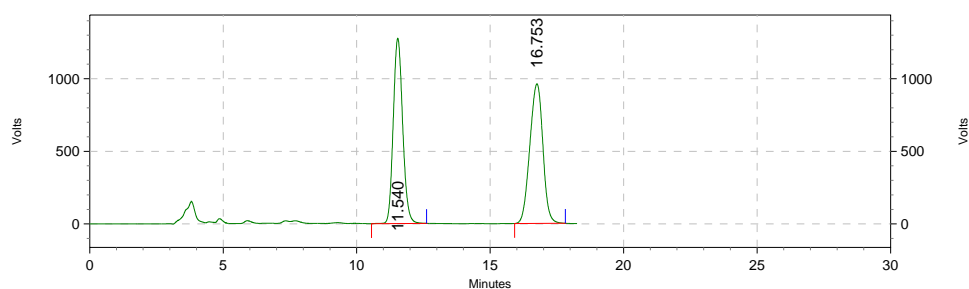

| Peaks | Ret. Time | Area     | Area%  |
|-------|-----------|----------|--------|
| 1     | 11.540    | 31314926 | 48.978 |
| 2     | 16.753    | 32621987 | 51.022 |

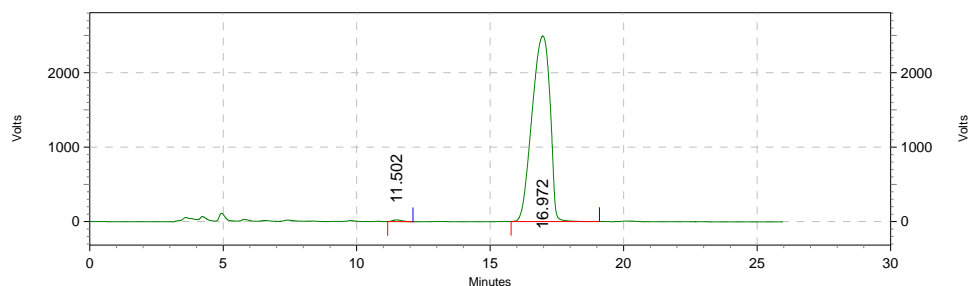

| Peaks | Ret. Time | Area      | Area%  |
|-------|-----------|-----------|--------|
| 1     | 11.502    | 538527    | 0.461  |
| 2     | 16.972    | 116371389 | 99.539 |

(*R*)-Ethyl-3-(4-(pyrrolidin-1-yl)phenyl)-2,3-dihydro[2,1-*d*]isothiazole-3-carboxylate 1,1-dioxide (**3aj**)

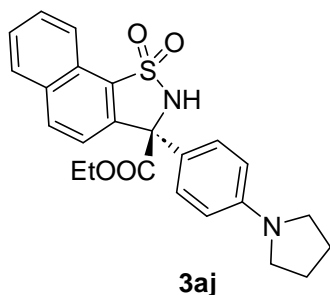

59 mg, white solid, m. p. = 208-210 °C. **90% yield**, **99% ee** (silica gel, petroleum ether : ethyl acetate=5:1).

$[\alpha]_D^{20} \quad -29.79$  (c = 1.00, CHCl<sub>3</sub>).

$^1\text{H}$  NMR (400 MHz, Chloroform-*d*)  $\delta$  8.43 (d,  $J = 8.2$  Hz, 1H), 8.03 (d,  $J = 8.7$  Hz, 1H), 7.94 (d,  $J = 8.1$  Hz, 1H), 7.74 – 7.61 (m, 3H), 7.16 (d,  $J = 8.7$  Hz, 2H), 6.47 (d,  $J = 8.8$  Hz, 2H), 6.07 (s, 1H), 4.40 – 4.31 (m, 2H), 3.26 – 3.20 (m, 4H), 2.00 – 1.93 (m, 4H), 1.32 (t,  $J = 7.1$  Hz, 3H).

$^{13}\text{C}$   $\{^1\text{H}\}$  NMR (100 MHz, Chloroform-*d*)  $\delta$  169.8, 148.0, 137.4, 133.9, 133.7, 130.7, 129.1, 128.5, 128.2, 127.6, 125.1, 123.3, 123.2, 111.6, 71.2, 63.6, 47.5, 25.5, 14.1.

HRMS (ESI)  $m/z$ :  $[\text{M}+\text{H}]^+$  calcd for  $\text{C}_{24}\text{H}_{27}\text{N}_2\text{O}_4\text{S}^+$  437.1530; Found 437.1522.

HPLC The ee value was determined by chiral HPLC analysis (Chiralcel OD-H, hexane/*i*-PrOH = 80/20, flow rate = 1.0 mL/min,  $\lambda = 220$  nm). Retention times:  $t_{\text{R}} = 13.0$  min for (*S*)-isomer and  $t_{\text{R}} = 18.7$  min for (*R*)-isomer.

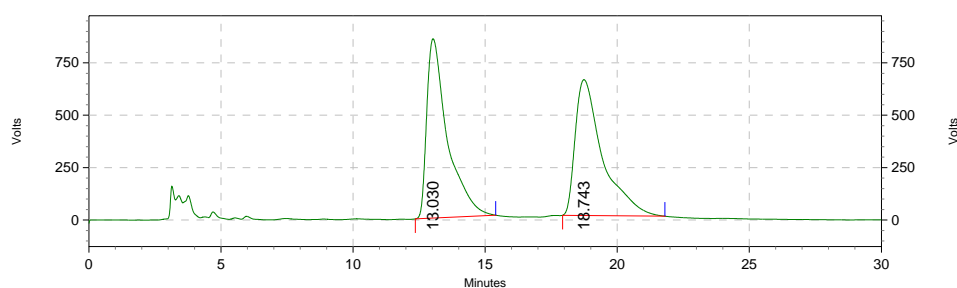

| Peaks | Ret. Time | Area     | Area%  |
|-------|-----------|----------|--------|
| 1     | 13.030    | 46352705 | 49.976 |
| 2     | 18.743    | 26518911 | 50.024 |

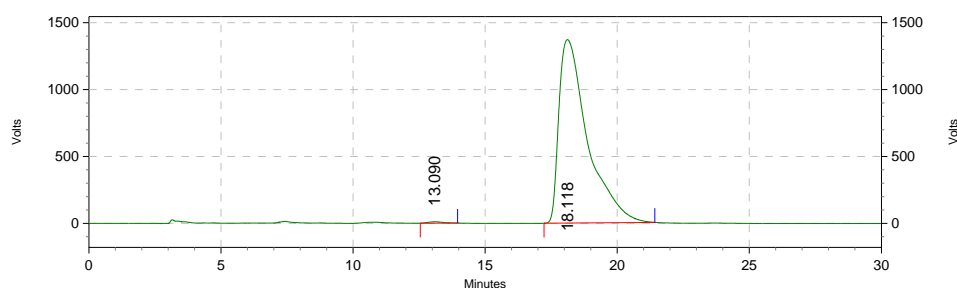

| Peaks | Ret. Time | Area      | Area%  |
|-------|-----------|-----------|--------|
| 1     | 13.030    | 237243    | 0.565  |
| 2     | 18.743    | 103725301 | 99.435 |

(*R*)-Ethyl-3-(4-(pyrrolidin-1-yl)phenyl)-2,3-dihydronaphtho[2,3-*d*]isothiazole-3-carboxylate 1,1-dioxide (**3ak**)

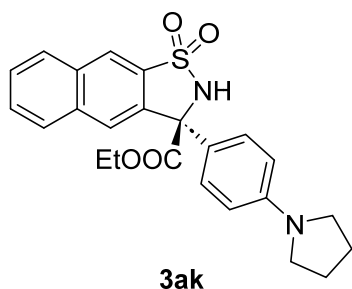

56 mg, white solid, m. p. = 200-202 °C, 85% yield, 99% ee (silica gel, petroleum ether: ethyl acetate=5:1).

$[\alpha]_D^{20}$  +105.39 (c = 1.00, CHCl<sub>3</sub>).

<sup>1</sup>H NMR (400 MHz, Chloroform-*d*) δ 8.31 (s, 1H), 8.18 (s, 1H), 8.02 – 7.97 (m, 1H), 7.94 – 7.89 (m, 1H), 7.66 – 7.59 (m, 2H), 7.24 (d, J = 8.6 Hz, 2H), 6.49 (d, J = 8.8 Hz, 2H), 6.04 (s, 1H), 4.37 (q, J = 7.1 Hz, 2H), 3.28 – 3.22 (m, 4H), 2.00 – 1.94 (m, 4H), 1.33 (t, J = 7.1 Hz, 3H).

<sup>13</sup>C {<sup>1</sup>H} NMR (100 MHz, Chloroform-*d*) δ 170.1, 148.0, 135.2, 134.3, 133.7, 133.1, 129.3, 128.9, 128.1, 127.7, 127.1, 125.4, 121.6, 111.6, 71.1, 63.6, 47.6, 25.6, 14.2.

HRMS (ESI) m/z: [M+H]<sup>+</sup> calcd for C<sub>24</sub>H<sub>25</sub>N<sub>2</sub>O<sub>4</sub>S<sup>+</sup> 437.1530; Found 437.1525.

HPLC The ee value was determined by chiral HPLC analysis (Chiralcel IB, hexane/*i*-PrOH = 70/30, flow rate = 1.0 mL/min, λ = 220 nm). Retention times: t<sub>R</sub> = 14.9 min for (*S*)-isomer and t<sub>R</sub> = 16.6 min for (*R*)-isomer.

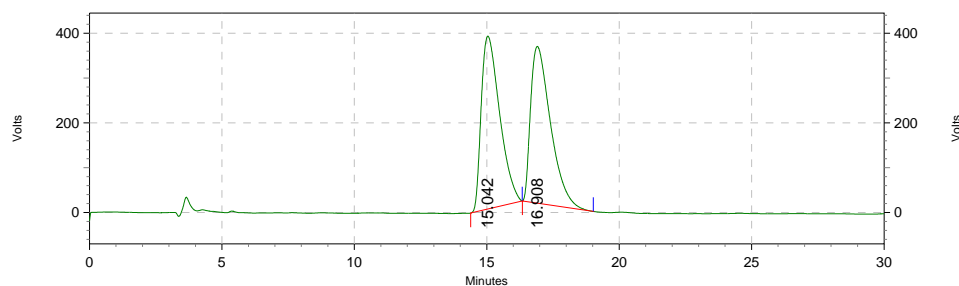

| Peaks | Ret. Time | Area     | Area%  |
|-------|-----------|----------|--------|
| 1     | 15.042    | 18611850 | 50.415 |
| 2     | 16.908    | 18305261 | 49.585 |

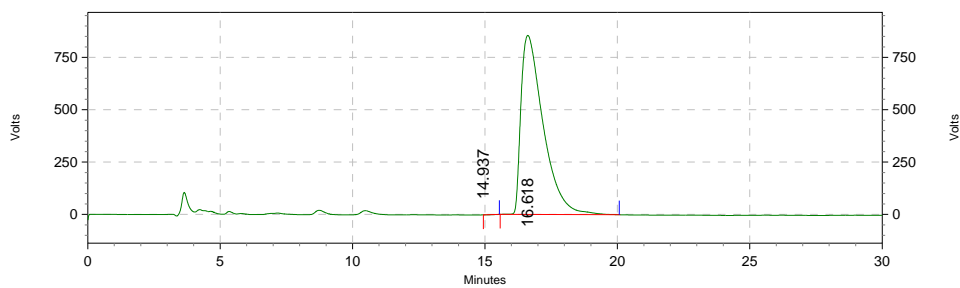

| Peaks | Ret. Time | Area     | Area%  |
|-------|-----------|----------|--------|
| 1     | 14.937    | 8024     | 0.016  |
| 2     | 16.618    | 49879571 | 99.984 |

(*R*)-Ethyl-3-(4-(dimethylamino)phenyl)-2,3-dihydrobenzo[*d*]isothiazole-3-carboxylate 1,1-dioxide (**3ba**)

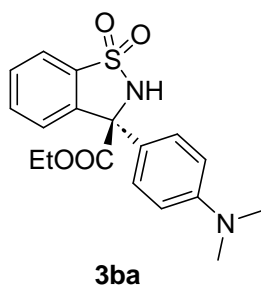

40 mg, red oil, **85% yield, 99% ee**, (silica gel, petroleum ether: ethyl acetate=5:1).

$[\alpha]_D^{20}$  + 20.62 ( $c = 1.00$ ,  $\text{CHCl}_3$ ).

$^1\text{H NMR}$  (400 MHz,  $\text{Chloroform-}d$ )  $\delta$  7.73 – 7.60 (m, 2H), 7.59 – 7.42 (m, 2H), 7.11 (d,  $J = 8.9$  Hz, 2H), 6.55 (d,  $J = 8.9$  Hz, 2H), 5.93 (s, 1H), 4.25 (q,  $J = 7.1$  Hz, 2H), 2.83 (s, 6H), 1.22 (t,  $J = 7.1$  Hz, 3H).

$^{13}\text{C} \{^1\text{H}\}$  NMR (100 MHz,  $\text{Chloroform-}d$ )  $\delta$  170.8, 150.7, 138.4, 135.6, 133.1, 130.3, 127.5, 127.5, 126.2, 121.2, 112.3, 71.1, 63.7, 40.4, 14.2.

HRMS (ESI)  $m/z$ :  $[\text{M}+\text{H}]^+$  calcd for  $\text{C}_{22}\text{H}_{23}\text{N}_2\text{O}_4\text{S}^+$  361.1217; Found 361.1226.

HPLC The ee value was determined by chiral HPLC analysis (Chiralcel IA, hexane/*i*-PrOH = 90/10, flow rate = 1.0 mL/min,  $\lambda = 220$  nm). Retention times:  $t_R = 14.8$  min for (*S*)-isomer and  $t_R = 22.4$  min for (*R*)-isomer.

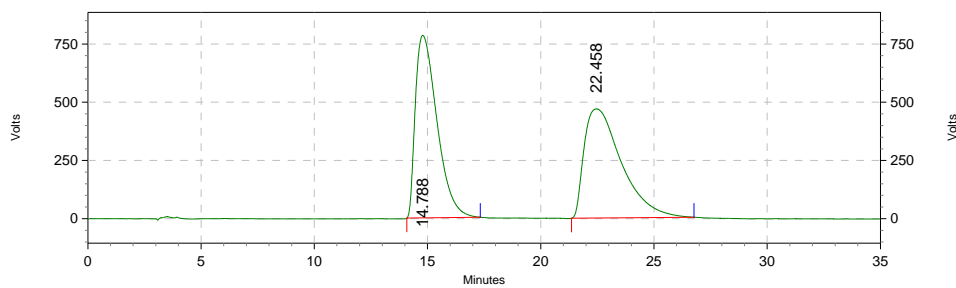

| Peaks | Ret. Time | Area     | Area%  |
|-------|-----------|----------|--------|
| 1     | 14.788    | 51998696 | 49.217 |
| 2     | 22.458    | 53652141 | 50.783 |

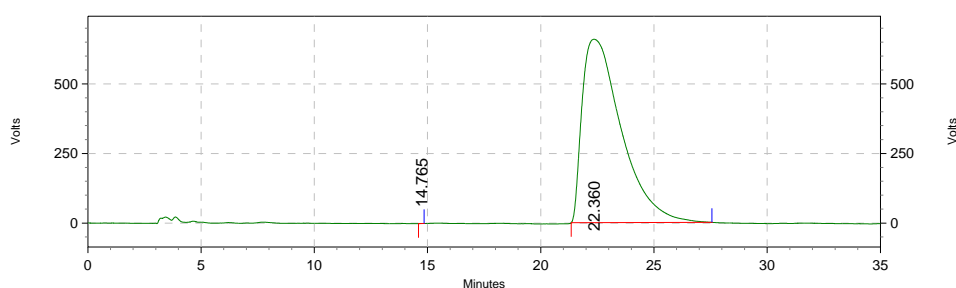

| Peaks | Ret. Time | Area     | Area%  |
|-------|-----------|----------|--------|
| 1     | 14.765    | 884      | 0.001  |
| 2     | 22.360    | 79376075 | 99.999 |

(*R*)-Ethyl-3-(4-(diethylamino)phenyl)-2,3-dihydrobenzo[*d*]isothiazole-3-carboxylate 1,1-dioxide (**3bb**)

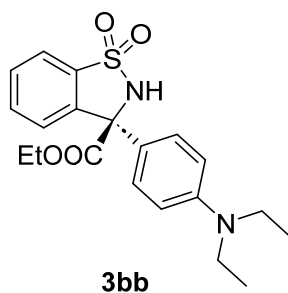

49 mg, yellow oil, **83% yield, 99% ee**; (silica gel, petroleum ether: ethyl acetate=5:1).

$[\alpha]_D^{20}$  + 22.46 ( $c = 1.00$ ,  $\text{CHCl}_3$ ).

$^1\text{H NMR}$  (400 MHz, Chloroform-*d*)  $\delta$  7.76 (d,  $J = 7.8$  Hz, 2H), 7.63 (t,  $J = 7.6$  Hz, 1H), 7.56 (t,  $J = 7.5$  Hz, 1H), 7.16 (d,  $J = 8.6$  Hz, 2H), 6.59 (d,  $J = 8.6$  Hz, 2H), 5.99 (s, 1H), 4.34 (q,  $J = 7.1$  Hz, 2H), 3.32 (q,  $J = 7.0$  Hz, 4H), 1.31

(t,  $J = 7.1$  Hz, 3H), 1.13 (t,  $J = 7.0$  Hz, 6H).

$^{13}\text{C}$   $\{^1\text{H}\}$  NMR (100 MHz, Chloroform- $d$ )  $\delta$  169.8, 147.9, 138.2, 135.4, 133.0, 130.2, 127.6, 127.5, 124.8, 120.9, 111.3, 71.1, 63.5, 44.2, 14.0, 12.5.

HRMS (ESI)  $m/z$ :  $[\text{M}+\text{H}]^+$  calcd for  $\text{C}_{20}\text{H}_{25}\text{N}_2\text{O}_4\text{S}^+$  389.1530; Found 389.1525.

HPLC The ee value was determined by chiral HPLC analysis (Chiralcel IA, hexane/ $i$ -PrOH = 80/20, flow rate = 1.0 mL/min,  $\lambda = 220$  nm). Retention times:  $t_{\text{R}} = 14.6$  min for ( $S$ )-isomer and  $t_{\text{R}} = 19.0$  min for ( $R$ )-isomer.

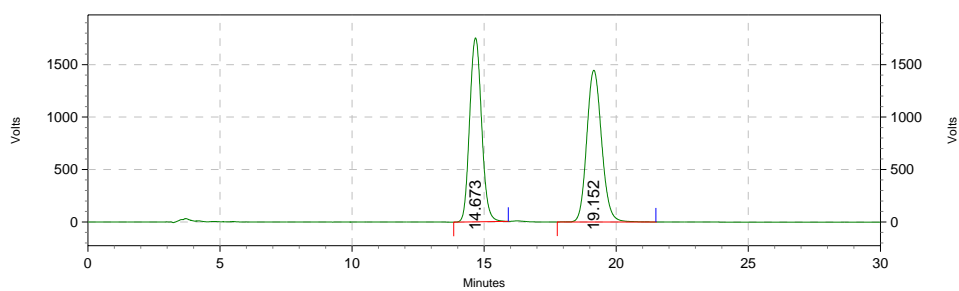

| Peaks | Ret. Time | Area     | Area%  |
|-------|-----------|----------|--------|
| 1     | 14.673    | 54888120 | 49.224 |
| 2     | 19.152    | 56618501 | 50.776 |

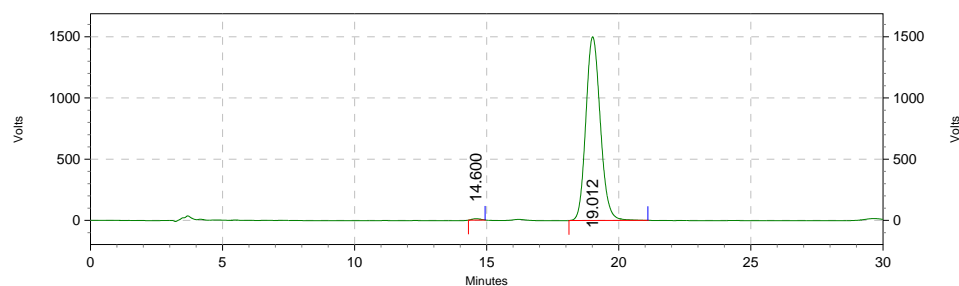

| Peaks | Ret. Time | Area     | Area%  |
|-------|-----------|----------|--------|
| 1     | 14.600    | 244471   | 0.427  |
| 2     | 19.012    | 57051854 | 99.573 |

(*R*)-Ethyl-3-(4-(diallylamino)phenyl)-2,3-dihydrobenzo[*d*]isothiazole-3-carboxylate 1,1-dioxide (**3bc**)

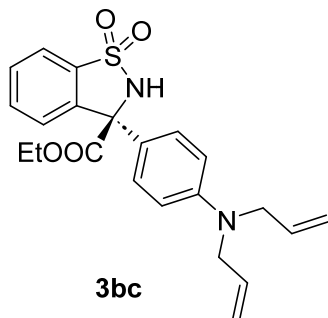

56 mg, red oil, **91% yield, 99% ee**; (silica gel, petroleum ether: ethyl acetate=5:1).

$[\alpha]_D^{20}$  + 18.47 ( $c = 1.00$ ,  $\text{CHCl}_3$ ).

$^1\text{H NMR}$  (400 MHz, Chloroform-*d*)  $\delta$  7.64 (t,  $J = 6.3$  Hz, 2H), 7.51 (t,  $J = 7.5$  Hz, 1H), 7.44 (t,  $J = 7.2$  Hz, 1H), 7.06 (d,  $J = 8.5$  Hz, 2H), 6.51 (d,  $J = 8.5$  Hz, 2H), 5.92 (s, 1H), 5.75 – 5.65 (m, 2H), 5.08 – 5.00 (m, 4H), 4.22 (q,  $J = 7.1$  Hz, 2H), 3.78 (d,  $J = 4.7$  Hz, 4H), 1.19 (t,  $J = 7.1$  Hz, 3H).

$^{13}\text{C}$  { $^1\text{H}$ } NMR (100 MHz, Chloroform-*d*)  $\delta$  169.6, 148.8, 138.1, 135.3, 133.4, 133.0, 130.2, 127.4, 125.9, 120.8, 116.1, 112.0, 70.9, 63.5, 52.6, 14.0.

HRMS (ESI)  $m/z$ :  $[\text{M}+\text{H}]^+$  calcd for  $\text{C}_{22}\text{H}_{25}\text{N}_2\text{O}_4\text{S}^+$  413.1530; Found 413.1525.

HPLC The ee value was determined by chiral HPLC analysis (Chiralcel IA, hexane/*i*-PrOH = 90/10, flow rate = 1.0 mL/min,  $\lambda = 220$  nm). Retention times:  $t_R = 31.7$  min for (*S*)-isomer and  $t_R = 36.0$  min for (*R*)-isomer.

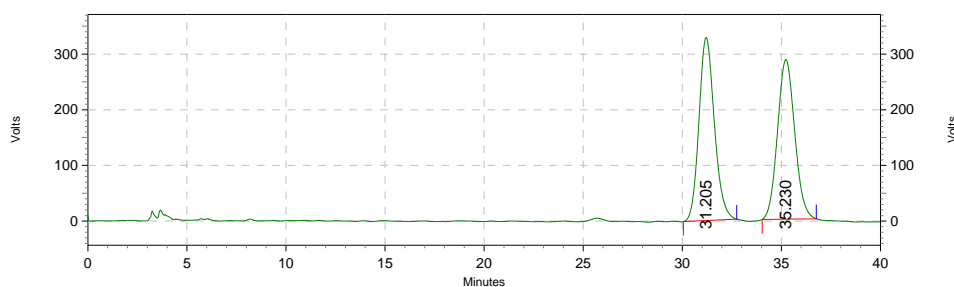

| Peaks | Ret. Time | Area     | Area%  |
|-------|-----------|----------|--------|
| 1     | 31.205    | 17785495 | 50.696 |
| 2     | 35.230    | 17297431 | 49.304 |

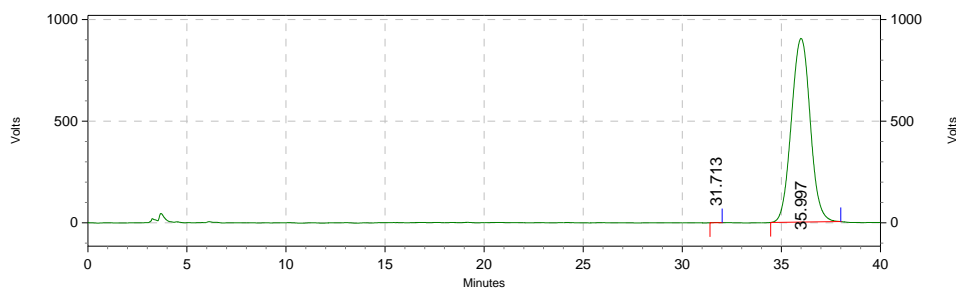

| Peaks | Ret. Time | Area     | Area%  |
|-------|-----------|----------|--------|
| 1     | 31.713    | 19930    | 0.033  |
| 2     | 35.997    | 59688467 | 99.967 |

(*R*)-Ethyl-3-(4-(dibenzylamino)phenyl)-2,3-dihydrobenzo[*d*]isothiazole-3-carboxylate 1,1-dioxide (**3bd**)

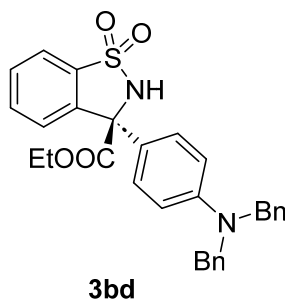

69 mg, yellow oil, **90% yield, 99% ee**; (silica gel, petroleum ether: ethyl acetate = 5:1).

$[\alpha]_{\text{D}}^{20}$  + 10.64 ( $c = 1.00$ ,  $\text{CHCl}_3$ ).

$^1\text{H NMR}$  (400 MHz, Chloroform-*d*)  $\delta$  7.62 (d,  $J = 8.0$  Hz, 2H), 7.49 (t,  $J = 7.7$  Hz, 1H), 7.43 (t,  $J = 7.6$  Hz, 1H), 7.20 (t,  $J = 7.3$  Hz, 4H), 7.16 – 7.06 (m, 6H), 7.02 (d,  $J = 8.9$  Hz, 2H), 6.55 (d,  $J = 8.9$  Hz, 2H), 5.86 (s, 1H), 4.52 (s, 4H), 4.20 (q,  $J = 7.1$  Hz, 2H), 1.17 (t,  $J = 7.1$  Hz, 3H).

$^{13}\text{C} \{^1\text{H}\}$  NMR (100 MHz, Chloroform-*d*)  $\delta$  169.6, 149.3, 138.0, 135.3, 133.0, 130.2, 128.7, 127.5, 127.4, 127.0, 126.5, 120.9, 112.3, 70.9, 63.5, 54.2, 14.0.

HRMS (ESI)  $m/z$ :  $[\text{M}+\text{H}]^+$  calcd for  $\text{C}_{30}\text{H}_{29}\text{N}_2\text{O}_4\text{S}^+$  513.1843; Found 513.1839.

HPLC The ee value was determined by chiral HPLC analysis (Chiralcel IA, hexane/*i*-PrOH = 70/30, flow rate = 1.0 mL/min,  $\lambda = 220$  nm). Retention times:  $t_{\text{R}} = 16.7$  min for (*S*)-isomer and  $t_{\text{R}} = 24.1$  min for (*R*)-isomer.



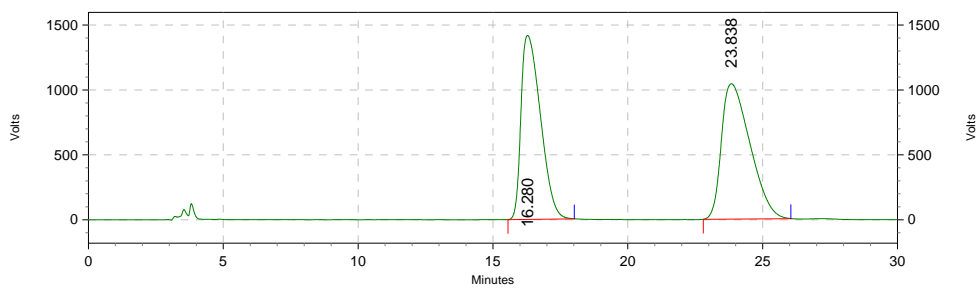

| Peaks | Ret. Time | Area     | Area%  |
|-------|-----------|----------|--------|
| 1     | 16.280    | 70970837 | 48.042 |
| 2     | 23.838    | 76754298 | 51.958 |

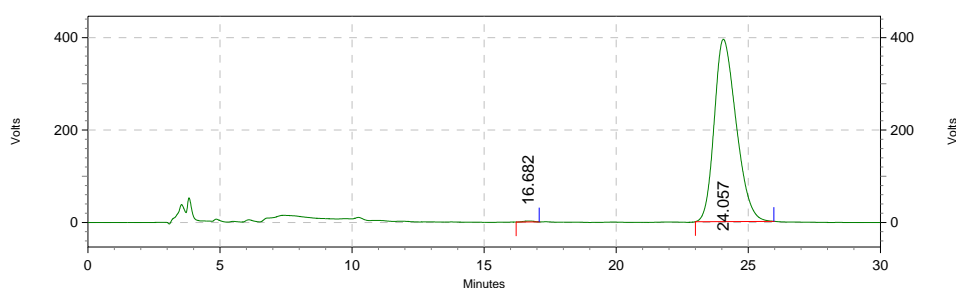

| Peaks | Ret. Time | Area     | Area%  |
|-------|-----------|----------|--------|
| 1     | 16.682    | 55207    | 0.242  |
| 2     | 24.057    | 22757216 | 99.758 |

(*R*)-Ethyl-3-(4-(benzyl(methyl)amino)phenyl)-2,3-dihydrobenzo[*d*]isothiazole-3-carboxylate 1,1-dioxide (**3be**)

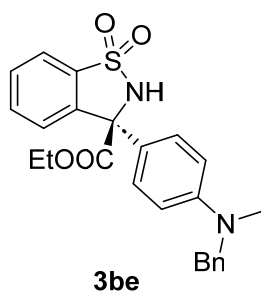

63 mg, red oil, **96% yield, 99% ee**; (silica gel, petroleum ether: ethyl acetate = 5:1).

$[\alpha]_D^{20}$  + 11.75 ( $c = 1.00$ ,  $\text{CHCl}_3$ ).

$^1\text{H NMR}$  (400 MHz,  $\text{Chloroform-}d$ )  $\delta$  7.78 – 7.70 (m, 2H), 7.64 – 7.54 (m, 2H), 7.30 (t,  $J = 7.2$  Hz, 2H), 7.25 – 7.15 (m, 5H), 6.65 (d,  $J = 8.6$  Hz, 2H), 5.94 (s, 1H), 4.51 (s, 2H), 4.33 (q,  $J = 7.1$  Hz, 2H), 3.02 (s, 3H), 1.30 (t,  $J$

= 7.1 Hz, 3H).

$^{13}\text{C}$   $\{^1\text{H}\}$  NMR (100 MHz, Chloroform-*d*)  $\delta$  169.7, 149.8, 138.5, 138.2, 135.5, 133.1, 130.3, 128.7, 127.5, 127.5, 127.1, 126.6, 126.2, 121.1, 112.1, 71.1, 63.6, 56.4, 38.7, 14.1.

HRMS (ESI)  $m/z$ :  $[\text{M}+\text{H}]^+$  calcd for  $\text{C}_{24}\text{H}_{26}\text{N}_2\text{O}_4\text{S}^+$  437.1530; Found 437.1526.

HPLC The ee value was determined by chiral HPLC analysis (Chiralcel IA, hexane/*i*-PrOH = 70/30, flow rate = 1.0 mL/min,  $\lambda$  = 220 nm). Retention times:  $t_{\text{R}}$  = 14.9 min for (*S*)-isomer and  $t_{\text{R}}$  = 18.6 min for (*R*)-isomer.

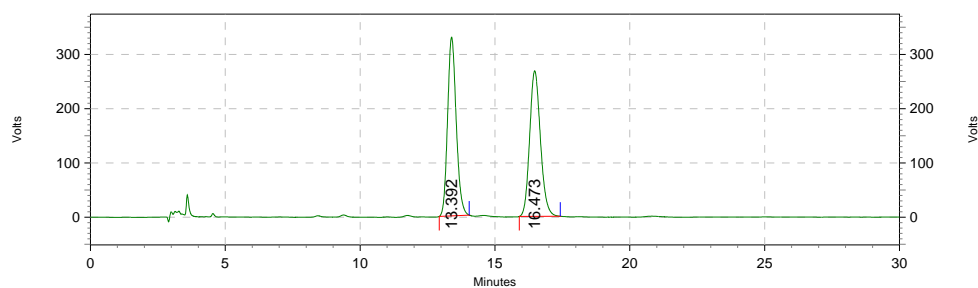

| Peaks | Ret. Time | Area    | Area%  |
|-------|-----------|---------|--------|
| 1     | 13.392    | 7335557 | 49.612 |
| 2     | 16.473    | 7450185 | 50.388 |

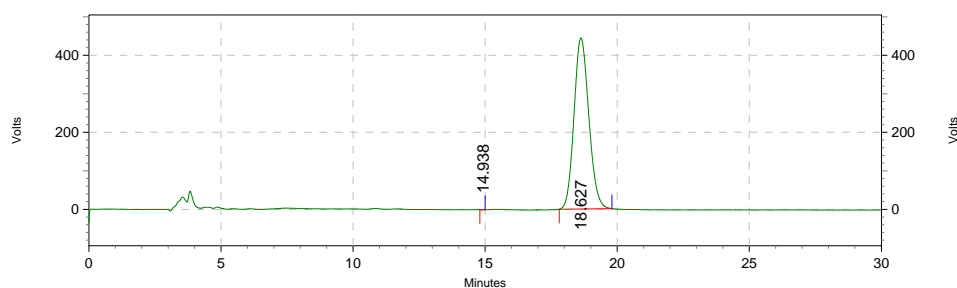

| Peaks | Ret. Time | Area     | Area%  |
|-------|-----------|----------|--------|
| 1     | 14.938    | 247      | 0.001  |
| 2     | 18.627    | 17317079 | 99.999 |

(*R*)-Ethyl-3-(4-(dimethylamino)-2-methylphenyl)-2,3-dihydrobenzo[*d*]isothiazole-3-carboxylate 1,1-dioxide (**3bf**)

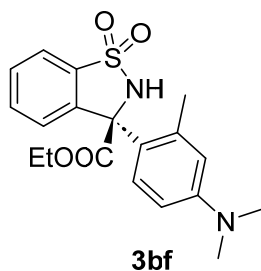

45 mg, red oil, **79% yield, 99% ee**; (silica gel, petroleum ether: ethyl acetate = 5:1).

$[\alpha]_D^{20}$  + 62.53 (c = 1.00, CHCl<sub>3</sub>).

<sup>1</sup>H NMR (400 MHz, Chloroform-*d*) δ 7.82 (d, *J* = 7.4 Hz, 1H), 7.67 (d, *J* = 14.3 Hz, 3H), 6.55 (d, *J* = 7.0 Hz, 2H), 6.35 (d, *J* = 8.4 Hz, 1H), 6.10 (s, 1H), 4.42 – 4.28 (m, 2H), 2.92 (s, 6H), 2.22 (s, 3H), 1.29 (s, 3H).

<sup>13</sup>C {<sup>1</sup>H} NMR (100 MHz, Chloroform-*d*) δ 171.2, 150.6, 138.8, 138.0, 137.1, 132.9, 130.6, 128.9, 127.1, 124.4, 121.5, 116.0, 108.9, 71.6, 63.9, 40.2, 20.7, 14.1.

HRMS (ESI) *m/z*: [M+H]<sup>+</sup> calcd for C<sub>22</sub>H<sub>23</sub>N<sub>2</sub>O<sub>4</sub>S<sup>+</sup> 375.1374; Found 375.1368.

HPLC The ee value was determined by chiral HPLC analysis (Chiralcel IA, hexane/*i*-PrOH = 70/30, flow rate = 1.0 mL/min, λ = 220 nm). Retention times: *t*<sub>R</sub> = 22.1 min for (*S*)-isomer and *t*<sub>R</sub> = 26.9 min for (*R*)-isomer.

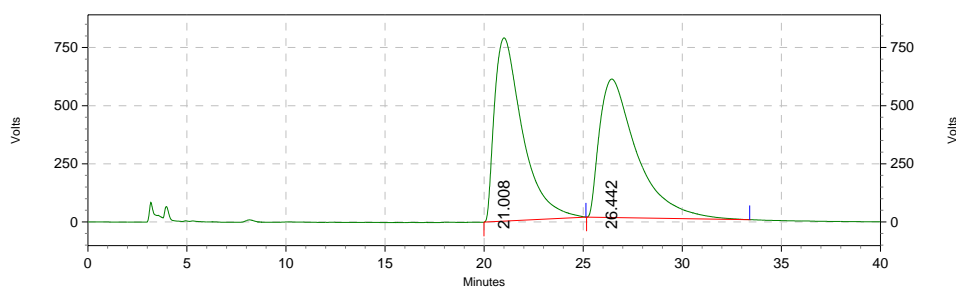

| Peaks | Ret. Time | Area     | Area%  |
|-------|-----------|----------|--------|
| 1     | 21.008    | 77746141 | 49.821 |
| 2     | 26.442    | 78305102 | 50.179 |

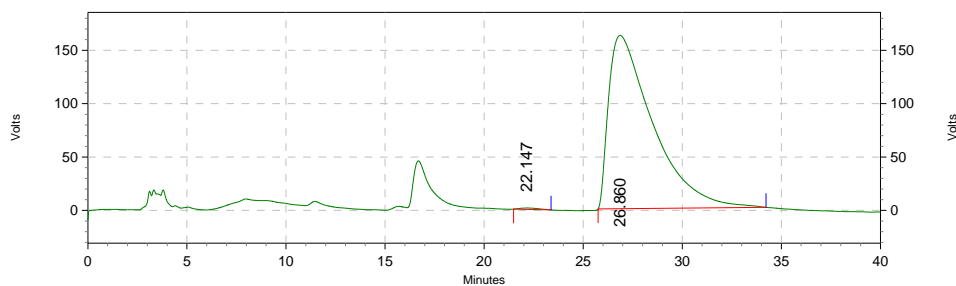

| Peaks | Ret. Time | Area     | Area%  |
|-------|-----------|----------|--------|
| 1     | 22.147    | 89419    | 0.354  |
| 2     | 26.860    | 25170488 | 99.646 |

(*R*)-Ethyl-3-(4-(dimethylamino)-2-methoxyphenyl)-2,3-dihydrobenzo[*d*]isothiazole-3-carboxylate 1,1-dioxide (**3bg**)

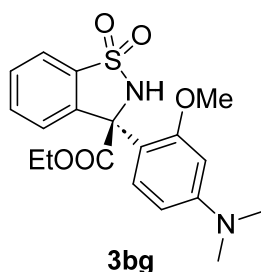

50 mg, yellow oil, **86% yield, 99% ee**; (silica gel, petroleum ether: ethyl acetate = 5:1).

$[\alpha]_D^{20}$  + 169.32 (c = 1.00, CHCl<sub>3</sub>).

<sup>1</sup>H NMR (400 MHz, Chloroform-*d*) δ 7.83 (d, J = 7.2 Hz, 1H), 7.71 – 7.61 (m, 3H), 6.48 (d, J = 8.6 Hz, 1H), 6.23 (d, J = 2.1 Hz, 1H), 6.16 (s, 1H), 6.11 – 6.07 (m, 1H), 4.31 – 4.24 (m, 2H), 3.83 (s, 3H), 2.94 (s, 6H), 1.25 (t, J = 7.1 Hz, 3H).

<sup>13</sup>C {<sup>1</sup>H} NMR (100 MHz, Chloroform-*d*) δ 171.1, 158.0, 152.4, 137.1, 132.9, 130.6, 128.4, 127.0, 121.7, 103.8, 95.9, 69.2, 63.3, 55.4, 40.5, 14.2.

HRMS (ESI) m/z: [M+H]<sup>+</sup> calcd for C<sub>19</sub>H<sub>23</sub>N<sub>2</sub>O<sub>5</sub>S<sup>+</sup> 391.1323; Found 391.1319.

HPLC The ee value was determined by chiral HPLC analysis (Chiralcel IA, hexane/*i*-PrOH = 90/10, flow rate = 1.0 mL/min, λ = 220 nm). Retention times: t<sub>R</sub> = 44.0 min for (*S*)-isomer and t<sub>R</sub> = 50.9 min for (*R*)-isomer.

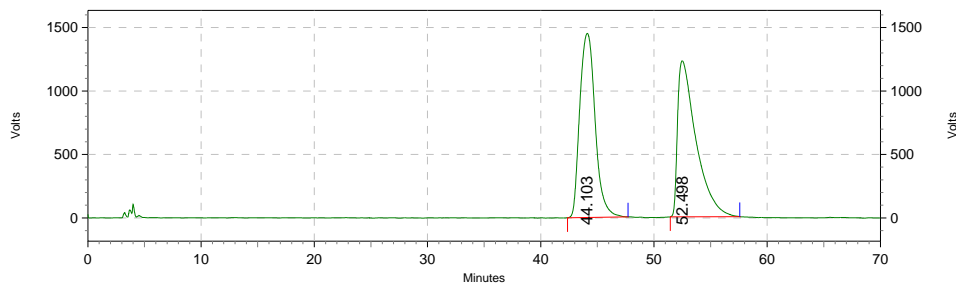

| Peaks | Ret. Time | Area      | Area%  |
|-------|-----------|-----------|--------|
| 1     | 44.103    | 136457581 | 49.536 |
| 2     | 52.498    | 139012829 | 50.464 |

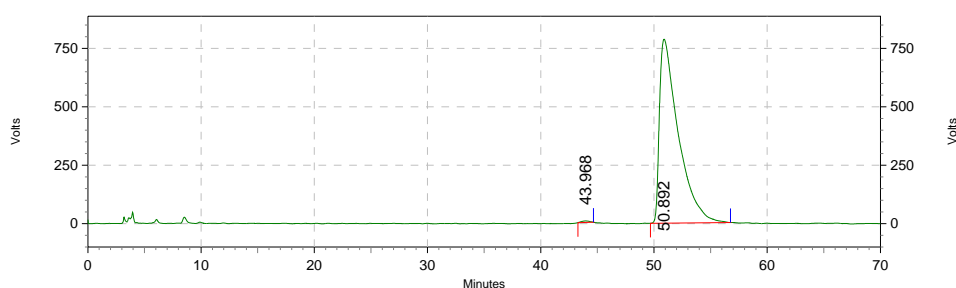

| Peaks | Ret. Time | Area     | Area%  |
|-------|-----------|----------|--------|
| 1     | 43.968    | 322341   | 0.353  |
| 2     | 50.892    | 90941898 | 99.647 |

(*R*)-Ethyl-3-(2-chloro-4-(dimethylamino)phenyl)-2,3-dihydrobenzo[*d*]isothiazole-3-carboxylate 1,1-dioxide (**3bh**)

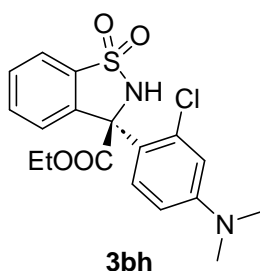

30 mg, yellow oil, **50% yield, 98% ee**; (silica gel, petroleum ether: ethyl acetate = 5:1).

$[\alpha]_D^{20}$  + 42.09 ( $c = 1.00$ ,  $\text{CHCl}_3$ ).

$^1\text{H NMR}$  (400 MHz, Chloroform-*d*)  $\delta$  7.84 (d,  $J = 7.0$  Hz, 1H), 7.71 – 7.65 (m, 3H), 6.72 (d,  $J = 2.1$  Hz, 1H), 6.52 (d,  $J = 8.8$  Hz, 1H), 6.36 – 6.32 (m, 1H), 6.28 (s, 1H), 4.38 – 4.29 (m, 2H), 2.91 (s, 6H), 1.29 (t,  $J = 7.1$  Hz, 3H).

$^{13}\text{C} \{^1\text{H}\}$  NMR (100 MHz, Chloroform-*d*)  $\delta$  170.3, 151.3, 137.4, 137.3, 134.8, 133.0,

131.0, 129.6, 126.7, 123.8, 121.8, 113.9, 109.6, 70.6, 64.1, 40.1, 14.0.

HRMS

(ESI)  $m/z$ :  $[M+H]^+$  calcd for  $C_{18}H_{20}ClN_2O_4S^+$  395.0827; Found 395.0825.

HPLC

The ee value was determined by chiral HPLC analysis (Chiralcel IA, hexane/*i*-PrOH = 70/30, flow rate = 1.0 mL/min,  $\lambda$  = 220 nm). Retention times:  $t_R$  = 13.1 min for (*S*)-isomer and  $t_R$  = 15.3 min for (*R*)-isomer.

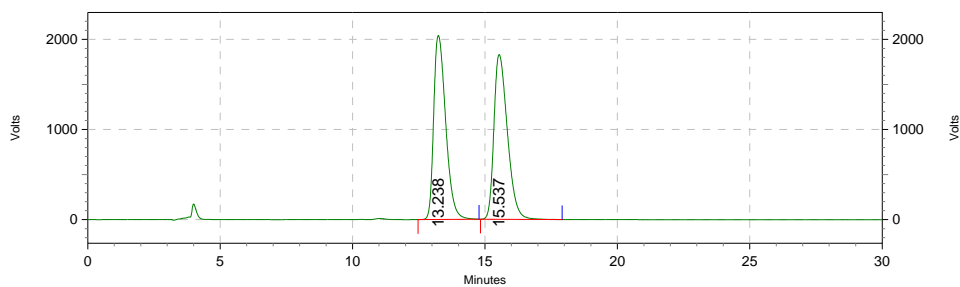

| Peaks | Ret. Time | Area     | Area%  |
|-------|-----------|----------|--------|
| 1     | 13.238    | 64340294 | 49.828 |
| 2     | 15.537    | 64785739 | 50.172 |

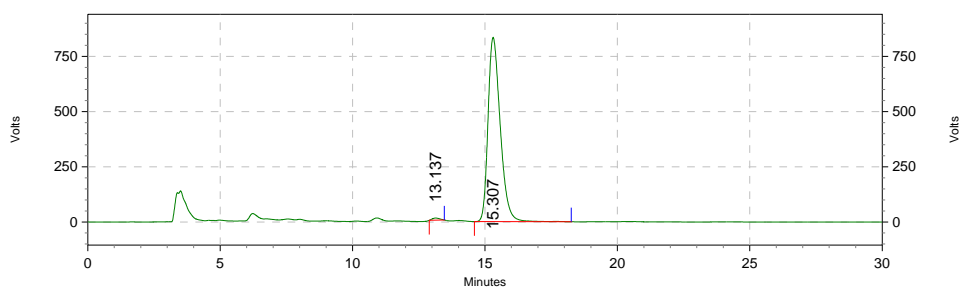

| Peaks | Ret. Time | Area     | Area%  |
|-------|-----------|----------|--------|
| 1     | 13.137    | 194755   | 0.723  |
| 2     | 15.307    | 26759602 | 99.277 |

(*R*)-Ethyl-3-(4-(piperidin-1-yl)phenyl)-2,3-dihydrobenzo[*d*]isothiazole-3-carboxylate 1,1-dioxide (**3bi**)

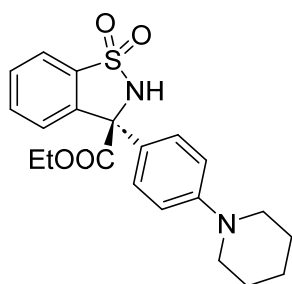

**3bi**

51 mg, yellow oil, **85% yield, 99% ee**; (silica gel, petroleum ether: ethyl acetate = 5:1).

$[\alpha]_D^{20}$  + 22.40 (c = 1.00, CHCl<sub>3</sub>).

<sup>1</sup>H NMR (400 MHz, Chloroform-*d*) δ 7.73 (t, *J* = 6.7 Hz, 2H), 7.62 (t, *J* = 7.4 Hz, 1H), 7.55 (t, *J* = 7.3 Hz, 1H), 7.20 (d, *J* = 8.4 Hz, 2H), 6.83 (d, *J* = 8.4 Hz, 2H), 6.14 (s, 1H), 4.32 (q, *J* = 7.2 Hz, 2H), 3.14 (t, *J* = 5.2 Hz, 4H), 1.68 – 1.60 (m, 4H), 1.55 (q, *J* = 5.7 Hz, 2H), 1.28 (t, *J* = 7.1 Hz, 3H).

<sup>13</sup>C {<sup>1</sup>H} NMR (100 MHz, Chloroform-*d*) δ 169.5, 151.9, 137.9, 135.2, 133.0, 130.2, 128.2, 127.2, 120.9, 115.6, 70.8, 63.5, 49.6, 25.5, 24.2, 13.9.

HRMS (ESI) *m/z*: [M+H]<sup>+</sup> calcd for C<sub>21</sub>H<sub>24</sub>N<sub>2</sub>O<sub>4</sub>S<sup>+</sup> 401.1530; Found 401.1527.

HPLC The ee value was determined by chiral HPLC analysis (Chiralcel IA, hexane/*i*-PrOH = 80/20, flow rate = 1.0 mL/min, λ = 220 nm). Retention times: *t*<sub>R</sub> = 19.8 min for (*S*)-isomer and *t*<sub>R</sub> = 29.8 min for (*R*)-isomer.

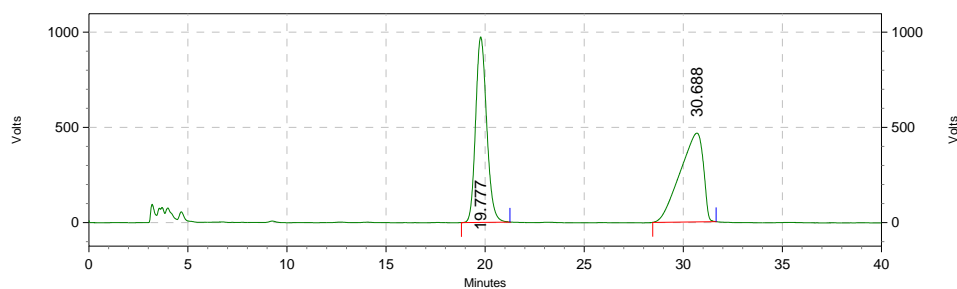

| Peaks | Ret. Time | Area     | Area%  |
|-------|-----------|----------|--------|
| 1     | 19.777    | 37774854 | 49.905 |
| 2     | 30.688    | 37918567 | 50.095 |

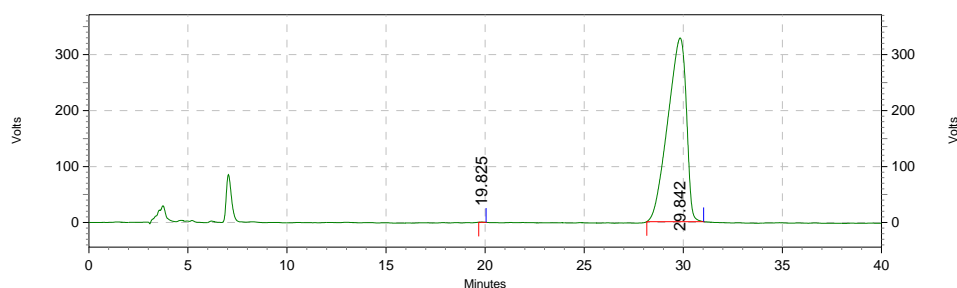

| Peaks | Ret. Time | Area     | Area%  |
|-------|-----------|----------|--------|
| 1     | 19.825    | 4760     | 0.022  |
| 2     | 29.842    | 21317035 | 99.978 |

(*R*)-Ethyl-3-(4-morpholinophenyl)-2,3-dihydrobenzo[*d*]isothiazole-3-carboxylate 1,1-dioxide  
**(3bj)**

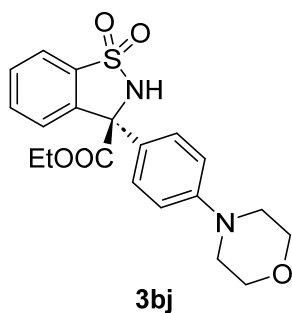

58 mg, white solid, m.p.=63-65 °C, **79% yield, 99% ee**; (silica gel, petroleum ether: ethyl acetate = 5:1).

$[\alpha]_D^{20}$  + 25.13 (c = 1.00, CHCl<sub>3</sub>).

<sup>1</sup>H NMR (400 MHz, Chloroform-*d*) δ 7.89 – 7.69 (m, 2H), 7.68 – 7.53 (m, 2H), 7.26 (d, J = 8.7 Hz, 2H), 6.83 (d, J = 8.7 Hz, 2H), 6.14 (s, 1H), 4.34 (q, J = 7.1 Hz, 2H), 3.82 (t, J = 4.8 Hz, 4H), 3.14 (t, J = 4.8 Hz, 4H), 1.31 (t, J = 7.1 Hz, 3H).

<sup>13</sup>C {<sup>1</sup>H} NMR (100 MHz, Chloroform-*d*) δ 169.5, 151.4, 137.9, 133.1, 130.4, 129.6, 127.5, 127.3, 121.1, 115.3, 70.8, 66.7, 63.7, 48.6, 14.1.

HRMS (ESI) m/z: [M+H]<sup>+</sup> calcd for C<sub>20</sub>H<sub>23</sub>N<sub>2</sub>O<sub>5</sub>S<sup>+</sup> 403.1323; Found 403.1316.

HPLC The ee value was determined by chiral HPLC analysis (Chiralcel IA, hexane/*i*-PrOH = 80/20, flow rate = 1.0 mL/min, λ = 220 nm). Retention times: t<sub>R</sub> = 28.1 min for (*S*)-isomer and t<sub>R</sub> = 42.9 min for (*R*)-isomer.

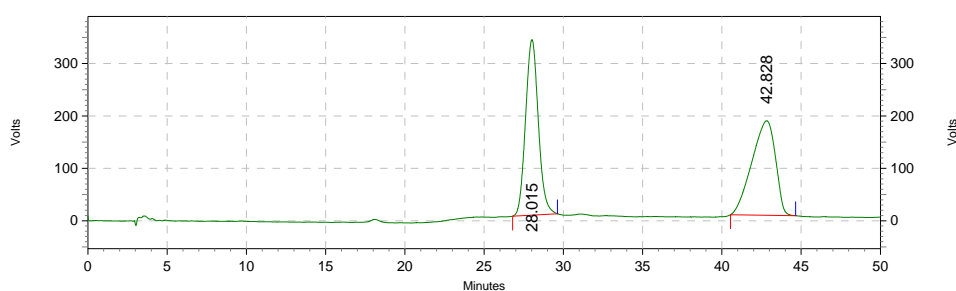

| Peaks | Ret. Time | Area     | Area%  |
|-------|-----------|----------|--------|
| 1     | 28.015    | 18728811 | 50.122 |
| 2     | 42.828    | 18637945 | 49.878 |



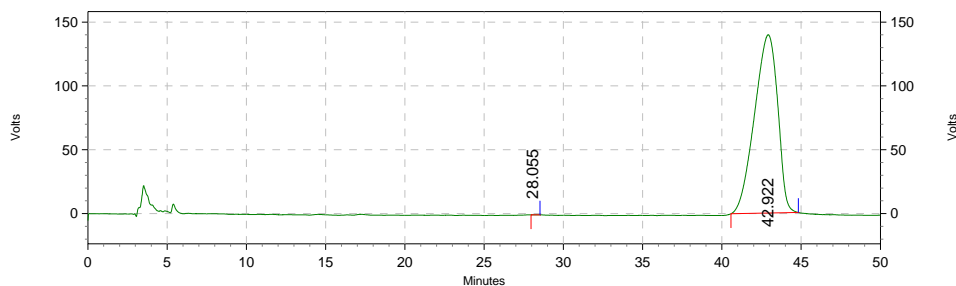

| Peaks | Ret. Time | Area     | Area%  |
|-------|-----------|----------|--------|
| 1     | 28.055    | 540      | 0.004  |
| 2     | 42.922    | 14177370 | 99.996 |

(*R*)-Ethyl-3-(4-(4-(tert-butoxycarbonyl)piperazin-1-yl)phenyl)-2,3-dihydrobenzo[*d*]isothiazole-3-carboxylate 1,1-dioxide (**3bk**)

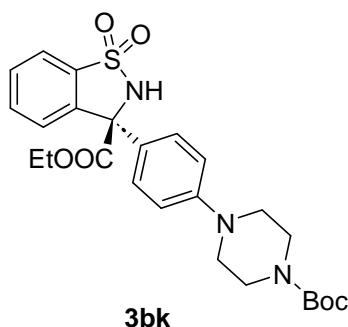

65 mg, yellow oil, **86% yield, 99% ee**; (silica gel, petroleum ether: ethyl acetate = 5:1).

$[\alpha]_D^{20}$  + 22.40 (c = 1.00, CHCl<sub>3</sub>).

<sup>1</sup>H NMR (400 MHz, Chloroform-*d*) δ 7.65 (t, *J* = 7.5 Hz, 2H), 7.55 (t, *J* = 7.5 Hz, 1H), 7.48 (t, *J* = 7.4 Hz, 1H), 7.20 – 7.14 (m, 2H), 6.75 (d, *J* = 8.7 Hz, 2H), 6.20 (s, 1H), 4.24 (q, *J* = 7.1 Hz, 2H), 3.49 – 3.41 (m, 4H), 3.07 – 2.98 (m, 4H), 1.38 (s, 9H), 1.20 (t, *J* = 7.1 Hz, 3H).

<sup>13</sup>C {<sup>1</sup>H} NMR (100 MHz, Chloroform-*d*) δ 169.3, 154.6, 151.1, 137.7, 135.3, 133.0, 130.3, 129.6, 127.3, 127.2, 120.9, 115.9, 79.9, 70.6, 63.6, 48.4, 28.3, 13.9.

HRMS (ESI) *m/z*: [M+Na]<sup>+</sup> calcd for C<sub>25</sub>H<sub>31</sub>N<sub>3</sub>O<sub>6</sub>SNa<sup>+</sup> 524.1826; Found 524.1821.

HPLC The ee value was determined by chiral HPLC analysis (Chiralcel IA, hexane/*i*-PrOH = 70/30, flow rate = 1.0 mL/min, λ = 220 nm). Retention times: *t*<sub>R</sub> = 24.4 min for (*S*)-isomer and *t*<sub>R</sub> = 30.9 min for (*R*)-isomer.

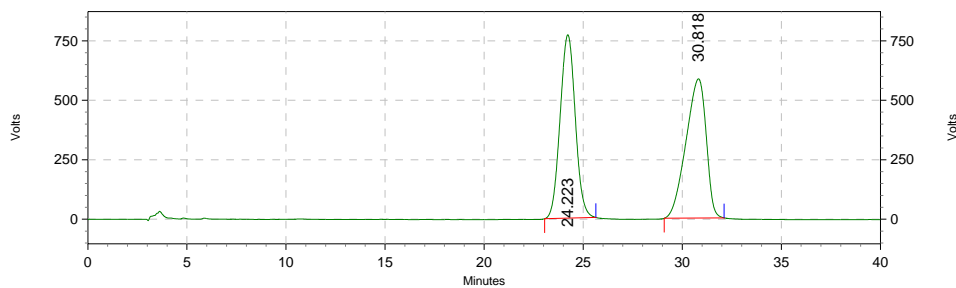

| Peaks | Ret. Time | Area     | Area%  |
|-------|-----------|----------|--------|
| 1     | 24.223    | 41010470 | 49.790 |
| 2     | 30.818    | 41356703 | 50.210 |

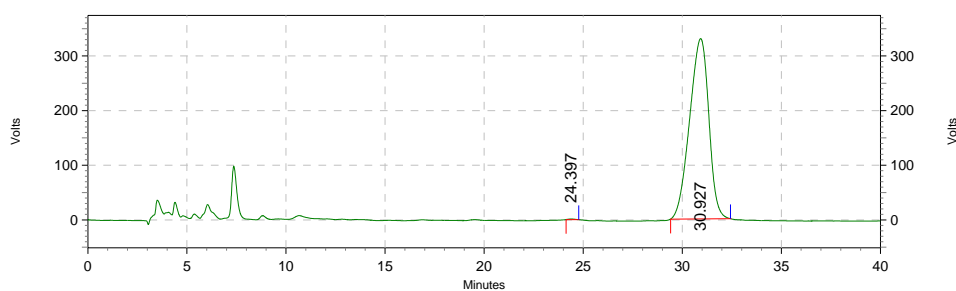

| Peaks | Ret. Time | Area     | Area%  |
|-------|-----------|----------|--------|
| 1     | 24.397    | 25527    | 0.115  |
| 2     | 30.927    | 22197900 | 99.885 |

(*R*)-Ethyl-3-(1-benzylindolin-4-yl)-2,3-dihydrobenzo[*d*]isothiazole-3-carboxylate 1,1-dioxide

**(3bl)**

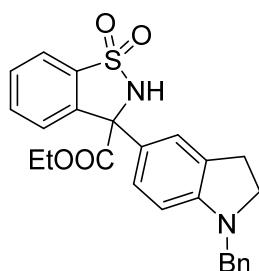

**3bl**

49 mg, yellow oil, **83% yield, 99% ee**; (silica gel, petroleum ether: ethyl acetate = 5:1).

$[\alpha]_D^{20}$  + 20.01 ( $c = 1.00$ ,  $\text{CHCl}_3$ ).

$^1\text{H NMR}$  (400 MHz, Chloroform-*d*)  $\delta$  7.74 (t,  $J = 7.1$  Hz, 2H), 7.62 (t,  $J = 7.5$  Hz, 1H), 7.56 (t,  $J = 7.5$  Hz, 1H), 7.32 – 7.22 (m, 5H), 7.03 – 6.95 (m, 2H), 6.36 (d,  $J = 8.3$  Hz, 1H), 5.99 (s, 1H), 4.32 (q,  $J = 7.1$  Hz, 2H), 4.22 (s,

2H), 3.34 (t,  $J = 8.4$  Hz, 2H), 2.91 (t,  $J = 8.4$  Hz, 2H), 1.29 (t,  $J = 7.1$  Hz, 3H).

$^{13}\text{C}$   $\{^1\text{H}\}$  NMR (100 MHz, Chloroform- $d$ )  $\delta$  169.8, 152.9, 138.1, 137.9, 133.1, 130.9, 130.3, 128.5, 127.7, 127.6, 127.5, 127.2, 125.9, 122.7, 121.0, 106.1, 71.3, 63.6, 53.4, 53.0, 28.3, 14.0.

HRMS (ESI)  $m/z$ :  $[\text{M}+\text{H}]^+$  calcd for  $\text{C}_{25}\text{H}_{24}\text{N}_2\text{O}_4\text{S}^+$  449.1530; Found 449.1523.

HPLC The ee value was determined by chiral HPLC analysis (Chiralcel IA, hexane/ $i$ -PrOH = 80/20, flow rate = 1.0 mL/min,  $\lambda = 220$  nm). Retention times:  $t_{\text{R}} = 22.3$  min for ( $S$ )-isomer and  $t_{\text{R}} = 24.7$  min for ( $R$ )-isomer.

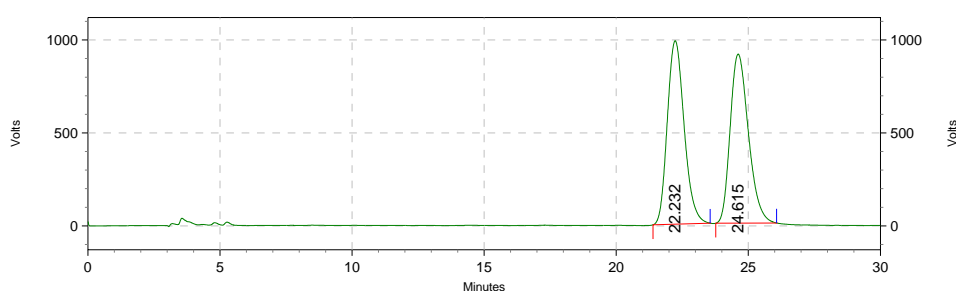

| Peaks | Ret. Time | Area     | Area%  |
|-------|-----------|----------|--------|
| 1     | 22.232    | 43673377 | 50.010 |
| 2     | 24.615    | 43656129 | 49.990 |

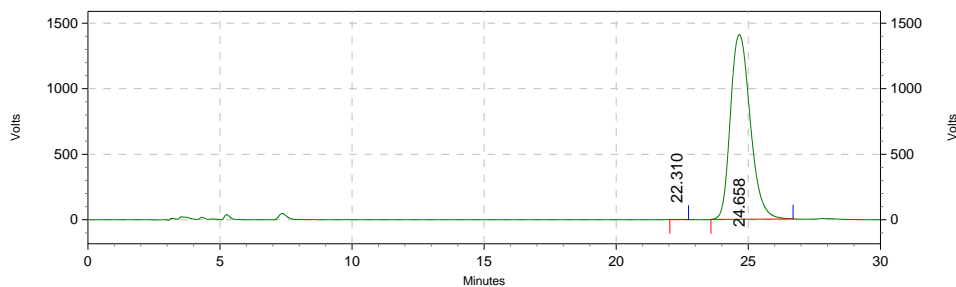

| Peaks | Ret. Time | Area     | Area%  |
|-------|-----------|----------|--------|
| 1     | 22.310    | 25422    | 0.035  |
| 2     | 24.658    | 73328602 | 99.965 |

(*R*)-Ethyl-3-(1-methyl-1,2,3,4-tetrahydroquinolin-8-yl)-2,3-dihydrobenzo[*d*]isothiazole-3-carboxylate 1,1-dioxide (**3bm**)

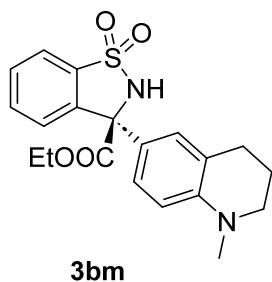

49 mg, light red oil, **88% yield, 99% ee**; (silica gel, petroleum ether: ethyl acetate = 5:1).

$[\alpha]_D^{20}$  + 21.01 (c = 1.00, CHCl<sub>3</sub>).

<sup>1</sup>H NMR (400 MHz, Chloroform-*d*) δ 7.79 – 7.69 (m, 2H), 7.66 – 7.52 (m, 2H), 6.98 (d, J = 7.8 Hz, 1H), 6.87 (s, 1H), 6.52 – 6.42 (m, 1H), 6.02 (s, 1H), 4.38 – 4.27 (m, 2H), 3.26 – 3.14 (m, 2H), 2.84 (s, 3H), 2.70 – 2.62 (m, 2H), 1.96 – 1.85 (m, 2H), 1.34 – 1.25 (m, 3H).

<sup>13</sup>C {<sup>1</sup>H} NMR (100 MHz, Chloroform-*d*) δ 169.8, 146.9, 138.1, 135.3, 133.0, 130.2, 127.5, 126.7, 125.5, 125.2, 122.9, 120.9, 110.3, 63.5, 50.9, 38.8, 27.9, 22.0, 14.0.

HRMS (ESI) m/z: [M+H]<sup>+</sup> calcd for C<sub>19</sub>H<sub>21</sub>N<sub>2</sub>O<sub>4</sub>S<sup>+</sup> 387.1374; Found 387.1366.

HPLC The ee value was determined by chiral HPLC analysis (Chiralcel IA, hexane/*i*-PrOH = 80/20, flow rate = 1.0 mL/min, λ = 220 nm). Retention times: t<sub>R</sub> = 16.0 min for (*S*)-isomer and t<sub>R</sub> = 18.3 min for (*R*)-isomer.

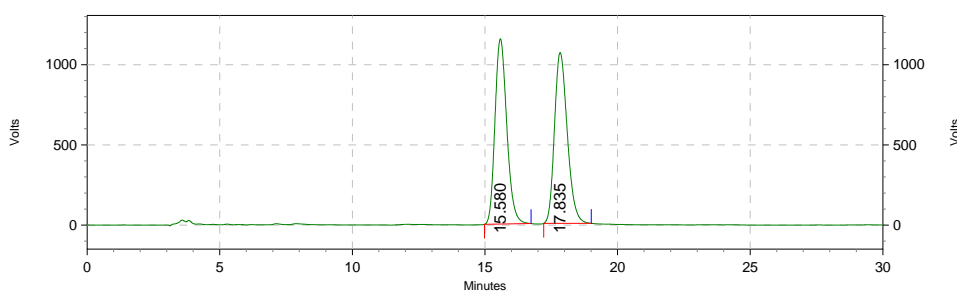

| Peaks | Ret. Time | Area     | Area%  |
|-------|-----------|----------|--------|
| 1     | 15.580    | 35721592 | 50.024 |
| 2     | 17.835    | 35687362 | 49.976 |

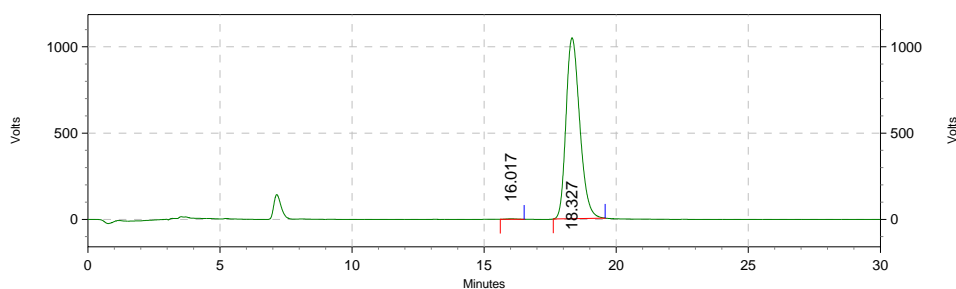

| Peaks | Ret. Time | Area     | Area%  |
|-------|-----------|----------|--------|
| 1     | 16.017    | 73575    | 0.194  |
| 2     | 18.327    | 37860717 | 99.806 |

(*R*)-Ethyl-3-(5-(dimethylamino)naphthalen-1-yl)-2,3-dihydrobenzo[*d*]isothiazole-3-carboxylate 1,1-dioxide (**3bn**)

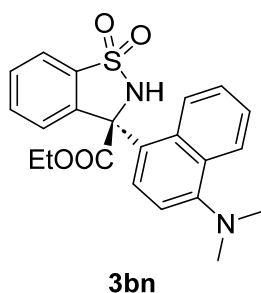

31 mg, white solid, m. p. = 190-192 °C, **50% yield, 99% ee**; (silica gel, petroleum ether: ethyl acetate = 5:1).

$[\alpha]_D^{20}$  + 136.16 (c = 1.00, CHCl<sub>3</sub>).

<sup>1</sup>H NMR (400 MHz, Chloroform-*d*) δ 8.18 (s, 1H), 7.78 – 7.71 (m, 2H), 7.68 – 7.52 (m, 3H), 7.38 (s, 2H), 6.70 (s, 2H), 6.26 (s, 1H), 4.21 – 4.06 (m, 2H), 2.73 (s, 6H), 0.97 (t, J = 8.2 Hz, 3H).

<sup>13</sup>C {<sup>1</sup>H} NMR (100 MHz, Chloroform-*d*) δ 171.4, 152.4, 138.2, 137.3, 133.0, 132.1, 130.9, 129.5, 128.2, 127.1, 126.8, 126.7, 125.4, 125.1, 123.8, 121.8, 112.2, 71.2, 64.0, 45.0, 13.8.

HRMS (ESI) m/z: [M+H]<sup>+</sup> calcd for C<sub>22</sub>H<sub>23</sub>N<sub>2</sub>O<sub>4</sub>S<sup>+</sup> 411.1374; Found 411.1368.

HPLC The ee value was determined by chiral HPLC analysis (Chiralcel IA, hexane/*i*-PrOH = 90/10, flow rate = 1.0 mL/min, λ = 220 nm). Retention times: t<sub>R</sub> = 36.5 min for (*S*)-isomer and t<sub>R</sub> = 43.0 min for (*R*)-isomer.

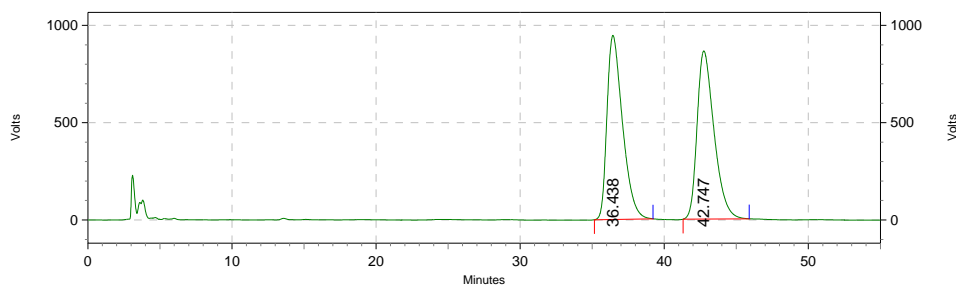

| Peaks | Ret. Time | Area     | Area%  |
|-------|-----------|----------|--------|
| 1     | 36.438    | 70911291 | 50.079 |
| 2     | 42.747    | 70686526 | 49.921 |

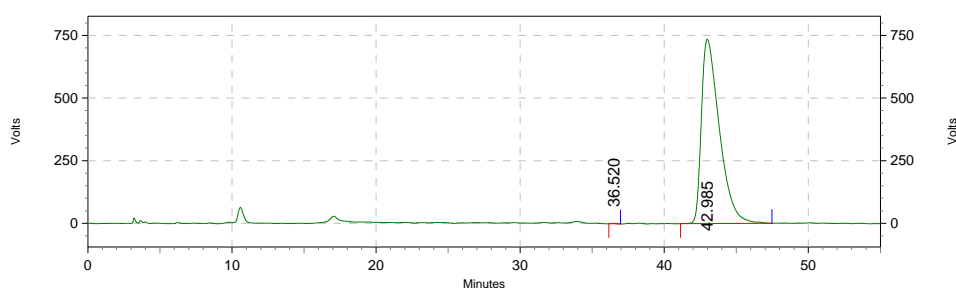

| Peaks | Ret. Time | Area     | Area%  |
|-------|-----------|----------|--------|
| 1     | 36.520    | 33597    | 0.053  |
| 2     | 42.985    | 63824147 | 99.947 |

(*R*)-Ethyl-3-(indolin-4-yl)-2,3-dihydrobenzo[*d*]isothiazole-3-carboxylate 1,1-dioxide (**3bo**)

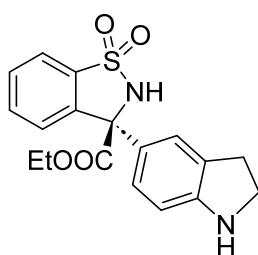

**3bo**

49 mg, yellow oil, **87% yield, 93% ee**; (silica gel, petroleum ether: ethyl acetate = 2:1).

$[\alpha]_D^{20}$  + 17.19 (*c* = 1.00, CHCl<sub>3</sub>).

<sup>1</sup>H NMR (400 MHz, Chloroform-*d*)  $\delta$  7.77 (d, *J* = 7.5 Hz, 1H), 7.72 (d, *J* = 7.8 Hz, 1H), 7.66 – 7.56 (m, 2H), 7.01 (s, 1H), 6.95 – 6.88 (m, 1H), 6.49 (d, *J* = 8.2 Hz, 1H), 4.33 (q, *J* = 7.1 Hz, 2H), 3.52 (t, *J* = 8.4 Hz, 2H), 2.93 (t, *J* = 8.4 Hz, 2H), 1.29 (t, *J* = 7.1 Hz, 3H).

$^{13}\text{C}$   $\{^1\text{H}\}$  NMR (100 MHz, Chloroform-*d*)  $\delta$  169.8, 152.2, 138.2, 135.5, 133.1, 130.4, 129.6, 128.8, 127.6, 125.9, 122.9, 121.1, 108.9, 71.4, 63.7, 47.5, 29.6, 14.1.

HRMS (ESI)  $m/z$ :  $[\text{M}+\text{H}]^+$  calcd for  $\text{C}_{18}\text{H}_{19}\text{N}_2\text{O}_4\text{S}^+$  359.1061; Found 359.1058.

HPLC The ee value was determined by chiral HPLC analysis (Chiralcel IA, hexane/*i*-PrOH = 90/10, flow rate = 1.0 mL/min,  $\lambda$  = 220 nm). Retention times:  $t_{\text{R}}$  = 17.4 min for (*S*)-isomer and  $t_{\text{R}}$  = 28.7 min for (*R*)-isomer.

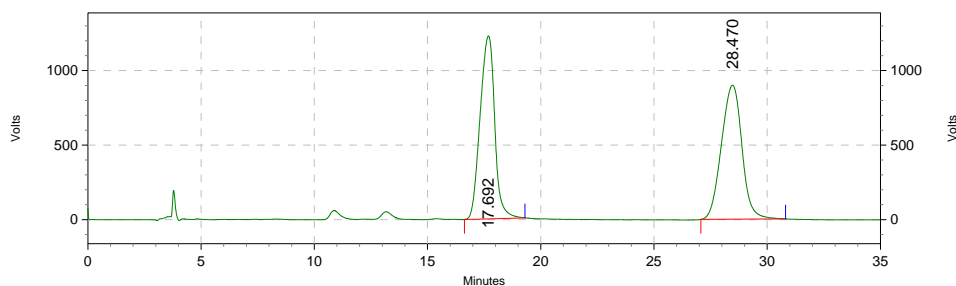

| Peaks | Ret. Time | Area     | Area%  |
|-------|-----------|----------|--------|
| 1     | 17.692    | 54789265 | 49.160 |
| 2     | 28.470    | 56662640 | 50.840 |

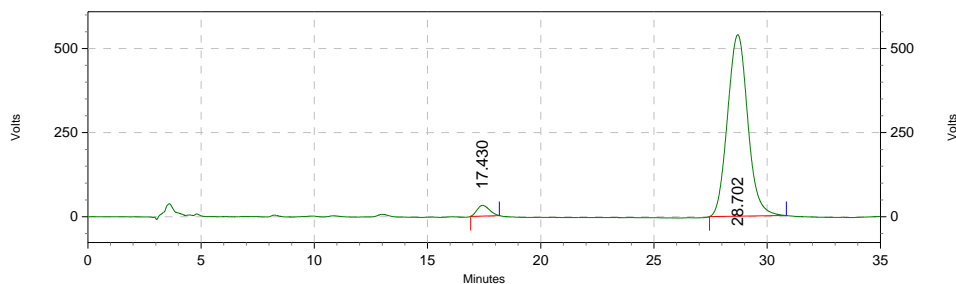

| Peaks | Ret. Time | Area     | Area%  |
|-------|-----------|----------|--------|
| 1     | 17.430    | 1196758  | 3.454  |
| 2     | 28.702    | 33454826 | 96.546 |

(*R*)-Ethyl-3-(4-(methylamino)phenyl)-2,3-dihydrobenzo[*d*]isothiazole-3-carboxylate 1,1-dioxide (**3bp**)

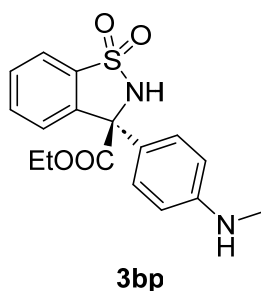

47 mg, yellow oil, **90% yield, 99% ee**; (silica gel, petroleum ether: ethyl acetate = 5:1).

$[\alpha]_D^{20}$  + 16.75 (c = 1.00, CHCl<sub>3</sub>).

<sup>1</sup>H NMR (400 MHz, Chloroform-*d*) δ 7.63 (t, J = 7.8 Hz, 2H), 7.52 (t, J = 7.4 Hz, 1H), 7.45 (t, J = 7.4 Hz, 1H), 7.01 (d, J = 8.5 Hz, 2H), 6.39 (d, J = 8.5 Hz, 2H), 6.01 (s, 1H), 4.21 (q, J = 6.9 Hz, 2H), 3.58 (s, 1H), 2.64 (s, 3H), 1.19 (t, J = 7.1 Hz, 3H).

<sup>13</sup>C {<sup>1</sup>H} NMR (100 MHz, Chloroform-*d*) δ 169.7, 149.6, 138.1, 135.3, 133.1, 130.3, 127.5, 126.8, 121.0, 112.3, 71.1, 63.6, 30.4, 14.0.

HRMS (ESI) m/z: [M+H]<sup>+</sup> calcd for C<sub>17</sub>H<sub>19</sub>N<sub>2</sub>O<sub>4</sub>S<sup>+</sup> 347.1061; Found 347.1056.

HPLC The ee value was determined by chiral HPLC analysis (Chiralcel IA, hexane/*i*-PrOH = 70/30, flow rate = 1.0 mL/min, λ = 220 nm). Retention times: t<sub>R</sub> = 15.8 min for (*S*)-isomer and t<sub>R</sub> = 23.6 min for (*R*)-isomer.

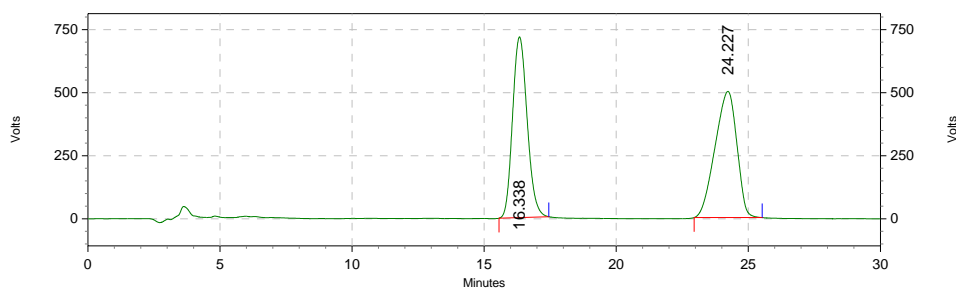

| Peaks | Ret. Time | Area     | Area%  |
|-------|-----------|----------|--------|
| 1     | 16.338    | 27471200 | 48.927 |
| 2     | 24.227    | 28675659 | 51.073 |



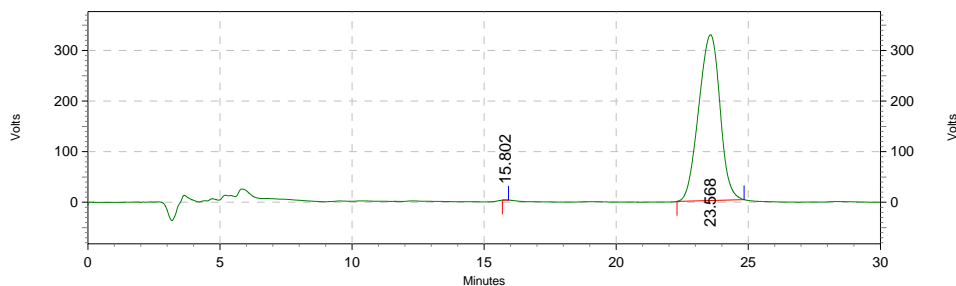

| Peaks | Ret. Time | Area     | Area%  |
|-------|-----------|----------|--------|
| 1     | 15.802    | 2809     | 0.015  |
| 2     | 23.568    | 18333258 | 99.985 |

(*R*)-Ethyl-3-(4-(ethylamino)phenyl)-2,3-dihydrobenzo[*d*]isothiazole-3-carboxylate 1,1-dioxide (**3bq**)

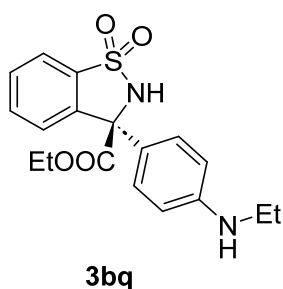

45 mg, yellow oil, **84% yield, 99% ee**; (silica gel, petroleum ether: ethyl acetate = 5:1).

$[\alpha]_D^{20}$  + 22.11 ( $c = 1.00$ ,  $\text{CHCl}_3$ ).

$^1\text{H}$  NMR (400 MHz, Chloroform-*d*)  $\delta$  7.65 – 7.60 (m, 2H), 7.51 (t,  $J = 7.5$  Hz, 1H), 7.44 (t,  $J = 7.4$  Hz, 1H), 7.00 (d,  $J = 8.6$  Hz, 2H), 6.39 (d,  $J = 8.6$  Hz, 2H), 6.01 (s, 1H), 4.21 (q,  $J = 6.9$  Hz, 2H), 2.98 (q,  $J = 7.1$  Hz, 2H), 1.17 (t,  $J = 7.1$  Hz, 3H), 1.08 (t,  $J = 7.1$  Hz, 3H).

$^{13}\text{C}$   $\{^1\text{H}\}$  NMR (100 MHz, Chloroform-*d*)  $\delta$  169.6, 148.7, 138.0, 135.2, 133.0, 130.2, 127.4, 126.6, 120.8, 112.4, 71.0, 63.5, 38.1, 14.6, 13.9.

HRMS (ESI)  $m/z$ :  $[\text{M}+\text{H}]^+$  calcd for  $\text{C}_{18}\text{H}_{21}\text{N}_2\text{O}_4\text{S}^+$  361.1217; Found 361.1212.

HPLC The ee value was determined by chiral HPLC analysis (Chiralcel IA, hexane/*i*-PrOH = 70/30, flow rate = 1.0 mL/min,  $\lambda = 220$  nm). Retention times:  $t_R = 21.1$  min for (*S*)-isomer and  $t_R = 31.4$  min for (*R*)-isomer.

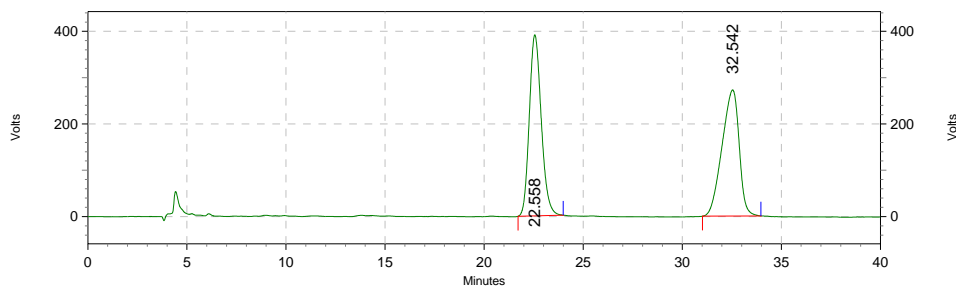

| Peaks | Ret. Time | Area     | Area%  |
|-------|-----------|----------|--------|
| 1     | 22.558    | 16362673 | 50.009 |
| 2     | 32.542    | 16357086 | 49.991 |

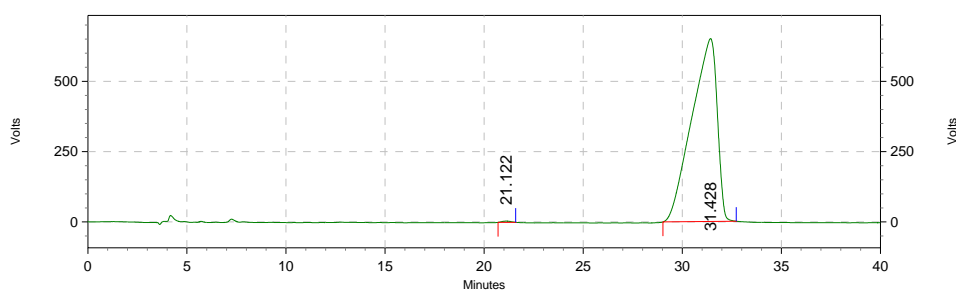

| Peaks | Ret. Time | Area     | Area%  |
|-------|-----------|----------|--------|
| 1     | 21.122    | 132701   | 0.228  |
| 2     | 31.428    | 57943226 | 99.772 |

(*R*)-Ethyl-3-(4-(benzylamino)phenyl)-2,3-dihydrobenzo[*d*]isothiazole-3-carboxylate 1,1-dioxide (**3br**)

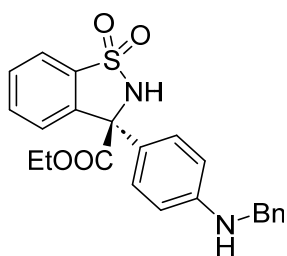

**3br**

57 mg, yellow oil, **90% yield, 99% ee**; (silica gel, petroleum ether: ethyl acetate = 5:1).

$[\alpha]_D^{20}$  + 15.55 ( $c = 1.00$ ,  $\text{CHCl}_3$ ).

$^1\text{H NMR}$  (400 MHz, Chloroform-*d*)  $\delta$  7.60 (d,  $J = 7.8$  Hz, 2H), 7.49 (t,  $J = 7.5$  Hz, 1H), 7.42 (t,  $J = 7.5$  Hz, 1H), 7.19 (d,  $J = 4.1$  Hz, 3H), 7.15 – 7.10 (m, 1H), 6.99 (d,  $J = 8.5$  Hz, 2H), 6.41 (d,  $J = 8.5$  Hz, 2H), 5.92 (s, 1H), 4.18

(q,  $J = 7.3$  Hz, 2H), 4.14 (s, 2H), 1.16 (t,  $J = 7.1$  Hz, 3H).

$^{13}\text{C}$   $\{^1\text{H}\}$  NMR (100 MHz, Chloroform- $d$ )  $\delta$  169.6, 148.4, 139.0, 138.0, 135.2, 133.0, 130.2, 128.6, 127.5, 127.4, 127.3, 127.2, 127.0, 120.9, 112.6, 71.0, 63.5, 47.8, 13.9.

HRMS (ESI)  $m/z$ :  $[\text{M}+\text{H}]^+$  calcd for  $\text{C}_{23}\text{H}_{23}\text{N}_2\text{O}_4\text{S}^+$  423.1374; Found 423.1368.

HPLC The ee value was determined by chiral HPLC analysis (Chiralcel IA, hexane/ $i$ -PrOH = 70/30, flow rate = 1.0 mL/min,  $\lambda = 220$  nm). Retention times:  $t_{\text{R}} = 22.8$  min for ( $S$ )-isomer and  $t_{\text{R}} = 29.2$  min for ( $R$ )-isomer.

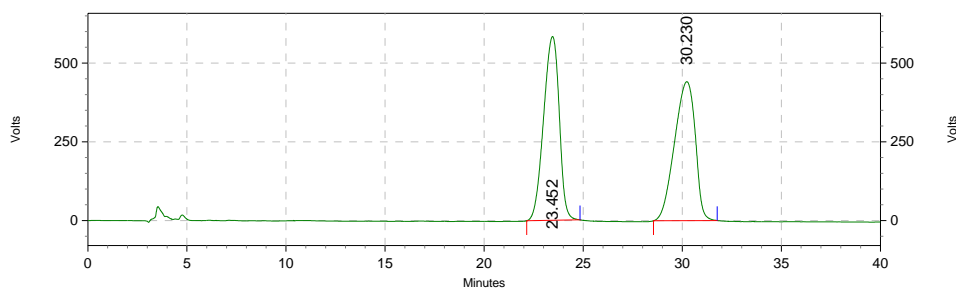

| Peaks | Ret. Time | Area     | Area%  |
|-------|-----------|----------|--------|
| 1     | 23.452    | 32019782 | 49.911 |
| 2     | 30.230    | 32133906 | 50.089 |

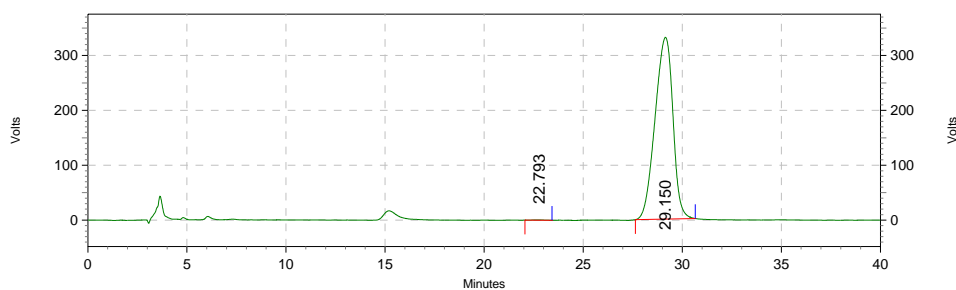

| Peaks | Ret. Time | Area     | Area%  |
|-------|-----------|----------|--------|
| 1     | 22.793    | 22303    | 0.107  |
| 2     | 29.150    | 20726737 | 99.893 |

(*R*)-Ethyl-3-(4-(phenylamino)phenyl)-2,3-dihydrobenzo[*d*]isothiazole-3-carboxylate 1,1-dioxide (**3bs**)

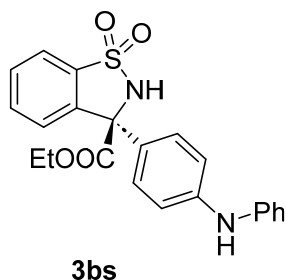

45 mg, yellow oil, **73% yield, 99% ee**; (silica gel, petroleum ether: ethyl acetate = 5:1).

$[\alpha]_D^{20}$  + 15.32 ( $c = 1.00$ ,  $\text{CHCl}_3$ ).

$^1\text{H NMR}$  (400 MHz, Chloroform-*d*)  $\delta$  7.67 – 7.61 (m, 2H), 7.52 (t,  $J = 7.5$  Hz, 1H), 7.45 (t,  $J = 7.5$  Hz, 1H), 7.20 – 7.03 (m, 5H), 6.93 (d,  $J = 7.8$  Hz, 2H), 6.85 – 6.79 (m, 3H), 6.03 (s, 1H), 5.92 (s, 1H), 4.22 (q,  $J = 7.0$  Hz, 2H), 1.18 (t,  $J = 7.1$  Hz, 3H).

$^{13}\text{C} \{^1\text{H}\}$  NMR (100 MHz, Chloroform-*d*)  $\delta$  169.5, 144.1, 142.0, 137.7, 135.3, 133.2, 130.4, 130.0, 129.3, 127.5, 127.3, 121.7, 121.1, 118.8, 116.5, 70.9, 63.8, 14.0.

HRMS (ESI)  $m/z$ :  $[\text{M}+\text{H}]^+$  calcd for  $\text{C}_{18}\text{H}_{18}\text{N}_2\text{O}_4\text{S}^+$  409.1217; Found 409.1211.

HPLC The ee value was determined by chiral HPLC analysis (Chiralcel IA, hexane/*i*-PrOH = 70/30, flow rate = 1.0 mL/min,  $\lambda = 220$  nm). Retention times:  $t_R = 17.0$  min for (*S*)-isomer and  $t_R = 31.9$  min for (*R*)-isomer.

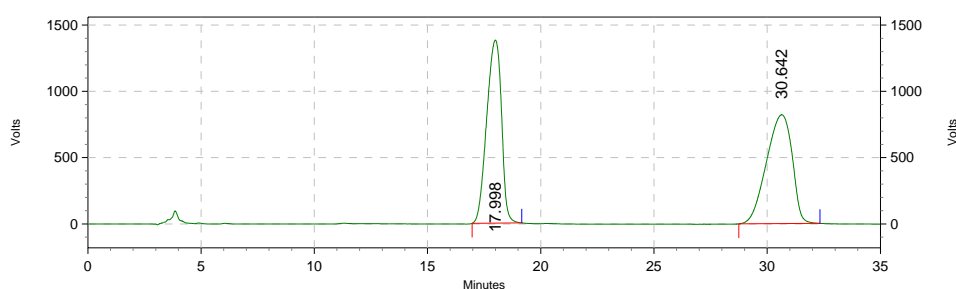

| Peaks | Ret. Time | Area     | Area%  |
|-------|-----------|----------|--------|
| 1     | 17.998    | 62634330 | 49.146 |
| 2     | 30.642    | 64811500 | 50.854 |

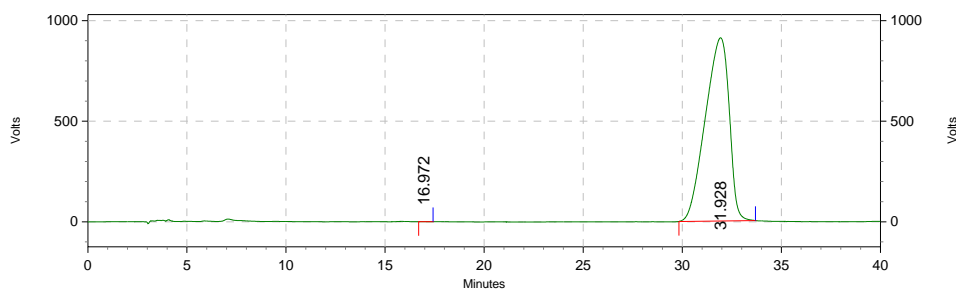

| Peaks | Ret. Time | Area     | Area%  |
|-------|-----------|----------|--------|
| 1     | 16.972    | 8518     | 0.011  |
| 2     | 31.928    | 76298196 | 99.989 |

(*R*)-methyl-3-(4-(methylamino)phenyl)-2,3-dihydrobenzo[*d*]isothiazole-3-carboxylate 1,1-dioxide (**3bt**)

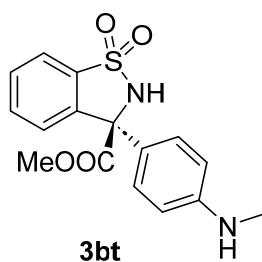

46 mg, yellow oil, **93% yield, 99% ee**; (silica gel, petroleum ether: ethyl acetate = 3:1).

$[\alpha]_D^{20}$  + 41.75 ( $c = 1.60$ ,  $\text{CHCl}_3$ ).

$^1\text{H NMR}$  (400 MHz,  $\text{Chloroform-}d$ )  $\delta$  7.70 (d,  $J = 7.5$  Hz, 1H), 7.64 (d,  $J = 7.6$  Hz, 1H), 7.59 – 7.47 (m, 2H), 7.04 (d,  $J = 8.3$  Hz, 2H), 6.45 (d,  $J = 8.3$  Hz, 2H), 5.88 (s, 1H), 3.79 (s, 3H), 2.71 (s, 3H).

$^{13}\text{C}$  { $^1\text{H}$ } (100 MHz,  $\text{Chloroform-}d$ )  $\delta$  170.3, 149.7, 138.0, 135.4, 133.2, 130.4, 127.6, 127.5, 126.9, 121.1, 112.4, 71.2, 54.2, 30.6.

HRMS (ESI)  $m/z$ :  $[\text{M}+\text{H}]^+$  calcd for  $\text{C}_{16}\text{H}_{17}\text{N}_2\text{O}_4\text{S}^+$  333.0904; Found 333.0908.

HPLC The ee value was determined by chiral HPLC analysis (Chiralcel AD-H, hexane/*i*-PrOH = 70/30, flow rate = 1.0 mL/min,  $\lambda = 220$  nm). Retention times:  $t_R = 21.0$  min for (*S*)-isomer and  $t_R = 31.5$  min for (*R*)-isomer.

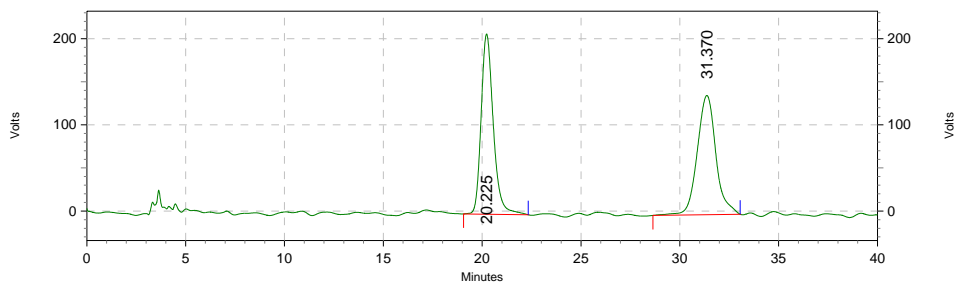

| Peaks | Ret. Time | Area    | Area%  |
|-------|-----------|---------|--------|
| 1     | 20.225    | 8968765 | 49.679 |
| 2     | 31.370    | 9084779 | 50.321 |

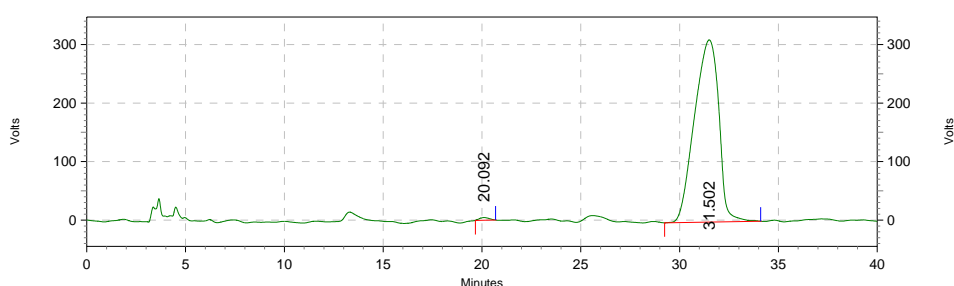

| Peaks | Ret. Time | Area     | Area%  |
|-------|-----------|----------|--------|
| 1     | 20.092    | 159246   | 0.595  |
| 2     | 31.502    | 26593352 | 99.405 |

(*R*)-2-(*tert*-butyl) 3-ethyl -7-chloro-3-(4-(pyrrolidin-1-yl)phenyl)benzo[*d*]isothiazole-2,3(*3H*)-dicarboxylate 1,1-dioxide (**4**)

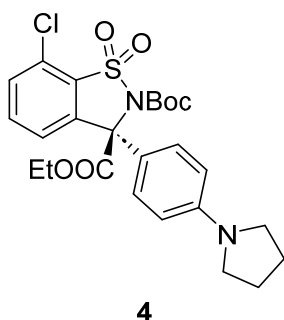

120 mg, white solid, m. p.= 186-188, °C, **96% yield, 99% ee**; (silica gel, petroleum ether: ethyl acetate = 5:1).

$[\alpha]_D^{20}$  - **90.33** (c = 1.00, CHCl<sub>3</sub>).

<sup>1</sup>H NMR (400 MHz, Chloroform-*d*) δ 7.50 (d, *J* = 4.3 Hz, 2H), 7.38 – 7.27 (m, 3H), 6.44 (d, *J* = 8.8 Hz, 2H), 4.39 – 4.30 (m, 1H), 4.17 – 4.10 (m, 1H), 3.26

(d,  $J = 6.5$  Hz, 4H), 2.01 – 1.91 (m, 4H), 1.49 (s, 9H), 1.26 (t,  $J = 7.1$  Hz, 3H).

$^{13}\text{C}$   $\{^1\text{H}\}$  NMR (100 MHz, Chloroform- $d$ )  $\delta$  167.6, 148.4, 147.5, 138.5, 134.8, 131.2, 129.3, 128.7, 124.2, 110.8, 85.1, 71.6, 63.0, 47.5, 28.1, 25.5, 14.0.

HRMS (ESI)  $m/z$ :  $[\text{M}+\text{Na}]^+$  calcd for  $\text{C}_{25}\text{H}_{30}\text{ClN}_2\text{O}_6\text{S}^+$  521.1508; Found 521.1502.

HPLC The ee value was determined by chiral HPLC analysis (Chiralcel AD-H, hexane/ $i$ -PrOH = 80/20, flow rate = 1.0 mL/min,  $\lambda = 220$  nm). Retention times:  $t_{\text{R}} = 16.7$  min for ( $S$ )-isomer and  $t_{\text{R}} = 19.8$  min for ( $R$ )-isomer.

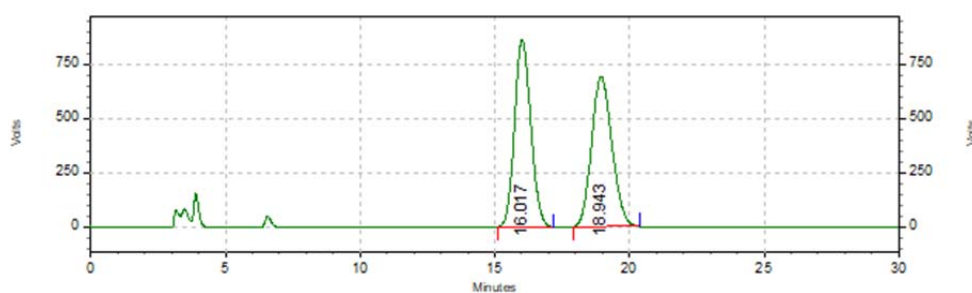

| Peaks | Ret. Time | Area     | Area%  |
|-------|-----------|----------|--------|
| 1     | 16.017    | 36014219 | 49.843 |
| 2     | 18.943    | 36241475 | 50.157 |

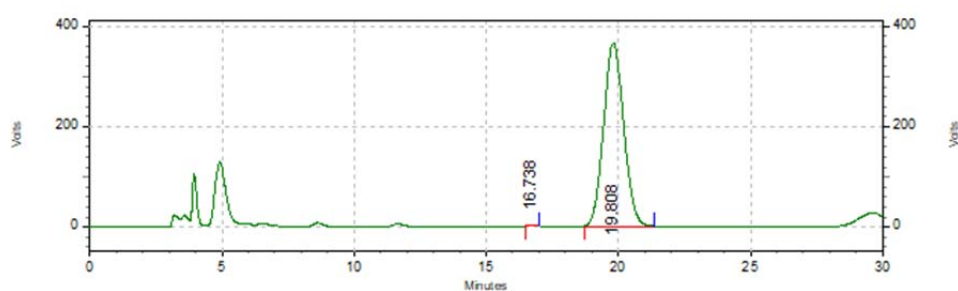

| Peaks | Ret. Time | Area     | Area%  |
|-------|-----------|----------|--------|
| 1     | 16.738    | 19161    | 0.099  |
| 2     | 19.808    | 19250366 | 99.901 |

(*R*)-Ethyl-2-benzyl-7-chloro-3-(4-(pyrrolidin-1-yl)phenyl)-2,3-dihydrobenzo[*d*]isothiazole-3-carboxylate 1,1-dioxide (**5**)

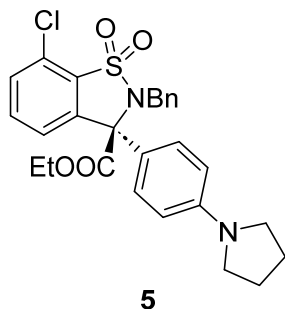

118 mg, colorless oil, **97% yield, 99% ee**; (silica gel, petroleum ether: ethyl acetate = 3:1).

$[\alpha]_D^{20}$  -41.55 (c = 1.00, CHCl<sub>3</sub>).

<sup>1</sup>H NMR (400 MHz, Chloroform-*d*) δ 7.37 (d, *J* = 4.4 Hz, 2H), 7.31 – 7.25 (m, 1H), 7.20 – 7.15 (m, 2H), 7.13 – 7.03 (m, 3H), 6.87 (d, *J* = 8.7 Hz, 2H), 6.34 (d, *J* = 8.8 Hz, 2H), 4.37 (q, 2H), 4.11 – 4.00 (m, 2H), 3.22 – 3.10 (m, 4H), 1.95 – 1.85 (m, 4H), 1.06 (t, *J* = 7.1 Hz, 3H).

<sup>13</sup>C {<sup>1</sup>H} NMR (100 MHz, Chloroform-*d*) δ 168.9, 148.0, 141.1, 136.5, 133.7, 131.9, 130.5, 129.5, 128.7, 127.9, 127.1, 125.6, 121.7, 111.4, 74.4, 62.6, 47.5, 45.5, 25.5, 13.8.

HRMS (ESI) *m/z*: [M+H]<sup>+</sup> calcd for C<sub>27</sub>H<sub>28</sub>ClN<sub>2</sub>O<sub>4</sub>S<sup>+</sup> 511.1453; Found 511.1447.

HPLC The ee value was determined by chiral HPLC analysis (Chiralcel AD-H, hexane/*i*-PrOH = 70/30, flow rate = 1.0 mL/min, λ = 220 nm). Retention times: *t*<sub>R</sub> = 21.3 min for (*S*)-isomer and *t*<sub>R</sub> = 26.8 min for (*R*)-isomer.

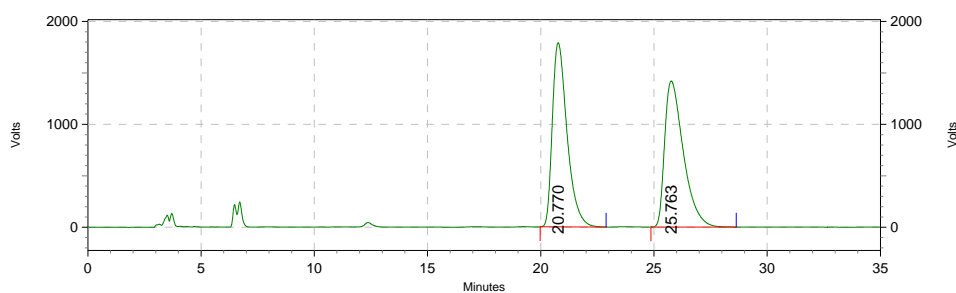

| Peaks | Ret. Time | Area     | Area%  |
|-------|-----------|----------|--------|
| 1     | 20.770    | 81027215 | 49.859 |
| 2     | 25.763    | 81484600 | 50.141 |



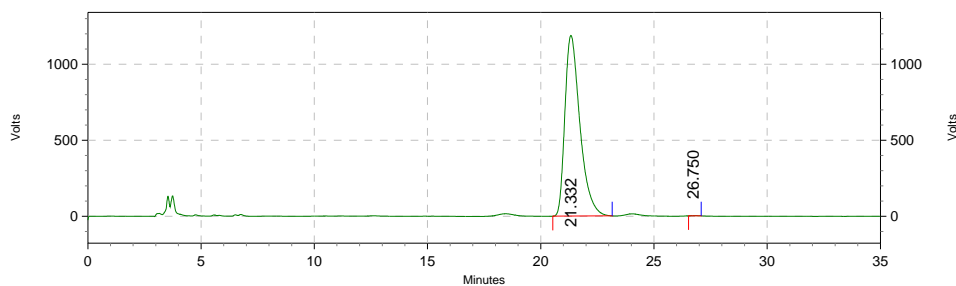

| Peaks | Ret. Time | Area     | Area%  |
|-------|-----------|----------|--------|
| 1     | 21.332    | 54888970 | 99.951 |
| 2     | 26.750    | 26667    | 0.049  |

(*R*)-3-(hydroxymethyl)-3-(4-(pyrrolidin-1-yl)phenyl)-2,3-dihydrobenzo[*d*]isothiazole 1,1-dioxide (**6**)

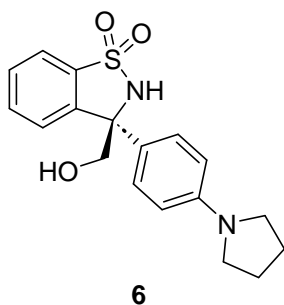

65 mg, colorless oil, **72% yield, 99% ee**, (silica gel, petroleum ether : ethyl acetate=2:1).

$[\alpha]_D^{20}$  -2.58 (c = 1.00, CHCl<sub>3</sub>).

<sup>1</sup>H NMR (400 MHz, Chloroform-*d*) δ 7.69 (d, *J* = 7.6 Hz, 1H), 7.52 – 7.41 (m, 2H), 7.20 (t, *J* = 8.9 Hz, 4H), 6.43 (d, *J* = 8.2 Hz, 2H), 5.20 (s, 1H), 4.16 (d, *J* = 11.8 Hz, 1H), 4.02 (d, *J* = 11.6 Hz, 1H), 3.16 (t, *J* = 6.2 Hz, 4H), 1.90 (t, *J* = 6.2 Hz, 4H).

<sup>13</sup>C {<sup>1</sup>H} NMR (100 MHz, Chloroform-*d*) δ 141.8, 135.9, 133.5, 129.6, 129.6, 129.6, 128.0, 125.1, 121.4, 70.0, 67.5, 25.3.

HRMS (ESI) *m/z*: [M+H]<sup>+</sup> calcd for C<sub>27</sub>H<sub>28</sub>ClN<sub>2</sub>O<sub>4</sub>S<sup>+</sup> 345.1268; Found 345.1265.

HPLC The ee value was determined by chiral HPLC analysis (Chiralcel AD-H, hexane/*i*-PrOH = 70/30, flow rate = 1.0 mL/min, λ = 220 nm). Retention times: *t*<sub>R</sub> = 18.2 min for (*S*)-isomer and *t*<sub>R</sub> = 20.7 min for (*R*)-isomer.

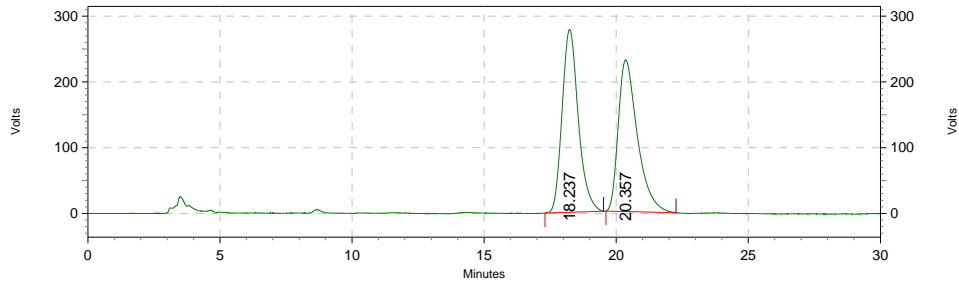

| Peaks | Ret. Time | Area     | Area%  |
|-------|-----------|----------|--------|
| 1     | 18.237    | 11848421 | 50.561 |
| 2     | 20.357    | 11585621 | 49.439 |

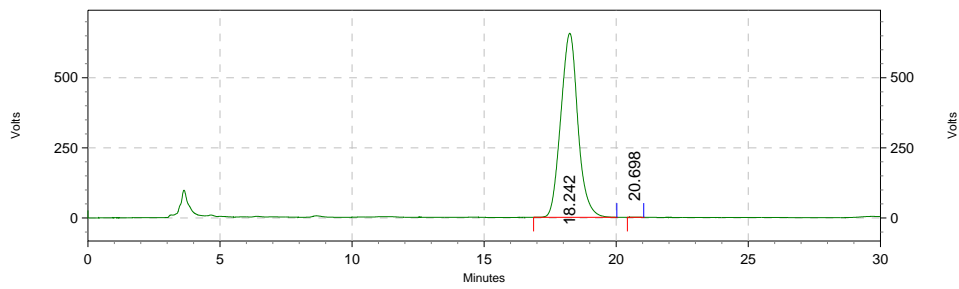

| Peaks | Ret. Time | Area     | Area%  |
|-------|-----------|----------|--------|
| 1     | 18.242    | 29513781 | 99.974 |
| 2     | 20.698    | 7738     | 0.026  |

## 4. Studies on Reaction Mechanism

### 5.1. DFT Studies on the Reaction Mechanism

Calculations were performed to get mechanistic insights into the reactions. Ligand **L6** was used for the study to reduce the cost of the calculation. N-Methylaniline (**2p**) was used as the arylamine model, and methyl ester (**1b**) was used as the electrophile model (Figure S2).

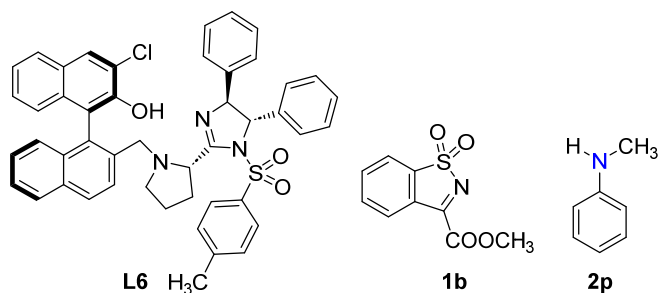

**Figure S2.** Structures used for the calculation.

The calculations were performed on a Linux platform with Gaussian G09 D01 package.<sup>3</sup> The structures of intermediates/transition states were optimized at M06L level of theory<sup>4</sup> with 6-31G(d) basis set for light atoms<sup>5</sup> and SDD for nickel.<sup>6</sup> Single point energies were calculated at M06L level of theory with 6-311G(d) basis set for light atoms<sup>5d, 5f, g, 7</sup> and LANL2TZ for nickel.<sup>8</sup> Implicit solvation model SMD<sup>9</sup> was used with dichloromethane as the solvent.

The optimized structures for the chiral ligand and the reaction intermediates were confirmed by the absence of imaginary frequency. The transition state geometries were confirmed by the presence of a single imaginary frequency in the Hessian matrix, and the reaction paths were checked by intrinsic reaction coordinate (IRC) calculations.

At first, the structure of the chiral ligand was optimized. In our previous study, we found that the nitrogen atom of the proline moiety in the ligand may adopt either an (*R*)- (denoted as **L6-N(*R*)**) or (*S*)-configuration (denoted as **L6-N(*S*)**) depending on the structures of the functional groups attached to the proline moiety.

Comparison of the energies of the optimized structures of **L6-N(*R*)** and **L6-N(*S*)** suggested that **L6-N(*S*)** was the favored structure in dichloromethane ( $\Delta G = -3.5$  kcal/mol) (Scheme S1). This is in agreement with our previous X-ray diffraction study on the structure of similar chiral ligand.<sup>1a</sup>

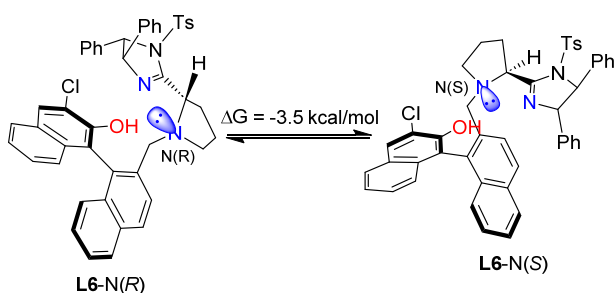

**Scheme S1.** Equilibrium between **L6-N(R)** and **L6-N(S)**

Coordination of  $\text{Ni}(\text{OTf})_2$  to **L6-N(S)** produced nickel complex  $[\text{L6-N(S)-Ni}]^+$  (**7a**) which would act as the catalyst in the reaction. This is a favored process especially in the presence of a base. Coordination of  $\text{Ni}(\text{OTf})_2$  to **L6-N(R)** to give  $[\text{Ni-L6-N(R)}]^+$  (**7b**) was also considered. But  $[\text{Ni-L6-N(S)}]^+$  (**7a**) was favored over  $[\text{Ni-L6-N(R)}]^+$  (**7b**) ( $\Delta G = -20.7$  kcal/mol).

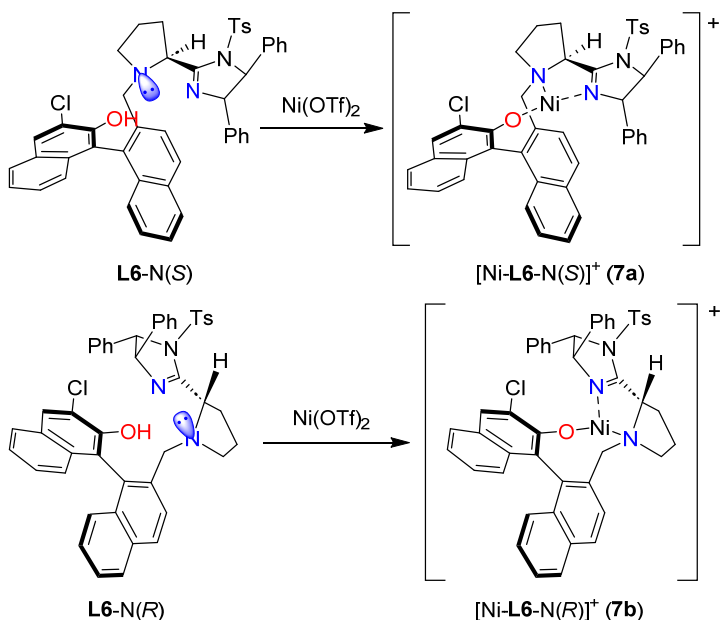

**Scheme S2.** Formation of the nickel complexes.

The interaction of **1b** with catalyst **7a** was then studied to account for the high enantioselectivity of the reactions. Coordination of the imine nitrogen atom in electrophile **1b** to the nickel atom in the catalyst produced key intermediate **8**. This process led to the activation of the electrophile **1b**, and aromatic substitution of **2p** happened at the position para- to the N-methylamino group, yielding the corresponding Friedel-Crafts product in high ee.

Different types of interactions could be expected when **1b** coordinated to **7a** with its imine nitrogen atom. In catalyst **7a**, the naphthyl group from binaphthyl moiety and one phenyl

group from the imidazoline moiety formed a narrow slot which allowed the entrance of **1b** from a special direction such that the benzene ring of **1b** was generally parallel to the phenyl group to avoid the steric repulsion between the two groups. When electrophile **1b** entered the narrow slot, the ester group (either ethoxycarbonyl or methoxycarbonyl group) could be located either inside (**8a**) or outside the slot (**8b**). In intermediate **8a**, the *Re*-face of the ketimine C=N bond was covered by the phenyl group, and the activated electrophile used its *Si*-face to react with **2q**, leading to product with (*R*)-configuration. Similarly, reaction of the *Re*-face of **8b** with **2q** provided product with (*S*)-configuration (Figure S3).

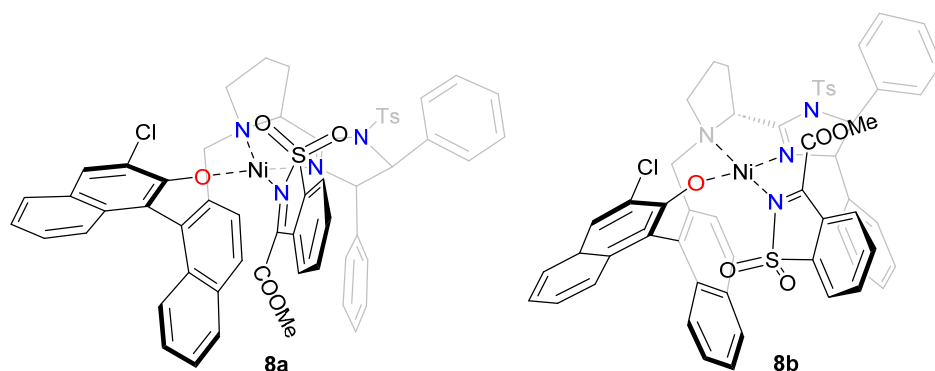

**Figure S3.** Activation of the electrophile **2p** by the catalyst.

These structures were optimized. Preliminary results suggested that both **8a** and **8b** were present in the reaction system. To our surprise, **8b** was favored over **8a** ( $\Delta G = -1.5$  kcal/mol) (Scheme S3). This result indicated that the thermodynamic properties of the key intermediates **8a** and **8b** could not account for the high stereoselectivity of the reaction.

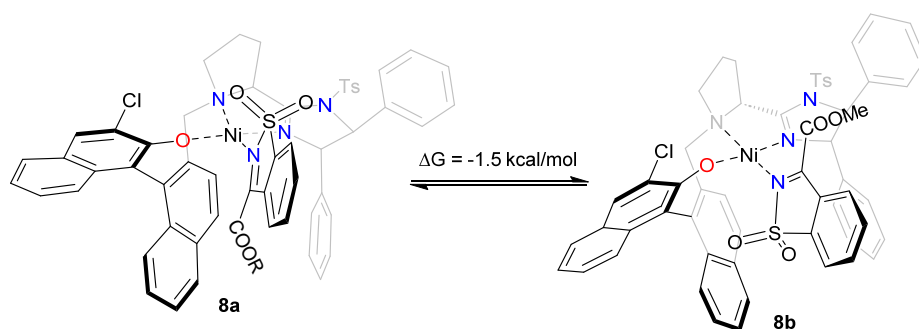

**Scheme S3.** Equilibrium between the key reaction intermediates **8a** and **8b**.

Preliminary calculations on the **8a/8b** suggested that Friedel-Crafts alkylation of **2p** could happen on both intermediates. The transition states for the Friedel-Crafts reaction of **2p** with both **8a** and **8b** were then proposed and optimized (Figures S4 and S6). The structures of the

transition states were confirmed with the presence of single imaginary frequency, and were checked with IRC calculations (Figures S5 and S7).

Calculation results at this stage suggested that reaction between **8b** and **2p** was favored over the reaction between **8a** and **2p** and the difference for the energy of **9a** and **9b** ( $\Delta\Delta G^\ddagger = 1.6$  kcal/mol). It seemed at this stage that, both the kinetic and thermodynamic issues favored the reaction between **8b** and **2p**, and the product should be obtained with (*S*)-configuration rather than the experimentally observed (*R*)-configuration.

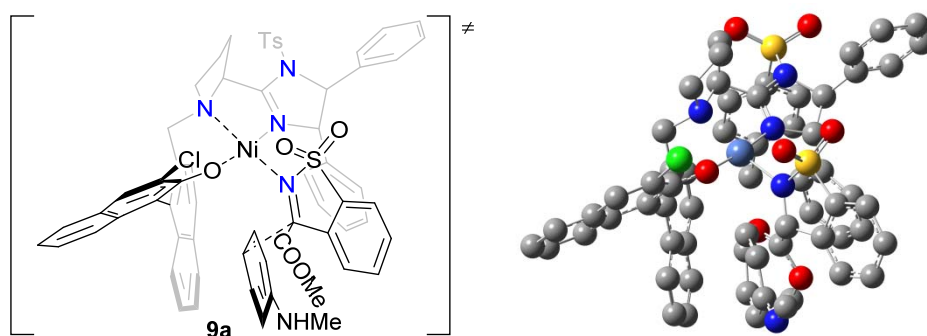

**Figure 4.** Optimized structure and model for transition state of *Si*-attack (**9a**).

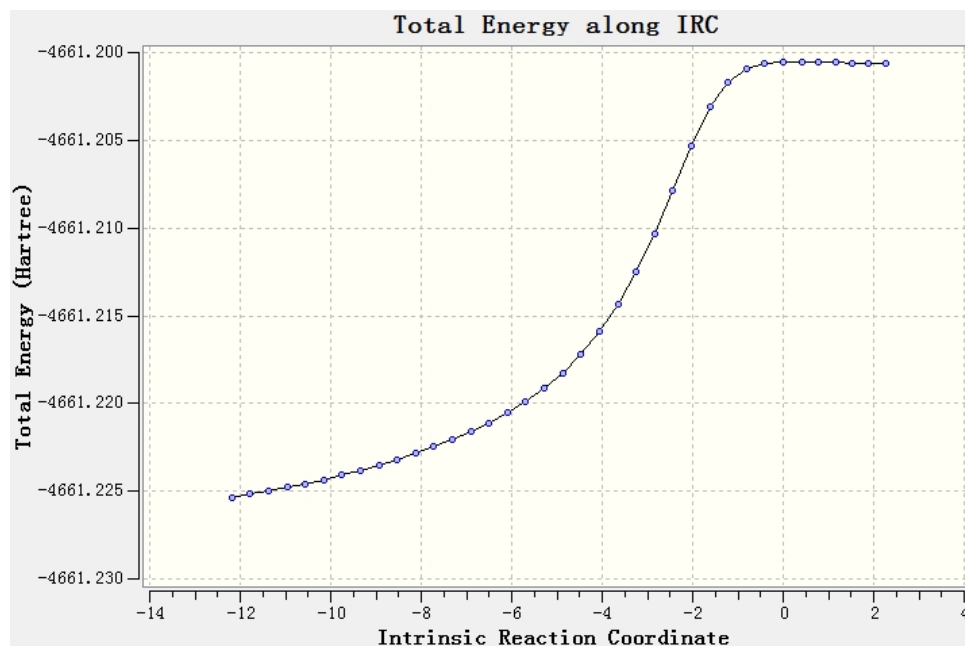

**Figure S5.** IRC check for transition state **9a**.

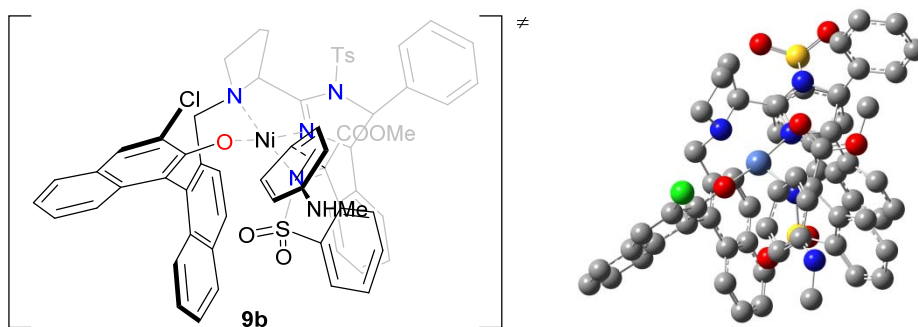

**Figure S6.** Optimized structure and model for transition state of *Re*-attack (**9b**).

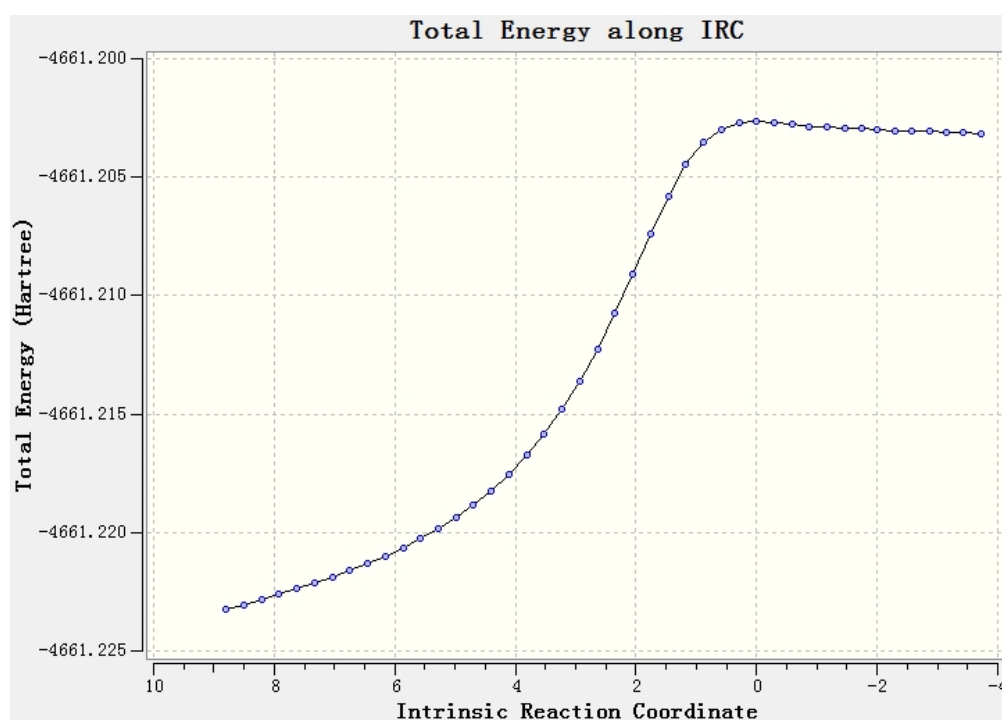

**Figure S7.** IRC check for transition state **9b**.

As the activation energy difference between the two transition state structures could not account for the high enantioselectivity of the reaction, it seemed to be necessary to investigate the reactions in details.

In general, a Friedel-Crafts reaction would involve the electrophilic attack of an electrophile on the aryl ring and temporarily open one of the C=C double bonds in the aryl ring to give the reaction intermediate. Next, aromatization of the intermediate via proton abstraction provided the corresponding aromatic electrophilic substitution product. In most reactions, electrophilic attack of the catalyst-controlled electrophile on the aryl ring was considered a rate determining step. Enantiofacial selection could be expected when the electrophile selectively interacted with the chiral catalyst with one of its prochiral faces.

However, in the current reaction between a relatively less reactive ketimine such as **1b** with relatively less reactive arylamine such as **2p**, the enantiofacial selection seemed not to be the only governing factor leading to the experimental results, and it was very necessary to establish the links between the activation of the electrophiles and the formation of the product. Further computation results showed that the energies of the Friedel-Crafts intermediates were very closed to the energies of the transition states, and were higher than the sums of energies of **8a** and **2p** ( $\Delta G = 19.3$  kcal/mol) or **8b** and **2p** ( $\Delta G = 18.9$  kcal/mol). These results suggested that the equilibria favored the starting materials **8** and **2p** rather than the Friedel-Crafts intermediates **10** (Figure S8) if no special measures were taken to shift the equilibria to the product side.

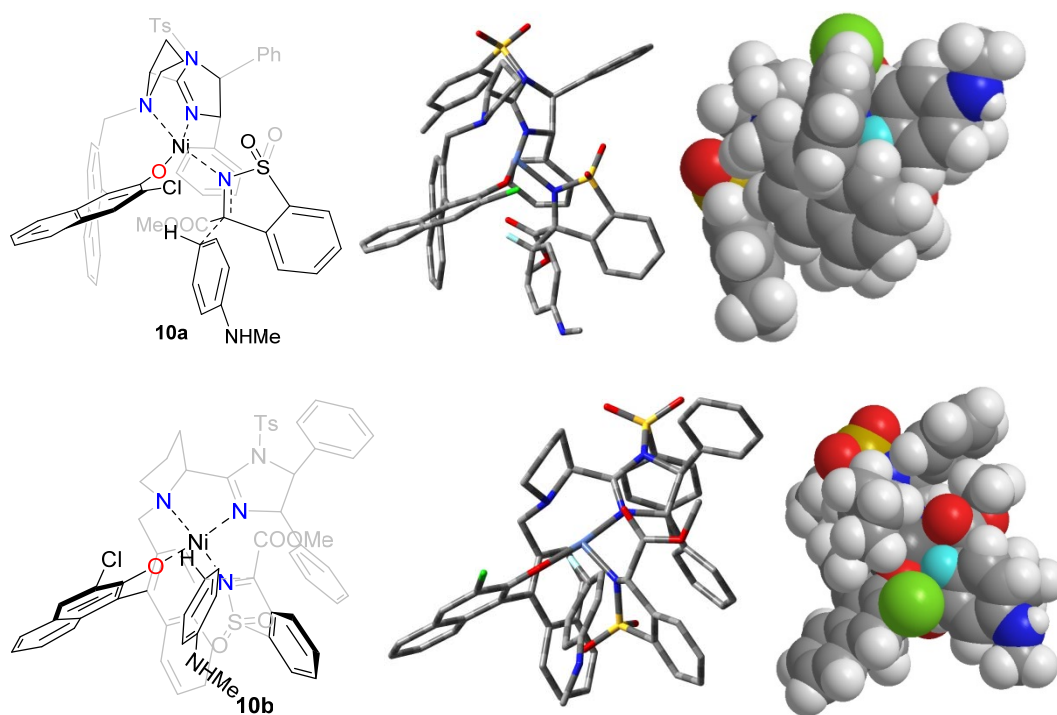

**Figure S8.** Structures and models for Friedel-Crafts intermediates. (a) **10a**: intermediate for *Si*-attack. (b) **10b**: intermediate for *Re*-attack.

Carefully examining the space filling models of the Friedel-Crafts intermediates **10a** and **10b** suggested that the hydrogen atoms to be abstracted (colored in cyan) in these intermediates were hidden inside the cavities formed by the naphthyl ring, the arylamine ring and the chlorine atom in the chiral ligand. Especially in intermediate **10a**, the hydrogen atom was located deep inside the cavity. The information suggested that aromatization of the intermediates via proton abstraction in the presence of a base was difficult and was less



likely.<sup>10</sup> There must exist other possible ways for the aromatization of the intermediates and/or for the departure of the proton.

Direct departure of the Friedel-Crafts intermediates from the catalyst seemed to be unlikely. Potential energy scan results suggested that the intermediates may decompose to **1b** and **2p** upon increasing the distance between the Friedel-Crafts intermediate and the catalyst. This was also in good agreement with the results that the equilibrium favored the starting material rather than the Friedel-Crafts intermediate and that the reaction between **1b** and **2p** could not happen in the absence of a catalyst.

Different modes for proton departure were then proposed. Further potential energy scan results suggested that direct migration of the proton from the aminoaryl ring to the nitrogen atom seemed to be less likely for either intermediate **10a** or **10b** due to the high energy barriers.

A two-step formation of the product was then proposed. At first, the proton was temporarily transferred from the aminoaryl ring (**10a/10b**) to the naphtholate oxygen in the chiral ligand to give intermediates **11a** and **11b**, and another proton transfer from the naphthol group to the nitrogen atom gave intermediates **12a/12b** which were ready for the departure of the products and the coordination of another molecule of ketimine **1b** (Scheme S4).

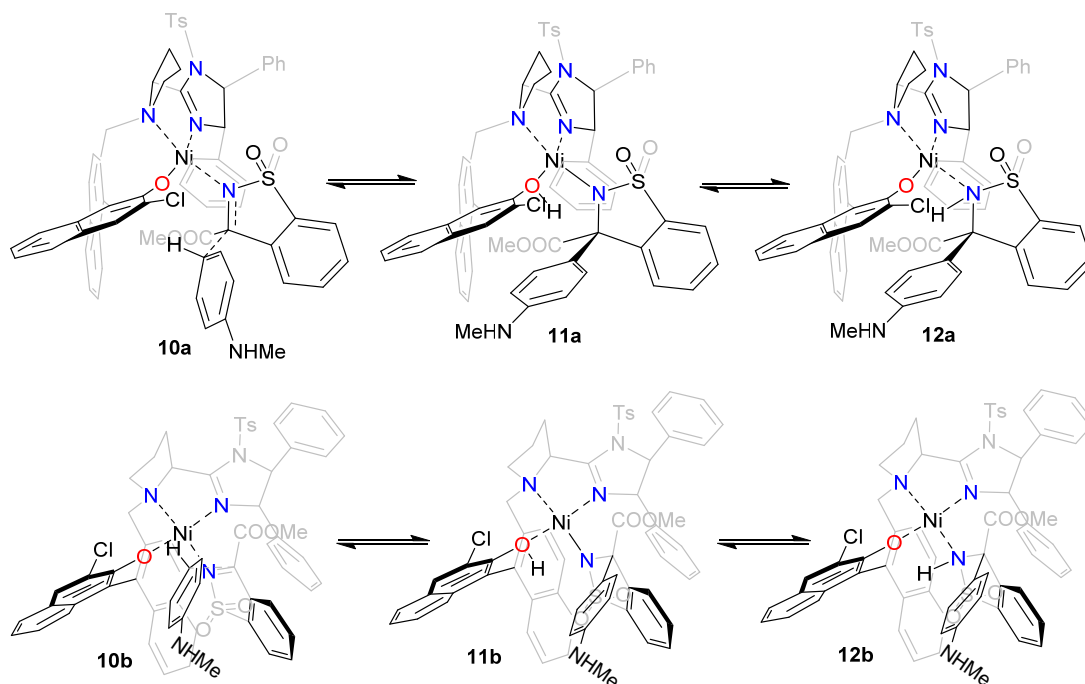

**Scheme S4.** Possible proton transfers in intermediate **10**.

DFT calculations were carried out to test the feasibility of the proposed reaction pathways. At first, transition state TS-1 for conversion of **10a** to **11a** was optimized and the structure was checked with IRC calculations. Structure of intermediate **11a** was also optimized (Figure S9).

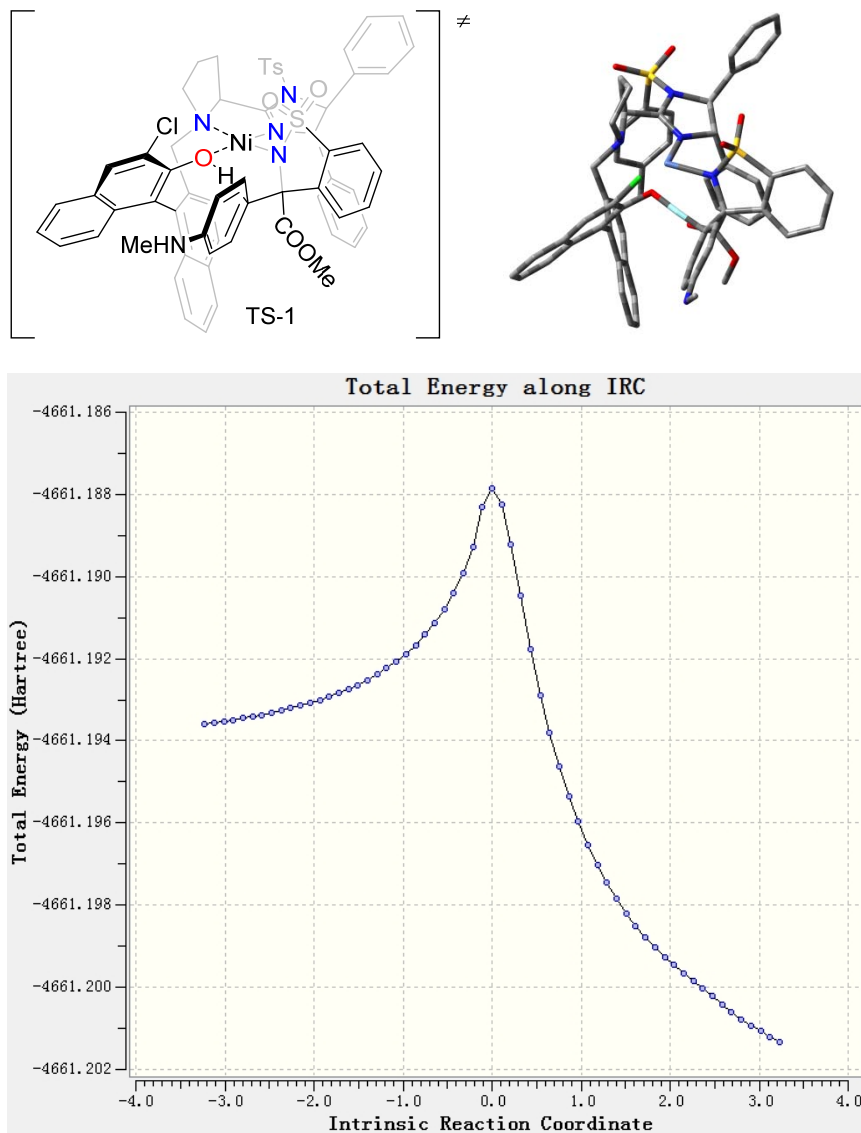

**Figure S9.** Transition state for proton transfer from aminoaryl ring in **10a** to naphtholate oxygen in the chiral ligand. (a) Optimized transition state **TS-1**. (b) Model for **TS-1**. (c) IRC result for **TS-1**.

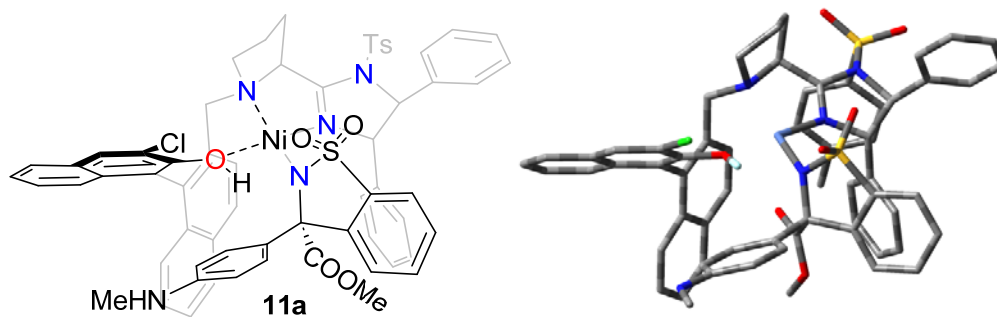

Similarly, transition state TS-1' for conversion of **10b** to **11b** was optimized and the structure was checked with IRC calculations. Structure of intermediate **11b** was also optimized (Figure S10).

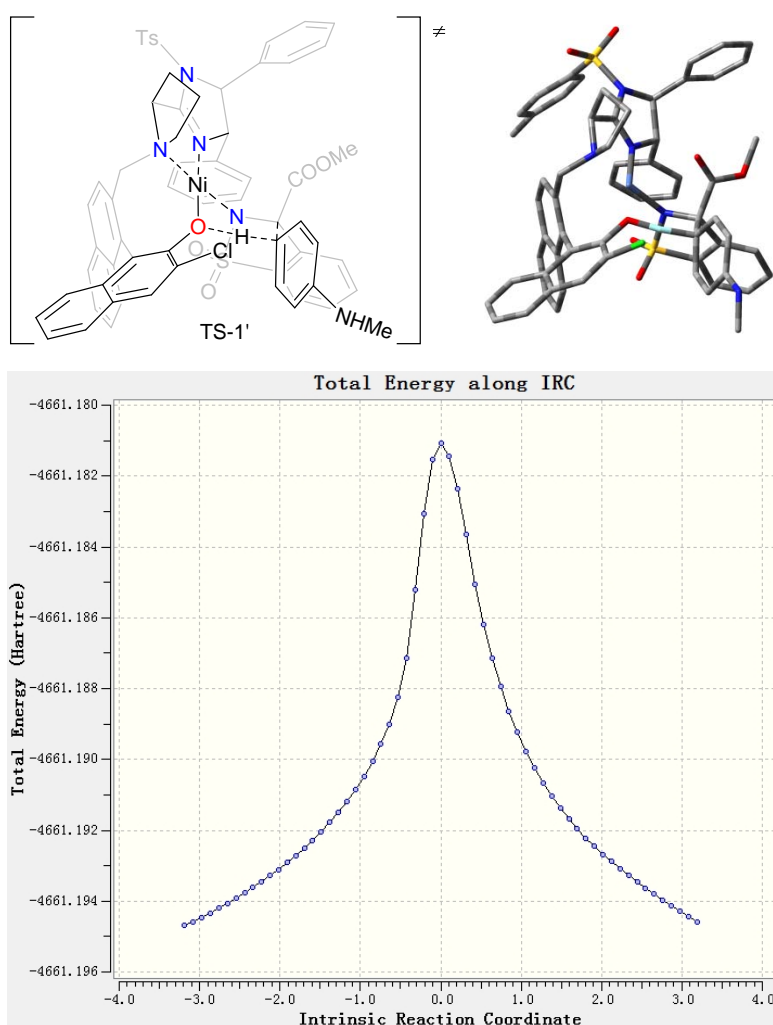

**Figure S10.** Transition state for proton transfer from aminoaryl ring in **10b** to naphthol oxygen in the chiral ligand. (a) Optimized transition state **TS-1'**. (b) Model for **TS-1'**. (c) IRC result for **TS-1'**.

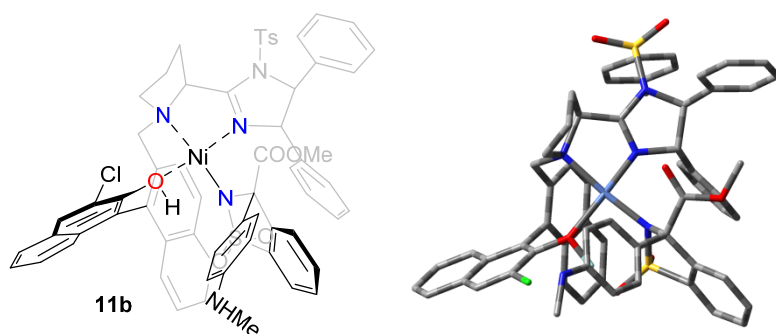

Proton migration processes from naphthol oxygen (**11a/11b**) to sulfonamide nitrogen (**12a/12b**) were also studied.

Transition state TS-2 for conversion of **11a** to **12a** was optimized and the structure was checked with IRC calculations (Figure S11). Structure of intermediate **12a** was also optimized .

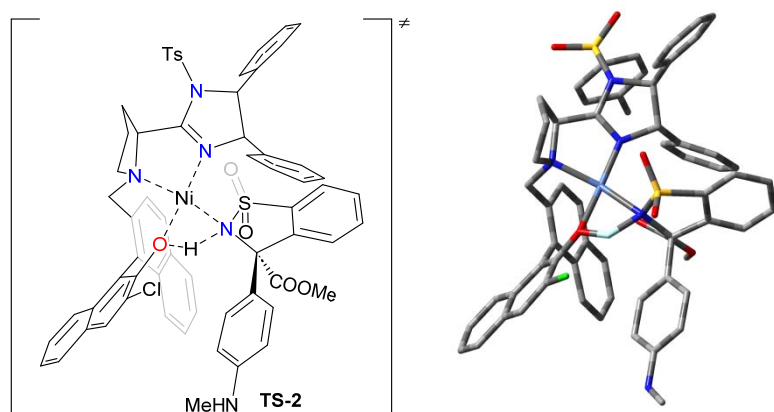

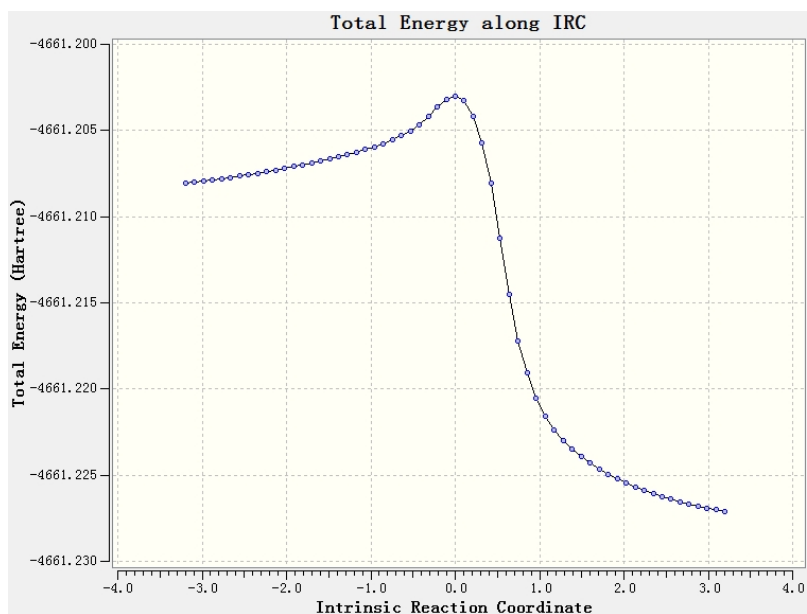

**Figure S11.** Transition state for proton transfer from naphthol oxygen in **11a** to sulfonamide nitrogen. (a) Optimized transition state **TS-2**. (b) Model for **TS-2**. (c) IRC result for **TS-2**.

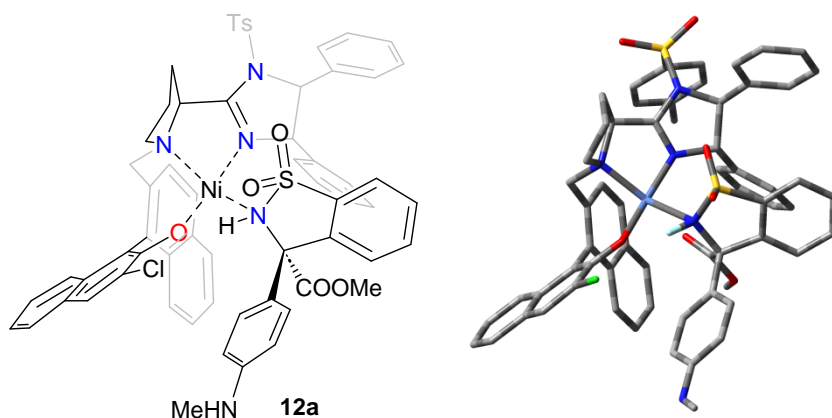

Transition state **TS-2'** for reaction of **11b** to **12b** was optimized and the structure was checked with IRC calculations (Figure S12).. Structure of intermediate **12b** was also optimized.

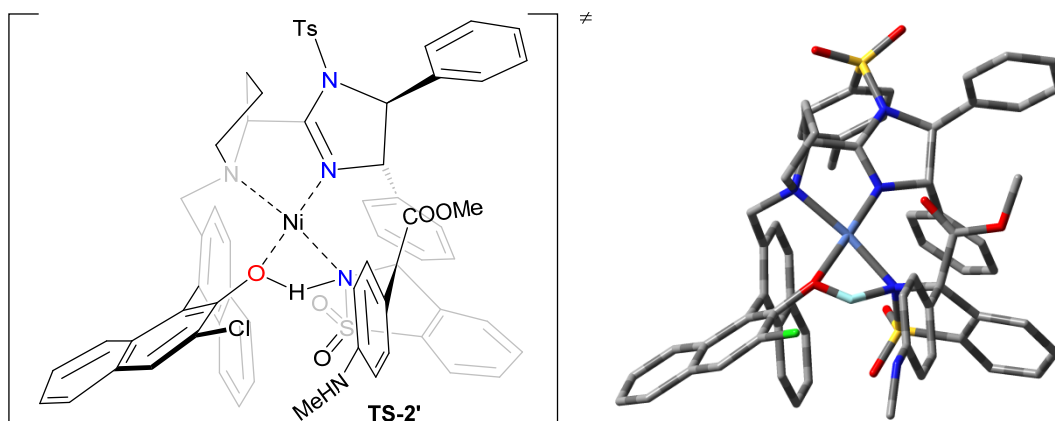

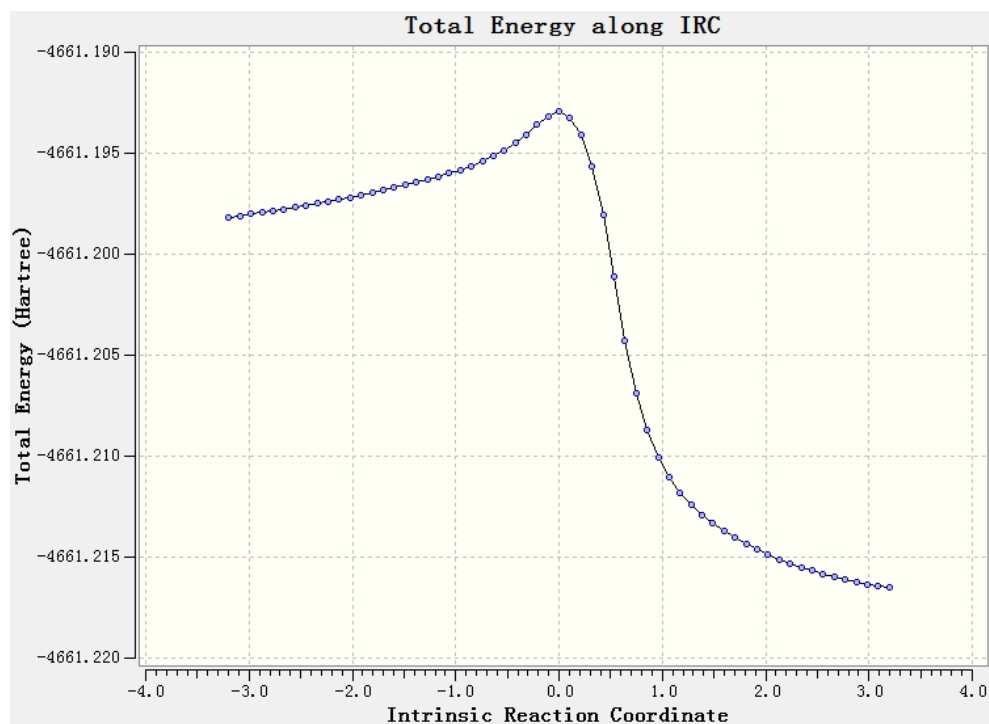

**Figure S12.** Transition state for proton transfer from naphthol oxygen in **11b** to sulfonamide nitrogen. (a) Optimized transition state **TS-2'**. (b) Model for **TS-2'**. (c) IRC result for **TS-2'**.

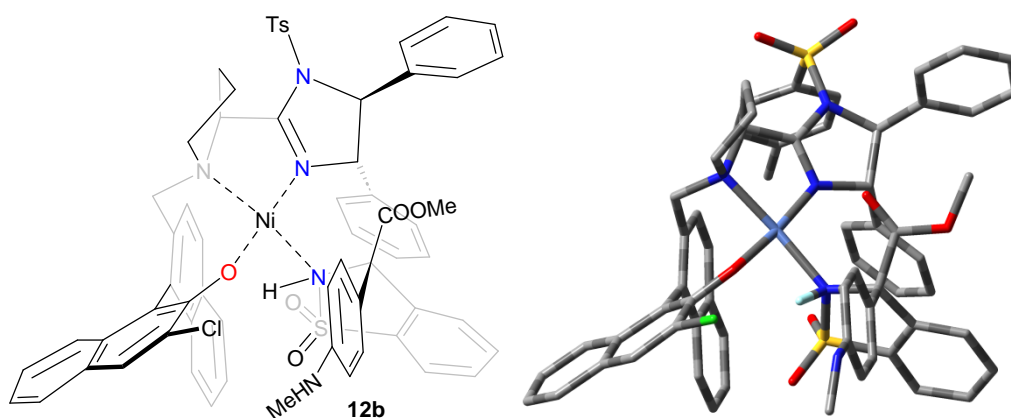

Based on these preliminary results, energy profiles for Friedel-Crafts alkylation of **2p** with **8** could be established (Table S2, Figure S13).

**Table S2.** Relative Energies for Intermediates and Transition States ( $\Delta G$ , kcal/mol)

| Intermediates/<br>Transition States | $\Delta G$ (kcal/mol) | Intermediates/<br>Transition States | $\Delta G$ (kcal/mol) |
|-------------------------------------|-----------------------|-------------------------------------|-----------------------|
| 7a + 1a + 2p                        | 0                     | 7a + 1a + 2p                        | 0                     |
| 8a + 2p                             | -15.4                 | 8b + 2p                             | -17.0                 |
| 9a                                  | 4.2                   | 9b                                  | 2.5                   |
| 10a                                 | 3.9                   | 10b                                 | 1.9                   |

|      |       |       |      |
|------|-------|-------|------|
| TS-1 | 10.5  | TS-1' | 14.6 |
| 11a  | -2.9  | 11b   | 4.1  |
| TS-2 | 1.0   | TS-2' | 7.2  |
| 12a  | -17.4 | 12b   | -7.0 |

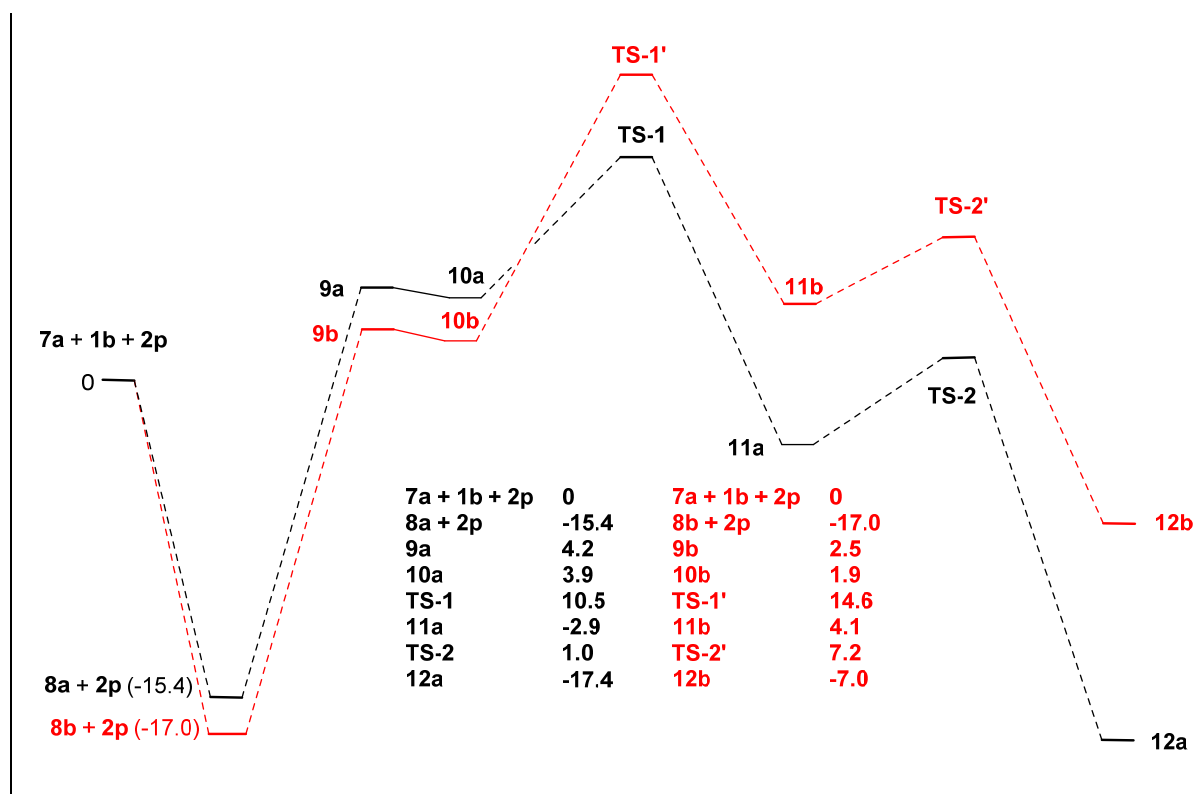

**Figure S13.** Energy profiles for nickel complex (**7b**)-catalyzed enantioselective Friedel-Crafts reaction of **2p** with **1b**.

The preliminary results suggested that the key factor governing the enantioselectivity of the reaction would be the aromatization of **10** in which the protons transfer from aminoaryl group in **10a** or **10b** to the naphtholate oxygen to form the aromatized intermediate **11a** or **11b**. While the process for transformation from **10a** to **11a** was possible at room temperature (the total activation energy is 25.9 kcal/mol), transformation from **10b** to **11b** proceeded relatively slowly due to a higher energy barrier (the total activation energy was 31.6 kcal/mol). The second proton transfer from the naphthol hydroxyl group to the sulfonamide nitrogen to give intermediate **12** was a fast step and was not rate-determining. In other word, the aromatization of the Friedel-Crafts intermediate **10** is the rate determining step of the reaction, and the formation of intermediate **11a** is a favored process over the formation of intermediate **11b**.

To test if this assumption was reasonable, control experiments were carried out using *N,N*-dimethylaniline and 4-deuterated *N,N*-dimethylaniline as the aromatic compounds and **1a** as the model electrophile.

The reactions were carried out side-by-side under identical optimized conditions, and were quenched after the reaction mixtures were stirred for 3 hours. NMR analysis of the crude products suggested the presence of isotope effect (Scheme S5).

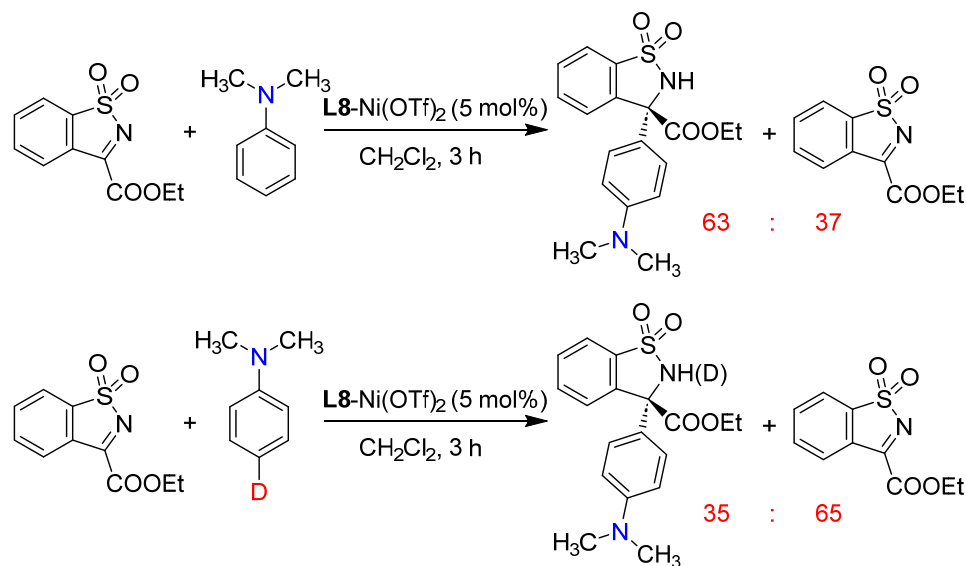

**Scheme S5.** Isotope effect study using *N,N*-dimethylaniline and 4-deuterated *N,N*-dimethylaniline as the arylamines.

Further, deuterated product was detected in HRMS analysis although the relative abundance was low due to the possible proton exchange during the handling of the sample (Figure S14). This results suggested that it was reasonable to believe that the amide proton came from the para-hydrogen of the aromatic amine.



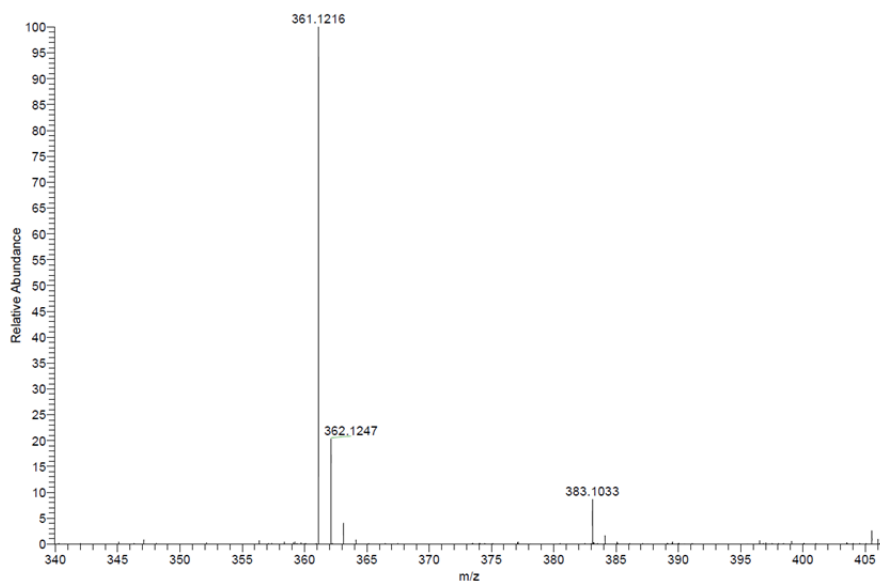

**Figure S14.** HRMS analysis of the reaction product between **1a** and 4-deuterated *N,N*-dimethylaniline.

On the basis of these findings, a tentative reaction mechanism was proposed and was shown in Scheme S6. Reaction between chiral ligand **L6-N(S)** and Ni(OTf)<sub>2</sub> provided complex **7a** as the catalyst of the reaction. Complexation of the electrophile **2b** to **7a** provided the intermediate **8a** or **8b** in which C=N double bond was activated upon coordination to the central metal. Electrophilic attack of **8a** or **8b** on **2p** via transition state **9a** or **9b** provided the key intermediates **10a** or **10b**. Proton transfer from the aminoaryl ring in **10a** to the naphtholate then occurred, providing intermediate **11a** which was transformed to intermediate **12a** via another proton transfer. Coordination of another molecule of **1b** released the (*R*)-product and provided another molecule of **8**, thus completing the catalytic circle. Formation of intermediate **10b** was kinetically favored. However, subsequent aromatization of this intermediate to **11b** was difficult due to the high energy barrier. Therefore, formation of the (*S*)-product was not the predominant path.

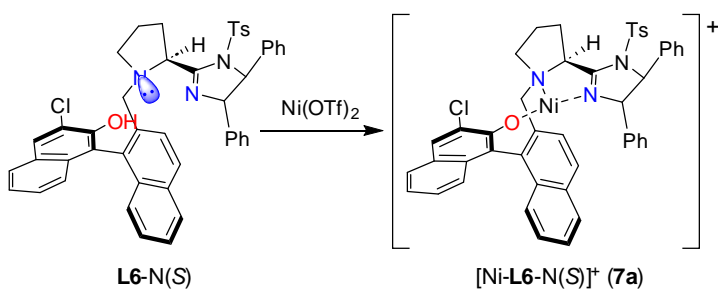

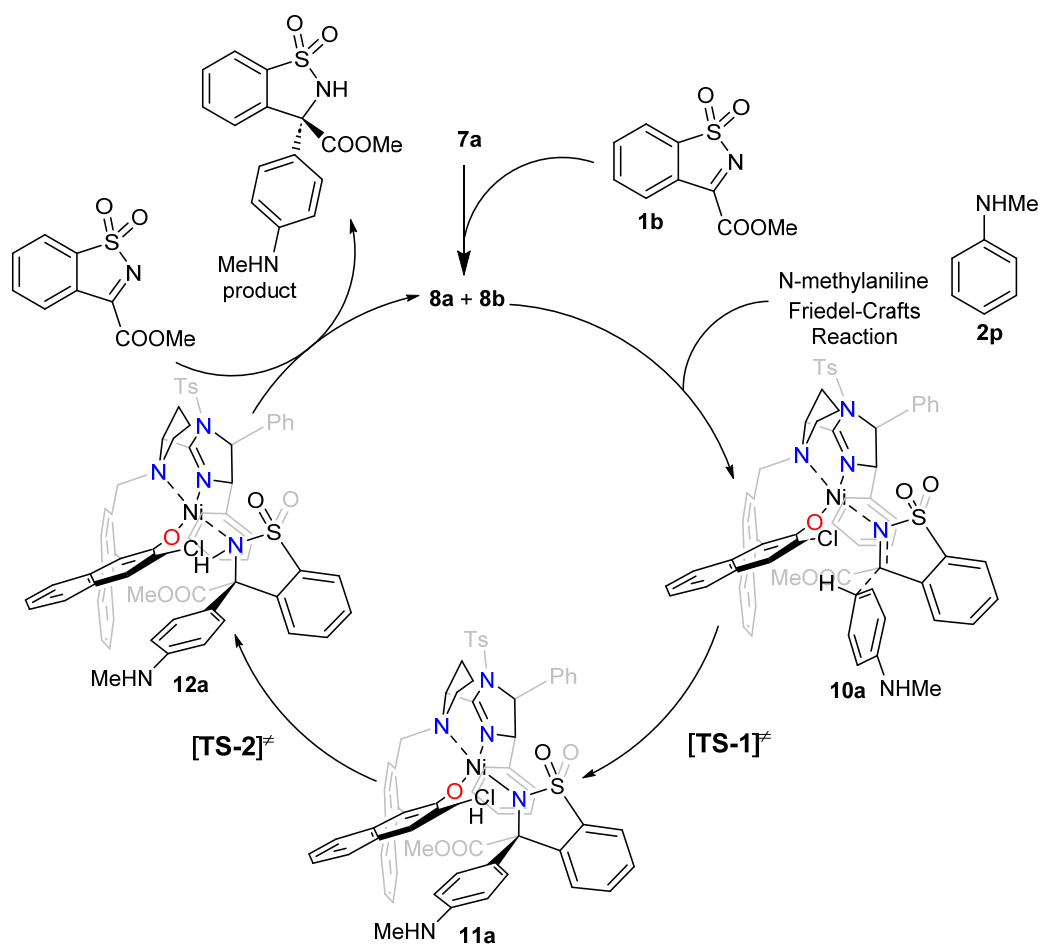

**Scheme S6.** Catalytic cycle for **L8**-Ni(OTf)<sub>2</sub>-catalyzed enantioselective Friedel-Crafts reaction of **2p** with **1b**.

## 5.2. Optimized Structures of Chiral Ligand L6

Structure of L6-N(R)

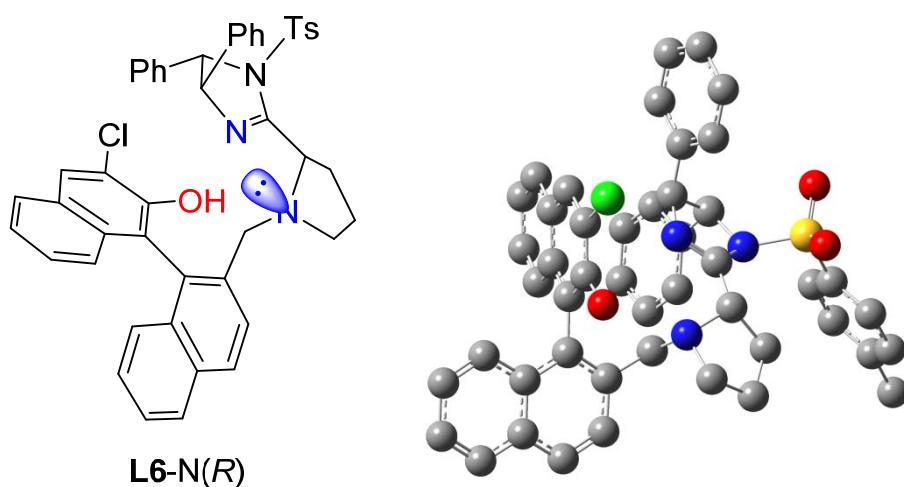

| Center Number | Atomic Number | Atomic Type | Coordinates (Angstroms) |           |           |
|---------------|---------------|-------------|-------------------------|-----------|-----------|
|               |               |             | X                       | Y         | Z         |
| 1             | 6             | 0           | 5.225481                | -0.823842 | -1.624579 |
| 2             | 6             | 0           | 4.015266                | -0.377283 | -1.144343 |
| 3             | 6             | 0           | 3.524776                | -0.806223 | 0.116254  |
| 4             | 6             | 0           | 4.327255                | -1.715414 | 0.880191  |
| 5             | 6             | 0           | 5.567861                | -2.155358 | 0.357472  |
| 6             | 6             | 0           | 6.010876                | -1.721779 | -0.869988 |
| 7             | 1             | 0           | 5.580883                | -0.481049 | -2.594906 |
| 8             | 1             | 0           | 3.419935                | 0.316921  | -1.735457 |
| 9             | 6             | 0           | 2.269098                | -0.363394 | 0.642631  |
| 10            | 6             | 0           | 3.860883                | -2.148916 | 2.142818  |
| 11            | 1             | 0           | 6.164381                | -2.847235 | 0.952079  |
| 12            | 1             | 0           | 6.965363                | -2.068387 | -1.262116 |
| 13            | 6             | 0           | 2.653253                | -1.710506 | 2.626243  |
| 14            | 6             | 0           | 1.839775                | -0.818968 | 1.885861  |
| 15            | 1             | 0           | 4.475744                | -2.837189 | 2.722489  |
| 16            | 1             | 0           | 2.298068                | -2.048155 | 3.600562  |
| 17            | 6             | 0           | 1.449835                | 0.600042  | -0.147913 |
| 18            | 6             | 0           | 1.505963                | 2.001617  | 0.100342  |

|    |   |   |           |           |           |
|----|---|---|-----------|-----------|-----------|
| 19 | 6 | 0 | 0.632441  | 0.109696  | -1.157426 |
| 20 | 6 | 0 | 2.255459  | 2.556826  | 1.169284  |
| 21 | 6 | 0 | 0.764862  | 2.895768  | -0.738482 |
| 22 | 6 | 0 | -0.104060 | 1.010958  | -1.967991 |
| 23 | 6 | 0 | 2.269589  | 3.914933  | 1.397099  |
| 24 | 1 | 0 | 2.818083  | 1.890822  | 1.822753  |
| 25 | 6 | 0 | 0.817495  | 4.289383  | -0.491493 |
| 26 | 6 | 0 | -0.033006 | 2.366229  | -1.778258 |
| 27 | 6 | 0 | 1.549870  | 4.793597  | 0.559097  |
| 28 | 1 | 0 | 2.842094  | 4.315269  | 2.232676  |
| 29 | 1 | 0 | 0.248702  | 4.951869  | -1.144147 |
| 30 | 1 | 0 | -0.616382 | 3.038499  | -2.405062 |
| 31 | 1 | 0 | 1.570971  | 5.865357  | 0.750545  |
| 32 | 8 | 0 | 0.505318  | -1.209095 | -1.421674 |
| 33 | 6 | 0 | 0.520897  | -0.384953 | 2.459572  |
| 34 | 1 | 0 | 0.395954  | 0.694169  | 2.317165  |
| 35 | 1 | 0 | 0.527206  | -0.572125 | 3.550316  |
| 36 | 6 | 0 | -0.651957 | -2.480283 | 2.124384  |
| 37 | 6 | 0 | -1.917191 | -0.611608 | 2.350085  |
| 38 | 6 | 0 | -1.204580 | -2.579903 | 3.558278  |
| 39 | 1 | 0 | 0.338567  | -2.930874 | 1.998118  |
| 40 | 1 | 0 | -1.333345 | -2.970202 | 1.415917  |
| 41 | 6 | 0 | -2.021920 | -1.288402 | 3.732688  |
| 42 | 1 | 0 | -2.683227 | -1.063322 | 1.700883  |
| 43 | 1 | 0 | -1.814687 | -3.479874 | 3.691419  |
| 44 | 1 | 0 | -0.392213 | -2.636095 | 4.292826  |
| 45 | 1 | 0 | -3.062567 | -1.487518 | 3.999436  |
| 46 | 1 | 0 | -1.604135 | -0.642972 | 4.517969  |
| 47 | 7 | 0 | -0.614689 | -1.048793 | 1.783471  |
| 48 | 1 | 0 | 0.910543  | -1.699001 | -0.681640 |
| 49 | 6 | 0 | -2.092467 | 0.876228  | 2.265072  |
| 50 | 7 | 0 | -1.590966 | 1.569322  | 1.316102  |
| 51 | 6 | 0 | -2.350768 | 3.049033  | 3.036425  |

|    |    |   |           |           |           |
|----|----|---|-----------|-----------|-----------|
| 52 | 1  | 0 | -3.222414 | 3.696984  | 3.164496  |
| 53 | 6  | 0 | -1.897908 | 2.976166  | 1.540860  |
| 54 | 1  | 0 | -0.971466 | 3.556241  | 1.437077  |
| 55 | 16 | 0 | -4.306416 | 1.273666  | 3.830173  |
| 56 | 8  | 0 | -4.757461 | 0.100495  | 3.085994  |
| 57 | 8  | 0 | -5.069391 | 2.519474  | 3.787302  |
| 58 | 6  | 0 | -4.078716 | 0.826392  | 5.530881  |
| 59 | 6  | 0 | -4.560009 | -0.393440 | 5.994936  |
| 60 | 6  | 0 | -3.451719 | 1.730380  | 6.390592  |
| 61 | 6  | 0 | -4.392788 | -0.716061 | 7.338865  |
| 62 | 1  | 0 | -5.053071 | -1.082026 | 5.312187  |
| 63 | 6  | 0 | -3.288752 | 1.388180  | 7.724132  |
| 64 | 6  | 0 | -3.753288 | 0.160217  | 8.220603  |
| 65 | 1  | 0 | -4.764192 | -1.670719 | 7.708965  |
| 66 | 7  | 0 | -2.726714 | 1.640250  | 3.294598  |
| 67 | 1  | 0 | -3.087399 | 2.687357  | 6.019305  |
| 68 | 6  | 0 | -3.561544 | -0.194392 | 9.660977  |
| 69 | 1  | 0 | -2.496227 | -0.238515 | 9.921803  |
| 70 | 1  | 0 | -4.011483 | 0.557493  | 10.321496 |
| 71 | 1  | 0 | -4.006463 | -1.165270 | 9.902397  |
| 72 | 1  | 0 | -2.793200 | 2.085631  | 8.398694  |
| 73 | 17 | 0 | -1.142557 | 0.358243  | -3.209672 |
| 74 | 6  | 0 | -2.903798 | 3.504211  | 0.546562  |
| 75 | 6  | 0 | -2.913714 | 4.870512  | 0.243893  |
| 76 | 6  | 0 | -3.846739 | 2.671214  | -0.061062 |
| 77 | 6  | 0 | -3.855894 | 5.397474  | -0.634527 |
| 78 | 1  | 0 | -2.166121 | 5.522891  | 0.698949  |
| 79 | 6  | 0 | -4.790087 | 3.197649  | -0.941822 |
| 80 | 1  | 0 | -3.832593 | 1.600126  | 0.139734  |
| 81 | 6  | 0 | -4.800374 | 4.560603  | -1.228131 |
| 82 | 1  | 0 | -3.849009 | 6.462379  | -0.862143 |
| 83 | 1  | 0 | -5.518130 | 2.536106  | -1.408683 |
| 84 | 1  | 0 | -5.536772 | 4.969637  | -1.917876 |

|    |   |   |           |          |          |
|----|---|---|-----------|----------|----------|
| 85 | 6 | 0 | -1.218602 | 3.500420 | 3.928317 |
| 86 | 6 | 0 | -0.914612 | 4.865694 | 3.983779 |
| 87 | 6 | 0 | -0.412205 | 2.601840 | 4.630459 |
| 88 | 6 | 0 | 0.172269  | 5.321747 | 4.723267 |
| 89 | 1 | 0 | -1.539843 | 5.575978 | 3.440532 |
| 90 | 6 | 0 | 0.679318  | 3.056738 | 5.368232 |
| 91 | 1 | 0 | -0.651353 | 1.538664 | 4.607875 |
| 92 | 6 | 0 | 0.975817  | 4.416688 | 5.416654 |
| 93 | 1 | 0 | 0.392163  | 6.387601 | 4.760216 |
| 94 | 1 | 0 | 1.298173  | 2.342400 | 5.909621 |
| 95 | 1 | 0 | 1.827206  | 4.770982 | 5.995347 |

Number of imaginary frequency: 0

Energy:

|                                              |              |
|----------------------------------------------|--------------|
| Sum of electronic and zero-point Energies=   | -3062.846131 |
| Sum of electronic and thermal Energies=      | -3062.801450 |
| Sum of electronic and thermal Enthalpies=    | -3062.800506 |
| Sum of electronic and thermal Free Energies= | -3062.922790 |

Structure of **L6-N(S)**

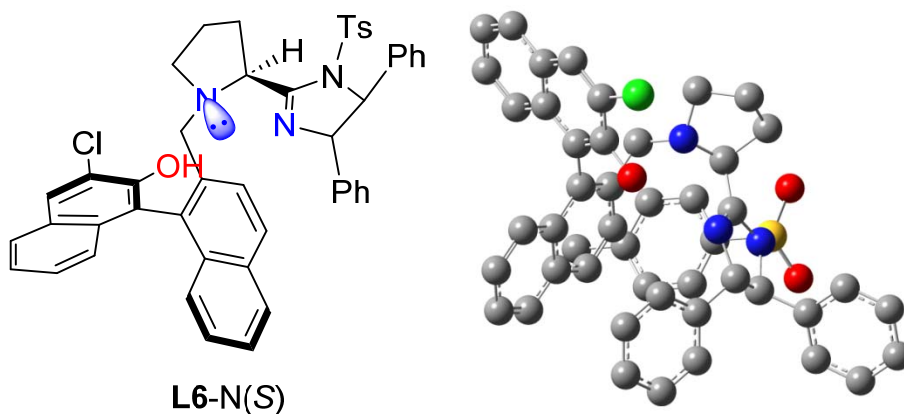

| Center Number | Atomic Number | Atomic Type | Coordinates (Angstroms) |           |           |
|---------------|---------------|-------------|-------------------------|-----------|-----------|
|               |               |             | X                       | Y         | Z         |
| 1             | 6             | 0           | 2.786908                | 13.467724 | 20.185868 |
| 2             | 1             | 0           | 2.025240                | 13.629023 | 22.176617 |
| 3             | 6             | 0           | 2.225045                | 12.972314 | 21.332704 |

|    |   |   |           |           |           |
|----|---|---|-----------|-----------|-----------|
| 4  | 6 | 0 | 3.061753  | 12.645456 | 19.060621 |
| 5  | 6 | 0 | 1.907307  | 11.598384 | 21.418904 |
| 6  | 8 | 0 | 3.646481  | 13.127267 | 17.943620 |
| 7  | 6 | 0 | 2.732960  | 11.297674 | 19.105077 |
| 8  | 6 | 0 | 1.340600  | 11.046028 | 22.593813 |
| 9  | 6 | 0 | 2.166431  | 10.750480 | 20.292363 |
| 10 | 6 | 0 | 2.973772  | 10.443552 | 17.908530 |
| 11 | 1 | 0 | 1.151039  | 11.707073 | 23.439154 |
| 12 | 6 | 0 | 1.036968  | 9.707033  | 22.667243 |
| 13 | 6 | 0 | 1.837814  | 9.374285  | 20.404869 |
| 14 | 6 | 0 | 4.267549  | 9.879649  | 17.690189 |
| 15 | 6 | 0 | 1.934875  | 10.162150 | 17.029909 |
| 16 | 1 | 0 | 0.604084  | 9.292281  | 23.575632 |
| 17 | 6 | 0 | 1.290072  | 8.867349  | 21.561071 |
| 18 | 1 | 0 | 2.029407  | 8.716636  | 19.558305 |
| 19 | 6 | 0 | 5.355337  | 10.117070 | 18.570135 |
| 20 | 6 | 0 | 4.484303  | 9.026838  | 16.559305 |
| 21 | 6 | 0 | 2.176704  | 9.338489  | 15.905126 |
| 22 | 6 | 0 | 0.546045  | 10.714507 | 17.252450 |
| 23 | 1 | 0 | 1.050206  | 7.807197  | 21.623723 |
| 24 | 1 | 0 | 5.203544  | 10.763624 | 19.433794 |
| 25 | 6 | 0 | 6.585469  | 9.538960  | 18.352154 |
| 26 | 6 | 0 | 5.761954  | 8.447151  | 16.364345 |
| 27 | 6 | 0 | 3.411883  | 8.787910  | 15.667084 |
| 28 | 1 | 0 | 1.346712  | 9.136882  | 15.226434 |
| 29 | 7 | 0 | 0.365401  | 12.067841 | 16.743358 |
| 30 | 1 | 0 | -0.191463 | 10.024452 | 16.795110 |
| 31 | 1 | 0 | 0.327435  | 10.733768 | 18.327103 |
| 32 | 1 | 0 | 7.404725  | 9.732787  | 19.042867 |
| 33 | 6 | 0 | 6.793067  | 8.693545  | 17.240718 |
| 34 | 1 | 0 | 5.912199  | 7.804998  | 15.495818 |
| 35 | 1 | 0 | 3.582428  | 8.155611  | 14.794183 |
| 36 | 6 | 0 | -0.449217 | 12.951538 | 17.571436 |

|    |    |   |           |           |           |
|----|----|---|-----------|-----------|-----------|
| 37 | 6  | 0 | -0.133755 | 12.148173 | 15.370553 |
| 38 | 1  | 0 | 7.770501  | 8.241867  | 17.078949 |
| 39 | 1  | 0 | 0.095677  | 13.211682 | 18.489964 |
| 40 | 1  | 0 | -1.410522 | 12.487025 | 17.874781 |
| 41 | 6  | 0 | -0.695953 | 14.122576 | 16.644329 |
| 42 | 6  | 0 | -1.023496 | 13.415891 | 15.332116 |
| 43 | 1  | 0 | -0.748786 | 11.261713 | 15.140741 |
| 44 | 6  | 0 | 0.979971  | 12.224421 | 14.358876 |
| 45 | 1  | 0 | 0.225579  | 14.712502 | 16.547099 |
| 46 | 1  | 0 | -1.498296 | 14.786151 | 16.983345 |
| 47 | 1  | 0 | -0.847013 | 14.028718 | 14.441665 |
| 48 | 1  | 0 | -2.076440 | 13.112805 | 15.311742 |
| 49 | 7  | 0 | 2.161470  | 12.632899 | 14.615208 |
| 50 | 7  | 0 | 0.733660  | 11.949530 | 12.988539 |
| 51 | 6  | 0 | 2.931230  | 12.649042 | 13.373742 |
| 52 | 16 | 0 | -0.519939 | 10.980037 | 12.371069 |
| 53 | 6  | 0 | 2.034004  | 12.018469 | 12.266332 |
| 54 | 1  | 0 | 3.080932  | 13.710508 | 13.111039 |
| 55 | 8  | 0 | -1.767444 | 11.517155 | 12.903641 |
| 56 | 8  | 0 | -0.271597 | 10.919073 | 10.935834 |
| 57 | 6  | 0 | -0.288835 | 9.350683  | 13.035570 |
| 58 | 1  | 0 | 2.373403  | 10.996518 | 12.035818 |
| 59 | 6  | 0 | -1.143671 | 8.882837  | 14.032853 |
| 60 | 6  | 0 | 0.752860  | 8.555236  | 12.550944 |
| 61 | 1  | 0 | -1.971283 | 9.500955  | 14.374760 |
| 62 | 6  | 0 | -0.932627 | 7.615908  | 14.566526 |
| 63 | 6  | 0 | 0.950828  | 7.295943  | 13.101151 |
| 64 | 1  | 0 | 1.388637  | 8.910742  | 11.741617 |
| 65 | 6  | 0 | 0.123369  | 6.811221  | 14.124579 |
| 66 | 1  | 0 | 1.763384  | 6.671673  | 12.730624 |
| 67 | 1  | 0 | 3.763805  | 14.090659 | 18.024319 |
| 68 | 1  | 0 | -1.600458 | 7.244853  | 15.343140 |
| 69 | 6  | 0 | 0.390427  | 5.478979  | 14.747154 |



|    |    |   |           |           |           |
|----|----|---|-----------|-----------|-----------|
| 70 | 1  | 0 | 0.734905  | 4.746471  | 14.008590 |
| 71 | 1  | 0 | 1.182676  | 5.560109  | 15.505107 |
| 72 | 1  | 0 | -0.496440 | 5.076640  | 15.247999 |
| 73 | 17 | 0 | 3.171031  | 15.174234 | 20.064387 |
| 74 | 6  | 0 | 4.297230  | 12.024106 | 13.550526 |
| 75 | 6  | 0 | 4.928478  | 12.088105 | 14.797800 |
| 76 | 6  | 0 | 4.973311  | 11.422282 | 12.485327 |
| 77 | 6  | 0 | 6.205521  | 11.564278 | 14.972203 |
| 78 | 1  | 0 | 4.399104  | 12.530064 | 15.640009 |
| 79 | 6  | 0 | 6.248424  | 10.886874 | 12.663571 |
| 80 | 1  | 0 | 4.506319  | 11.370472 | 11.501057 |
| 81 | 6  | 0 | 6.869888  | 10.956862 | 13.907785 |
| 82 | 1  | 0 | 6.674567  | 11.612937 | 15.954804 |
| 83 | 1  | 0 | 6.755522  | 10.413931 | 11.823715 |
| 84 | 1  | 0 | 7.862997  | 10.532479 | 14.050651 |
| 85 | 6  | 0 | 1.971926  | 12.836545 | 11.004198 |
| 86 | 6  | 0 | 2.467114  | 12.328495 | 9.802583  |
| 87 | 6  | 0 | 1.454384  | 14.135240 | 11.028426 |
| 88 | 6  | 0 | 2.454509  | 13.104342 | 8.645154  |
| 89 | 1  | 0 | 2.855036  | 11.308768 | 9.775958  |
| 90 | 6  | 0 | 1.432309  | 14.909137 | 9.872253  |
| 91 | 1  | 0 | 1.056741  | 14.540182 | 11.959624 |
| 92 | 6  | 0 | 1.935840  | 14.396640 | 8.676856  |
| 93 | 1  | 0 | 2.843389  | 12.694270 | 7.714566  |
| 94 | 1  | 0 | 1.020991  | 15.916830 | 9.904616  |
| 95 | 1  | 0 | 1.920572  | 15.002625 | 7.772657  |

Number of imaginary frequency: 0

Energies:

|                                              |              |
|----------------------------------------------|--------------|
| Sum of electronic and zero-point Energies=   | -3062.851690 |
| Sum of electronic and thermal Energies=      | -3062.806710 |
| Sum of electronic and thermal Enthalpies=    | -3062.805766 |
| Sum of electronic and thermal Free Energies= | -3062.928402 |

### 5.3 Optimized Structures of the Catalyst, Transition States and the Reaction Intermediates

Optimized Structure of  $[\text{L6-N(S)-Ni}]^+$  (**7a**)

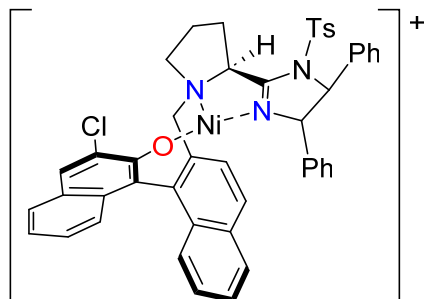

$[\text{Ni-L6-N(S)}]^+$  (**7a**)

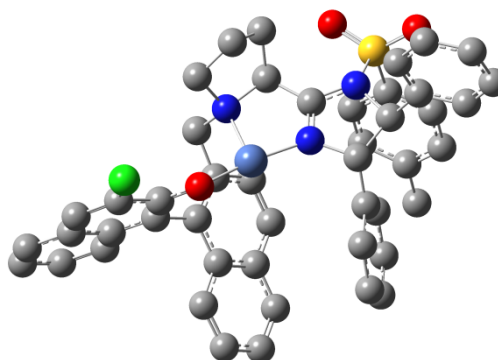

| Center Number | Atomic Number | Atomic Type | Coordinates (Angstroms) |           |           |
|---------------|---------------|-------------|-------------------------|-----------|-----------|
|               |               |             | X                       | Y         | Z         |
| 1             | 6             | 0           | 2.234124                | 13.635732 | 20.449426 |
| 2             | 1             | 0           | 2.029385                | 13.813048 | 22.566267 |
| 3             | 6             | 0           | 2.130112                | 13.138931 | 21.718302 |
| 4             | 6             | 0           | 2.393090                | 12.788939 | 19.302458 |
| 5             | 6             | 0           | 2.139570                | 11.739794 | 21.936313 |
| 6             | 8             | 0           | 2.526571                | 13.355774 | 18.123577 |
| 7             | 6             | 0           | 2.425264                | 11.399930 | 19.504416 |
| 8             | 6             | 0           | 2.004975                | 11.202579 | 23.237200 |
| 9             | 6             | 0           | 2.276643                | 10.857284 | 20.815121 |
| 10            | 6             | 0           | 2.592077                | 10.479050 | 18.347619 |
| 11            | 1             | 0           | 1.905155                | 11.891890 | 24.075092 |
| 12            | 6             | 0           | 1.996713                | 9.841183  | 23.441091 |
| 13            | 6             | 0           | 2.253825                | 9.459067  | 21.063657 |
| 14            | 6             | 0           | 3.834474                | 9.790654  | 18.172827 |
| 15            | 6             | 0           | 1.541729                | 10.229665 | 17.464692 |
| 16            | 1             | 0           | 1.890933                | 9.438337  | 24.446370 |
| 17            | 6             | 0           | 2.119124                | 8.966458  | 22.342037 |
| 18            | 1             | 0           | 2.340565                | 8.768935  | 20.226358 |
| 19            | 6             | 0           | 4.966568                | 10.060696 | 18.983636 |
| 20            | 6             | 0           | 3.956910                | 8.805202  | 17.140901 |

|    |    |   |           |           |           |
|----|----|---|-----------|-----------|-----------|
| 21 | 6  | 0 | 1.675384  | 9.241176  | 16.460101 |
| 22 | 6  | 0 | 0.272983  | 11.025852 | 17.550786 |
| 23 | 1  | 0 | 2.103903  | 7.890455  | 22.505795 |
| 24 | 1  | 0 | 4.891128  | 10.817463 | 19.762377 |
| 25 | 6  | 0 | 6.152204  | 9.389680  | 18.789453 |
| 26 | 6  | 0 | 5.185609  | 8.119603  | 16.980019 |
| 27 | 6  | 0 | 2.844553  | 8.540028  | 16.306426 |
| 28 | 1  | 0 | 0.821404  | 9.037731  | 15.812312 |
| 29 | 7  | 0 | 0.270742  | 12.198413 | 16.603072 |
| 30 | 1  | 0 | -0.616729 | 10.421086 | 17.330061 |
| 31 | 1  | 0 | 0.146898  | 11.448752 | 18.551682 |
| 32 | 1  | 0 | 7.011957  | 9.620275  | 19.415693 |
| 33 | 6  | 0 | 6.263741  | 8.405675  | 17.784519 |
| 34 | 1  | 0 | 5.262276  | 7.367044  | 16.195231 |
| 35 | 1  | 0 | 2.939327  | 7.774773  | 15.534876 |
| 36 | 6  | 0 | -0.587480 | 13.312119 | 17.134835 |
| 37 | 6  | 0 | -0.289208 | 11.878053 | 15.217032 |
| 38 | 1  | 0 | 7.206220  | 7.878989  | 17.645123 |
| 39 | 1  | 0 | -0.020025 | 13.872072 | 17.882805 |
| 40 | 1  | 0 | -1.463075 | 12.858684 | 17.622425 |
| 41 | 6  | 0 | -1.000637 | 14.074113 | 15.902686 |
| 42 | 6  | 0 | -1.370711 | 12.943187 | 14.953613 |
| 43 | 1  | 0 | -0.703577 | 10.863348 | 15.231481 |
| 44 | 6  | 0 | 0.833703  | 11.972677 | 14.241627 |
| 45 | 1  | 0 | -0.157831 | 14.664333 | 15.515316 |
| 46 | 1  | 0 | -1.833306 | 14.755598 | 16.096130 |
| 47 | 1  | 0 | -1.404305 | 13.234665 | 13.900507 |
| 48 | 1  | 0 | -2.350622 | 12.529465 | 15.214692 |
| 49 | 7  | 0 | 2.001725  | 12.346828 | 14.660082 |
| 50 | 7  | 0 | 0.746347  | 11.853446 | 12.879052 |
| 51 | 6  | 0 | 2.955978  | 12.439982 | 13.538607 |
| 52 | 16 | 0 | -0.338834 | 10.824289 | 12.014886 |
| 53 | 6  | 0 | 2.069755  | 12.187394 | 12.277568 |

|    |   |   |           |           |           |
|----|---|---|-----------|-----------|-----------|
| 54 | 1 | 0 | 3.335299  | 13.469006 | 13.516987 |
| 55 | 8 | 0 | -1.511587 | 10.711821 | 12.870159 |
| 56 | 8 | 0 | -0.387345 | 11.395914 | 10.681178 |
| 57 | 1 | 0 | 2.439137  | 11.306767 | 11.736163 |
| 58 | 6 | 0 | 4.111545  | 11.488297 | 13.731888 |
| 59 | 6 | 0 | 5.327564  | 11.967981 | 14.225584 |
| 60 | 6 | 0 | 3.983493  | 10.125361 | 13.446534 |
| 61 | 6 | 0 | 6.403730  | 11.103807 | 14.416128 |
| 62 | 1 | 0 | 5.433981  | 13.030321 | 14.447556 |
| 63 | 6 | 0 | 5.063454  | 9.265072  | 13.617077 |
| 64 | 1 | 0 | 3.033617  | 9.728706  | 13.085566 |
| 65 | 6 | 0 | 6.276688  | 9.752956  | 14.100588 |
| 66 | 1 | 0 | 7.347279  | 11.490573 | 14.796097 |
| 67 | 1 | 0 | 4.955701  | 8.207157  | 13.376858 |
| 68 | 1 | 0 | 7.119069  | 9.077177  | 14.239180 |
| 69 | 6 | 0 | 1.993216  | 13.357131 | 11.337867 |
| 70 | 6 | 0 | 2.714024  | 13.325515 | 10.143240 |
| 71 | 6 | 0 | 1.252839  | 14.496635 | 11.665311 |
| 72 | 6 | 0 | 2.701722  | 14.423352 | 9.286076  |
| 73 | 1 | 0 | 3.287523  | 12.433961 | 9.886653  |
| 74 | 6 | 0 | 1.235206  | 15.590251 | 10.805981 |
| 75 | 1 | 0 | 0.680598  | 14.521298 | 12.593450 |
| 76 | 6 | 0 | 1.961385  | 15.556398 | 9.615528  |
| 77 | 1 | 0 | 3.265384  | 14.390053 | 8.355536  |
| 78 | 1 | 0 | 0.651050  | 16.471630 | 11.063984 |
| 79 | 1 | 0 | 1.946357  | 16.412590 | 8.943707  |
| 80 | 6 | 0 | 0.515837  | 9.286093  | 11.959269 |
| 81 | 6 | 0 | 0.360824  | 8.384389  | 13.014173 |
| 82 | 6 | 0 | 1.415460  | 9.041332  | 10.919611 |
| 83 | 6 | 0 | 1.131678  | 7.230987  | 13.026915 |
| 84 | 1 | 0 | -0.363106 | 8.580894  | 13.803266 |
| 85 | 6 | 0 | 2.182147  | 7.882762  | 10.956740 |
| 86 | 1 | 0 | 1.510455  | 9.747826  | 10.096956 |

|    |    |   |          |           |           |
|----|----|---|----------|-----------|-----------|
| 87 | 6  | 0 | 2.062160 | 6.967486  | 12.010072 |
| 88 | 1  | 0 | 1.011945 | 6.516637  | 13.840879 |
| 89 | 1  | 0 | 2.892333 | 7.687152  | 10.154921 |
| 90 | 6  | 0 | 2.892707 | 5.725638  | 12.048752 |
| 91 | 1  | 0 | 3.198222 | 5.478817  | 13.072487 |
| 92 | 1  | 0 | 2.325552 | 4.863335  | 11.673088 |
| 93 | 1  | 0 | 3.791640 | 5.818403  | 11.430469 |
| 94 | 17 | 0 | 2.201233 | 15.361037 | 20.188746 |
| 95 | 28 | 0 | 2.136423 | 12.773562 | 16.465156 |

Number of imaginary frequency: 0

Energies:

|                                              |              |
|----------------------------------------------|--------------|
| Sum of electronic and zero-point Energies=   | -3231.540254 |
| Sum of electronic and thermal Energies=      | -3231.494923 |
| Sum of electronic and thermal Enthalpies=    | -3231.493979 |
| Sum of electronic and thermal Free Energies= | -3231.616390 |

Optimized Structure of  $[\text{L6-N(R)-Ni}]^+$  (**7b**)

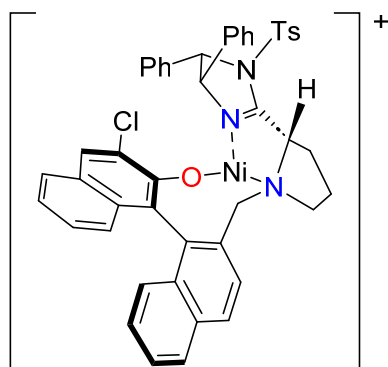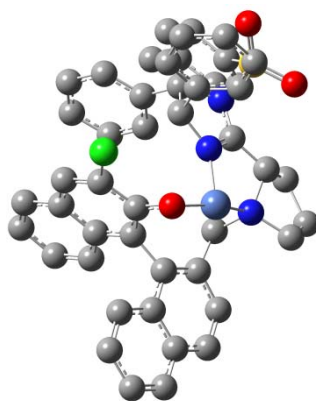

$[\text{Ni-L6-N(R)}]^+$  (**7b**)

| Center Number | Atomic Number | Atomic Type | Coordinates (Angstroms) |           |           |
|---------------|---------------|-------------|-------------------------|-----------|-----------|
|               |               |             | X                       | Y         | Z         |
| 1             | 6             | 0           | 4.624156                | -0.244272 | -2.115579 |
| 2             | 6             | 0           | 3.577003                | 0.165011  | -1.320170 |
| 3             | 6             | 0           | 3.184444                | -0.583904 | -0.181432 |
| 4             | 6             | 0           | 3.919969                | -1.773520 | 0.123038  |
| 5             | 6             | 0           | 4.994508                | -2.165835 | -0.710021 |

|    |   |   |           |           |           |
|----|---|---|-----------|-----------|-----------|
| 6  | 6 | 0 | 5.341593  | -1.418584 | -1.811720 |
| 7  | 1 | 0 | 4.898672  | 0.345849  | -2.987721 |
| 8  | 1 | 0 | 3.037189  | 1.073709  | -1.577415 |
| 9  | 6 | 0 | 2.085037  | -0.182476 | 0.657331  |
| 10 | 6 | 0 | 3.575931  | -2.515094 | 1.276341  |
| 11 | 1 | 0 | 5.540765  | -3.074185 | -0.458351 |
| 12 | 1 | 0 | 6.168592  | -1.729296 | -2.447246 |
| 13 | 6 | 0 | 2.512769  | -2.135176 | 2.052989  |
| 14 | 6 | 0 | 1.727669  | -0.993790 | 1.740469  |
| 15 | 1 | 0 | 4.170266  | -3.388735 | 1.540435  |
| 16 | 1 | 0 | 2.268138  | -2.701777 | 2.951061  |
| 17 | 6 | 0 | 1.558806  | 1.198881  | 0.399299  |
| 18 | 6 | 0 | 2.236188  | 2.296541  | 1.008587  |
| 19 | 6 | 0 | 0.589708  | 1.423541  | -0.594772 |
| 20 | 6 | 0 | 3.196251  | 2.125642  | 2.041077  |
| 21 | 6 | 0 | 1.957256  | 3.631789  | 0.564624  |
| 22 | 6 | 0 | 0.390360  | 2.766182  | -1.053303 |
| 23 | 6 | 0 | 3.826204  | 3.208948  | 2.611657  |
| 24 | 1 | 0 | 3.431839  | 1.121344  | 2.389652  |
| 25 | 6 | 0 | 2.618308  | 4.722893  | 1.174437  |
| 26 | 6 | 0 | 1.042541  | 3.833046  | -0.496501 |
| 27 | 6 | 0 | 3.536559  | 4.519859  | 2.179890  |
| 28 | 1 | 0 | 4.556460  | 3.052026  | 3.403444  |
| 29 | 1 | 0 | 2.387818  | 5.729392  | 0.826019  |
| 30 | 1 | 0 | 0.859338  | 4.842155  | -0.860937 |
| 31 | 1 | 0 | 4.037904  | 5.367219  | 2.643468  |
| 32 | 8 | 0 | -0.138476 | 0.438580  | -1.098598 |
| 33 | 6 | 0 | 0.528407  | -0.732890 | 2.618815  |
| 34 | 1 | 0 | 0.262525  | 0.329979  | 2.655676  |
| 35 | 1 | 0 | 0.727327  | -1.074681 | 3.642547  |
| 36 | 6 | 0 | -0.587484 | -2.934795 | 2.392644  |
| 37 | 6 | 0 | -1.965658 | -1.158002 | 2.764889  |
| 38 | 6 | 0 | -0.940121 | -2.980835 | 3.891338  |

|    |    |   |           |           |           |
|----|----|---|-----------|-----------|-----------|
| 39 | 1  | 0 | 0.395112  | -3.333732 | 2.139921  |
| 40 | 1  | 0 | -1.332928 | -3.451113 | 1.779870  |
| 41 | 6  | 0 | -1.747813 | -1.688867 | 4.173979  |
| 42 | 1  | 0 | -2.711334 | -1.808967 | 2.281939  |
| 43 | 1  | 0 | -1.524313 | -3.877672 | 4.115851  |
| 44 | 1  | 0 | -0.034763 | -3.021290 | 4.506333  |
| 45 | 1  | 0 | -2.692086 | -1.893063 | 4.676641  |
| 46 | 1  | 0 | -1.185893 | -0.975266 | 4.788349  |
| 47 | 7  | 0 | -0.674312 | -1.486656 | 2.055519  |
| 48 | 6  | 0 | -2.332198 | 0.217653  | 2.330620  |
| 49 | 7  | 0 | -1.887180 | 0.569027  | 1.154647  |
| 50 | 6  | 0 | -2.919599 | 2.437699  | 2.148701  |
| 51 | 1  | 0 | -3.892579 | 2.929898  | 2.048112  |
| 52 | 6  | 0 | -2.466272 | 1.863296  | 0.771176  |
| 53 | 1  | 0 | -1.686765 | 2.508944  | 0.351124  |
| 54 | 16 | 0 | -4.398072 | 1.006027  | 4.037017  |
| 55 | 8  | 0 | -4.452196 | -0.414697 | 4.342639  |
| 56 | 8  | 0 | -5.514493 | 1.702553  | 3.417218  |
| 57 | 7  | 0 | -3.080824 | 1.187021  | 2.933494  |
| 58 | 6  | 0 | -1.921103 | 3.364158  | 2.800357  |
| 59 | 6  | 0 | -1.956889 | 4.724666  | 2.479300  |
| 60 | 6  | 0 | -0.959967 | 2.903031  | 3.703640  |
| 61 | 6  | 0 | -1.046101 | 5.607914  | 3.051382  |
| 62 | 1  | 0 | -2.712229 | 5.093391  | 1.784460  |
| 63 | 6  | 0 | -0.051367 | 3.787576  | 4.280232  |
| 64 | 1  | 0 | -0.938260 | 1.849607  | 3.982044  |
| 65 | 6  | 0 | -0.092791 | 5.141835  | 3.955989  |
| 66 | 1  | 0 | -1.087327 | 6.665541  | 2.797676  |
| 67 | 1  | 0 | 0.687544  | 3.415845  | 4.988708  |
| 68 | 1  | 0 | 0.617421  | 5.833425  | 4.405689  |
| 69 | 6  | 0 | -3.598149 | 1.711900  | -0.216451 |
| 70 | 6  | 0 | -3.961824 | 2.818867  | -0.990901 |
| 71 | 6  | 0 | -4.341367 | 0.534263  | -0.323420 |

|    |    |   |           |           |           |
|----|----|---|-----------|-----------|-----------|
| 72 | 6  | 0 | -5.046677 | 2.749533  | -1.858027 |
| 73 | 1  | 0 | -3.382911 | 3.739629  | -0.915141 |
| 74 | 6  | 0 | -5.425965 | 0.463224  | -1.196204 |
| 75 | 1  | 0 | -4.073643 | -0.337942 | 0.272029  |
| 76 | 6  | 0 | -5.781469 | 1.569081  | -1.963655 |
| 77 | 1  | 0 | -5.315680 | 3.617325  | -2.457365 |
| 78 | 1  | 0 | -5.995405 | -0.461345 | -1.272639 |
| 79 | 1  | 0 | -6.628551 | 1.512377  | -2.644837 |
| 80 | 6  | 0 | -3.820360 | 1.933194  | 5.415032  |
| 81 | 6  | 0 | -3.995993 | 3.318292  | 5.412813  |
| 82 | 6  | 0 | -3.105869 | 1.288063  | 6.423575  |
| 83 | 6  | 0 | -3.422015 | 4.063577  | 6.432361  |
| 84 | 1  | 0 | -4.568813 | 3.802855  | 4.624455  |
| 85 | 6  | 0 | -2.547841 | 2.054322  | 7.438568  |
| 86 | 1  | 0 | -2.999698 | 0.205383  | 6.415827  |
| 87 | 6  | 0 | -2.680055 | 3.449311  | 7.451265  |
| 88 | 1  | 0 | -3.547940 | 5.145420  | 6.439087  |
| 89 | 1  | 0 | -1.996313 | 1.563121  | 8.238599  |
| 90 | 6  | 0 | -2.014192 | 4.270791  | 8.506187  |
| 91 | 1  | 0 | -1.770816 | 3.676321  | 9.392864  |
| 92 | 1  | 0 | -1.072346 | 4.690874  | 8.125955  |
| 93 | 1  | 0 | -2.635053 | 5.119355  | 8.814351  |
| 94 | 28 | 0 | -0.620932 | -0.583773 | 0.338588  |
| 95 | 17 | 0 | -0.724620 | 3.017672  | -2.368057 |

Number of imaginary frequency: 0

Energies:

|                                              |              |
|----------------------------------------------|--------------|
| Sum of electronic and zero-point Energies=   | -3231.506952 |
| Sum of electronic and thermal Energies=      | -3231.461777 |
| Sum of electronic and thermal Enthalpies=    | -3231.460833 |
| Sum of electronic and thermal Free Energies= | -3231.583386 |



## Optimized Structures of Key Intermediates 8

### Optimized Structure of 8a

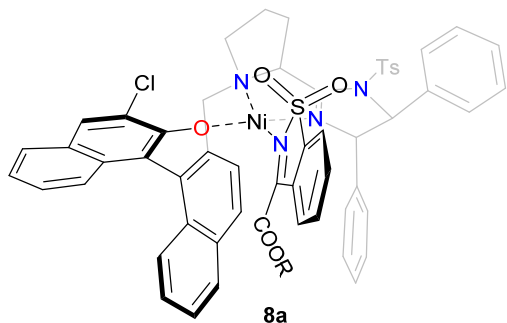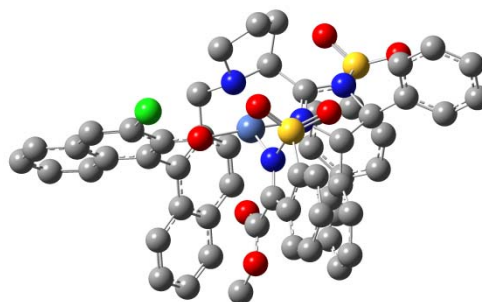

| Center Number | Atomic Number | Atomic Type | Coordinates (Angstroms) |           |           |
|---------------|---------------|-------------|-------------------------|-----------|-----------|
|               |               |             | X                       | Y         | Z         |
| 1             | 6             | 0           | 2.471564                | 13.382124 | 20.240459 |
| 2             | 1             | 0           | 2.343340                | 13.596279 | 22.358702 |
| 3             | 6             | 0           | 2.392364                | 12.906146 | 21.518568 |
| 4             | 6             | 0           | 2.560159                | 12.530869 | 19.080342 |
| 5             | 6             | 0           | 2.346389                | 11.512879 | 21.756271 |
| 6             | 8             | 0           | 2.694797                | 13.130427 | 17.924750 |
| 7             | 6             | 0           | 2.552035                | 11.139189 | 19.311349 |
| 8             | 6             | 0           | 2.214414                | 11.000270 | 23.068164 |
| 9             | 6             | 0           | 2.405435                | 10.620184 | 20.637650 |
| 10            | 6             | 0           | 2.575365                | 10.197245 | 18.163478 |
| 11            | 1             | 0           | 2.178529                | 11.706752 | 23.897584 |
| 12            | 6             | 0           | 2.121143                | 9.645753  | 23.292929 |
| 13            | 6             | 0           | 2.284321                | 9.230109  | 20.910157 |
| 14            | 6             | 0           | 3.659088                | 9.274735  | 17.986192 |
| 15            | 6             | 0           | 1.498037                | 10.152706 | 17.282499 |
| 16            | 1             | 0           | 2.016188                | 9.260492  | 24.305334 |
| 17            | 6             | 0           | 2.147800                | 8.759269  | 22.197393 |
| 18            | 1             | 0           | 2.290618                | 8.522370  | 20.084132 |
| 19            | 6             | 0           | 4.795353                | 9.262728  | 18.833326 |
| 20            | 6             | 0           | 3.611015                | 8.324159  | 16.916322 |
| 21            | 6             | 0           | 1.469207                | 9.204894  | 16.231695 |
| 22            | 6             | 0           | 0.339220                | 11.083920 | 17.451350 |

|    |    |   |           |           |           |
|----|----|---|-----------|-----------|-----------|
| 23 | 1  | 0 | 2.054844  | 7.687821  | 22.368299 |
| 24 | 1  | 0 | 4.863237  | 9.995168  | 19.635844 |
| 25 | 6  | 0 | 5.809282  | 8.347604  | 18.655542 |
| 26 | 6  | 0 | 4.672243  | 7.400907  | 16.753460 |
| 27 | 6  | 0 | 2.495129  | 8.316107  | 16.047389 |
| 28 | 1  | 0 | 0.597825  | 9.174001  | 15.577695 |
| 29 | 7  | 0 | 0.371041  | 12.234290 | 16.488648 |
| 30 | 1  | 0 | -0.623839 | 10.570438 | 17.320515 |
| 31 | 1  | 0 | 0.340719  | 11.520466 | 18.452847 |
| 32 | 1  | 0 | 6.669037  | 8.357284  | 19.323781 |
| 33 | 6  | 0 | 5.748787  | 7.403241  | 17.608858 |
| 34 | 1  | 0 | 4.612034  | 6.682032  | 15.935475 |
| 35 | 1  | 0 | 2.459765  | 7.584358  | 15.239383 |
| 36 | 6  | 0 | -0.354226 | 13.422273 | 17.071269 |
| 37 | 6  | 0 | -0.350387 | 11.920776 | 15.179862 |
| 38 | 1  | 0 | 6.554437  | 6.682520  | 17.479885 |
| 39 | 1  | 0 | 0.349517  | 13.998859 | 17.678778 |
| 40 | 1  | 0 | -1.154885 | 13.042165 | 17.721653 |
| 41 | 6  | 0 | -0.940442 | 14.135597 | 15.880368 |
| 42 | 6  | 0 | -1.470117 | 12.970151 | 15.060039 |
| 43 | 1  | 0 | -0.751945 | 10.903049 | 15.219616 |
| 44 | 6  | 0 | 0.634670  | 12.049927 | 14.074129 |
| 45 | 1  | 0 | -0.161735 | 14.688979 | 15.334619 |
| 46 | 1  | 0 | -1.720908 | 14.845266 | 16.168430 |
| 47 | 1  | 0 | -1.693019 | 13.209727 | 14.016582 |
| 48 | 1  | 0 | -2.383329 | 12.566875 | 15.512641 |
| 49 | 7  | 0 | 1.830396  | 12.481190 | 14.334109 |
| 50 | 7  | 0 | 0.369322  | 11.899239 | 12.737413 |
| 51 | 6  | 0 | 2.607007  | 12.627938 | 13.084732 |
| 52 | 16 | 0 | -0.758384 | 10.774796 | 12.052289 |
| 53 | 6  | 0 | 1.592488  | 12.243867 | 11.960932 |
| 54 | 1  | 0 | 2.871926  | 13.685829 | 12.988307 |
| 55 | 8  | 0 | -1.846061 | 10.691820 | 13.015904 |

|    |   |   |           |           |           |
|----|---|---|-----------|-----------|-----------|
| 56 | 8 | 0 | -0.946840 | 11.254163 | 10.694640 |
| 57 | 1 | 0 | 1.952280  | 11.338201 | 11.453840 |
| 58 | 6 | 0 | 3.858407  | 11.795071 | 13.074420 |
| 59 | 6 | 0 | 5.104869  | 12.404424 | 12.919895 |
| 60 | 6 | 0 | 3.784183  | 10.403872 | 13.186672 |
| 61 | 6 | 0 | 6.267739  | 11.635084 | 12.896593 |
| 62 | 1 | 0 | 5.158099  | 13.491133 | 12.827511 |
| 63 | 6 | 0 | 4.941700  | 9.633099  | 13.151090 |
| 64 | 1 | 0 | 2.808316  | 9.924837  | 13.302436 |
| 65 | 6 | 0 | 6.186453  | 10.248141 | 13.010434 |
| 66 | 1 | 0 | 7.236888  | 12.119469 | 12.784531 |
| 67 | 1 | 0 | 4.875255  | 8.548661  | 13.235721 |
| 68 | 1 | 0 | 7.092580  | 9.645324  | 12.987241 |
| 69 | 6 | 0 | 1.350660  | 13.327221 | 10.949872 |
| 70 | 6 | 0 | 1.899420  | 13.208433 | 9.672360  |
| 71 | 6 | 0 | 0.623629  | 14.473673 | 11.283185 |
| 72 | 6 | 0 | 1.725427  | 14.223471 | 8.734578  |
| 73 | 1 | 0 | 2.463991  | 12.311853 | 9.413153  |
| 74 | 6 | 0 | 0.443038  | 15.483830 | 10.344157 |
| 75 | 1 | 0 | 0.194226  | 14.571181 | 12.281199 |
| 76 | 6 | 0 | 0.994401  | 15.361082 | 9.068412  |
| 77 | 1 | 0 | 2.154344  | 14.120476 | 7.739534  |
| 78 | 1 | 0 | -0.130906 | 16.370296 | 10.607472 |
| 79 | 1 | 0 | 0.850793  | 16.151645 | 8.334237  |
| 80 | 6 | 0 | 0.127401  | 9.252174  | 12.014572 |
| 81 | 6 | 0 | -0.023972 | 8.346284  | 13.067033 |
| 82 | 6 | 0 | 1.017399  | 9.004657  | 10.967182 |
| 83 | 6 | 0 | 0.749700  | 7.194547  | 13.075360 |
| 84 | 1 | 0 | -0.756083 | 8.533495  | 13.850591 |
| 85 | 6 | 0 | 1.795549  | 7.853379  | 11.006343 |
| 86 | 1 | 0 | 1.086983  | 9.694057  | 10.127857 |
| 87 | 6 | 0 | 1.686921  | 6.940324  | 12.061882 |
| 88 | 1 | 0 | 0.627510  | 6.475620  | 13.884943 |

|     |    |   |          |           |           |
|-----|----|---|----------|-----------|-----------|
| 89  | 1  | 0 | 2.499360 | 7.656721  | 10.199117 |
| 90  | 6  | 0 | 2.540400 | 5.714526  | 12.113691 |
| 91  | 1  | 0 | 3.102567 | 5.663187  | 13.055682 |
| 92  | 1  | 0 | 1.932259 | 4.802306  | 12.065802 |
| 93  | 1  | 0 | 3.258788 | 5.684699  | 11.288279 |
| 94  | 17 | 0 | 2.481090 | 15.110422 | 19.978668 |
| 95  | 28 | 0 | 2.235309 | 12.819010 | 16.136412 |
| 96  | 6  | 0 | 5.905086 | 14.920032 | 15.480703 |
| 97  | 6  | 0 | 5.128154 | 16.058073 | 15.227357 |
| 98  | 6  | 0 | 5.659779 | 17.294862 | 14.927336 |
| 99  | 6  | 0 | 7.054667 | 17.389431 | 14.879298 |
| 100 | 6  | 0 | 7.853227 | 16.272682 | 15.119979 |
| 101 | 6  | 0 | 7.295550 | 15.029661 | 15.418095 |
| 102 | 6  | 0 | 5.052897 | 13.759715 | 15.750596 |
| 103 | 1  | 0 | 5.028183 | 18.158518 | 14.733960 |
| 104 | 1  | 0 | 7.516652 | 18.346717 | 14.650377 |
| 105 | 1  | 0 | 8.934893 | 16.368593 | 15.072728 |
| 106 | 1  | 0 | 7.931718 | 14.170614 | 15.598944 |
| 107 | 16 | 0 | 3.414865 | 15.629903 | 15.328834 |
| 108 | 8  | 0 | 2.767913 | 15.681336 | 14.023586 |
| 109 | 8  | 0 | 2.752209 | 16.206915 | 16.485505 |
| 110 | 6  | 0 | 5.481635 | 12.357295 | 16.079495 |
| 111 | 8  | 0 | 4.681923 | 11.457123 | 16.209819 |
| 112 | 8  | 0 | 6.800651 | 12.263603 | 16.205045 |
| 113 | 6  | 0 | 7.297625 | 10.946904 | 16.520471 |
| 114 | 1  | 0 | 6.822835 | 10.201775 | 15.876865 |
| 115 | 1  | 0 | 8.372315 | 10.993158 | 16.344272 |
| 116 | 1  | 0 | 7.086619 | 10.723153 | 17.569939 |
| 117 | 7  | 0 | 3.770242 | 13.949511 | 15.686154 |

Number of imaginary frequency: 0

Energies:

|                                              |              |
|----------------------------------------------|--------------|
| Sum of electronic and zero-point Energies=   | -4332.478286 |
| Sum of electronic and thermal Energies=      | -4332.419199 |
| Sum of electronic and thermal Enthalpies=    | -4332.418255 |
| Sum of electronic and thermal Free Energies= | -4332.568530 |

### Optimized Structure of **8b**

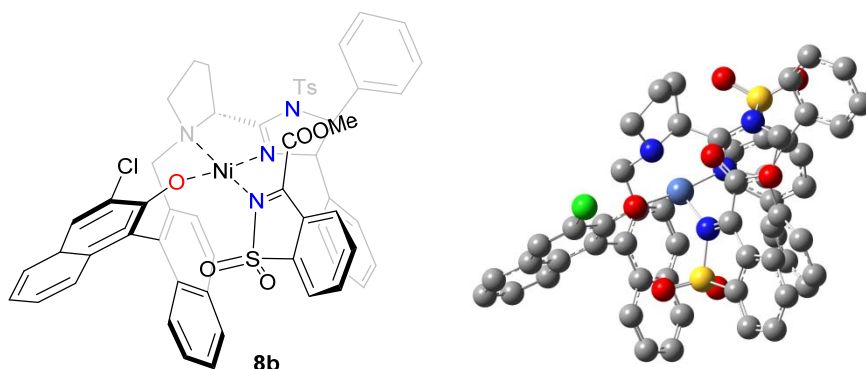

| Center Number | Atomic Number | Atomic Type | Coordinates (Angstroms) |           |           |
|---------------|---------------|-------------|-------------------------|-----------|-----------|
|               |               |             | X                       | Y         | Z         |
| 1             | 6             | 0           | 2.207376                | 13.507484 | 20.283853 |
| 2             | 1             | 0           | 2.263454                | 13.681965 | 22.409014 |
| 3             | 6             | 0           | 2.295194                | 13.010187 | 21.553348 |
| 4             | 6             | 0           | 2.246322                | 12.681153 | 19.107248 |
| 5             | 6             | 0           | 2.413192                | 11.616173 | 21.761722 |
| 6             | 8             | 0           | 2.122483                | 13.305816 | 17.962614 |
| 7             | 6             | 0           | 2.418727                | 11.298224 | 19.300014 |
| 8             | 6             | 0           | 2.468591                | 11.074415 | 23.067796 |
| 9             | 6             | 0           | 2.460429                | 10.750022 | 20.622069 |
| 10            | 6             | 0           | 2.525619                | 10.386346 | 18.131784 |
| 11            | 1             | 0           | 2.438479                | 11.761516 | 23.913607 |
| 12            | 6             | 0           | 2.552423                | 9.715667  | 23.268783 |
| 13            | 6             | 0           | 2.525030                | 9.352305  | 20.872275 |
| 14            | 6             | 0           | 3.728430                | 9.632046  | 17.917975 |
| 15            | 6             | 0           | 1.449662                | 10.201258 | 17.261644 |
| 16            | 1             | 0           | 2.594320                | 9.308645  | 24.277272 |
| 17            | 6             | 0           | 2.570052                | 8.852287  | 22.154808 |

|    |   |   |           |           |           |
|----|---|---|-----------|-----------|-----------|
| 18 | 1 | 0 | 2.531291  | 8.661661  | 20.031686 |
| 19 | 6 | 0 | 4.883321  | 9.796836  | 18.725395 |
| 20 | 6 | 0 | 3.790659  | 8.681387  | 16.848667 |
| 21 | 6 | 0 | 1.530151  | 9.253633  | 16.212956 |
| 22 | 6 | 0 | 0.193248  | 11.002158 | 17.426139 |
| 23 | 1 | 0 | 2.615866  | 7.775094  | 22.308040 |
| 24 | 1 | 0 | 4.869010  | 10.538373 | 19.520099 |
| 25 | 6 | 0 | 6.023140  | 9.061165  | 18.497929 |
| 26 | 6 | 0 | 4.978075  | 7.937387  | 16.640244 |
| 27 | 6 | 0 | 2.664910  | 8.511636  | 16.010745 |
| 28 | 1 | 0 | 0.661135  | 9.102890  | 15.571188 |
| 29 | 7 | 0 | 0.123332  | 12.147066 | 16.456337 |
| 30 | 1 | 0 | -0.709546 | 10.390856 | 17.287717 |
| 31 | 1 | 0 | 0.145616  | 11.441251 | 18.425761 |
| 32 | 1 | 0 | 6.897388  | 9.213471  | 19.128789 |
| 33 | 6 | 0 | 6.073845  | 8.117501  | 17.449993 |
| 34 | 1 | 0 | 5.002611  | 7.219806  | 15.819336 |
| 35 | 1 | 0 | 2.711485  | 7.773329  | 15.209402 |
| 36 | 6 | 0 | -0.710170 | 13.273820 | 17.014359 |
| 37 | 6 | 0 | -0.530541 | 11.765199 | 15.136838 |
| 38 | 1 | 0 | 6.982252  | 7.541569  | 17.281259 |
| 39 | 1 | 0 | -0.062403 | 13.921510 | 17.610893 |
| 40 | 1 | 0 | -1.473439 | 12.831810 | 17.669826 |
| 41 | 6 | 0 | -1.353461 | 13.909223 | 15.807388 |
| 42 | 6 | 0 | -1.751435 | 12.689150 | 14.994758 |
| 43 | 1 | 0 | -0.824649 | 10.710370 | 15.166139 |
| 44 | 6 | 0 | 0.463695  | 12.002658 | 14.056088 |
| 45 | 1 | 0 | -0.628148 | 14.531089 | 15.264372 |
| 46 | 1 | 0 | -2.205606 | 14.538166 | 16.079979 |
| 47 | 1 | 0 | -1.982504 | 12.897697 | 13.947472 |
| 48 | 1 | 0 | -2.622453 | 12.194819 | 15.439592 |
| 49 | 7 | 0 | 1.639779  | 12.467665 | 14.352229 |
| 50 | 7 | 0 | 0.211329  | 11.919800 | 12.710307 |

|    |    |   |           |           |           |
|----|----|---|-----------|-----------|-----------|
| 51 | 6  | 0 | 2.410283  | 12.719115 | 13.118370 |
| 52 | 16 | 0 | -0.771116 | 10.717032 | 11.940175 |
| 53 | 6  | 0 | 1.363565  | 12.490568 | 11.978834 |
| 54 | 1  | 0 | 2.699341  | 13.776255 | 13.099882 |
| 55 | 8  | 0 | -1.903585 | 10.521575 | 12.832450 |
| 56 | 8  | 0 | -0.912630 | 11.214571 | 10.582958 |
| 57 | 1  | 0 | 1.752411  | 11.742589 | 11.274645 |
| 58 | 6  | 0 | 3.654684  | 11.885113 | 13.005359 |
| 59 | 6  | 0 | 4.878550  | 12.505330 | 12.747000 |
| 60 | 6  | 0 | 3.590460  | 10.491537 | 13.084718 |
| 61 | 6  | 0 | 6.033314  | 11.745229 | 12.582333 |
| 62 | 1  | 0 | 4.916749  | 13.594173 | 12.664314 |
| 63 | 6  | 0 | 4.742437  | 9.731266  | 12.908109 |
| 64 | 1  | 0 | 2.629771  | 10.005704 | 13.273604 |
| 65 | 6  | 0 | 5.964965  | 10.356372 | 12.664025 |
| 66 | 1  | 0 | 6.984988  | 12.239487 | 12.392162 |
| 67 | 1  | 0 | 4.690818  | 8.644183  | 12.959460 |
| 68 | 1  | 0 | 6.864770  | 9.757993  | 12.532749 |
| 69 | 6  | 0 | 1.010355  | 13.762617 | 11.249783 |
| 70 | 6  | 0 | 1.945539  | 14.296171 | 10.356065 |
| 71 | 6  | 0 | -0.180694 | 14.451480 | 11.484998 |
| 72 | 6  | 0 | 1.687365  | 15.494965 | 9.698871  |
| 73 | 1  | 0 | 2.876940  | 13.760173 | 10.168025 |
| 74 | 6  | 0 | -0.437993 | 15.652581 | 10.825245 |
| 75 | 1  | 0 | -0.918850 | 14.037055 | 12.170720 |
| 76 | 6  | 0 | 0.493114  | 16.176660 | 9.931916  |
| 77 | 1  | 0 | 2.417135  | 15.894094 | 8.996796  |
| 78 | 1  | 0 | -1.374220 | 16.176869 | 11.009173 |
| 79 | 1  | 0 | 0.287300  | 17.111220 | 9.413011  |
| 80 | 6  | 0 | 0.227942  | 9.267676  | 11.940126 |
| 81 | 6  | 0 | 0.100339  | 8.363048  | 12.997121 |
| 82 | 6  | 0 | 1.160992  | 9.070291  | 10.921028 |
| 83 | 6  | 0 | 0.936366  | 7.256988  | 13.035130 |

|     |    |   |           |           |           |
|-----|----|---|-----------|-----------|-----------|
| 84  | 1  | 0 | -0.657772 | 8.518296  | 13.762800 |
| 85  | 6  | 0 | 1.992435  | 7.958069  | 10.984433 |
| 86  | 1  | 0 | 1.226985  | 9.767940  | 10.088252 |
| 87  | 6  | 0 | 1.902847  | 7.042818  | 12.040204 |
| 88  | 1  | 0 | 0.837454  | 6.540624  | 13.850270 |
| 89  | 1  | 0 | 2.729787  | 7.797607  | 10.199482 |
| 90  | 6  | 0 | 2.812437  | 5.859197  | 12.113539 |
| 91  | 1  | 0 | 3.325520  | 5.809989  | 13.082981 |
| 92  | 1  | 0 | 2.252409  | 4.920682  | 12.011959 |
| 93  | 1  | 0 | 3.572869  | 5.882464  | 11.326413 |
| 94  | 17 | 0 | 2.040840  | 15.234554 | 20.052357 |
| 95  | 28 | 0 | 1.975979  | 12.801950 | 16.175492 |
| 96  | 6  | 0 | 5.469522  | 14.998812 | 15.250975 |
| 97  | 6  | 0 | 6.240771  | 13.998456 | 15.852819 |
| 98  | 6  | 0 | 7.619014  | 14.029129 | 15.900065 |
| 99  | 6  | 0 | 8.249239  | 15.129789 | 15.308914 |
| 100 | 6  | 0 | 7.503891  | 16.146820 | 14.714254 |
| 101 | 6  | 0 | 6.110930  | 16.098124 | 14.677588 |
| 102 | 6  | 0 | 4.046276  | 14.672660 | 15.320634 |
| 103 | 1  | 0 | 8.193103  | 13.236099 | 16.372824 |
| 104 | 1  | 0 | 9.334727  | 15.190003 | 15.319414 |
| 105 | 1  | 0 | 8.015586  | 16.994850 | 14.266301 |
| 106 | 1  | 0 | 5.544971  | 16.894734 | 14.205980 |
| 107 | 16 | 0 | 5.174894  | 12.763940 | 16.544432 |
| 108 | 8  | 0 | 5.119685  | 12.877332 | 17.992081 |
| 109 | 8  | 0 | 5.308453  | 11.473689 | 15.895829 |
| 110 | 6  | 0 | 2.918198  | 15.504093 | 14.779016 |
| 111 | 8  | 0 | 1.792493  | 15.451960 | 15.229867 |
| 112 | 8  | 0 | 3.315618  | 16.243054 | 13.749483 |
| 113 | 6  | 0 | 2.277446  | 17.034267 | 13.127001 |
| 114 | 1  | 0 | 1.884123  | 17.758097 | 13.845699 |
| 115 | 1  | 0 | 2.763370  | 17.539006 | 12.293063 |
| 116 | 1  | 0 | 1.472715  | 16.380778 | 12.775607 |



|     |   |   |          |           |           |
|-----|---|---|----------|-----------|-----------|
| 117 | 7 | 0 | 3.724827 | 13.550234 | 15.891408 |
|-----|---|---|----------|-----------|-----------|

Number of imaginary frequency: 0

Energies:

|                                              |              |
|----------------------------------------------|--------------|
| Sum of electronic and zero-point Energies=   | -4332.481336 |
| Sum of electronic and thermal Energies=      | -4332.422391 |
| Sum of electronic and thermal Enthalpies=    | -4332.421447 |
| Sum of electronic and thermal Free Energies= | -4332.571015 |

Optimized transition states for Friedel-Crafts reaction of **2p**

Structure for transition state **9a**

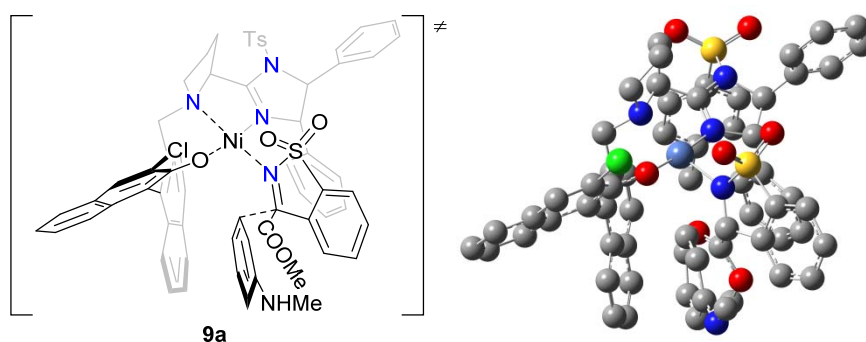

| Center Number | Atomic Number | Atomic Type | Coordinates (Angstroms) |           |           |
|---------------|---------------|-------------|-------------------------|-----------|-----------|
|               |               |             | X                       | Y         | Z         |
| 1             | 6             | 0           | 2.156152                | 13.662224 | 20.175049 |
| 2             | 1             | 0           | 1.955059                | 13.957778 | 22.277493 |
| 3             | 6             | 0           | 2.117744                | 13.242156 | 21.473885 |
| 4             | 6             | 0           | 2.383947                | 12.775433 | 19.062095 |
| 5             | 6             | 0           | 2.263515                | 11.869936 | 21.781504 |
| 6             | 8             | 0           | 2.470133                | 13.329605 | 17.880751 |
| 7             | 6             | 0           | 2.545631                | 11.406789 | 19.361245 |
| 8             | 6             | 0           | 2.194445                | 11.415180 | 23.118544 |
| 9             | 6             | 0           | 2.451613                | 10.936947 | 20.710804 |
| 10            | 6             | 0           | 2.734073                | 10.437643 | 18.252172 |
| 11            | 1             | 0           | 2.056349                | 12.153859 | 23.908105 |
| 12            | 6             | 0           | 2.288314                | 10.074928 | 23.416188 |

|    |   |   |           |           |           |
|----|---|---|-----------|-----------|-----------|
| 13 | 6 | 0 | 2.518676  | 9.559760  | 21.057328 |
| 14 | 6 | 0 | 3.934898  | 9.662559  | 18.156147 |
| 15 | 6 | 0 | 1.721775  | 10.233321 | 17.316120 |
| 16 | 1 | 0 | 2.232898  | 9.733505  | 24.448081 |
| 17 | 6 | 0 | 2.441287  | 9.143911  | 22.368748 |
| 18 | 1 | 0 | 2.627040  | 8.816268  | 20.270384 |
| 19 | 6 | 0 | 5.036059  | 9.864998  | 19.026289 |
| 20 | 6 | 0 | 4.052150  | 8.653448  | 17.146809 |
| 21 | 6 | 0 | 1.871787  | 9.259040  | 16.300424 |
| 22 | 6 | 0 | 0.443779  | 11.011244 | 17.399929 |
| 23 | 1 | 0 | 2.493717  | 8.080238  | 22.596628 |
| 24 | 1 | 0 | 4.975143  | 10.646780 | 19.781815 |
| 25 | 6 | 0 | 6.173883  | 9.095090  | 18.929451 |
| 26 | 6 | 0 | 5.228879  | 7.869453  | 17.080148 |
| 27 | 6 | 0 | 2.996047  | 8.478031  | 16.222206 |
| 28 | 1 | 0 | 1.057692  | 9.121626  | 15.586374 |
| 29 | 7 | 0 | 0.397012  | 12.173818 | 16.449883 |
| 30 | 1 | 0 | -0.427355 | 10.373665 | 17.195892 |
| 31 | 1 | 0 | 0.315889  | 11.423026 | 18.403819 |
| 32 | 1 | 0 | 7.004904  | 9.271351  | 19.611213 |
| 33 | 6 | 0 | 6.268927  | 8.076573  | 17.957046 |
| 34 | 1 | 0 | 5.298422  | 7.102773  | 16.307686 |
| 35 | 1 | 0 | 3.092822  | 7.715235  | 15.447989 |
| 36 | 6 | 0 | -0.385998 | 13.314427 | 17.047874 |
| 37 | 6 | 0 | -0.316101 | 11.839508 | 15.149696 |
| 38 | 1 | 0 | 7.169206  | 7.467289  | 17.896212 |
| 39 | 1 | 0 | 0.283255  | 13.911339 | 17.671587 |
| 40 | 1 | 0 | -1.180308 | 12.887277 | 17.676886 |
| 41 | 6 | 0 | -0.983658 | 14.024841 | 15.863013 |
| 42 | 6 | 0 | -1.469793 | 12.853575 | 15.026624 |
| 43 | 1 | 0 | -0.681389 | 10.806428 | 15.193439 |
| 44 | 6 | 0 | 0.660924  | 11.994577 | 14.041650 |
| 45 | 1 | 0 | -0.213867 | 14.604917 | 15.332613 |

|    |    |   |           |           |           |
|----|----|---|-----------|-----------|-----------|
| 46 | 1  | 0 | -1.786483 | 14.709118 | 16.151860 |
| 47 | 1  | 0 | -1.689195 | 13.097002 | 13.983876 |
| 48 | 1  | 0 | -2.374794 | 12.418591 | 15.465939 |
| 49 | 7  | 0 | 1.877846  | 12.375173 | 14.284498 |
| 50 | 7  | 0 | 0.337976  | 11.921908 | 12.706861 |
| 51 | 6  | 0 | 2.605814  | 12.567638 | 13.010592 |
| 52 | 16 | 0 | -0.772090 | 10.791219 | 12.015779 |
| 53 | 6  | 0 | 1.529819  | 12.316555 | 11.905536 |
| 54 | 1  | 0 | 2.918275  | 13.614850 | 12.982928 |
| 55 | 8  | 0 | -1.865196 | 10.681296 | 12.970900 |
| 56 | 8  | 0 | -0.965620 | 11.267531 | 10.656901 |
| 57 | 1  | 0 | 1.833143  | 11.460764 | 11.287037 |
| 58 | 6  | 0 | 3.804745  | 11.678479 | 12.840011 |
| 59 | 6  | 0 | 5.038727  | 12.242334 | 12.514244 |
| 60 | 6  | 0 | 3.679564  | 10.286403 | 12.891809 |
| 61 | 6  | 0 | 6.131882  | 11.427899 | 12.223277 |
| 62 | 1  | 0 | 5.134396  | 13.328598 | 12.476631 |
| 63 | 6  | 0 | 4.770290  | 9.471977  | 12.606472 |
| 64 | 1  | 0 | 2.715169  | 9.840588  | 13.149722 |
| 65 | 6  | 0 | 5.996425  | 10.042026 | 12.260157 |
| 66 | 1  | 0 | 7.090592  | 11.878259 | 11.969725 |
| 67 | 1  | 0 | 4.668617  | 8.387635  | 12.649930 |
| 68 | 1  | 0 | 6.848460  | 9.404698  | 12.028559 |
| 69 | 6  | 0 | 1.247400  | 13.501173 | 11.026669 |
| 70 | 6  | 0 | 1.520155  | 13.441524 | 9.660028  |
| 71 | 6  | 0 | 0.737333  | 14.682287 | 11.574395 |
| 72 | 6  | 0 | 1.285713  | 14.548044 | 8.846322  |
| 73 | 1  | 0 | 1.914210  | 12.518616 | 9.232917  |
| 74 | 6  | 0 | 0.497760  | 15.785494 | 10.762541 |
| 75 | 1  | 0 | 0.535392  | 14.735492 | 12.644645 |
| 76 | 6  | 0 | 0.771729  | 15.720014 | 9.396132  |
| 77 | 1  | 0 | 1.499891  | 14.491832 | 7.780503  |
| 78 | 1  | 0 | 0.098049  | 16.700386 | 11.196343 |

|     |    |   |           |           |           |
|-----|----|---|-----------|-----------|-----------|
| 79  | 1  | 0 | 0.582283  | 16.583905 | 8.761468  |
| 80  | 6  | 0 | 0.134078  | 9.281390  | 11.981003 |
| 81  | 6  | 0 | 0.127712  | 8.465389  | 13.114234 |
| 82  | 6  | 0 | 0.908019  | 8.967097  | 10.863409 |
| 83  | 6  | 0 | 0.912196  | 7.320940  | 13.120935 |
| 84  | 1  | 0 | -0.491551 | 8.722253  | 13.972181 |
| 85  | 6  | 0 | 1.688936  | 7.817298  | 10.893130 |
| 86  | 1  | 0 | 0.891207  | 9.609260  | 9.984983  |
| 87  | 6  | 0 | 1.706445  | 6.980287  | 12.015280 |
| 88  | 1  | 0 | 0.908143  | 6.674264  | 13.997940 |
| 89  | 1  | 0 | 2.299255  | 7.563465  | 10.027834 |
| 90  | 6  | 0 | 2.545476  | 5.743609  | 12.038569 |
| 91  | 1  | 0 | 3.048381  | 5.617230  | 13.004936 |
| 92  | 1  | 0 | 1.928766  | 4.847900  | 11.886226 |
| 93  | 1  | 0 | 3.306310  | 5.755407  | 11.251221 |
| 94  | 17 | 0 | 1.906862  | 15.361156 | 19.831056 |
| 95  | 28 | 0 | 2.269184  | 12.805774 | 16.087815 |
| 96  | 6  | 0 | 6.145023  | 14.618313 | 15.569392 |
| 97  | 6  | 0 | 5.397641  | 15.732868 | 15.197900 |
| 98  | 6  | 0 | 5.959765  | 16.950976 | 14.847311 |
| 99  | 6  | 0 | 7.349367  | 17.046653 | 14.865838 |
| 100 | 6  | 0 | 8.123164  | 15.939818 | 15.217073 |
| 101 | 6  | 0 | 7.536479  | 14.724600 | 15.573155 |
| 102 | 6  | 0 | 5.256792  | 13.492741 | 16.036618 |
| 103 | 1  | 0 | 5.336946  | 17.798707 | 14.568293 |
| 104 | 1  | 0 | 7.831316  | 17.984333 | 14.597313 |
| 105 | 1  | 0 | 9.208288  | 16.021992 | 15.214466 |
| 106 | 1  | 0 | 8.157819  | 13.877084 | 15.842051 |
| 107 | 16 | 0 | 3.674528  | 15.359300 | 15.308880 |
| 108 | 8  | 0 | 3.004493  | 15.496186 | 14.006932 |
| 109 | 8  | 0 | 3.054228  | 16.122208 | 16.402631 |
| 110 | 6  | 0 | 5.609321  | 12.051994 | 15.717709 |
| 111 | 8  | 0 | 4.802016  | 11.153263 | 15.785506 |

|     |   |   |          |           |           |
|-----|---|---|----------|-----------|-----------|
| 112 | 8 | 0 | 6.912572 | 11.897943 | 15.456689 |
| 113 | 6 | 0 | 7.367073 | 10.536585 | 15.378354 |
| 114 | 1 | 0 | 6.702477 | 9.941960  | 14.748255 |
| 115 | 1 | 0 | 8.368921 | 10.585682 | 14.949527 |
| 116 | 1 | 0 | 7.401262 | 10.105433 | 16.385318 |
| 117 | 7 | 0 | 3.926439 | 13.755257 | 15.653098 |
| 118 | 6 | 0 | 6.799121 | 12.984665 | 18.211155 |
| 119 | 6 | 0 | 5.098084 | 14.751967 | 18.311293 |
| 120 | 6 | 0 | 7.716252 | 13.832765 | 18.739604 |
| 121 | 1 | 0 | 7.073884 | 11.943797 | 18.043887 |
| 122 | 6 | 0 | 6.013120 | 15.618831 | 18.815317 |
| 123 | 1 | 0 | 4.068349 | 15.069472 | 18.166041 |
| 124 | 6 | 0 | 7.368264 | 15.199961 | 18.997902 |
| 125 | 1 | 0 | 8.724688 | 13.498352 | 18.978968 |
| 126 | 1 | 0 | 5.721331 | 16.628416 | 19.095515 |
| 127 | 7 | 0 | 8.303555 | 16.046617 | 19.415864 |
| 128 | 1 | 0 | 9.244964 | 15.686000 | 19.527107 |
| 129 | 6 | 0 | 8.097291 | 17.457930 | 19.665543 |
| 130 | 1 | 0 | 7.364831 | 17.611735 | 20.465600 |
| 131 | 1 | 0 | 9.048009 | 17.896260 | 19.969381 |
| 132 | 1 | 0 | 7.743574 | 17.961956 | 18.758431 |
| 133 | 6 | 0 | 5.459916 | 13.424192 | 17.838775 |
| 134 | 1 | 0 | 4.689862 | 12.664571 | 18.013977 |

Imaginary frequency: -106.5 cm<sup>-1</sup>.

Energies:

|                                              |              |
|----------------------------------------------|--------------|
| Sum of electronic and zero-point Energies=   | -4659.262738 |
| Sum of electronic and thermal Energies=      | -4659.196626 |
| Sum of electronic and thermal Enthalpies=    | -4659.195682 |
| Sum of electronic and thermal Free Energies= | -4659.360039 |

Structure for transition state **9b**

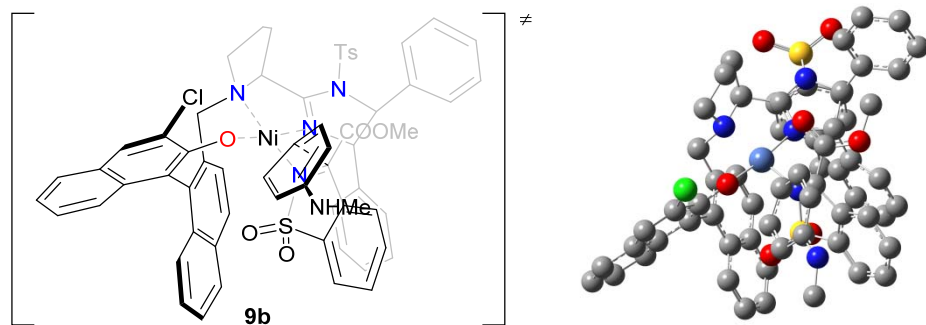

| Center Number | Atomic Number | Atomic Type | Coordinates (Angstroms) |           |           |
|---------------|---------------|-------------|-------------------------|-----------|-----------|
|               |               |             | X                       | Y         | Z         |
| 1             | 6             | 0           | 2.062330                | 13.698051 | 20.137697 |
| 2             | 1             | 0           | 2.002726                | 13.921220 | 22.258444 |
| 3             | 6             | 0           | 2.148596                | 13.239896 | 21.422122 |
| 4             | 6             | 0           | 2.250866                | 12.864573 | 18.978324 |
| 5             | 6             | 0           | 2.396950                | 11.871039 | 21.669189 |
| 6             | 8             | 0           | 2.155475                | 13.455485 | 17.814115 |
| 7             | 6             | 0           | 2.522698                | 11.501702 | 19.216554 |
| 8             | 6             | 0           | 2.456110                | 11.366956 | 22.990094 |
| 9             | 6             | 0           | 2.558056                | 10.988076 | 20.552586 |
| 10            | 6             | 0           | 2.701906                | 10.564795 | 18.077447 |
| 11            | 1             | 0           | 2.337902                | 12.069306 | 23.815501 |
| 12            | 6             | 0           | 2.647369                | 10.025584 | 23.228941 |
| 13            | 6             | 0           | 2.724618                | 9.605546  | 20.842009 |
| 14            | 6             | 0           | 3.946665                | 9.878770  | 17.885425 |
| 15            | 6             | 0           | 1.636971                | 10.286791 | 17.219750 |
| 16            | 1             | 0           | 2.690526                | 9.646774  | 24.248361 |
| 17            | 6             | 0           | 2.769682                | 9.141166  | 22.138000 |
| 18            | 1             | 0           | 2.812739                | 8.896489  | 20.021926 |
| 19            | 6             | 0           | 5.080194                | 10.119483 | 18.703202 |
| 20            | 6             | 0           | 4.070969                | 8.912611  | 16.836599 |
| 21            | 6             | 0           | 1.779512                | 9.328349  | 16.188589 |
| 22            | 6             | 0           | 0.320148                | 10.980310 | 17.396433 |

|    |    |   |           |           |           |
|----|----|---|-----------|-----------|-----------|
| 23 | 1  | 0 | 2.897343  | 8.074934  | 22.319686 |
| 24 | 1  | 0 | 5.012733  | 10.870000 | 19.486229 |
| 25 | 6  | 0 | 6.261572  | 9.445080  | 18.501094 |
| 26 | 6  | 0 | 5.300702  | 8.234129  | 16.651851 |
| 27 | 6  | 0 | 2.959714  | 8.656751  | 16.000273 |
| 28 | 1  | 0 | 0.923608  | 9.111141  | 15.547109 |
| 29 | 7  | 0 | 0.135754  | 12.119452 | 16.435425 |
| 30 | 1  | 0 | -0.523941 | 10.287652 | 17.266465 |
| 31 | 1  | 0 | 0.244246  | 11.404654 | 18.400794 |
| 32 | 1  | 0 | 7.118995  | 9.655739  | 19.138262 |
| 33 | 6  | 0 | 6.377154  | 8.491822  | 17.467018 |
| 34 | 1  | 0 | 5.373939  | 7.502156  | 15.846831 |
| 35 | 1  | 0 | 3.055717  | 7.914481  | 15.206669 |
| 36 | 6  | 0 | -0.736409 | 13.188158 | 17.036521 |
| 37 | 6  | 0 | -0.562179 | 11.695503 | 15.156286 |
| 38 | 1  | 0 | 7.318798  | 7.966195  | 17.316277 |
| 39 | 1  | 0 | -0.107546 | 13.859204 | 17.627871 |
| 40 | 1  | 0 | -1.463174 | 12.699802 | 17.701746 |
| 41 | 6  | 0 | -1.439656 | 13.810186 | 15.856010 |
| 42 | 6  | 0 | -1.815958 | 12.580904 | 15.045992 |
| 43 | 1  | 0 | -0.825960 | 10.632469 | 15.219395 |
| 44 | 6  | 0 | 0.375141  | 11.931216 | 14.025933 |
| 45 | 1  | 0 | -0.751679 | 14.457725 | 15.294899 |
| 46 | 1  | 0 | -2.305651 | 14.407004 | 16.156359 |
| 47 | 1  | 0 | -2.076496 | 12.788554 | 14.005291 |
| 48 | 1  | 0 | -2.662308 | 12.059084 | 15.506683 |
| 49 | 7  | 0 | 1.551545  | 12.431637 | 14.246218 |
| 50 | 7  | 0 | 0.043966  | 11.812137 | 12.695112 |
| 51 | 6  | 0 | 2.241660  | 12.675969 | 12.965333 |
| 52 | 16 | 0 | -0.934408 | 10.557484 | 12.020776 |
| 53 | 6  | 0 | 1.156324  | 12.351835 | 11.882856 |
| 54 | 1  | 0 | 2.481128  | 13.743346 | 12.907980 |
| 55 | 8  | 0 | -2.023898 | 10.364768 | 12.966675 |

|    |   |   |           |           |           |
|----|---|---|-----------|-----------|-----------|
| 56 | 8 | 0 | -1.151873 | 10.990026 | 10.650676 |
| 57 | 1 | 0 | 1.537258  | 11.561717 | 11.221162 |
| 58 | 6 | 0 | 3.506707  | 11.885500 | 12.792881 |
| 59 | 6 | 0 | 4.668098  | 12.530289 | 12.365429 |
| 60 | 6 | 0 | 3.516288  | 10.501458 | 12.980062 |
| 61 | 6 | 0 | 5.829965  | 11.801137 | 12.127531 |
| 62 | 1 | 0 | 4.653918  | 13.612290 | 12.216815 |
| 63 | 6 | 0 | 4.679061  | 9.773363  | 12.750504 |
| 64 | 1 | 0 | 2.606913  | 9.995886  | 13.314748 |
| 65 | 6 | 0 | 5.837102  | 10.421924 | 12.322533 |
| 66 | 1 | 0 | 6.732320  | 12.312079 | 11.794408 |
| 67 | 1 | 0 | 4.685463  | 8.694866  | 12.909791 |
| 68 | 1 | 0 | 6.745780  | 9.850383  | 12.140334 |
| 69 | 6 | 0 | 0.741565  | 13.547599 | 11.067408 |
| 70 | 6 | 0 | 1.555435  | 13.947637 | 10.002791 |
| 71 | 6 | 0 | -0.388781 | 14.303378 | 11.386306 |
| 72 | 6 | 0 | 1.243420  | 15.088107 | 9.268014  |
| 73 | 1 | 0 | 2.435129  | 13.355872 | 9.747049  |
| 74 | 6 | 0 | -0.699254 | 15.445228 | 10.650516 |
| 75 | 1 | 0 | -1.036257 | 13.988842 | 12.204661 |
| 76 | 6 | 0 | 0.115742  | 15.841834 | 9.592224  |
| 77 | 1 | 0 | 1.878867  | 15.385062 | 8.435376  |
| 78 | 1 | 0 | -1.585373 | 16.024420 | 10.904305 |
| 79 | 1 | 0 | -0.131743 | 16.731054 | 9.015269  |
| 80 | 6 | 0 | 0.111995  | 9.139611  | 12.034569 |
| 81 | 6 | 0 | 0.098997  | 8.307759  | 13.156187 |
| 82 | 6 | 0 | 0.987217  | 8.912877  | 10.971250 |
| 83 | 6 | 0 | 0.982397  | 7.239138  | 13.208643 |
| 84 | 1 | 0 | -0.606088 | 8.487144  | 13.966070 |
| 85 | 6 | 0 | 1.867936  | 7.840392  | 11.048789 |
| 86 | 1 | 0 | 0.971379  | 9.558731  | 10.095693 |
| 87 | 6 | 0 | 1.885388  | 6.993087  | 12.163400 |
| 88 | 1 | 0 | 0.974163  | 6.581266  | 14.077270 |



|     |    |   |          |           |           |
|-----|----|---|----------|-----------|-----------|
| 89  | 1  | 0 | 2.560424 | 7.657187  | 10.228492 |
| 90  | 6  | 0 | 2.835322 | 5.842000  | 12.238549 |
| 91  | 1  | 0 | 3.313341 | 5.778431  | 13.223898 |
| 92  | 1  | 0 | 2.311806 | 4.889107  | 12.084255 |
| 93  | 1  | 0 | 3.620059 | 5.913917  | 11.478772 |
| 94  | 17 | 0 | 1.682308 | 15.389996 | 19.874217 |
| 95  | 28 | 0 | 1.949237 | 12.884217 | 16.042836 |
| 96  | 6  | 0 | 5.307979 | 15.297510 | 15.075825 |
| 97  | 6  | 0 | 6.085327 | 14.201060 | 15.439456 |
| 98  | 6  | 0 | 7.467130 | 14.179375 | 15.336340 |
| 99  | 6  | 0 | 8.092906 | 15.322222 | 14.840083 |
| 100 | 6  | 0 | 7.335921 | 16.433986 | 14.467882 |
| 101 | 6  | 0 | 5.944788 | 16.434585 | 14.579663 |
| 102 | 6  | 0 | 3.854150 | 15.061403 | 15.373121 |
| 103 | 1  | 0 | 8.039659 | 13.300660 | 15.626798 |
| 104 | 1  | 0 | 9.175703 | 15.343489 | 14.737746 |
| 105 | 1  | 0 | 7.835891 | 17.317378 | 14.075220 |
| 106 | 1  | 0 | 5.373899 | 17.304920 | 14.271438 |
| 107 | 16 | 0 | 5.043118 | 12.944998 | 16.128482 |
| 108 | 8  | 0 | 5.213327 | 12.965855 | 17.587478 |
| 109 | 8  | 0 | 5.168174 | 11.647640 | 15.471227 |
| 110 | 6  | 0 | 2.791769 | 15.582612 | 14.423871 |
| 111 | 8  | 0 | 1.600615 | 15.462143 | 14.634434 |
| 112 | 8  | 0 | 3.318792 | 16.175578 | 13.352374 |
| 113 | 6  | 0 | 2.360920 | 16.691354 | 12.405381 |
| 114 | 1  | 0 | 1.804415 | 17.521466 | 12.851234 |
| 115 | 1  | 0 | 2.950390 | 17.036191 | 11.556060 |
| 116 | 1  | 0 | 1.668118 | 15.900224 | 12.108021 |
| 117 | 7  | 0 | 3.642035 | 13.701585 | 15.616110 |
| 118 | 6  | 0 | 3.388969 | 17.512681 | 16.392595 |
| 119 | 6  | 0 | 4.400314 | 15.845765 | 17.872442 |
| 120 | 6  | 0 | 4.374081 | 18.394535 | 16.702512 |
| 121 | 1  | 0 | 2.570929 | 17.835201 | 15.748280 |

|     |   |   |          |           |           |
|-----|---|---|----------|-----------|-----------|
| 122 | 6 | 0 | 5.414086 | 16.705200 | 18.166785 |
| 123 | 1 | 0 | 4.344055 | 14.879028 | 18.363572 |
| 124 | 6 | 0 | 5.461654 | 17.989359 | 17.543703 |
| 125 | 1 | 0 | 4.363956 | 19.412267 | 16.315619 |
| 126 | 1 | 0 | 6.172300 | 16.436827 | 18.898004 |
| 127 | 7 | 0 | 6.486851 | 18.817457 | 17.739438 |
| 128 | 1 | 0 | 6.447994 | 19.727872 | 17.294977 |
| 129 | 6 | 0 | 7.666191 | 18.504386 | 18.517239 |
| 130 | 1 | 0 | 8.135414 | 17.584399 | 18.149647 |
| 131 | 1 | 0 | 8.374593 | 19.327389 | 18.417898 |
| 132 | 1 | 0 | 7.421093 | 18.375671 | 19.578002 |
| 133 | 6 | 0 | 3.424060 | 16.132994 | 16.844215 |
| 134 | 1 | 0 | 2.449693 | 15.664014 | 17.006002 |

Imaginary frequency:  $-196.9 \text{ cm}^{-1}$ .

Energies:

|                                              |              |
|----------------------------------------------|--------------|
| Sum of electronic and zero-point Energies=   | -4659.266338 |
| Sum of electronic and thermal Energies=      | -4659.200123 |
| Sum of electronic and thermal Enthalpies=    | -4659.199179 |
| Sum of electronic and thermal Free Energies= | -4659.362677 |

Optimized Structures for Intermediates **10a** and **10b**

Optimized Structures for Intermediate **10a**

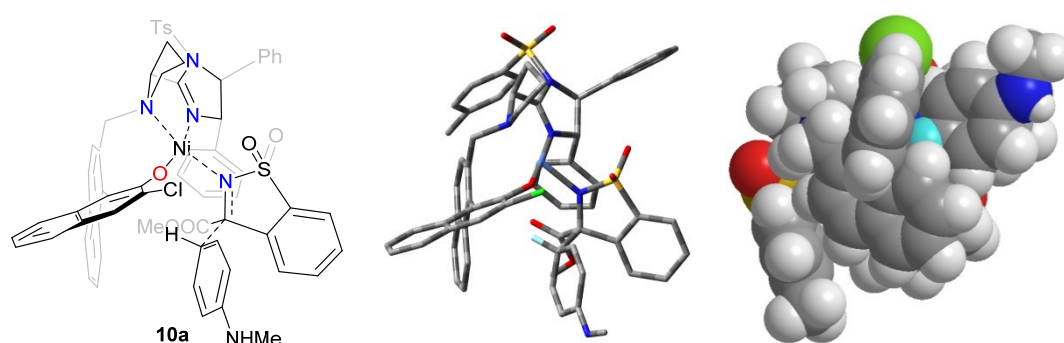

| Center Number | Atomic Number | Atomic Type | Coordinates (Angstroms) |   |   |
|---------------|---------------|-------------|-------------------------|---|---|
|               |               |             | X                       | Y | Z |

|    |   |   |           |           |           |
|----|---|---|-----------|-----------|-----------|
| 1  | 6 | 0 | 2.253626  | 13.784315 | 20.130999 |
| 2  | 1 | 0 | 2.107430  | 14.096459 | 22.235693 |
| 3  | 6 | 0 | 2.254761  | 13.375283 | 21.434002 |
| 4  | 6 | 0 | 2.455244  | 12.888829 | 19.020144 |
| 5  | 6 | 0 | 2.420772  | 12.006950 | 21.749098 |
| 6  | 8 | 0 | 2.497444  | 13.432861 | 17.832036 |
| 7  | 6 | 0 | 2.632018  | 11.523783 | 19.325501 |
| 8  | 6 | 0 | 2.393225  | 11.563318 | 23.091294 |
| 9  | 6 | 0 | 2.585977  | 11.065869 | 20.681571 |
| 10 | 6 | 0 | 2.779228  | 10.541249 | 18.221320 |
| 11 | 1 | 0 | 2.269638  | 12.307389 | 23.878242 |
| 12 | 6 | 0 | 2.506537  | 10.226537 | 23.397908 |
| 13 | 6 | 0 | 2.676316  | 9.692606  | 21.038045 |
| 14 | 6 | 0 | 3.981105  | 9.774473  | 18.081388 |
| 15 | 6 | 0 | 1.727838  | 10.316910 | 17.333077 |
| 16 | 1 | 0 | 2.481415  | 9.893996  | 24.433810 |
| 17 | 6 | 0 | 2.639636  | 9.287726  | 22.354805 |
| 18 | 1 | 0 | 2.770013  | 8.942900  | 20.255130 |
| 19 | 6 | 0 | 5.121227  | 10.002557 | 18.892822 |
| 20 | 6 | 0 | 4.064852  | 8.759253  | 17.074845 |
| 21 | 6 | 0 | 1.833689  | 9.317514  | 16.336444 |
| 22 | 6 | 0 | 0.464106  | 11.116272 | 17.432538 |
| 23 | 1 | 0 | 2.708058  | 8.226576  | 22.590164 |
| 24 | 1 | 0 | 5.080482  | 10.782581 | 19.651980 |
| 25 | 6 | 0 | 6.274104  | 9.268222  | 18.726522 |
| 26 | 6 | 0 | 5.257896  | 8.010178  | 16.938177 |
| 27 | 6 | 0 | 2.962118  | 8.548105  | 16.215367 |
| 28 | 1 | 0 | 0.986131  | 9.155705  | 15.668295 |
| 29 | 7 | 0 | 0.418560  | 12.256005 | 16.455793 |
| 30 | 1 | 0 | -0.422518 | 10.489865 | 17.263399 |
| 31 | 1 | 0 | 0.367544  | 11.554479 | 18.428994 |
| 32 | 1 | 0 | 7.139298  | 9.471497  | 19.356529 |
| 33 | 6 | 0 | 6.344395  | 8.256158  | 17.745395 |

|    |    |   |           |           |           |
|----|----|---|-----------|-----------|-----------|
| 34 | 1  | 0 | 5.302805  | 7.241505  | 16.165864 |
| 35 | 1  | 0 | 3.029623  | 7.771329  | 15.452284 |
| 36 | 6  | 0 | -0.348734 | 13.416490 | 17.033069 |
| 37 | 6  | 0 | -0.307523 | 11.899846 | 15.171149 |
| 38 | 1  | 0 | 7.260308  | 7.679612  | 17.625133 |
| 39 | 1  | 0 | 0.327214  | 14.013620 | 17.649132 |
| 40 | 1  | 0 | -1.151739 | 13.011318 | 17.666005 |
| 41 | 6  | 0 | -0.930422 | 14.116813 | 15.834098 |
| 42 | 6  | 0 | -1.434566 | 12.940731 | 15.015521 |
| 43 | 1  | 0 | -0.706136 | 10.881761 | 15.250996 |
| 44 | 6  | 0 | 0.666609  | 11.991856 | 14.053167 |
| 45 | 1  | 0 | -0.148383 | 14.673532 | 15.296759 |
| 46 | 1  | 0 | -1.721814 | 14.820288 | 16.108030 |
| 47 | 1  | 0 | -1.635148 | 13.169864 | 13.965649 |
| 48 | 1  | 0 | -2.355598 | 12.536790 | 15.450811 |
| 49 | 7  | 0 | 1.893418  | 12.356464 | 14.271683 |
| 50 | 7  | 0 | 0.326396  | 11.886321 | 12.724053 |
| 51 | 6  | 0 | 2.608749  | 12.498174 | 12.983835 |
| 52 | 16 | 0 | -0.813860 | 10.758545 | 12.079901 |
| 53 | 6  | 0 | 1.514167  | 12.235238 | 11.898251 |
| 54 | 1  | 0 | 2.939158  | 13.538735 | 12.924315 |
| 55 | 8  | 0 | -1.888636 | 10.684429 | 13.059155 |
| 56 | 8  | 0 | -1.028210 | 11.209245 | 10.715289 |
| 57 | 1  | 0 | 1.797686  | 11.355773 | 11.304129 |
| 58 | 6  | 0 | 3.785805  | 11.581630 | 12.804179 |
| 59 | 6  | 0 | 4.997325  | 12.106461 | 12.350975 |
| 60 | 6  | 0 | 3.652257  | 10.196798 | 12.948199 |
| 61 | 6  | 0 | 6.057523  | 11.260809 | 12.030344 |
| 62 | 1  | 0 | 5.100580  | 13.186484 | 12.235842 |
| 63 | 6  | 0 | 4.713862  | 9.351859  | 12.641473 |
| 64 | 1  | 0 | 2.706629  | 9.778744  | 13.301211 |
| 65 | 6  | 0 | 5.915504  | 9.882001  | 12.169858 |
| 66 | 1  | 0 | 6.996832  | 11.680729 | 11.673678 |

|    |    |   |           |           |           |
|----|----|---|-----------|-----------|-----------|
| 67 | 1  | 0 | 4.607339  | 8.274311  | 12.768306 |
| 68 | 1  | 0 | 6.744240  | 9.220452  | 11.921727 |
| 69 | 6  | 0 | 1.251426  | 13.396957 | 10.983787 |
| 70 | 6  | 0 | 1.571575  | 13.305733 | 9.628823  |
| 71 | 6  | 0 | 0.728160  | 14.591729 | 11.486873 |
| 72 | 6  | 0 | 1.372806  | 14.395322 | 8.783488  |
| 73 | 1  | 0 | 1.974482  | 12.371453 | 9.236080  |
| 74 | 6  | 0 | 0.525348  | 15.678430 | 10.643495 |
| 75 | 1  | 0 | 0.489097  | 14.669847 | 12.547613 |
| 76 | 6  | 0 | 0.848529  | 15.582354 | 9.289678  |
| 77 | 1  | 0 | 1.623888  | 14.314648 | 7.727332  |
| 78 | 1  | 0 | 0.117538  | 16.604992 | 11.043526 |
| 79 | 1  | 0 | 0.689587  | 16.433582 | 8.629956  |
| 80 | 6  | 0 | 0.067585  | 9.233912  | 12.056090 |
| 81 | 6  | 0 | 0.063553  | 8.432466  | 13.199571 |
| 82 | 6  | 0 | 0.820564  | 8.892666  | 10.932093 |
| 83 | 6  | 0 | 0.829893  | 7.275750  | 13.210081 |
| 84 | 1  | 0 | -0.540990 | 8.708931  | 14.061704 |
| 85 | 6  | 0 | 1.584825  | 7.732085  | 10.966258 |
| 86 | 1  | 0 | 0.800149  | 9.523434  | 10.045639 |
| 87 | 6  | 0 | 1.605370  | 6.909777  | 12.099280 |
| 88 | 1  | 0 | 0.826997  | 6.639742  | 14.094840 |
| 89 | 1  | 0 | 2.180272  | 7.458768  | 10.096562 |
| 90 | 6  | 0 | 2.427475  | 5.662006  | 12.128378 |
| 91 | 1  | 0 | 2.922772  | 5.529855  | 13.097853 |
| 92 | 1  | 0 | 1.799677  | 4.774665  | 11.972184 |
| 93 | 1  | 0 | 3.192934  | 5.663189  | 11.345352 |
| 94 | 17 | 0 | 1.980201  | 15.477485 | 19.777044 |
| 95 | 28 | 0 | 2.301711  | 12.859939 | 16.056277 |
| 96 | 6  | 0 | 6.163005  | 14.708230 | 15.480675 |
| 97 | 6  | 0 | 5.386356  | 15.759081 | 15.007754 |
| 98 | 6  | 0 | 5.918216  | 16.956324 | 14.546925 |
| 99 | 6  | 0 | 7.302637  | 17.095082 | 14.567307 |

|     |    |   |          |           |           |
|-----|----|---|----------|-----------|-----------|
| 100 | 6  | 0 | 8.104735 | 16.058257 | 15.049030 |
| 101 | 6  | 0 | 7.549058 | 14.866316 | 15.512046 |
| 102 | 6  | 0 | 5.314506 | 13.557936 | 15.997011 |
| 103 | 1  | 0 | 5.272991 | 17.753521 | 14.182319 |
| 104 | 1  | 0 | 7.759712 | 18.014367 | 14.207318 |
| 105 | 1  | 0 | 9.186131 | 16.178956 | 15.062041 |
| 106 | 1  | 0 | 8.194510 | 14.072440 | 15.876393 |
| 107 | 16 | 0 | 3.673104 | 15.356483 | 15.168345 |
| 108 | 8  | 0 | 2.958521 | 15.446628 | 13.883745 |
| 109 | 8  | 0 | 3.077521 | 16.175106 | 16.241311 |
| 110 | 6  | 0 | 5.713913 | 12.141214 | 15.581659 |
| 111 | 8  | 0 | 4.966206 | 11.198985 | 15.710407 |
| 112 | 8  | 0 | 6.990684 | 12.066288 | 15.186295 |
| 113 | 6  | 0 | 7.534407 | 10.742171 | 15.048680 |
| 114 | 1  | 0 | 6.781729 | 10.049539 | 14.669669 |
| 115 | 1  | 0 | 8.370144 | 10.829662 | 14.352845 |
| 116 | 1  | 0 | 7.896328 | 10.403873 | 16.026875 |
| 117 | 7  | 0 | 3.955953 | 13.785475 | 15.564885 |
| 118 | 6  | 0 | 6.788369 | 12.994127 | 18.083671 |
| 119 | 6  | 0 | 5.080392 | 14.774464 | 18.231339 |
| 120 | 6  | 0 | 7.588273 | 13.693413 | 18.917957 |
| 121 | 1  | 0 | 7.118273 | 12.013190 | 17.743515 |
| 122 | 6  | 0 | 5.881262 | 15.480225 | 19.062883 |
| 123 | 1  | 0 | 4.104870 | 15.168028 | 17.953753 |
| 124 | 6  | 0 | 7.173030 | 14.975193 | 19.418294 |
| 125 | 1  | 0 | 8.552521 | 13.301019 | 19.236682 |
| 126 | 1  | 0 | 5.550674 | 16.433054 | 19.468845 |
| 127 | 7  | 0 | 7.992023 | 15.658764 | 20.201617 |
| 128 | 1  | 0 | 8.893653 | 15.240367 | 20.408714 |
| 129 | 6  | 0 | 7.718830 | 16.958434 | 20.783194 |
| 130 | 1  | 0 | 6.846928 | 16.913705 | 21.444342 |
| 131 | 1  | 0 | 8.589214 | 17.260905 | 21.365195 |
| 132 | 1  | 0 | 7.535981 | 17.702614 | 20.001048 |

|     |   |   |          |           |           |
|-----|---|---|----------|-----------|-----------|
| 133 | 6 | 0 | 5.471188 | 13.486544 | 17.636530 |
| 134 | 1 | 0 | 4.707609 | 12.721109 | 17.864111 |

Number of imaginary frequency: 0

Energies:

|                                              |              |
|----------------------------------------------|--------------|
| Sum of electronic and zero-point Energies=   | -4659.263071 |
| Sum of electronic and thermal Energies=      | -4659.196692 |
| Sum of electronic and thermal Enthalpies=    | -4659.195748 |
| Sum of electronic and thermal Free Energies= | -4659.360464 |

### Optimized Structures for Intermediate **10b**

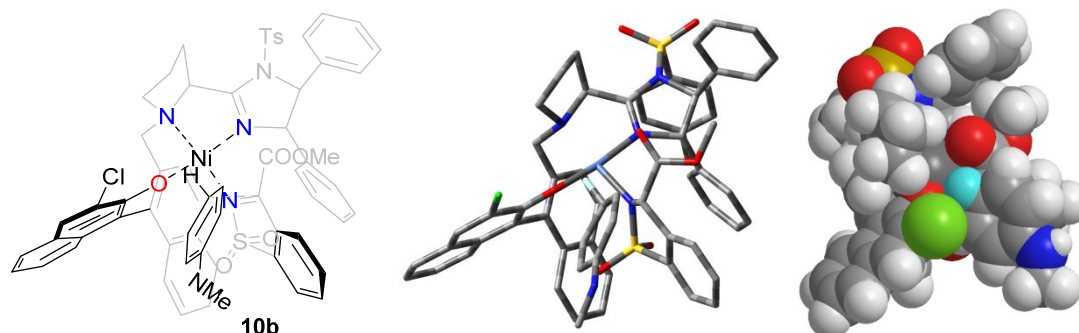

| Center Number | Atomic Number | Atomic Type | Coordinates (Angstroms) |           |           |
|---------------|---------------|-------------|-------------------------|-----------|-----------|
|               |               |             | X                       | Y         | Z         |
| 1             | 6             | 0           | 2.158076                | 13.737888 | 20.070007 |
| 2             | 1             | 0           | 2.100909                | 13.971329 | 22.190233 |
| 3             | 6             | 0           | 2.250843                | 13.287586 | 21.356596 |
| 4             | 6             | 0           | 2.349493                | 12.899390 | 18.915067 |
| 5             | 6             | 0           | 2.510780                | 11.921732 | 21.609138 |
| 6             | 8             | 0           | 2.254262                | 13.484628 | 17.748611 |
| 7             | 6             | 0           | 2.625296                | 11.538298 | 19.158166 |
| 8             | 6             | 0           | 2.577525                | 11.425728 | 22.932743 |
| 9             | 6             | 0           | 2.672289                | 11.032836 | 20.496792 |
| 10            | 6             | 0           | 2.782234                | 10.597049 | 18.019386 |
| 11            | 1             | 0           | 2.457455                | 12.132164 | 23.754374 |
| 12            | 6             | 0           | 2.777203                | 10.086970 | 23.178858 |
| 13            | 6             | 0           | 2.849058                | 9.653209  | 20.794068 |
| 14            | 6             | 0           | 4.019476                | 9.904694  | 17.805753 |

|    |   |   |           |           |           |
|----|---|---|-----------|-----------|-----------|
| 15 | 6 | 0 | 1.700495  | 10.324108 | 17.181296 |
| 16 | 1 | 0 | 2.825468  | 9.714351  | 24.200318 |
| 17 | 6 | 0 | 2.901711  | 9.197003  | 22.092689 |
| 18 | 1 | 0 | 2.939656  | 8.939409  | 19.978482 |
| 19 | 6 | 0 | 5.169850  | 10.145207 | 18.598965 |
| 20 | 6 | 0 | 4.118872  | 8.934356  | 16.757950 |
| 21 | 6 | 0 | 1.819123  | 9.362516  | 16.150353 |
| 22 | 6 | 0 | 0.392883  | 11.030560 | 17.373391 |
| 23 | 1 | 0 | 3.037217  | 8.132748  | 22.280217 |
| 24 | 1 | 0 | 5.120358  | 10.899356 | 19.380053 |
| 25 | 6 | 0 | 6.345592  | 9.468663  | 18.372939 |
| 26 | 6 | 0 | 5.342405  | 8.251832  | 16.549825 |
| 27 | 6 | 0 | 2.990692  | 8.681321  | 15.943955 |
| 28 | 1 | 0 | 0.951414  | 9.152172  | 15.522942 |
| 29 | 7 | 0 | 0.208101  | 12.167517 | 16.410506 |
| 30 | 1 | 0 | -0.459255 | 10.345372 | 17.257735 |
| 31 | 1 | 0 | 0.334218  | 11.458950 | 18.377219 |
| 32 | 1 | 0 | 7.217431  | 9.680654  | 18.989767 |
| 33 | 6 | 0 | 6.437056  | 8.511786  | 17.339721 |
| 34 | 1 | 0 | 5.396857  | 7.516715  | 15.746215 |
| 35 | 1 | 0 | 3.068185  | 7.936628  | 15.150556 |
| 36 | 6 | 0 | -0.641429 | 13.249694 | 17.018493 |
| 37 | 6 | 0 | -0.514205 | 11.746324 | 15.145932 |
| 38 | 1 | 0 | 7.374577  | 7.984548  | 17.170115 |
| 39 | 1 | 0 | 0.003982  | 13.914271 | 17.599213 |
| 40 | 1 | 0 | -1.367184 | 12.775082 | 17.694852 |
| 41 | 6 | 0 | -1.350647 | 13.876792 | 15.844394 |
| 42 | 6 | 0 | -1.757414 | 12.649148 | 15.047441 |
| 43 | 1 | 0 | -0.793726 | 10.688085 | 15.219907 |
| 44 | 6 | 0 | 0.408612  | 11.961162 | 14.000257 |
| 45 | 1 | 0 | -0.660210 | 14.510228 | 15.269721 |
| 46 | 1 | 0 | -2.202570 | 14.489529 | 16.153022 |
| 47 | 1 | 0 | -2.030542 | 12.853197 | 14.009182 |



|    |    |   |           |           |           |
|----|----|---|-----------|-----------|-----------|
| 48 | 1  | 0 | -2.604181 | 12.142208 | 15.523932 |
| 49 | 7  | 0 | 1.595108  | 12.450342 | 14.193286 |
| 50 | 7  | 0 | 0.050110  | 11.831763 | 12.676926 |
| 51 | 6  | 0 | 2.262991  | 12.668173 | 12.895572 |
| 52 | 16 | 0 | -0.960613 | 10.588307 | 12.032456 |
| 53 | 6  | 0 | 1.152221  | 12.348493 | 11.836948 |
| 54 | 1  | 0 | 2.520912  | 13.729710 | 12.826788 |
| 55 | 8  | 0 | -2.033126 | 10.416386 | 13.001650 |
| 56 | 8  | 0 | -1.201970 | 11.015158 | 10.664426 |
| 57 | 1  | 0 | 1.510053  | 11.545746 | 11.177550 |
| 58 | 6  | 0 | 3.504181  | 11.848253 | 12.688437 |
| 59 | 6  | 0 | 4.649724  | 12.452192 | 12.168887 |
| 60 | 6  | 0 | 3.494021  | 10.469667 | 12.911628 |
| 61 | 6  | 0 | 5.778172  | 11.688989 | 11.880880 |
| 62 | 1  | 0 | 4.650946  | 13.528862 | 11.984888 |
| 63 | 6  | 0 | 4.624045  | 9.707972  | 12.632415 |
| 64 | 1  | 0 | 2.596559  | 9.994880  | 13.316516 |
| 65 | 6  | 0 | 5.767526  | 10.316054 | 12.115600 |
| 66 | 1  | 0 | 6.667960  | 12.167960 | 11.474341 |
| 67 | 1  | 0 | 4.616238  | 8.633853  | 12.818571 |
| 68 | 1  | 0 | 6.649770  | 9.718051  | 11.893332 |
| 69 | 6  | 0 | 0.737628  | 13.537744 | 11.013639 |
| 70 | 6  | 0 | 1.525798  | 13.902057 | 9.917290  |
| 71 | 6  | 0 | -0.363449 | 14.325349 | 11.357315 |
| 72 | 6  | 0 | 1.219990  | 15.041985 | 9.178817  |
| 73 | 1  | 0 | 2.382790  | 13.285488 | 9.643441  |
| 74 | 6  | 0 | -0.668783 | 15.465191 | 10.616667 |
| 75 | 1  | 0 | -0.993763 | 14.036918 | 12.198281 |
| 76 | 6  | 0 | 0.123256  | 15.828822 | 9.529291  |
| 77 | 1  | 0 | 1.836445  | 15.313344 | 8.323545  |
| 78 | 1  | 0 | -1.532751 | 16.068762 | 10.889190 |
| 79 | 1  | 0 | -0.119355 | 16.717522 | 8.949459  |
| 80 | 6  | 0 | 0.063290  | 9.153829  | 12.031429 |

|     |    |   |           |           |           |
|-----|----|---|-----------|-----------|-----------|
| 81  | 6  | 0 | 0.063652  | 8.329374  | 13.158544 |
| 82  | 6  | 0 | 0.903780  | 8.901940  | 10.946146 |
| 83  | 6  | 0 | 0.927035  | 7.243916  | 13.195059 |
| 84  | 1  | 0 | -0.614336 | 8.530072  | 13.986195 |
| 85  | 6  | 0 | 1.763894  | 7.811472  | 11.006962 |
| 86  | 1  | 0 | 0.876665  | 9.542070  | 10.066732 |
| 87  | 6  | 0 | 1.794643  | 6.971431  | 12.126479 |
| 88  | 1  | 0 | 0.929682  | 6.592637  | 14.068620 |
| 89  | 1  | 0 | 2.428057  | 7.607397  | 10.168420 |
| 90  | 6  | 0 | 2.725750  | 5.803944  | 12.186504 |
| 91  | 1  | 0 | 3.251591  | 5.758990  | 13.148539 |
| 92  | 1  | 0 | 2.179004  | 4.857097  | 12.085594 |
| 93  | 1  | 0 | 3.473618  | 5.840429  | 11.387937 |
| 94  | 17 | 0 | 1.759931  | 15.424943 | 19.794677 |
| 95  | 28 | 0 | 2.030784  | 12.913966 | 15.982299 |
| 96  | 6  | 0 | 5.386582  | 15.346121 | 14.997910 |
| 97  | 6  | 0 | 6.138893  | 14.200120 | 15.225309 |
| 98  | 6  | 0 | 7.503516  | 14.127449 | 14.984045 |
| 99  | 6  | 0 | 8.131344  | 15.267452 | 14.488341 |
| 100 | 6  | 0 | 7.397707  | 16.434241 | 14.262349 |
| 101 | 6  | 0 | 6.027184  | 16.485713 | 14.515247 |
| 102 | 6  | 0 | 3.924499  | 15.153884 | 15.360858 |
| 103 | 1  | 0 | 8.056991  | 13.208372 | 15.168422 |
| 104 | 1  | 0 | 9.197794  | 15.247600 | 14.273569 |
| 105 | 1  | 0 | 7.899739  | 17.316664 | 13.870108 |
| 106 | 1  | 0 | 5.469013  | 17.395713 | 14.308597 |
| 107 | 16 | 0 | 5.105071  | 12.952814 | 15.942406 |
| 108 | 8  | 0 | 5.379095  | 12.945148 | 17.391219 |
| 109 | 8  | 0 | 5.190556  | 11.654247 | 15.276214 |
| 110 | 6  | 0 | 2.902308  | 15.631369 | 14.323778 |
| 111 | 8  | 0 | 1.703491  | 15.581316 | 14.522137 |
| 112 | 8  | 0 | 3.465427  | 16.102035 | 13.211592 |
| 113 | 6  | 0 | 2.545015  | 16.576931 | 12.208505 |

|     |   |   |          |           |           |
|-----|---|---|----------|-----------|-----------|
| 114 | 1 | 0 | 2.002953 | 17.450852 | 12.583198 |
| 115 | 1 | 0 | 3.163860 | 16.845951 | 11.352325 |
| 116 | 1 | 0 | 1.835314 | 15.788976 | 11.945852 |
| 117 | 7 | 0 | 3.713393 | 13.731995 | 15.507405 |
| 118 | 6 | 0 | 3.510077 | 17.489094 | 16.359910 |
| 119 | 6 | 0 | 4.408002 | 15.726544 | 17.832156 |
| 120 | 6 | 0 | 4.326407 | 18.393030 | 16.942503 |
| 121 | 1 | 0 | 2.808390 | 17.827856 | 15.596915 |
| 122 | 6 | 0 | 5.243928 | 16.624074 | 18.408217 |
| 123 | 1 | 0 | 4.379693 | 14.703518 | 18.192605 |
| 124 | 6 | 0 | 5.257343 | 17.981740 | 17.958177 |
| 125 | 1 | 0 | 4.297710 | 19.444805 | 16.663188 |
| 126 | 1 | 0 | 5.881539 | 16.327577 | 19.237093 |
| 127 | 7 | 0 | 6.088981 | 18.877229 | 18.469334 |
| 128 | 1 | 0 | 6.030417 | 19.824907 | 18.109845 |
| 129 | 6 | 0 | 7.080154 | 18.619808 | 19.494925 |
| 130 | 1 | 0 | 7.799999 | 17.866710 | 19.157654 |
| 131 | 1 | 0 | 7.608982 | 19.550430 | 19.700715 |
| 132 | 1 | 0 | 6.603899 | 18.269050 | 20.416604 |
| 133 | 6 | 0 | 3.540364 | 16.052003 | 16.692866 |
| 134 | 1 | 0 | 2.523152 | 15.677751 | 16.891003 |

Number of imaginary frequency: 0

Energies:

|                                              |              |
|----------------------------------------------|--------------|
| Sum of electronic and zero-point Energies=   | -4659.266427 |
| Sum of electronic and thermal Energies=      | -4659.199879 |
| Sum of electronic and thermal Enthalpies=    | -4659.198935 |
| Sum of electronic and thermal Free Energies= | -4659.363650 |

Proton departure from Aminoaryl Ring to Naphtholate

TS-1

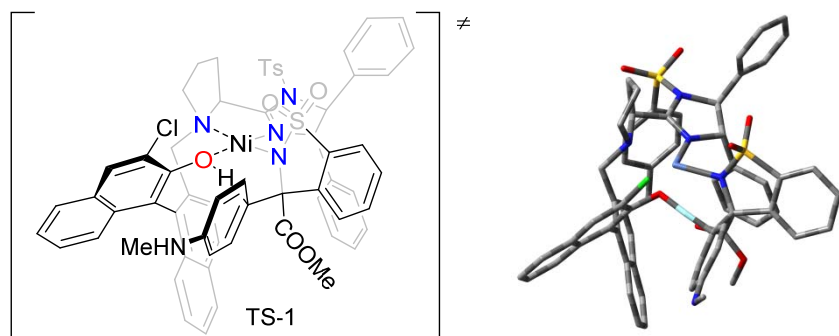

| Center Number | Atomic Number | Atomic Type | Coordinates (Angstroms) |           |           |
|---------------|---------------|-------------|-------------------------|-----------|-----------|
|               |               |             | X                       | Y         | Z         |
| 1             | 6             | 0           | 2.539818                | 13.791442 | 20.000230 |
| 2             | 1             | 0           | 2.228983                | 14.172558 | 22.079601 |
| 3             | 6             | 0           | 2.402895                | 13.422736 | 21.310995 |
| 4             | 6             | 0           | 2.785730                | 12.838042 | 18.964781 |
| 5             | 6             | 0           | 2.466227                | 12.057141 | 21.670302 |
| 6             | 8             | 0           | 3.013062                | 13.320433 | 17.726294 |
| 7             | 6             | 0           | 2.859172                | 11.483230 | 19.293976 |
| 8             | 6             | 0           | 2.309832                | 11.652068 | 23.017611 |
| 9             | 6             | 0           | 2.664773                | 11.071595 | 20.651253 |
| 10            | 6             | 0           | 3.068598                | 10.474523 | 18.222355 |
| 11            | 1             | 0           | 2.165276                | 12.420363 | 23.776158 |
| 12            | 6             | 0           | 2.334608                | 10.320136 | 23.359874 |
| 13            | 6             | 0           | 2.660138                | 9.706789  | 21.039397 |
| 14            | 6             | 0           | 4.262604                | 9.687511  | 18.182261 |
| 15            | 6             | 0           | 2.073792                | 10.260691 | 17.273282 |
| 16            | 1             | 0           | 2.215015                | 10.018803 | 24.398823 |
| 17            | 6             | 0           | 2.502836                | 9.342132  | 22.357720 |
| 18            | 1             | 0           | 2.782788                | 8.937146  | 20.280307 |
| 19            | 6             | 0           | 5.310901                | 9.847407  | 19.123848 |
| 20            | 6             | 0           | 4.415009                | 8.690049  | 17.166425 |
| 21            | 6             | 0           | 2.254011                | 9.288715  | 16.260941 |

|    |    |   |           |           |           |
|----|----|---|-----------|-----------|-----------|
| 22 | 6  | 0 | 0.766615  | 10.988257 | 17.369913 |
| 23 | 1  | 0 | 2.504708  | 8.287863  | 22.627962 |
| 24 | 1  | 0 | 5.218351  | 10.609055 | 19.895922 |
| 25 | 6  | 0 | 6.439662  | 9.059601  | 19.076464 |
| 26 | 6  | 0 | 5.585276  | 7.892704  | 17.146271 |
| 27 | 6  | 0 | 3.390249  | 8.523356  | 16.204902 |
| 28 | 1  | 0 | 1.454533  | 9.142046  | 15.532604 |
| 29 | 7  | 0 | 0.645283  | 12.189950 | 16.470062 |
| 30 | 1  | 0 | -0.069306 | 10.313780 | 17.141155 |
| 31 | 1  | 0 | 0.614846  | 11.345661 | 18.391396 |
| 32 | 1  | 0 | 7.228501  | 9.201455  | 19.813753 |
| 33 | 6  | 0 | 6.578524  | 8.067208  | 18.083079 |
| 34 | 1  | 0 | 5.683831  | 7.135632  | 16.368076 |
| 35 | 1  | 0 | 3.515608  | 7.766355  | 15.429747 |
| 36 | 6  | 0 | -0.070123 | 13.309754 | 17.181393 |
| 37 | 6  | 0 | -0.190275 | 11.915510 | 15.228985 |
| 38 | 1  | 0 | 7.472024  | 7.446069  | 18.058717 |
| 39 | 1  | 0 | 0.647916  | 13.864296 | 17.792302 |
| 40 | 1  | 0 | -0.830954 | 12.868931 | 17.841577 |
| 41 | 6  | 0 | -0.724141 | 14.097677 | 16.076305 |
| 42 | 6  | 0 | -1.299714 | 12.984399 | 15.214637 |
| 43 | 1  | 0 | -0.606667 | 10.903540 | 15.284327 |
| 44 | 6  | 0 | 0.694109  | 12.046888 | 14.043460 |
| 45 | 1  | 0 | 0.025612  | 14.685641 | 15.526364 |
| 46 | 1  | 0 | -1.486460 | 14.785832 | 16.452152 |
| 47 | 1  | 0 | -1.558281 | 13.290386 | 14.196965 |
| 48 | 1  | 0 | -2.201423 | 12.568958 | 15.678586 |
| 49 | 7  | 0 | 1.910424  | 12.471423 | 14.185759 |
| 50 | 7  | 0 | 0.291179  | 11.911825 | 12.738081 |
| 51 | 6  | 0 | 2.559084  | 12.622188 | 12.863605 |
| 52 | 16 | 0 | -0.866216 | 10.770072 | 12.169668 |
| 53 | 6  | 0 | 1.424481  | 12.290300 | 11.843730 |
| 54 | 1  | 0 | 2.837835  | 13.674891 | 12.771915 |

|    |   |   |           |           |           |
|----|---|---|-----------|-----------|-----------|
| 55 | 8 | 0 | -1.888451 | 10.706412 | 13.204956 |
| 56 | 8 | 0 | -1.150728 | 11.199710 | 10.811510 |
| 57 | 1 | 0 | 1.707690  | 11.409298 | 11.250371 |
| 58 | 6 | 0 | 3.776803  | 11.758713 | 12.692044 |
| 59 | 6 | 0 | 5.014576  | 12.345841 | 12.427140 |
| 60 | 6 | 0 | 3.675649  | 10.365218 | 12.733544 |
| 61 | 6 | 0 | 6.137322  | 11.552583 | 12.198445 |
| 62 | 1 | 0 | 5.093211  | 13.433645 | 12.395281 |
| 63 | 6 | 0 | 4.792343  | 9.569948  | 12.496238 |
| 64 | 1 | 0 | 2.706772  | 9.901828  | 12.938986 |
| 65 | 6 | 0 | 6.025946  | 10.163577 | 12.225345 |
| 66 | 1 | 0 | 7.100584  | 12.022964 | 12.003867 |
| 67 | 1 | 0 | 4.701913  | 8.483929  | 12.521506 |
| 68 | 1 | 0 | 6.901025  | 9.542942  | 12.038336 |
| 69 | 6 | 0 | 1.055708  | 13.424105 | 10.930443 |
| 70 | 6 | 0 | 1.222670  | 13.299126 | 9.550991  |
| 71 | 6 | 0 | 0.564962  | 14.622294 | 11.458184 |
| 72 | 6 | 0 | 0.906736  | 14.360299 | 8.705287  |
| 73 | 1 | 0 | 1.599518  | 12.362026 | 9.139913  |
| 74 | 6 | 0 | 0.245070  | 15.680266 | 10.614553 |
| 75 | 1 | 0 | 0.447684  | 14.727432 | 12.536990 |
| 76 | 6 | 0 | 0.415789  | 15.550974 | 9.235692  |
| 77 | 1 | 0 | 1.038921  | 14.253883 | 7.630061  |
| 78 | 1 | 0 | -0.136737 | 16.609850 | 11.032793 |
| 79 | 1 | 0 | 0.164912  | 16.380058 | 8.576334  |
| 80 | 6 | 0 | 0.031955  | 9.254284  | 12.122848 |
| 81 | 6 | 0 | 0.091843  | 8.463311  | 13.272025 |
| 82 | 6 | 0 | 0.750831  | 8.920149  | 10.973974 |
| 83 | 6 | 0 | 0.888846  | 7.326927  | 13.263636 |
| 84 | 1 | 0 | -0.485299 | 8.730282  | 14.156198 |
| 85 | 6 | 0 | 1.548868  | 7.781840  | 10.990709 |
| 86 | 1 | 0 | 0.681664  | 9.540730  | 10.082913 |
| 87 | 6 | 0 | 1.634918  | 6.972144  | 12.129713 |

|     |    |   |          |           |           |
|-----|----|---|----------|-----------|-----------|
| 88  | 1  | 0 | 0.933298 | 6.698776  | 14.152815 |
| 89  | 1  | 0 | 2.118968 | 7.516041  | 10.101760 |
| 90  | 6  | 0 | 2.491584 | 5.747490  | 12.137344 |
| 91  | 1  | 0 | 3.000937 | 5.617465  | 13.099289 |
| 92  | 1  | 0 | 1.886783 | 4.844852  | 11.977239 |
| 93  | 1  | 0 | 3.247202 | 5.776845  | 11.345582 |
| 94  | 17 | 0 | 2.403565 | 15.471567 | 19.559994 |
| 95  | 28 | 0 | 2.436514 | 12.931534 | 15.926434 |
| 96  | 6  | 0 | 6.154861 | 14.788051 | 15.015550 |
| 97  | 6  | 0 | 5.369828 | 15.783846 | 14.440966 |
| 98  | 6  | 0 | 5.897274 | 16.842343 | 13.714148 |
| 99  | 6  | 0 | 7.280596 | 16.892783 | 13.560672 |
| 100 | 6  | 0 | 8.089140 | 15.919028 | 14.150783 |
| 101 | 6  | 0 | 7.540246 | 14.870951 | 14.889848 |
| 102 | 6  | 0 | 5.312872 | 13.779496 | 15.789571 |
| 103 | 1  | 0 | 5.249805 | 17.600129 | 13.276933 |
| 104 | 1  | 0 | 7.732595 | 17.699340 | 12.987235 |
| 105 | 1  | 0 | 9.169508 | 15.976923 | 14.033864 |
| 106 | 1  | 0 | 8.185574 | 14.128234 | 15.350583 |
| 107 | 16 | 0 | 3.668209 | 15.508228 | 14.856991 |
| 108 | 8  | 0 | 2.782402 | 15.570309 | 13.682240 |
| 109 | 8  | 0 | 3.283965 | 16.426439 | 15.948001 |
| 110 | 6  | 0 | 5.636642 | 12.301452 | 15.561200 |
| 111 | 8  | 0 | 4.802481 | 11.428590 | 15.667910 |
| 112 | 8  | 0 | 6.942783 | 12.084667 | 15.378607 |
| 113 | 6  | 0 | 7.348176 | 10.705979 | 15.418848 |
| 114 | 1  | 0 | 6.697615 | 10.087757 | 14.794991 |
| 115 | 1  | 0 | 8.372692 | 10.690277 | 15.044142 |
| 116 | 1  | 0 | 7.316155 | 10.348170 | 16.455241 |
| 117 | 7  | 0 | 3.940192 | 13.960751 | 15.299508 |
| 118 | 6  | 0 | 6.173355 | 13.033773 | 18.157052 |
| 119 | 6  | 0 | 5.609350 | 15.373262 | 17.815557 |
| 120 | 6  | 0 | 6.744433 | 13.339934 | 19.359114 |

|     |   |   |          |           |           |
|-----|---|---|----------|-----------|-----------|
| 121 | 1 | 0 | 6.161833 | 11.988010 | 17.852197 |
| 122 | 6 | 0 | 6.183725 | 15.692915 | 19.014572 |
| 123 | 1 | 0 | 5.161789 | 16.167728 | 17.221616 |
| 124 | 6 | 0 | 6.769254 | 14.683373 | 19.826560 |
| 125 | 1 | 0 | 7.193752 | 12.559346 | 19.972443 |
| 126 | 1 | 0 | 6.201609 | 16.728049 | 19.346459 |
| 127 | 7 | 0 | 7.334956 | 14.971254 | 21.007416 |
| 128 | 1 | 0 | 7.749772 | 14.206888 | 21.525568 |
| 129 | 6 | 0 | 7.420231 | 16.294919 | 21.579758 |
| 130 | 1 | 0 | 6.425294 | 16.745098 | 21.680937 |
| 131 | 1 | 0 | 7.867176 | 16.214075 | 22.571453 |
| 132 | 1 | 0 | 8.043023 | 16.959663 | 20.967986 |
| 133 | 6 | 0 | 5.489593 | 14.015600 | 17.349176 |
| 134 | 1 | 0 | 4.238022 | 13.731984 | 17.637244 |

Imaginary frequency:  $-1527.7 \text{ cm}^{-1}$ .

Energies:

|                                              |              |
|----------------------------------------------|--------------|
| Sum of electronic and zero-point Energies=   | -4659.253403 |
| Sum of electronic and thermal Energies=      | -4659.187261 |
| Sum of electronic and thermal Enthalpies=    | -4659.186317 |
| Sum of electronic and thermal Free Energies= | -4659.349944 |

**TS-1'**

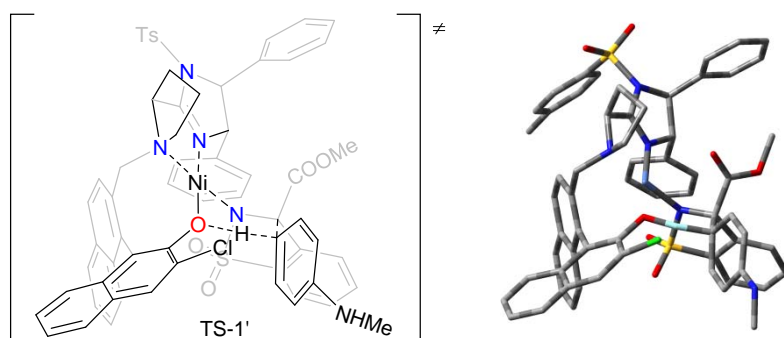

| Center Number | Atomic Number | Atomic Type | Coordinates (Angstroms) |           |           |
|---------------|---------------|-------------|-------------------------|-----------|-----------|
|               |               |             | X                       | Y         | Z         |
| 1             | 6             | 0           | 2.556622                | 14.008086 | 19.930267 |



|    |   |   |           |           |           |
|----|---|---|-----------|-----------|-----------|
| 2  | 1 | 0 | 2.590193  | 14.266219 | 22.047531 |
| 3  | 6 | 0 | 2.702015  | 13.570660 | 21.218474 |
| 4  | 6 | 0 | 2.706362  | 13.145140 | 18.802831 |
| 5  | 6 | 0 | 2.931984  | 12.204419 | 21.475946 |
| 6  | 8 | 0 | 2.556165  | 13.700118 | 17.575679 |
| 7  | 6 | 0 | 2.913596  | 11.778839 | 19.026367 |
| 8  | 6 | 0 | 3.036831  | 11.728547 | 22.806075 |
| 9  | 6 | 0 | 2.990080  | 11.290195 | 20.375629 |
| 10 | 6 | 0 | 2.901507  | 10.785151 | 17.915424 |
| 11 | 1 | 0 | 2.996502  | 12.454028 | 23.618077 |
| 12 | 6 | 0 | 3.167148  | 10.385777 | 23.065224 |
| 13 | 6 | 0 | 3.091236  | 9.907220  | 20.689398 |
| 14 | 6 | 0 | 4.041182  | 9.950597  | 17.663817 |
| 15 | 6 | 0 | 1.720703  | 10.552263 | 17.206545 |
| 16 | 1 | 0 | 3.242679  | 10.026651 | 24.089704 |
| 17 | 6 | 0 | 3.180173  | 9.471387  | 21.992009 |
| 18 | 1 | 0 | 3.093846  | 9.173550  | 19.887957 |
| 19 | 6 | 0 | 5.265393  | 10.098345 | 18.363661 |
| 20 | 6 | 0 | 3.951653  | 8.908075  | 16.687108 |
| 21 | 6 | 0 | 1.654672  | 9.511382  | 16.249585 |
| 22 | 6 | 0 | 0.496249  | 11.393420 | 17.427010 |
| 23 | 1 | 0 | 3.254410  | 8.404241  | 22.194296 |
| 24 | 1 | 0 | 5.360922  | 10.899600 | 19.091043 |
| 25 | 6 | 0 | 6.334239  | 9.269740  | 18.113397 |
| 26 | 6 | 0 | 5.072633  | 8.077556  | 16.442694 |
| 27 | 6 | 0 | 2.738425  | 8.713615  | 15.990586 |
| 28 | 1 | 0 | 0.714026  | 9.337323  | 15.726340 |
| 29 | 7 | 0 | 0.350058  | 12.436980 | 16.362479 |
| 30 | 1 | 0 | -0.418673 | 10.784343 | 17.439783 |
| 31 | 1 | 0 | 0.546734  | 11.923554 | 18.381224 |
| 32 | 1 | 0 | 7.264294  | 9.408630  | 18.662195 |
| 33 | 6 | 0 | 6.241909  | 8.249691  | 17.142473 |
| 34 | 1 | 0 | 4.980987  | 7.294919  | 15.688963 |

|    |    |   |           |           |           |
|----|----|---|-----------|-----------|-----------|
| 35 | 1  | 0 | 2.676406  | 7.911682  | 15.253873 |
| 36 | 6  | 0 | -0.393743 | 13.639807 | 16.876959 |
| 37 | 6  | 0 | -0.435951 | 11.945644 | 15.160768 |
| 38 | 1  | 0 | 7.097921  | 7.605439  | 16.949245 |
| 39 | 1  | 0 | 0.319342  | 14.321702 | 17.349388 |
| 40 | 1  | 0 | -1.111678 | 13.298112 | 17.636587 |
| 41 | 6  | 0 | -1.114269 | 14.185820 | 15.669900 |
| 42 | 6  | 0 | -1.624924 | 12.912786 | 15.017031 |
| 43 | 1  | 0 | -0.779244 | 10.920532 | 15.339958 |
| 44 | 6  | 0 | 0.470326  | 12.001180 | 13.978885 |
| 45 | 1  | 0 | -0.411218 | 14.714406 | 15.012183 |
| 46 | 1  | 0 | -1.916106 | 14.876874 | 15.945626 |
| 47 | 1  | 0 | -1.932195 | 13.031066 | 13.975229 |
| 48 | 1  | 0 | -2.478548 | 12.508700 | 15.573172 |
| 49 | 7  | 0 | 1.701182  | 12.388472 | 14.118030 |
| 50 | 7  | 0 | 0.070120  | 11.845546 | 12.671231 |
| 51 | 6  | 0 | 2.345135  | 12.531335 | 12.798328 |
| 52 | 16 | 0 | -1.031107 | 10.642276 | 12.104257 |
| 53 | 6  | 0 | 1.176056  | 12.277986 | 11.785043 |
| 54 | 1  | 0 | 2.673780  | 13.572456 | 12.712294 |
| 55 | 8  | 0 | -2.066812 | 10.555019 | 13.123855 |
| 56 | 8  | 0 | -1.306960 | 11.045510 | 10.735727 |
| 57 | 1  | 0 | 1.451523  | 11.449517 | 11.118751 |
| 58 | 6  | 0 | 3.527812  | 11.636354 | 12.563868 |
| 59 | 6  | 0 | 4.688878  | 12.177591 | 12.009120 |
| 60 | 6  | 0 | 3.454224  | 10.261486 | 12.796536 |
| 61 | 6  | 0 | 5.771208  | 11.358239 | 11.701839 |
| 62 | 1  | 0 | 4.739641  | 13.252283 | 11.819203 |
| 63 | 6  | 0 | 4.540188  | 9.443307  | 12.499989 |
| 64 | 1  | 0 | 2.545704  | 9.828032  | 13.220972 |
| 65 | 6  | 0 | 5.699755  | 9.989765  | 11.952650 |
| 66 | 1  | 0 | 6.673626  | 11.789552 | 11.270859 |
| 67 | 1  | 0 | 4.484851  | 8.373384  | 12.702611 |

|     |    |   |           |           |           |
|-----|----|---|-----------|-----------|-----------|
| 68  | 1  | 0 | 6.547698  | 9.347893  | 11.719359 |
| 69  | 6  | 0 | 0.812266  | 13.494723 | 10.975298 |
| 70  | 6  | 0 | 1.596395  | 13.827190 | 9.865148  |
| 71  | 6  | 0 | -0.234564 | 14.340208 | 11.348790 |
| 72  | 6  | 0 | 1.339578  | 14.991484 | 9.145831  |
| 73  | 1  | 0 | 2.412115  | 13.167959 | 9.565552  |
| 74  | 6  | 0 | -0.491547 | 15.503503 | 10.627475 |
| 75  | 1  | 0 | -0.863057 | 14.078737 | 12.199428 |
| 76  | 6  | 0 | 0.296659  | 15.834926 | 9.527525  |
| 77  | 1  | 0 | 1.952632  | 15.237878 | 8.280667  |
| 78  | 1  | 0 | -1.314951 | 16.150410 | 10.925382 |
| 79  | 1  | 0 | 0.092705  | 16.742509 | 8.962113  |
| 80  | 6  | 0 | -0.087671 | 9.154916  | 12.103944 |
| 81  | 6  | 0 | -0.082766 | 8.361746  | 13.253649 |
| 82  | 6  | 0 | 0.696239  | 8.832915  | 10.995195 |
| 83  | 6  | 0 | 0.729541  | 7.237686  | 13.288743 |
| 84  | 1  | 0 | -0.719490 | 8.617676  | 14.098424 |
| 85  | 6  | 0 | 1.506881  | 7.705224  | 11.055262 |
| 86  | 1  | 0 | 0.667365  | 9.450757  | 10.100001 |
| 87  | 6  | 0 | 1.543518  | 6.896740  | 12.197585 |
| 88  | 1  | 0 | 0.734297  | 6.609209  | 14.178855 |
| 89  | 1  | 0 | 2.128422  | 7.448138  | 10.198911 |
| 90  | 6  | 0 | 2.428373  | 5.693693  | 12.261592 |
| 91  | 1  | 0 | 2.982366  | 5.653819  | 13.208222 |
| 92  | 1  | 0 | 1.842127  | 4.767043  | 12.204382 |
| 93  | 1  | 0 | 3.152012  | 5.678838  | 11.440169 |
| 94  | 17 | 0 | 2.093083  | 15.666623 | 19.663110 |
| 95  | 28 | 0 | 2.214751  | 12.958738 | 15.835562 |
| 96  | 6  | 0 | 5.639211  | 15.182151 | 14.877812 |
| 97  | 6  | 0 | 6.346075  | 13.990987 | 14.983532 |
| 98  | 6  | 0 | 7.697975  | 13.885021 | 14.685545 |
| 99  | 6  | 0 | 8.356448  | 15.038519 | 14.266532 |
| 100 | 6  | 0 | 7.670353  | 16.253791 | 14.184257 |

|     |    |   |          |           |           |
|-----|----|---|----------|-----------|-----------|
| 101 | 6  | 0 | 6.314000 | 16.338300 | 14.494675 |
| 102 | 6  | 0 | 4.181170 | 15.032420 | 15.297771 |
| 103 | 1  | 0 | 8.219298 | 12.933643 | 14.776938 |
| 104 | 1  | 0 | 9.413308 | 14.995472 | 14.011581 |
| 105 | 1  | 0 | 8.203346 | 17.149206 | 13.870281 |
| 106 | 1  | 0 | 5.789812 | 17.290239 | 14.427165 |
| 107 | 16 | 0 | 5.288011 | 12.762636 | 15.705847 |
| 108 | 8  | 0 | 5.556068 | 12.779871 | 17.158640 |
| 109 | 8  | 0 | 5.355046 | 11.454203 | 15.058178 |
| 110 | 6  | 0 | 3.165592 | 15.546116 | 14.272422 |
| 111 | 8  | 0 | 1.963769 | 15.405874 | 14.422816 |
| 112 | 8  | 0 | 3.722225 | 16.095758 | 13.195369 |
| 113 | 6  | 0 | 2.797991 | 16.516923 | 12.172340 |
| 114 | 1  | 0 | 2.121747 | 17.283664 | 12.561851 |
| 115 | 1  | 0 | 3.417750 | 16.919941 | 11.371028 |
| 116 | 1  | 0 | 2.216567 | 15.661420 | 11.817573 |
| 117 | 7  | 0 | 3.925406 | 13.572814 | 15.261345 |
| 118 | 6  | 0 | 3.149766 | 16.961491 | 16.696347 |
| 119 | 6  | 0 | 5.064801 | 15.780875 | 17.600947 |
| 120 | 6  | 0 | 3.348294 | 17.974793 | 17.591287 |
| 121 | 1  | 0 | 2.325385 | 17.059557 | 15.994054 |
| 122 | 6  | 0 | 5.256313 | 16.774381 | 18.521862 |
| 123 | 1  | 0 | 5.748861 | 14.934971 | 17.600133 |
| 124 | 6  | 0 | 4.407557 | 17.912591 | 18.537369 |
| 125 | 1  | 0 | 2.693424 | 18.844993 | 17.593336 |
| 126 | 1  | 0 | 6.078492 | 16.703663 | 19.229770 |
| 127 | 7  | 0 | 4.583956 | 18.912586 | 19.413737 |
| 128 | 1  | 0 | 3.950003 | 19.699703 | 19.357949 |
| 129 | 6  | 0 | 5.645434 | 18.973836 | 20.391466 |
| 130 | 1  | 0 | 6.633000 | 18.962878 | 19.913553 |
| 131 | 1  | 0 | 5.542385 | 19.901874 | 20.955370 |
| 132 | 1  | 0 | 5.590116 | 18.131901 | 21.092869 |
| 133 | 6  | 0 | 3.953898 | 15.763560 | 16.680811 |

|     |   |   |          |           |           |
|-----|---|---|----------|-----------|-----------|
| 134 | 1 | 0 | 3.197238 | 14.757652 | 17.308315 |
|-----|---|---|----------|-----------|-----------|

Imaginary frequency: -1444.7 cm<sup>-1</sup>.

Energies:

|                                              |              |
|----------------------------------------------|--------------|
| Sum of electronic and zero-point Energies=   | -4659.247576 |
| Sum of electronic and thermal Energies=      | -4659.181554 |
| Sum of electronic and thermal Enthalpies=    | -4659.180610 |
| Sum of electronic and thermal Free Energies= | -4659.343373 |

Optimized Structure of Intermediate **11a**

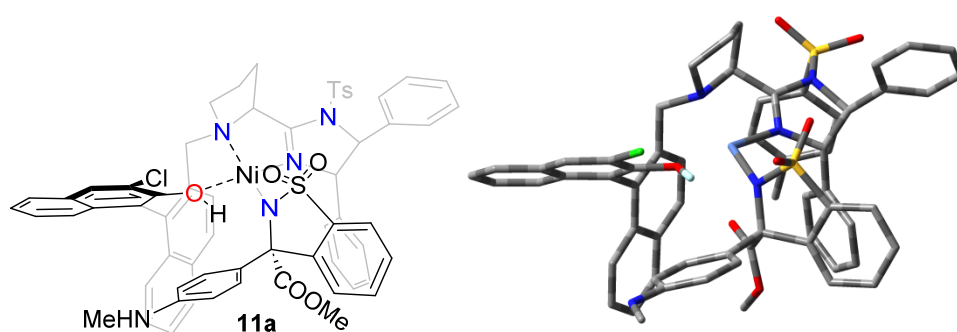

| Center Number | Atomic Number | Atomic Type | Coordinates (Angstroms) |           |          |
|---------------|---------------|-------------|-------------------------|-----------|----------|
|               |               |             | X                       | Y         | Z        |
| 1             | 6             | 0           | -0.566453               | 1.286968  | 4.666243 |
| 2             | 1             | 0           | -0.851717               | 1.580368  | 6.763007 |
| 3             | 6             | 0           | -0.747813               | 0.860422  | 5.954543 |
| 4             | 6             | 0           | -0.417570               | 0.359100  | 3.607270 |
| 5             | 6             | 0           | -0.818390               | -0.524376 | 6.231865 |
| 6             | 8             | 0           | -0.240554               | 0.828455  | 2.328006 |
| 7             | 6             | 0           | -0.444516               | -1.004337 | 3.833274 |
| 8             | 6             | 0           | -1.030935               | -0.989048 | 7.552921 |
| 9             | 6             | 0           | -0.674349               | -1.471239 | 5.165992 |
| 10            | 6             | 0           | -0.236797               | -1.947186 | 2.700731 |
| 11            | 1             | 0           | -1.137127               | -0.254539 | 8.350099 |
| 12            | 6             | 0           | -1.104457               | -2.335311 | 7.820843 |
| 13            | 6             | 0           | -0.763198               | -2.850882 | 5.479005 |
| 14            | 6             | 0           | 0.964481                | -2.722961 | 2.645406 |

|    |   |   |           |           |           |
|----|---|---|-----------|-----------|-----------|
| 15 | 6 | 0 | -1.198369 | -2.092259 | 1.706274  |
| 16 | 1 | 0 | -1.268129 | -2.681932 | 8.839281  |
| 17 | 6 | 0 | -0.971330 | -3.270540 | 6.773350  |
| 18 | 1 | 0 | -0.666332 | -3.584562 | 4.681204  |
| 19 | 6 | 0 | 2.001783  | -2.587433 | 3.603091  |
| 20 | 6 | 0 | 1.140077  | -3.671771 | 1.587993  |
| 21 | 6 | 0 | -0.993970 | -3.017297 | 0.653912  |
| 22 | 6 | 0 | -2.475535 | -1.308146 | 1.758823  |
| 23 | 1 | 0 | -1.036078 | -4.335125 | 6.990461  |
| 24 | 1 | 0 | 1.895927  | -1.857524 | 4.403756  |
| 25 | 6 | 0 | 3.138141  | -3.362595 | 3.535429  |
| 26 | 6 | 0 | 2.314410  | -4.462263 | 1.552797  |
| 27 | 6 | 0 | 0.135523  | -3.792486 | 0.598288  |
| 28 | 1 | 0 | -1.766560 | -3.119206 | -0.111458 |
| 29 | 7 | 0 | -2.530548 | -0.160589 | 0.786802  |
| 30 | 1 | 0 | -3.344428 | -1.951875 | 1.564571  |
| 31 | 1 | 0 | -2.615373 | -0.878690 | 2.753713  |
| 32 | 1 | 0 | 3.920291  | -3.239749 | 4.282411  |
| 33 | 6 | 0 | 3.293925  | -4.317354 | 2.508904  |
| 34 | 1 | 0 | 2.428758  | -5.186062 | 0.745470  |
| 35 | 1 | 0 | 0.273110  | -4.516984 | -0.205386 |
| 36 | 6 | 0 | -3.288866 | 1.001739  | 1.387305  |
| 37 | 6 | 0 | -3.269302 | -0.501977 | -0.497641 |
| 38 | 1 | 0 | 4.192442  | -4.930453 | 2.471904  |
| 39 | 1 | 0 | -2.593970 | 1.636663  | 1.946659  |
| 40 | 1 | 0 | -4.032566 | 0.598247  | 2.088820  |
| 41 | 6 | 0 | -3.972136 | 1.662625  | 0.218463  |
| 42 | 6 | 0 | -4.471396 | 0.455172  | -0.555826 |
| 43 | 1 | 0 | -3.573884 | -1.554706 | -0.472004 |
| 44 | 6 | 0 | -2.336685 | -0.260760 | -1.631842 |
| 45 | 1 | 0 | -3.252648 | 2.246184  | -0.374380 |
| 46 | 1 | 0 | -4.776117 | 2.331460  | 0.538215  |
| 47 | 1 | 0 | -4.771440 | 0.669681  | -1.584314 |

|    |    |   |           |           |           |
|----|----|---|-----------|-----------|-----------|
| 48 | 1  | 0 | -5.322671 | -0.009235 | -0.044334 |
| 49 | 7  | 0 | -1.136615 | 0.184683  | -1.413258 |
| 50 | 7  | 0 | -2.683560 | -0.323743 | -2.958272 |
| 51 | 6  | 0 | -0.434843 | 0.414810  | -2.693105 |
| 52 | 16 | 0 | -3.725422 | -1.521143 | -3.647540 |
| 53 | 6  | 0 | -1.536897 | 0.166988  | -3.776546 |
| 54 | 1  | 0 | -0.130676 | 1.467355  | -2.713606 |
| 55 | 8  | 0 | -4.818177 | -1.678041 | -2.698942 |
| 56 | 8  | 0 | -3.928451 | -1.062636 | -5.010698 |
| 57 | 1  | 0 | -1.213454 | -0.643925 | -4.442670 |
| 58 | 6  | 0 | 0.761881  | -0.475982 | -2.892757 |
| 59 | 6  | 0 | 1.971086  | 0.070667  | -3.324354 |
| 60 | 6  | 0 | 0.651242  | -1.863805 | -2.749283 |
| 61 | 6  | 0 | 3.061714  | -0.754661 | -3.598010 |
| 62 | 1  | 0 | 2.053264  | 1.150056  | -3.457245 |
| 63 | 6  | 0 | 1.735637  | -2.688463 | -3.029250 |
| 64 | 1  | 0 | -0.296972 | -2.299348 | -2.423960 |
| 65 | 6  | 0 | 2.944954  | -2.134668 | -3.453836 |
| 66 | 1  | 0 | 4.001475  | -0.316083 | -3.930971 |
| 67 | 1  | 0 | 1.638326  | -3.768407 | -2.917558 |
| 68 | 1  | 0 | 3.794474  | -2.779978 | -3.671361 |
| 69 | 6  | 0 | -1.907765 | 1.373097  | -4.589151 |
| 70 | 6  | 0 | -1.624918 | 1.404567  | -5.955128 |
| 71 | 6  | 0 | -2.503754 | 2.483513  | -3.983177 |
| 72 | 6  | 0 | -1.929119 | 2.534913  | -6.710557 |
| 73 | 1  | 0 | -1.168306 | 0.533643  | -6.427032 |
| 74 | 6  | 0 | -2.810503 | 3.610639  | -4.737883 |
| 75 | 1  | 0 | -2.718585 | 2.465510  | -2.914704 |
| 76 | 6  | 0 | -2.522526 | 3.638905  | -6.102817 |
| 77 | 1  | 0 | -1.707342 | 2.549934  | -7.776117 |
| 78 | 1  | 0 | -3.275716 | 4.470873  | -4.259601 |
| 79 | 1  | 0 | -2.764818 | 4.521576  | -6.691965 |
| 80 | 6  | 0 | -2.739335 | -2.982106 | -3.654333 |

|     |    |   |           |           |           |
|-----|----|---|-----------|-----------|-----------|
| 81  | 6  | 0 | -2.736571 | -3.798288 | -2.520949 |
| 82  | 6  | 0 | -1.920354 | -3.257737 | -4.749963 |
| 83  | 6  | 0 | -1.894392 | -4.900741 | -2.490682 |
| 84  | 1  | 0 | -3.392046 | -3.578044 | -1.680107 |
| 85  | 6  | 0 | -1.082711 | -4.365805 | -4.696279 |
| 86  | 1  | 0 | -1.945323 | -2.619636 | -5.631287 |
| 87  | 6  | 0 | -1.052026 | -5.199930 | -3.572280 |
| 88  | 1  | 0 | -1.892219 | -5.546936 | -1.613271 |
| 89  | 1  | 0 | -0.436523 | -4.588441 | -5.544011 |
| 90  | 6  | 0 | -0.149534 | -6.390399 | -3.523597 |
| 91  | 1  | 0 | 0.361299  | -6.471744 | -2.556209 |
| 92  | 1  | 0 | -0.718472 | -7.320607 | -3.653793 |
| 93  | 1  | 0 | 0.608571  | -6.357027 | -4.312681 |
| 94  | 17 | 0 | -0.481727 | 2.987123  | 4.289690  |
| 95  | 28 | 0 | -0.731752 | 0.584427  | 0.364073  |
| 96  | 6  | 0 | 2.754854  | 2.376598  | -0.954741 |
| 97  | 6  | 0 | 1.861069  | 3.306963  | -1.475238 |
| 98  | 6  | 0 | 2.166723  | 4.140016  | -2.544334 |
| 99  | 6  | 0 | 3.431930  | 4.019492  | -3.113283 |
| 100 | 6  | 0 | 4.357819  | 3.116402  | -2.583847 |
| 101 | 6  | 0 | 4.035911  | 2.302902  | -1.498386 |
| 102 | 6  | 0 | 2.169030  | 1.579452  | 0.210858  |
| 103 | 1  | 0 | 1.439186  | 4.854632  | -2.924876 |
| 104 | 1  | 0 | 3.703124  | 4.639180  | -3.965257 |
| 105 | 1  | 0 | 5.348818  | 3.042504  | -3.027634 |
| 106 | 1  | 0 | 4.766716  | 1.604431  | -1.099948 |
| 107 | 16 | 0 | 0.389779  | 3.299204  | -0.491076 |
| 108 | 8  | 0 | -0.846316 | 3.221602  | -1.284685 |
| 109 | 8  | 0 | 0.465629  | 4.415876  | 0.463526  |
| 110 | 6  | 0 | 2.342613  | 0.064387  | 0.059442  |
| 111 | 8  | 0 | 1.447675  | -0.741585 | 0.216663  |
| 112 | 8  | 0 | 3.618394  | -0.258825 | -0.147520 |
| 113 | 6  | 0 | 3.918964  | -1.663634 | -0.087232 |



|     |   |   |          |           |           |
|-----|---|---|----------|-----------|-----------|
| 114 | 1 | 0 | 3.190183 | -2.238466 | -0.663515 |
| 115 | 1 | 0 | 4.918692 | -1.769357 | -0.511223 |
| 116 | 1 | 0 | 3.913047 | -1.987698 | 0.959396  |
| 117 | 7 | 0 | 0.708662 | 1.854563  | 0.221495  |
| 118 | 6 | 0 | 2.809091 | 1.058682  | 2.630142  |
| 119 | 6 | 0 | 3.285246 | 3.253754  | 1.797119  |
| 120 | 6 | 0 | 3.271667 | 1.422365  | 3.882449  |
| 121 | 1 | 0 | 2.438393 | 0.040600  | 2.493795  |
| 122 | 6 | 0 | 3.759405 | 3.632297  | 3.047123  |
| 123 | 1 | 0 | 3.297966 | 3.987702  | 0.992014  |
| 124 | 6 | 0 | 3.752224 | 2.725881  | 4.124345  |
| 125 | 1 | 0 | 3.266003 | 0.695465  | 4.695698  |
| 126 | 1 | 0 | 4.136224 | 4.642934  | 3.187957  |
| 127 | 7 | 0 | 4.165872 | 3.081484  | 5.385193  |
| 128 | 1 | 0 | 4.388683 | 2.306956  | 5.996167  |
| 129 | 6 | 0 | 4.900108 | 4.298109  | 5.631182  |
| 130 | 1 | 0 | 4.280028 | 5.177387  | 5.417759  |
| 131 | 1 | 0 | 5.175426 | 4.332793  | 6.687751  |
| 132 | 1 | 0 | 5.819662 | 4.377925  | 5.028431  |
| 133 | 6 | 0 | 2.799021 | 1.965618  | 1.557677  |
| 134 | 1 | 0 | 0.269640 | 1.670083  | 2.286840  |

Number of imaginary frequency: 0

Energies:

|                                              |              |
|----------------------------------------------|--------------|
| Sum of electronic and zero-point Energies=   | -4659.272072 |
| Sum of electronic and thermal Energies=      | -4659.205181 |
| Sum of electronic and thermal Enthalpies=    | -4659.204236 |
| Sum of electronic and thermal Free Energies= | -4659.371255 |

### Optimized Structure of Intermediate **11b**

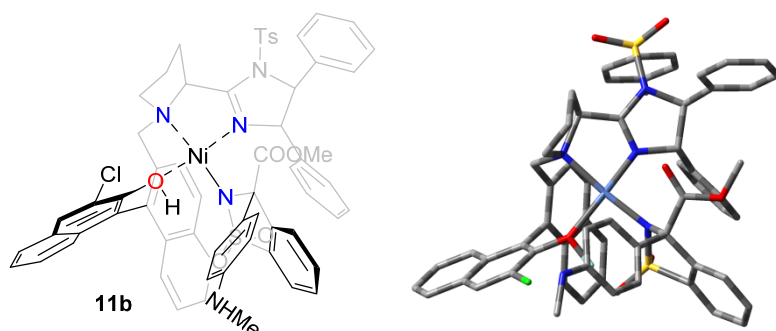

| Center Number | Atomic Number | Atomic Type | Coordinates (Angstroms) |           |           |
|---------------|---------------|-------------|-------------------------|-----------|-----------|
|               |               |             | X                       | Y         | Z         |
| 1             | 6             | 0           | 3.288210                | 13.558908 | 20.268268 |
| 2             | 1             | 0           | 3.360837                | 13.639075 | 22.400654 |
| 3             | 6             | 0           | 3.275682                | 13.004204 | 21.521554 |
| 4             | 6             | 0           | 3.188280                | 12.750716 | 19.104819 |
| 5             | 6             | 0           | 3.149331                | 11.606137 | 21.675583 |
| 6             | 8             | 0           | 3.204301                | 13.404020 | 17.872531 |
| 7             | 6             | 0           | 3.121006                | 11.375283 | 19.211718 |
| 8             | 6             | 0           | 3.104240                | 11.012552 | 22.961001 |
| 9             | 6             | 0           | 3.069387                | 10.777169 | 20.513096 |
| 10            | 6             | 0           | 3.054572                | 10.508788 | 18.009022 |
| 11            | 1             | 0           | 3.168845                | 11.659504 | 23.834768 |
| 12            | 6             | 0           | 2.974598                | 9.651086  | 23.100546 |
| 13            | 6             | 0           | 2.928740                | 9.378377  | 20.694959 |
| 14            | 6             | 0           | 4.166326                | 9.676429  | 17.671666 |
| 15            | 6             | 0           | 1.887053                | 10.453186 | 17.257701 |
| 16            | 1             | 0           | 2.938835                | 9.204109  | 24.092081 |
| 17            | 6             | 0           | 2.883181                | 8.830618  | 21.956983 |
| 18            | 1             | 0           | 2.851316                | 8.731333  | 19.824051 |
| 19            | 6             | 0           | 5.393721                | 9.723757  | 18.379419 |
| 20            | 6             | 0           | 4.048484                | 8.767823  | 16.572191 |
| 21            | 6             | 0           | 1.781806                | 9.531078  | 16.189783 |
| 22            | 6             | 0           | 0.743399                | 11.371031 | 17.565611 |
| 23            | 1             | 0           | 2.772631                | 7.754329  | 22.073145 |
| 24            | 1             | 0           | 5.503994                | 10.418041 | 19.210535 |

|    |    |   |           |           |           |
|----|----|---|-----------|-----------|-----------|
| 25 | 6  | 0 | 6.452330  | 8.925934  | 18.011619 |
| 26 | 6  | 0 | 5.154381  | 7.955346  | 16.224161 |
| 27 | 6  | 0 | 2.828330  | 8.708998  | 15.857616 |
| 28 | 1  | 0 | 0.842437  | 9.470046  | 15.639627 |
| 29 | 7  | 0 | 0.676821  | 12.534032 | 16.616459 |
| 30 | 1  | 0 | -0.222982 | 10.850299 | 17.525716 |
| 31 | 1  | 0 | 0.839406  | 11.792204 | 18.568987 |
| 32 | 1  | 0 | 7.390426  | 8.986593  | 18.560230 |
| 33 | 6  | 0 | 6.334555  | 8.033179  | 16.925532 |
| 34 | 1  | 0 | 5.049934  | 7.265399  | 15.386754 |
| 35 | 1  | 0 | 2.732235  | 7.995594  | 15.037961 |
| 36 | 6  | 0 | 0.089303  | 13.748607 | 17.287084 |
| 37 | 6  | 0 | -0.228353 | 12.247448 | 15.430218 |
| 38 | 1  | 0 | 7.180382  | 7.408228  | 16.645437 |
| 39 | 1  | 0 | 0.885957  | 14.290198 | 17.808804 |
| 40 | 1  | 0 | -0.646525 | 13.407104 | 18.028812 |
| 41 | 6  | 0 | -0.589255 | 14.497550 | 16.166623 |
| 42 | 6  | 0 | -1.282064 | 13.368505 | 15.420622 |
| 43 | 1  | 0 | -0.692413 | 11.262915 | 15.554835 |
| 44 | 6  | 0 | 0.615199  | 12.266142 | 14.209364 |
| 45 | 1  | 0 | 0.152730  | 14.987498 | 15.519042 |
| 46 | 1  | 0 | -1.282007 | 15.259197 | 16.535893 |
| 47 | 1  | 0 | -1.593624 | 13.627157 | 14.405234 |
| 48 | 1  | 0 | -2.168710 | 13.028161 | 15.966690 |
| 49 | 7  | 0 | 1.869938  | 12.592829 | 14.291768 |
| 50 | 7  | 0 | 0.156027  | 12.096248 | 12.931030 |
| 51 | 6  | 0 | 2.475733  | 12.635187 | 12.941133 |
| 52 | 16 | 0 | -1.137644 | 11.044469 | 12.452574 |
| 53 | 6  | 0 | 1.276453  | 12.309272 | 11.986917 |
| 54 | 1  | 0 | 2.793395  | 13.662376 | 12.756856 |
| 55 | 8  | 0 | -2.086168 | 11.076992 | 13.556433 |
| 56 | 8  | 0 | -1.474364 | 11.498545 | 11.115454 |
| 57 | 1  | 0 | 1.487438  | 11.361565 | 11.472979 |

|    |   |   |           |           |           |
|----|---|---|-----------|-----------|-----------|
| 58 | 6 | 0 | 3.645934  | 11.716175 | 12.744735 |
| 59 | 6 | 0 | 4.876368  | 12.239740 | 12.346854 |
| 60 | 6 | 0 | 3.493001  | 10.331879 | 12.859474 |
| 61 | 6 | 0 | 5.945529  | 11.392266 | 12.070691 |
| 62 | 1 | 0 | 4.990738  | 13.322273 | 12.260840 |
| 63 | 6 | 0 | 4.561668  | 9.483281  | 12.588771 |
| 64 | 1 | 0 | 2.523401  | 9.921150  | 13.152530 |
| 65 | 6 | 0 | 5.790127  | 10.013019 | 12.194039 |
| 66 | 1 | 0 | 6.902256  | 11.809221 | 11.759807 |
| 67 | 1 | 0 | 4.436069  | 8.404538  | 12.677803 |
| 68 | 1 | 0 | 6.624495  | 9.348595  | 11.976457 |
| 69 | 6 | 0 | 0.998674  | 13.382242 | 10.972506 |
| 70 | 6 | 0 | 1.675831  | 13.338335 | 9.750885  |
| 71 | 6 | 0 | 0.146561  | 14.454069 | 11.248549 |
| 72 | 6 | 0 | 1.507589  | 14.357686 | 8.816774  |
| 73 | 1 | 0 | 2.335975  | 12.497993 | 9.531828  |
| 74 | 6 | 0 | -0.029932 | 15.465974 | 10.309097 |
| 75 | 1 | 0 | -0.384817 | 14.491235 | 12.199294 |
| 76 | 6 | 0 | 0.653730  | 15.423740 | 9.094626  |
| 77 | 1 | 0 | 2.037450  | 14.313827 | 7.866924  |
| 78 | 1 | 0 | -0.701080 | 16.294491 | 10.529034 |
| 79 | 1 | 0 | 0.514694  | 16.216450 | 8.361828  |
| 80 | 6 | 0 | -0.378018 | 9.456713  | 12.357978 |
| 81 | 6 | 0 | -0.386681 | 8.632646  | 13.485692 |
| 82 | 6 | 0 | 0.278083  | 9.076138  | 11.185725 |
| 83 | 6 | 0 | 0.291607  | 7.423667  | 13.438051 |
| 84 | 1 | 0 | -0.935618 | 8.928894  | 14.377601 |
| 85 | 6 | 0 | 0.953220  | 7.861104  | 11.161657 |
| 86 | 1 | 0 | 0.250789  | 9.714876  | 10.304941 |
| 87 | 6 | 0 | 0.982806  | 7.023898  | 12.283433 |
| 88 | 1 | 0 | 0.285729  | 6.773286  | 14.312203 |
| 89 | 1 | 0 | 1.471246  | 7.556460  | 10.253646 |
| 90 | 6 | 0 | 1.728635  | 5.729192  | 12.261227 |

|     |    |   |          |           |           |
|-----|----|---|----------|-----------|-----------|
| 91  | 1  | 0 | 2.482347 | 5.692014  | 13.058849 |
| 92  | 1  | 0 | 1.055373 | 4.879708  | 12.431747 |
| 93  | 1  | 0 | 2.238580 | 5.570433  | 11.305884 |
| 94  | 17 | 0 | 3.470417 | 15.273843 | 20.077943 |
| 95  | 28 | 0 | 2.500431 | 13.088684 | 15.988199 |
| 96  | 6  | 0 | 5.819767 | 15.419616 | 14.595509 |
| 97  | 6  | 0 | 6.555932 | 14.286678 | 14.910007 |
| 98  | 6  | 0 | 7.907027 | 14.139249 | 14.623393 |
| 99  | 6  | 0 | 8.542682 | 15.202418 | 13.989572 |
| 100 | 6  | 0 | 7.833511 | 16.369692 | 13.691008 |
| 101 | 6  | 0 | 6.478993 | 16.489746 | 13.992446 |
| 102 | 6  | 0 | 4.354436 | 15.331111 | 15.013581 |
| 103 | 1  | 0 | 8.440985 | 13.226539 | 14.880906 |
| 104 | 1  | 0 | 9.597370 | 15.127599 | 13.733590 |
| 105 | 1  | 0 | 8.345825 | 17.199071 | 13.207760 |
| 106 | 1  | 0 | 5.940383 | 17.402244 | 13.747985 |
| 107 | 16 | 0 | 5.515266 | 13.191805 | 15.811336 |
| 108 | 8  | 0 | 5.741843 | 13.492596 | 17.265094 |
| 109 | 8  | 0 | 5.636068 | 11.780947 | 15.452096 |
| 110 | 6  | 0 | 3.387681 | 15.661550 | 13.860894 |
| 111 | 8  | 0 | 2.178573 | 15.556627 | 13.946988 |
| 112 | 8  | 0 | 4.017290 | 16.054680 | 12.751292 |
| 113 | 6  | 0 | 3.175548 | 16.356427 | 11.623629 |
| 114 | 1  | 0 | 2.367811 | 17.031717 | 11.916953 |
| 115 | 1  | 0 | 3.831453 | 16.829007 | 10.891705 |
| 116 | 1  | 0 | 2.760856 | 15.428877 | 11.216336 |
| 117 | 7  | 0 | 4.123538 | 13.857740 | 15.272831 |
| 118 | 6  | 0 | 2.712586 | 16.400519 | 16.643917 |
| 119 | 6  | 0 | 5.013069 | 17.019411 | 16.841243 |
| 120 | 6  | 0 | 2.376522 | 17.283791 | 17.650584 |
| 121 | 1  | 0 | 1.927408 | 15.804658 | 16.185184 |
| 122 | 6  | 0 | 4.695291 | 17.895714 | 17.873717 |
| 123 | 1  | 0 | 6.058307 | 16.930468 | 16.550634 |

|     |   |   |          |           |           |
|-----|---|---|----------|-----------|-----------|
| 124 | 6 | 0 | 3.362976 | 18.063855 | 18.287641 |
| 125 | 1 | 0 | 1.339893 | 17.362516 | 17.982312 |
| 126 | 1 | 0 | 5.492952 | 18.451625 | 18.361470 |
| 127 | 7 | 0 | 3.005456 | 18.952555 | 19.275035 |
| 128 | 1 | 0 | 2.098839 | 18.782360 | 19.690556 |
| 129 | 6 | 0 | 3.987899 | 19.532803 | 20.157673 |
| 130 | 1 | 0 | 4.667089 | 20.192274 | 19.603182 |
| 131 | 1 | 0 | 3.473041 | 20.138842 | 20.907042 |
| 132 | 1 | 0 | 4.601923 | 18.779412 | 20.679383 |
| 133 | 6 | 0 | 4.034940 | 16.262121 | 16.188216 |
| 134 | 1 | 0 | 4.156852 | 13.692920 | 17.718748 |

Number of imaginary frequency: 0

Energies:

|                                              |              |
|----------------------------------------------|--------------|
| Sum of electronic and zero-point Energies=   | -4659.264051 |
| Sum of electronic and thermal Energies=      | -4659.197923 |
| Sum of electronic and thermal Enthalpies=    | -4659.196978 |
| Sum of electronic and thermal Free Energies= | -4659.360169 |

Proton transfer from naphthol oxygen to sulfonamide nitrogen

**TS-2**

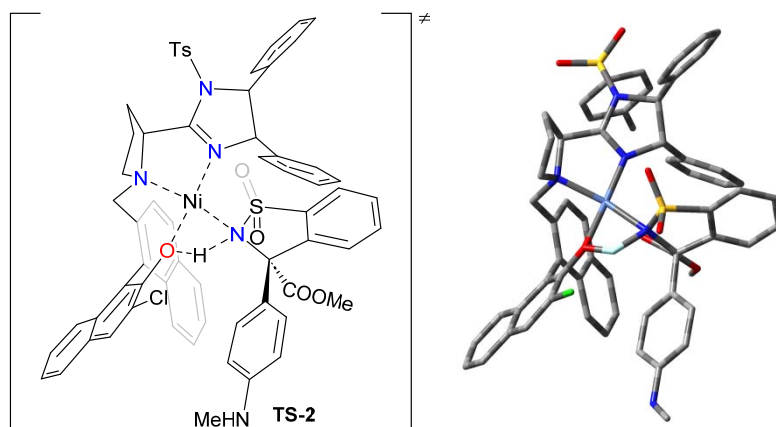

| Center Number | Atomic Number | Atomic Type | Coordinates (Angstroms) |           |           |
|---------------|---------------|-------------|-------------------------|-----------|-----------|
|               |               |             | X                       | Y         | Z         |
| 1             | 6             | 0           | 2.618261                | 13.679702 | 20.263608 |

|    |   |   |           |           |           |
|----|---|---|-----------|-----------|-----------|
| 2  | 1 | 0 | 2.635999  | 13.993209 | 22.376459 |
| 3  | 6 | 0 | 2.622222  | 13.266001 | 21.567508 |
| 4  | 6 | 0 | 2.618045  | 12.749656 | 19.186941 |
| 5  | 6 | 0 | 2.579449  | 11.885309 | 21.867776 |
| 6  | 8 | 0 | 2.561151  | 13.262145 | 17.932159 |
| 7  | 6 | 0 | 2.642305  | 11.382790 | 19.440565 |
| 8  | 6 | 0 | 2.539666  | 11.437375 | 23.210231 |
| 9  | 6 | 0 | 2.570524  | 10.931568 | 20.799819 |
| 10 | 6 | 0 | 2.784734  | 10.404481 | 18.326658 |
| 11 | 1 | 0 | 2.553154  | 12.182367 | 24.005139 |
| 12 | 6 | 0 | 2.478317  | 10.095371 | 23.503023 |
| 13 | 6 | 0 | 2.491135  | 9.556962  | 21.140836 |
| 14 | 6 | 0 | 3.977905  | 9.609263  | 18.254165 |
| 15 | 6 | 0 | 1.793235  | 10.231377 | 17.364731 |
| 16 | 1 | 0 | 2.447050  | 9.760798  | 24.537956 |
| 17 | 6 | 0 | 2.444975  | 9.151353  | 22.455825 |
| 18 | 1 | 0 | 2.459812  | 8.813180  | 20.347095 |
| 19 | 6 | 0 | 5.051894  | 9.756198  | 19.169349 |
| 20 | 6 | 0 | 4.111917  | 8.626862  | 17.220817 |
| 21 | 6 | 0 | 1.960782  | 9.276588  | 16.332366 |
| 22 | 6 | 0 | 0.520794  | 11.022237 | 17.419314 |
| 23 | 1 | 0 | 2.380893  | 8.089977  | 22.688894 |
| 24 | 1 | 0 | 4.989270  | 10.513066 | 19.948022 |
| 25 | 6 | 0 | 6.169962  | 8.955238  | 19.096108 |
| 26 | 6 | 0 | 5.270278  | 7.813399  | 17.175239 |
| 27 | 6 | 0 | 3.081560  | 8.491704  | 16.260720 |
| 28 | 1 | 0 | 1.163975  | 9.161347  | 15.595780 |
| 29 | 7 | 0 | 0.454492  | 12.120414 | 16.395178 |
| 30 | 1 | 0 | -0.361926 | 10.381677 | 17.282953 |
| 31 | 1 | 0 | 0.420743  | 11.506912 | 18.394044 |
| 32 | 1 | 0 | 6.975512  | 9.089443  | 19.815897 |
| 33 | 6 | 0 | 6.278232  | 7.963029  | 18.099907 |
| 34 | 1 | 0 | 5.347066  | 7.065972  | 16.385035 |

|    |    |   |           |           |           |
|----|----|---|-----------|-----------|-----------|
| 35 | 1  | 0 | 3.192062  | 7.748084  | 15.470326 |
| 36 | 6  | 0 | -0.349200 | 13.284174 | 16.933732 |
| 37 | 6  | 0 | -0.223188 | 11.724655 | 15.093099 |
| 38 | 1  | 0 | 7.162434  | 7.329763  | 18.058163 |
| 39 | 1  | 0 | 0.316104  | 13.952306 | 17.487770 |
| 40 | 1  | 0 | -1.097272 | 12.878659 | 17.629262 |
| 41 | 6  | 0 | -1.022250 | 13.880787 | 15.725805 |
| 42 | 6  | 0 | -1.456672 | 12.633157 | 14.976128 |
| 43 | 1  | 0 | -0.482891 | 10.658586 | 15.121380 |
| 44 | 6  | 0 | 0.746423  | 11.988749 | 13.992681 |
| 45 | 1  | 0 | -0.305044 | 14.469238 | 15.136066 |
| 46 | 1  | 0 | -1.857376 | 14.531169 | 16.000158 |
| 47 | 1  | 0 | -1.734680 | 12.809941 | 13.935115 |
| 48 | 1  | 0 | -2.304573 | 12.152787 | 15.478185 |
| 49 | 7  | 0 | 1.937506  | 12.432465 | 14.261673 |
| 50 | 7  | 0 | 0.442616  | 11.954315 | 12.654151 |
| 51 | 6  | 0 | 2.676867  | 12.697784 | 13.012413 |
| 52 | 16 | 0 | -0.545768 | 10.743547 | 11.901953 |
| 53 | 6  | 0 | 1.611021  | 12.480480 | 11.887837 |
| 54 | 1  | 0 | 2.982306  | 13.751171 | 13.029288 |
| 55 | 8  | 0 | -1.670357 | 10.542754 | 12.803501 |
| 56 | 8  | 0 | -0.704601 | 11.225932 | 10.541046 |
| 57 | 1  | 0 | 1.961735  | 11.695354 | 11.205626 |
| 58 | 6  | 0 | 3.878041  | 11.809941 | 12.825566 |
| 59 | 6  | 0 | 5.089523  | 12.361143 | 12.407594 |
| 60 | 6  | 0 | 3.768166  | 10.421841 | 12.964330 |
| 61 | 6  | 0 | 6.184477  | 11.539451 | 12.141510 |
| 62 | 1  | 0 | 5.168413  | 13.441244 | 12.276590 |
| 63 | 6  | 0 | 4.858072  | 9.600936  | 12.693959 |
| 64 | 1  | 0 | 2.817125  | 9.982246  | 13.275155 |
| 65 | 6  | 0 | 6.069750  | 10.158669 | 12.282061 |
| 66 | 1  | 0 | 7.126343  | 11.981720 | 11.819476 |
| 67 | 1  | 0 | 4.762610  | 8.520628  | 12.804085 |



|     |    |   |           |           |           |
|-----|----|---|-----------|-----------|-----------|
| 68  | 1  | 0 | 6.923198  | 9.516057  | 12.072210 |
| 69  | 6  | 0 | 1.261984  | 13.711185 | 11.102869 |
| 70  | 6  | 0 | 1.538551  | 13.764768 | 9.736138  |
| 71  | 6  | 0 | 0.698153  | 14.824278 | 11.734735 |
| 72  | 6  | 0 | 1.260302  | 14.918286 | 9.006375  |
| 73  | 1  | 0 | 1.971074  | 12.892775 | 9.243929  |
| 74  | 6  | 0 | 0.416617  | 15.974569 | 11.005658 |
| 75  | 1  | 0 | 0.488246  | 14.791678 | 12.803827 |
| 76  | 6  | 0 | 0.698464  | 16.024091 | 9.639971  |
| 77  | 1  | 0 | 1.478279  | 14.950245 | 7.940417  |
| 78  | 1  | 0 | -0.024286 | 16.836085 | 11.504255 |
| 79  | 1  | 0 | 0.476664  | 16.925056 | 9.070689  |
| 80  | 6  | 0 | 0.463954  | 9.300389  | 11.907748 |
| 81  | 6  | 0 | 0.411608  | 8.449084  | 13.014327 |
| 82  | 6  | 0 | 1.345250  | 9.067365  | 10.851579 |
| 83  | 6  | 0 | 1.263834  | 7.355178  | 13.058036 |
| 84  | 1  | 0 | -0.297685 | 8.634112  | 13.819811 |
| 85  | 6  | 0 | 2.193237  | 7.968270  | 10.919952 |
| 86  | 1  | 0 | 1.358247  | 9.728944  | 9.987307  |
| 87  | 6  | 0 | 2.172764  | 7.102035  | 12.019429 |
| 88  | 1  | 0 | 1.222244  | 6.678813  | 13.911430 |
| 89  | 1  | 0 | 2.891139  | 7.780470  | 10.105428 |
| 90  | 6  | 0 | 3.087216  | 5.921829  | 12.085042 |
| 91  | 1  | 0 | 3.565454  | 5.835749  | 13.068684 |
| 92  | 1  | 0 | 2.533789  | 4.986709  | 11.926502 |
| 93  | 1  | 0 | 3.871236  | 5.973157  | 11.322673 |
| 94  | 17 | 0 | 2.642223  | 15.380662 | 19.885567 |
| 95  | 28 | 0 | 2.278562  | 12.796315 | 16.059197 |
| 96  | 6  | 0 | 5.788947  | 14.641942 | 14.834026 |
| 97  | 6  | 0 | 4.866784  | 15.554173 | 14.334565 |
| 98  | 6  | 0 | 5.113122  | 16.359888 | 13.228879 |
| 99  | 6  | 0 | 6.353554  | 16.236012 | 12.609551 |
| 100 | 6  | 0 | 7.311270  | 15.354492 | 13.119392 |

|     |    |   |          |           |           |
|-----|----|---|----------|-----------|-----------|
| 101 | 6  | 0 | 7.043308 | 14.560087 | 14.232250 |
| 102 | 6  | 0 | 5.275515 | 13.854075 | 16.031110 |
| 103 | 1  | 0 | 4.362154 | 17.057224 | 12.862380 |
| 104 | 1  | 0 | 6.582229 | 16.838016 | 11.733016 |
| 105 | 1  | 0 | 8.283278 | 15.280541 | 12.635781 |
| 106 | 1  | 0 | 7.794920 | 13.873800 | 14.613559 |
| 107 | 16 | 0 | 3.448677 | 15.594839 | 15.388856 |
| 108 | 8  | 0 | 2.180021 | 15.470090 | 14.661348 |
| 109 | 8  | 0 | 3.570666 | 16.719937 | 16.320632 |
| 110 | 6  | 0 | 5.417985 | 12.339523 | 15.835638 |
| 111 | 8  | 0 | 4.497243 | 11.553493 | 15.934049 |
| 112 | 8  | 0 | 6.688479 | 11.999884 | 15.641532 |
| 113 | 6  | 0 | 6.968648 | 10.588623 | 15.657897 |
| 114 | 1  | 0 | 6.221667 | 10.041985 | 15.078522 |
| 115 | 1  | 0 | 7.960379 | 10.479214 | 15.216827 |
| 116 | 1  | 0 | 6.971764 | 10.240944 | 16.696670 |
| 117 | 7  | 0 | 3.811070 | 14.132953 | 16.134472 |
| 118 | 6  | 0 | 5.888007 | 13.342487 | 18.436589 |
| 119 | 6  | 0 | 6.595513 | 15.451347 | 17.536704 |
| 120 | 6  | 0 | 6.420358 | 13.676151 | 19.668180 |
| 121 | 1  | 0 | 5.397881 | 12.371554 | 18.326170 |
| 122 | 6  | 0 | 7.129308 | 15.803717 | 18.770317 |
| 123 | 1  | 0 | 6.665841 | 16.162709 | 16.714554 |
| 124 | 6  | 0 | 7.059278 | 14.919066 | 19.862958 |
| 125 | 1  | 0 | 6.350551 | 12.976700 | 20.502154 |
| 126 | 1  | 0 | 7.606160 | 16.774321 | 18.886502 |
| 127 | 7  | 0 | 7.620691 | 15.216582 | 21.080315 |
| 128 | 1  | 0 | 7.287478 | 14.657715 | 21.854450 |
| 129 | 6  | 0 | 8.045957 | 16.553177 | 21.415774 |
| 130 | 1  | 0 | 7.245255 | 17.302332 | 21.304435 |
| 131 | 1  | 0 | 8.386183 | 16.561711 | 22.453725 |
| 132 | 1  | 0 | 8.888404 | 16.864237 | 20.785367 |
| 133 | 6  | 0 | 5.967725 | 14.219509 | 17.343239 |

|     |   |   |          |           |           |
|-----|---|---|----------|-----------|-----------|
| 134 | 1 | 0 | 3.336615 | 13.931936 | 17.468500 |
|-----|---|---|----------|-----------|-----------|

Imaginary frequency:  $-1243.1 \text{ cm}^{-1}$

Energies:

|                                              |              |
|----------------------------------------------|--------------|
| Sum of electronic and zero-point Energies=   | -4659.267859 |
| Sum of electronic and thermal Energies=      | -4659.201785 |
| Sum of electronic and thermal Enthalpies=    | -4659.200841 |
| Sum of electronic and thermal Free Energies= | -4659.365057 |

**TS-2'**

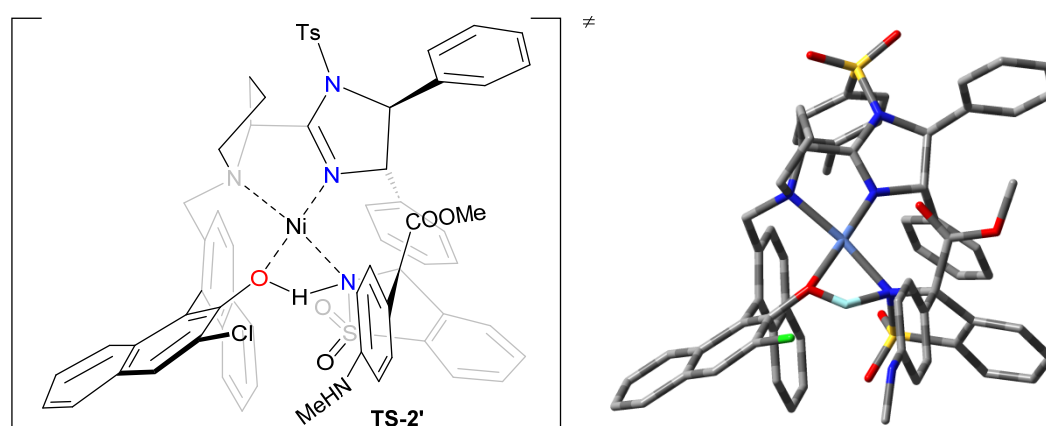

| Center Number | Atomic Number | Atomic Type | Coordinates (Angstroms) |           |           |
|---------------|---------------|-------------|-------------------------|-----------|-----------|
|               |               |             | X                       | Y         | Z         |
| 1             | 6             | 0           | 2.876295                | 13.721564 | 20.182092 |
| 2             | 1             | 0           | 3.095777                | 13.890830 | 22.299190 |
| 3             | 6             | 0           | 3.013042                | 13.218556 | 21.448048 |
| 4             | 6             | 0           | 2.773657                | 12.871647 | 19.045852 |
| 5             | 6             | 0           | 3.025954                | 11.820758 | 21.653248 |
| 6             | 8             | 0           | 2.575920                | 13.483468 | 17.839250 |
| 7             | 6             | 0           | 2.849346                | 11.493280 | 19.201340 |
| 8             | 6             | 0           | 3.121126                | 11.276884 | 22.957778 |
| 9             | 6             | 0           | 2.933839                | 10.945539 | 20.524581 |
| 10            | 6             | 0           | 2.846506                | 10.575893 | 18.030349 |
| 11            | 1             | 0           | 3.195392                | 11.963180 | 23.800632 |
| 12            | 6             | 0           | 3.112749                | 9.916678  | 23.155559 |

|    |   |   |           |           |           |
|----|---|---|-----------|-----------|-----------|
| 13 | 6 | 0 | 2.913216  | 9.548337  | 20.770167 |
| 14 | 6 | 0 | 4.018277  | 9.796966  | 17.751161 |
| 15 | 6 | 0 | 1.714180  | 10.419935 | 17.234290 |
| 16 | 1 | 0 | 3.185268  | 9.508154  | 24.161567 |
| 17 | 6 | 0 | 2.999937  | 9.049037  | 22.050022 |
| 18 | 1 | 0 | 2.819240  | 8.860853  | 19.932553 |
| 19 | 6 | 0 | 5.225589  | 9.943548  | 18.479450 |
| 20 | 6 | 0 | 3.994553  | 8.852682  | 16.675511 |
| 21 | 6 | 0 | 1.708625  | 9.466029  | 16.187758 |
| 22 | 6 | 0 | 0.483235  | 11.245902 | 17.462310 |
| 23 | 1 | 0 | 2.977527  | 7.972594  | 22.209687 |
| 24 | 1 | 0 | 5.280208  | 10.678873 | 19.278523 |
| 25 | 6 | 0 | 6.341301  | 9.201962  | 18.163517 |
| 26 | 6 | 0 | 5.154827  | 8.098149  | 16.380585 |
| 27 | 6 | 0 | 2.812905  | 8.702324  | 15.915548 |
| 28 | 1 | 0 | 0.798512  | 9.334897  | 15.602092 |
| 29 | 7 | 0 | 0.340172  | 12.348875 | 16.452639 |
| 30 | 1 | 0 | -0.431848 | 10.637773 | 17.428927 |
| 31 | 1 | 0 | 0.515618  | 11.729292 | 18.442538 |
| 32 | 1 | 0 | 7.260496  | 9.345246  | 18.728901 |
| 33 | 6 | 0 | 6.309226  | 8.268084  | 17.106894 |
| 34 | 1 | 0 | 5.113505  | 7.384998  | 15.556716 |
| 35 | 1 | 0 | 2.795846  | 7.969034  | 15.108408 |
| 36 | 6 | 0 | -0.410558 | 13.515666 | 17.046278 |
| 37 | 6 | 0 | -0.438861 | 11.948824 | 15.210559 |
| 38 | 1 | 0 | 7.199023  | 7.688507  | 16.867695 |
| 39 | 1 | 0 | 0.297156  | 14.164350 | 17.570459 |
| 40 | 1 | 0 | -1.127146 | 13.115042 | 17.777226 |
| 41 | 6 | 0 | -1.134281 | 14.138072 | 15.880962 |
| 42 | 6 | 0 | -1.639949 | 12.908445 | 15.148467 |
| 43 | 1 | 0 | -0.759640 | 10.902735 | 15.298235 |
| 44 | 6 | 0 | 0.473434  | 12.106314 | 14.043843 |
| 45 | 1 | 0 | -0.439019 | 14.713365 | 15.254414 |

|    |    |   |           |           |           |
|----|----|---|-----------|-----------|-----------|
| 46 | 1  | 0 | -1.938564 | 14.804309 | 16.205368 |
| 47 | 1  | 0 | -1.961138 | 13.096302 | 14.121964 |
| 48 | 1  | 0 | -2.481560 | 12.455585 | 15.684965 |
| 49 | 7  | 0 | 1.707639  | 12.477698 | 14.217241 |
| 50 | 7  | 0 | 0.083740  | 12.008410 | 12.729599 |
| 51 | 6  | 0 | 2.376098  | 12.633214 | 12.909933 |
| 52 | 16 | 0 | -1.054509 | 10.838485 | 12.119314 |
| 53 | 6  | 0 | 1.242220  | 12.341639 | 11.869730 |
| 54 | 1  | 0 | 2.678818  | 13.681325 | 12.820179 |
| 55 | 8  | 0 | -2.104894 | 10.759261 | 13.123137 |
| 56 | 8  | 0 | -1.300025 | 11.281276 | 10.758194 |
| 57 | 1  | 0 | 1.524636  | 11.446065 | 11.298708 |
| 58 | 6  | 0 | 3.575512  | 11.752721 | 12.704657 |
| 59 | 6  | 0 | 4.770039  | 12.310180 | 12.248603 |
| 60 | 6  | 0 | 3.480206  | 10.367283 | 12.865268 |
| 61 | 6  | 0 | 5.864783  | 11.495236 | 11.966858 |
| 62 | 1  | 0 | 4.838918  | 13.392026 | 12.109688 |
| 63 | 6  | 0 | 4.574078  | 9.554320  | 12.591297 |
| 64 | 1  | 0 | 2.543816  | 9.924212  | 13.213474 |
| 65 | 6  | 0 | 5.769646  | 10.117221 | 12.142707 |
| 66 | 1  | 0 | 6.792609  | 11.938791 | 11.609205 |
| 67 | 1  | 0 | 4.496610  | 8.475414  | 12.724930 |
| 68 | 1  | 0 | 6.624067  | 9.479533  | 11.923219 |
| 69 | 6  | 0 | 0.989974  | 13.476746 | 10.918206 |
| 70 | 6  | 0 | 1.850278  | 13.602778 | 9.822705  |
| 71 | 6  | 0 | -0.002001 | 14.437151 | 11.126495 |
| 72 | 6  | 0 | 1.726976  | 14.678463 | 8.949365  |
| 73 | 1  | 0 | 2.619293  | 12.847903 | 9.654920  |
| 74 | 6  | 0 | -0.133687 | 15.506278 | 10.241898 |
| 75 | 1  | 0 | -0.675815 | 14.343845 | 11.978250 |
| 76 | 6  | 0 | 0.732312  | 15.633261 | 9.157141  |
| 77 | 1  | 0 | 2.401778  | 14.765211 | 8.099729  |
| 78 | 1  | 0 | -0.915272 | 16.246376 | 10.404104 |

|     |    |   |           |           |           |
|-----|----|---|-----------|-----------|-----------|
| 79  | 1  | 0 | 0.627276  | 16.470322 | 8.469352  |
| 80  | 6  | 0 | -0.143395 | 9.333033  | 12.097716 |
| 81  | 6  | 0 | -0.146612 | 8.528556  | 13.239644 |
| 82  | 6  | 0 | 0.629327  | 9.008996  | 10.981215 |
| 83  | 6  | 0 | 0.649434  | 7.392320  | 13.260498 |
| 84  | 1  | 0 | -0.777129 | 8.786208  | 14.088613 |
| 85  | 6  | 0 | 1.423570  | 7.869132  | 11.027023 |
| 86  | 1  | 0 | 0.603729  | 9.635472  | 10.092085 |
| 87  | 6  | 0 | 1.453633  | 7.049926  | 12.162118 |
| 88  | 1  | 0 | 0.649737  | 6.755691  | 14.144724 |
| 89  | 1  | 0 | 2.035523  | 7.609942  | 10.164524 |
| 90  | 6  | 0 | 2.318293  | 5.831838  | 12.208655 |
| 91  | 1  | 0 | 2.838642  | 5.744961  | 13.170631 |
| 92  | 1  | 0 | 1.719319  | 4.918610  | 12.094491 |
| 93  | 1  | 0 | 3.067105  | 5.835853  | 11.410005 |
| 94  | 17 | 0 | 2.853937  | 15.443352 | 19.924188 |
| 95  | 28 | 0 | 2.151411  | 12.976080 | 15.980499 |
| 96  | 6  | 0 | 5.606540  | 15.143597 | 14.687745 |
| 97  | 6  | 0 | 6.233579  | 13.927193 | 14.913546 |
| 98  | 6  | 0 | 7.503221  | 13.618177 | 14.435612 |
| 99  | 6  | 0 | 8.163306  | 14.590087 | 13.693738 |
| 100 | 6  | 0 | 7.567193  | 15.838106 | 13.482387 |
| 101 | 6  | 0 | 6.301808  | 16.127123 | 13.981981 |
| 102 | 6  | 0 | 4.226359  | 15.277143 | 15.322946 |
| 103 | 1  | 0 | 7.955723  | 12.648330 | 14.634683 |
| 104 | 1  | 0 | 9.153515  | 14.385812 | 13.292441 |
| 105 | 1  | 0 | 8.103951  | 16.601117 | 12.922465 |
| 106 | 1  | 0 | 5.859120  | 17.106210 | 13.821538 |
| 107 | 16 | 0 | 5.261192  | 12.931589 | 15.990891 |
| 108 | 8  | 0 | 5.828202  | 12.984254 | 17.345703 |
| 109 | 8  | 0 | 4.946898  | 11.612727 | 15.446046 |
| 110 | 6  | 0 | 3.125239  | 15.595220 | 14.301681 |
| 111 | 8  | 0 | 1.955481  | 15.302656 | 14.468948 |

|     |   |   |          |           |           |
|-----|---|---|----------|-----------|-----------|
| 112 | 8 | 0 | 3.585202 | 16.267214 | 13.249454 |
| 113 | 6 | 0 | 2.617346 | 16.617530 | 12.242434 |
| 114 | 1 | 0 | 1.725252 | 17.055874 | 12.696955 |
| 115 | 1 | 0 | 3.118436 | 17.338854 | 11.596237 |
| 116 | 1 | 0 | 2.349985 | 15.721320 | 11.673310 |
| 117 | 7 | 0 | 3.902583 | 13.937062 | 15.931815 |
| 118 | 6 | 0 | 3.046408 | 17.102996 | 16.696734 |
| 119 | 6 | 0 | 5.352133 | 16.632964 | 17.155110 |
| 120 | 6 | 0 | 3.040912 | 18.062116 | 17.694597 |
| 121 | 1 | 0 | 2.121449 | 16.921953 | 16.151996 |
| 122 | 6 | 0 | 5.357508 | 17.583395 | 18.164718 |
| 123 | 1 | 0 | 6.268722 | 16.075302 | 16.965474 |
| 124 | 6 | 0 | 4.198260 | 18.329619 | 18.451908 |
| 125 | 1 | 0 | 2.128407 | 18.619493 | 17.906756 |
| 126 | 1 | 0 | 6.267853 | 17.748922 | 18.736642 |
| 127 | 7 | 0 | 4.179979 | 19.307459 | 19.414598 |
| 128 | 1 | 0 | 3.259143 | 19.592817 | 19.720741 |
| 129 | 6 | 0 | 5.230223 | 19.431142 | 20.395484 |
| 130 | 1 | 0 | 6.181707 | 19.693482 | 19.916206 |
| 131 | 1 | 0 | 4.971235 | 20.237111 | 21.085962 |
| 132 | 1 | 0 | 5.387315 | 18.507683 | 20.977241 |
| 133 | 6 | 0 | 4.205593 | 16.372681 | 16.393556 |
| 134 | 1 | 0 | 3.440605 | 13.937649 | 17.283565 |

Imaginary frequency: -1253.0 cm<sup>-1</sup>.

|                                              |              |
|----------------------------------------------|--------------|
| Sum of electronic and zero-point Energies=   | -4659.257804 |
| Sum of electronic and thermal Energies=      | -4659.191512 |
| Sum of electronic and thermal Enthalpies=    | -4659.190568 |
| Sum of electronic and thermal Free Energies= | -4659.355214 |

## Optimized Structures of Intermediates **12a** and **12b**

### Optimized Structure of **12a**

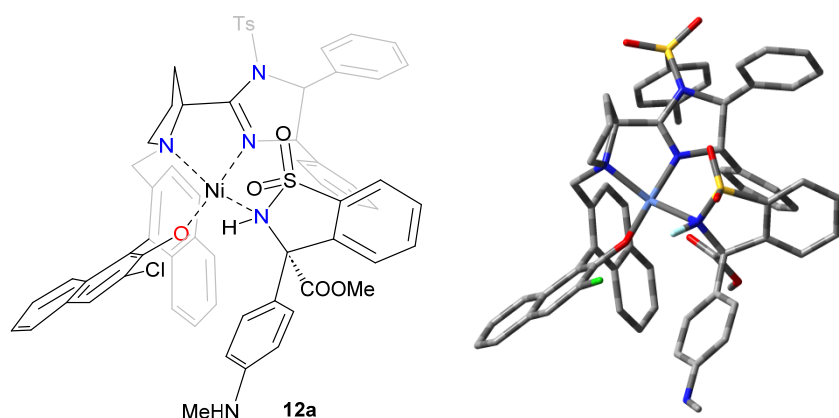

| Center Number | Atomic Number | Atomic Type | Coordinates (Angstroms) |           |           |
|---------------|---------------|-------------|-------------------------|-----------|-----------|
|               |               |             | X                       | Y         | Z         |
| 1             | 6             | 0           | 2.743055                | 13.193874 | 20.374085 |
| 2             | 1             | 0           | 2.712144                | 13.402972 | 22.498094 |
| 3             | 6             | 0           | 2.715597                | 12.715224 | 21.654456 |
| 4             | 6             | 0           | 2.755953                | 12.337289 | 19.221095 |
| 5             | 6             | 0           | 2.662443                | 11.320459 | 21.890208 |
| 6             | 8             | 0           | 2.811192                | 12.914011 | 18.044660 |
| 7             | 6             | 0           | 2.730120                | 10.951022 | 19.442460 |
| 8             | 6             | 0           | 2.596043                | 10.801133 | 23.204672 |
| 9             | 6             | 0           | 2.654539                | 10.427953 | 20.769137 |
| 10            | 6             | 0           | 2.746284                | 10.034982 | 18.272923 |
| 11            | 1             | 0           | 2.604857                | 11.502318 | 24.039322 |
| 12            | 6             | 0           | 2.512348                | 9.445391  | 23.426714 |
| 13            | 6             | 0           | 2.556529                | 9.036696  | 21.037920 |
| 14            | 6             | 0           | 3.892950                | 9.211676  | 18.020346 |
| 15            | 6             | 0           | 1.662553                | 9.976284  | 17.396454 |
| 16            | 1             | 0           | 2.457854                | 9.056578  | 24.441696 |
| 17            | 6             | 0           | 2.487652                | 8.561130  | 22.328760 |
| 18            | 1             | 0           | 2.528323                | 8.336446  | 20.204809 |
| 19            | 6             | 0           | 5.052101                | 9.253348  | 18.837719 |
| 20            | 6             | 0           | 3.897196                | 8.328289  | 16.891798 |
| 21            | 6             | 0           | 1.674043                | 9.070958  | 16.307003 |



|    |    |   |           |           |           |
|----|----|---|-----------|-----------|-----------|
| 22 | 6  | 0 | 0.483899  | 10.892591 | 17.559950 |
| 23 | 1  | 0 | 2.409797  | 7.488945  | 22.502320 |
| 24 | 1  | 0 | 5.070260  | 9.924044  | 19.694809 |
| 25 | 6  | 0 | 6.148919  | 8.467661  | 18.559856 |
| 26 | 6  | 0 | 5.043000  | 7.538398  | 16.629285 |
| 27 | 6  | 0 | 2.757951  | 8.271868  | 16.055082 |
| 28 | 1  | 0 | 0.799632  | 9.026070  | 15.657650 |
| 29 | 7  | 0 | 0.548446  | 12.063962 | 16.610434 |
| 30 | 1  | 0 | -0.471208 | 10.375490 | 17.393187 |
| 31 | 1  | 0 | 0.462634  | 11.314243 | 18.568130 |
| 32 | 1  | 0 | 7.026240  | 8.518069  | 19.202314 |
| 33 | 6  | 0 | 6.148050  | 7.601689  | 17.445465 |
| 34 | 1  | 0 | 5.027301  | 6.875269  | 15.763919 |
| 35 | 1  | 0 | 2.757069  | 7.583399  | 15.208902 |
| 36 | 6  | 0 | -0.100875 | 13.282149 | 17.216527 |
| 37 | 6  | 0 | -0.185946 | 11.816238 | 15.290954 |
| 38 | 1  | 0 | 7.022337  | 6.988979  | 17.233659 |
| 39 | 1  | 0 | 0.650152  | 13.817781 | 17.803811 |
| 40 | 1  | 0 | -0.897353 | 12.937473 | 17.890825 |
| 41 | 6  | 0 | -0.685583 | 14.031815 | 16.047015 |
| 42 | 6  | 0 | -1.270240 | 12.900580 | 15.217317 |
| 43 | 1  | 0 | -0.616098 | 10.806603 | 15.302491 |
| 44 | 6  | 0 | 0.817862  | 11.936061 | 14.193026 |
| 45 | 1  | 0 | 0.097225  | 14.564302 | 15.489633 |
| 46 | 1  | 0 | -1.437259 | 14.760264 | 16.364087 |
| 47 | 1  | 0 | -1.503814 | 13.171165 | 14.184955 |
| 48 | 1  | 0 | -2.187216 | 12.515514 | 15.678578 |
| 49 | 7  | 0 | 2.069008  | 12.089619 | 14.491265 |
| 50 | 7  | 0 | 0.532519  | 12.052097 | 12.848794 |
| 51 | 6  | 0 | 2.860025  | 12.370982 | 13.284401 |
| 52 | 16 | 0 | -0.612152 | 11.002456 | 12.058181 |
| 53 | 6  | 0 | 1.805306  | 12.318377 | 12.128301 |
| 54 | 1  | 0 | 3.231496  | 13.399725 | 13.387424 |

|    |   |   |           |           |           |
|----|---|---|-----------|-----------|-----------|
| 55 | 8 | 0 | -1.753464 | 10.936588 | 12.958875 |
| 56 | 8 | 0 | -0.700343 | 11.535736 | 10.710065 |
| 57 | 1 | 0 | 2.036679  | 11.451310 | 11.492998 |
| 58 | 6 | 0 | 4.021458  | 11.442831 | 13.058341 |
| 59 | 6 | 0 | 5.255572  | 11.977179 | 12.679961 |
| 60 | 6 | 0 | 3.866773  | 10.054934 | 13.128667 |
| 61 | 6 | 0 | 6.326372  | 11.139994 | 12.374649 |
| 62 | 1 | 0 | 5.369169  | 13.060512 | 12.617054 |
| 63 | 6 | 0 | 4.937805  | 9.217734  | 12.825376 |
| 64 | 1 | 0 | 2.902427  | 9.629356  | 13.416561 |
| 65 | 6 | 0 | 6.168034  | 9.757051  | 12.446377 |
| 66 | 1 | 0 | 7.283926  | 11.570247 | 12.083778 |
| 67 | 1 | 0 | 4.811448  | 8.136789  | 12.876238 |
| 68 | 1 | 0 | 7.001307  | 9.098692  | 12.207800 |
| 69 | 6 | 0 | 1.769601  | 13.560428 | 11.279332 |
| 70 | 6 | 0 | 2.780995  | 13.739169 | 10.329353 |
| 71 | 6 | 0 | 0.797744  | 14.548401 | 11.438197 |
| 72 | 6 | 0 | 2.818258  | 14.891025 | 9.548155  |
| 73 | 1 | 0 | 3.537608  | 12.964506 | 10.196795 |
| 74 | 6 | 0 | 0.832877  | 15.697701 | 10.652583 |
| 75 | 1 | 0 | 0.008659  | 14.417347 | 12.177095 |
| 76 | 6 | 0 | 1.840785  | 15.872775 | 9.706613  |
| 77 | 1 | 0 | 3.605591  | 15.016077 | 8.806693  |
| 78 | 1 | 0 | 0.065691  | 16.459242 | 10.780132 |
| 79 | 1 | 0 | 1.861685  | 16.769842 | 9.090515  |
| 80 | 6 | 0 | 0.204489  | 9.439887  | 12.024903 |
| 81 | 6 | 0 | 0.064088  | 8.577697  | 13.115038 |
| 82 | 6 | 0 | 1.034826  | 9.121031  | 10.949482 |
| 83 | 6 | 0 | 0.782982  | 7.391153  | 13.127050 |
| 84 | 1 | 0 | -0.614145 | 8.829017  | 13.929189 |
| 85 | 6 | 0 | 1.747336  | 7.928245  | 10.983886 |
| 86 | 1 | 0 | 1.110192  | 9.792208  | 10.096498 |
| 87 | 6 | 0 | 1.643098  | 7.051734  | 12.070854 |

|     |    |   |          |           |           |
|-----|----|---|----------|-----------|-----------|
| 88  | 1  | 0 | 0.673303 | 6.707953  | 13.968895 |
| 89  | 1  | 0 | 2.400072 | 7.672156  | 10.150770 |
| 90  | 6  | 0 | 2.415473 | 5.772733  | 12.107592 |
| 91  | 1  | 0 | 2.888939 | 5.617825  | 13.085226 |
| 92  | 1  | 0 | 1.755799 | 4.911080  | 11.940670 |
| 93  | 1  | 0 | 3.194126 | 5.746538  | 11.338297 |
| 94  | 17 | 0 | 2.751332 | 14.923457 | 20.098815 |
| 95  | 28 | 0 | 2.472789 | 12.321335 | 16.301326 |
| 96  | 6  | 0 | 5.642273 | 14.968105 | 14.770180 |
| 97  | 6  | 0 | 4.665392 | 15.686998 | 14.092383 |
| 98  | 6  | 0 | 4.869123 | 16.264472 | 12.844850 |
| 99  | 6  | 0 | 6.128014 | 16.119382 | 12.270874 |
| 100 | 6  | 0 | 7.139778 | 15.437742 | 12.953578 |
| 101 | 6  | 0 | 6.908551 | 14.855658 | 14.198420 |
| 102 | 6  | 0 | 5.161305 | 14.345865 | 16.077055 |
| 103 | 1  | 0 | 4.069782 | 16.802692 | 12.339420 |
| 104 | 1  | 0 | 6.325978 | 16.548758 | 11.291394 |
| 105 | 1  | 0 | 8.125648 | 15.349723 | 12.502246 |
| 106 | 1  | 0 | 7.702427 | 14.319263 | 14.711698 |
| 107 | 16 | 0 | 3.193046 | 15.821765 | 15.048551 |
| 108 | 8  | 0 | 2.024289 | 15.356665 | 14.300126 |
| 109 | 8  | 0 | 3.089118 | 17.119356 | 15.717734 |
| 110 | 6  | 0 | 5.313488 | 12.818401 | 15.981960 |
| 111 | 8  | 0 | 4.387042 | 12.008668 | 16.024404 |
| 112 | 8  | 0 | 6.560383 | 12.434497 | 15.864054 |
| 113 | 6  | 0 | 6.795331 | 11.004225 | 15.835780 |
| 114 | 1  | 0 | 6.154913 | 10.532137 | 15.087498 |
| 115 | 1  | 0 | 7.848400 | 10.895407 | 15.578257 |
| 116 | 1  | 0 | 6.593290 | 10.592882 | 16.829436 |
| 117 | 7  | 0 | 3.702967 | 14.619795 | 16.120345 |
| 118 | 6  | 0 | 5.959529 | 14.026884 | 18.463789 |
| 119 | 6  | 0 | 6.336380 | 16.154585 | 17.413327 |
| 120 | 6  | 0 | 6.500186 | 14.503984 | 19.643283 |

|     |   |   |          |           |           |
|-----|---|---|----------|-----------|-----------|
| 121 | 1 | 0 | 5.582195 | 13.001938 | 18.442540 |
| 122 | 6 | 0 | 6.871404 | 16.649715 | 18.594357 |
| 123 | 1 | 0 | 6.274903 | 16.814579 | 16.547836 |
| 124 | 6 | 0 | 6.967868 | 15.831031 | 19.737045 |
| 125 | 1 | 0 | 6.548942 | 13.857492 | 20.519384 |
| 126 | 1 | 0 | 7.217360 | 17.679860 | 18.631534 |
| 127 | 7 | 0 | 7.530846 | 16.280750 | 20.905217 |
| 128 | 1 | 0 | 7.316315 | 15.727598 | 21.724226 |
| 129 | 6 | 0 | 7.758190 | 17.685062 | 21.146974 |
| 130 | 1 | 0 | 6.845473 | 18.293108 | 21.040146 |
| 131 | 1 | 0 | 8.140996 | 17.807554 | 22.162833 |
| 132 | 1 | 0 | 8.511140 | 18.083702 | 20.455706 |
| 133 | 6 | 0 | 5.872772 | 14.840085 | 17.323461 |
| 134 | 1 | 0 | 3.362748 | 14.783973 | 17.071002 |

Number of imaginary frequency: 0

Energies:

|                                              |              |
|----------------------------------------------|--------------|
| Sum of electronic and zero-point Energies=   | -4659.297208 |
| Sum of electronic and thermal Energies=      | -4659.230911 |
| Sum of electronic and thermal Enthalpies=    | -4659.229967 |
| Sum of electronic and thermal Free Energies= | -4659.394419 |

Optimized Structure of **12b**

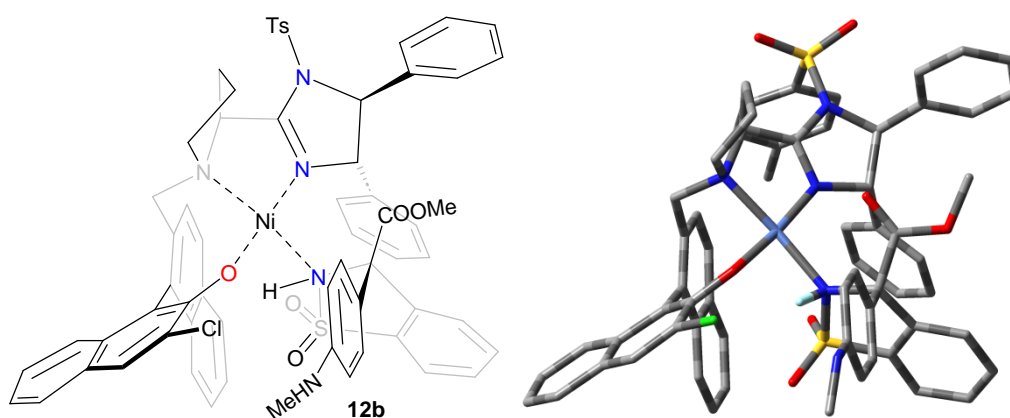

| Center | Atomic | Atomic | Coordinates (Angstroms) |
|--------|--------|--------|-------------------------|
|--------|--------|--------|-------------------------|

| Number | Number | Type | X         | Y         | Z         |
|--------|--------|------|-----------|-----------|-----------|
| 1      | 6      | 0    | 2.773577  | 13.595394 | 20.212182 |
| 2      | 1      | 0    | 3.161299  | 13.752432 | 22.303962 |
| 3      | 6      | 0    | 3.024322  | 13.085811 | 21.454535 |
| 4      | 6      | 0    | 2.588847  | 12.773709 | 19.047303 |
| 5      | 6      | 0    | 3.101096  | 11.686277 | 21.641325 |
| 6      | 8      | 0    | 2.295949  | 13.414853 | 17.933746 |
| 7      | 6      | 0    | 2.742194  | 11.387024 | 19.201869 |
| 8      | 6      | 0    | 3.323963  | 11.133361 | 22.924769 |
| 9      | 6      | 0    | 2.949072  | 10.827472 | 20.505995 |
| 10     | 6      | 0    | 2.703178  | 10.483299 | 18.023415 |
| 11     | 1      | 0    | 3.444610  | 11.815417 | 23.766401 |
| 12     | 6      | 0    | 3.382158  | 9.771177  | 23.108601 |
| 13     | 6      | 0    | 2.992852  | 9.427164  | 20.740992 |
| 14     | 6      | 0    | 3.862494  | 9.701600  | 17.696117 |
| 15     | 6      | 0    | 1.550849  | 10.337958 | 17.252452 |
| 16     | 1      | 0    | 3.553249  | 9.354732  | 24.099375 |
| 17     | 6      | 0    | 3.203105  | 8.915864  | 22.002800 |
| 18     | 1      | 0    | 2.846727  | 8.741891  | 19.909074 |
| 19     | 6      | 0    | 5.101534  | 9.861231  | 18.367610 |
| 20     | 6      | 0    | 3.798786  | 8.751346  | 16.627755 |
| 21     | 6      | 0    | 1.498994  | 9.369750  | 16.220448 |
| 22     | 6      | 0    | 0.351298  | 11.202613 | 17.491398 |
| 23     | 1      | 0    | 3.226777  | 7.836656  | 22.145882 |
| 24     | 1      | 0    | 5.184153  | 10.605793 | 19.155305 |
| 25     | 6      | 0    | 6.206237  | 9.121542  | 18.012484 |
| 26     | 6      | 0    | 4.948330  | 7.994433  | 16.294726 |
| 27     | 6      | 0    | 2.586097  | 8.591116  | 15.919346 |
| 28     | 1      | 0    | 0.563067  | 9.231495  | 15.678693 |
| 29     | 7      | 0    | 0.257864  | 12.328362 | 16.500418 |
| 30     | 1      | 0    | -0.587504 | 10.633112 | 17.434077 |
| 31     | 1      | 0    | 0.396475  | 11.666784 | 18.479632 |
| 32     | 1      | 0    | 7.148716  | 9.275341  | 18.535467 |

|    |    |   |           |           |           |
|----|----|---|-----------|-----------|-----------|
| 33 | 6  | 0 | 6.131352  | 8.172928  | 16.970937 |
| 34 | 1  | 0 | 4.873657  | 7.269283  | 15.483542 |
| 35 | 1  | 0 | 2.531019  | 7.843279  | 15.127235 |
| 36 | 6  | 0 | -0.527243 | 13.477356 | 17.081930 |
| 37 | 6  | 0 | -0.466663 | 11.946406 | 15.223005 |
| 38 | 1  | 0 | 7.010786  | 7.590017  | 16.702853 |
| 39 | 1  | 0 | 0.150149  | 14.104862 | 17.665887 |
| 40 | 1  | 0 | -1.284486 | 13.053711 | 17.757030 |
| 41 | 6  | 0 | -1.185741 | 14.128460 | 15.893870 |
| 42 | 6  | 0 | -1.658460 | 12.916062 | 15.112646 |
| 43 | 1  | 0 | -0.805287 | 10.905939 | 15.285197 |
| 44 | 6  | 0 | 0.486594  | 12.107933 | 14.093383 |
| 45 | 1  | 0 | -0.455352 | 14.711776 | 15.316113 |
| 46 | 1  | 0 | -2.002727 | 14.792956 | 16.189152 |
| 47 | 1  | 0 | -1.923147 | 13.120694 | 14.072816 |
| 48 | 1  | 0 | -2.529617 | 12.459352 | 15.596166 |
| 49 | 7  | 0 | 1.703152  | 12.519345 | 14.300642 |
| 50 | 7  | 0 | 0.135563  | 11.983750 | 12.770419 |
| 51 | 6  | 0 | 2.399064  | 12.670384 | 13.003276 |
| 52 | 16 | 0 | -0.989235 | 10.823572 | 12.123906 |
| 53 | 6  | 0 | 1.299303  | 12.346861 | 11.936239 |
| 54 | 1  | 0 | 2.687577  | 13.720627 | 12.896272 |
| 55 | 8  | 0 | -2.049847 | 10.716683 | 13.114422 |
| 56 | 8  | 0 | -1.223741 | 11.297516 | 10.771056 |
| 57 | 1  | 0 | 1.620619  | 11.459848 | 11.373437 |
| 58 | 6  | 0 | 3.614676  | 11.804927 | 12.829278 |
| 59 | 6  | 0 | 4.808747  | 12.370597 | 12.382520 |
| 60 | 6  | 0 | 3.527317  | 10.418869 | 12.989852 |
| 61 | 6  | 0 | 5.912099  | 11.562121 | 12.113430 |
| 62 | 1  | 0 | 4.868533  | 13.451519 | 12.233804 |
| 63 | 6  | 0 | 4.627714  | 9.611970  | 12.724831 |
| 64 | 1  | 0 | 2.585687  | 9.974006  | 13.319667 |
| 65 | 6  | 0 | 5.824417  | 10.183671 | 12.289738 |

|    |    |   |           |           |           |
|----|----|---|-----------|-----------|-----------|
| 66 | 1  | 0 | 6.838967  | 12.009753 | 11.758525 |
| 67 | 1  | 0 | 4.552698  | 8.531868  | 12.847584 |
| 68 | 1  | 0 | 6.684528  | 9.551690  | 12.076136 |
| 69 | 6  | 0 | 1.032440  | 13.471514 | 10.976549 |
| 70 | 6  | 0 | 1.884988  | 13.598939 | 9.875622  |
| 71 | 6  | 0 | 0.029052  | 14.420771 | 11.182246 |
| 72 | 6  | 0 | 1.740915  | 14.663845 | 8.991843  |
| 73 | 1  | 0 | 2.662705  | 12.852352 | 9.710552  |
| 74 | 6  | 0 | -0.122938 | 15.479088 | 10.288324 |
| 75 | 1  | 0 | -0.638333 | 14.325314 | 12.039044 |
| 76 | 6  | 0 | 0.734296  | 15.606618 | 9.196393  |
| 77 | 1  | 0 | 2.408539  | 14.751222 | 8.136649  |
| 78 | 1  | 0 | -0.913225 | 16.210433 | 10.448375 |
| 79 | 1  | 0 | 0.612542  | 16.434583 | 8.500403  |
| 80 | 6  | 0 | -0.073248 | 9.320633  | 12.071101 |
| 81 | 6  | 0 | -0.148971 | 8.444641  | 13.156169 |
| 82 | 6  | 0 | 0.766450  | 9.061589  | 10.985949 |
| 83 | 6  | 0 | 0.652184  | 7.311820  | 13.159861 |
| 84 | 1  | 0 | -0.841876 | 8.641097  | 13.972126 |
| 85 | 6  | 0 | 1.569229  | 7.927234  | 11.017563 |
| 86 | 1  | 0 | 0.782538  | 9.731573  | 10.128661 |
| 87 | 6  | 0 | 1.538902  | 7.046134  | 12.105170 |
| 88 | 1  | 0 | 0.594210  | 6.619534  | 13.999445 |
| 89 | 1  | 0 | 2.237314  | 7.722217  | 10.182547 |
| 90 | 6  | 0 | 2.423617  | 5.842170  | 12.144313 |
| 91 | 1  | 0 | 2.939204  | 5.755902  | 13.109342 |
| 92 | 1  | 0 | 1.843000  | 4.918770  | 12.019356 |
| 93 | 1  | 0 | 3.179319  | 5.868979  | 11.352589 |
| 94 | 17 | 0 | 2.697726  | 15.329339 | 19.993845 |
| 95 | 28 | 0 | 2.087172  | 12.991786 | 16.111810 |
| 96 | 6  | 0 | 5.587782  | 15.132622 | 14.711255 |
| 97 | 6  | 0 | 6.215929  | 13.949801 | 15.076164 |
| 98 | 6  | 0 | 7.489662  | 13.585037 | 14.649818 |

|     |    |   |          |           |           |
|-----|----|---|----------|-----------|-----------|
| 99  | 6  | 0 | 8.163560 | 14.469471 | 13.818664 |
| 100 | 6  | 0 | 7.566438 | 15.679872 | 13.454323 |
| 101 | 6  | 0 | 6.293203 | 16.022502 | 13.897926 |
| 102 | 6  | 0 | 4.218484 | 15.372018 | 15.326552 |
| 103 | 1  | 0 | 7.933872 | 12.640345 | 14.956189 |
| 104 | 1  | 0 | 9.160355 | 14.222639 | 13.460934 |
| 105 | 1  | 0 | 8.108829 | 16.374872 | 12.816950 |
| 106 | 1  | 0 | 5.854804 | 16.975308 | 13.616671 |
| 107 | 16 | 0 | 5.245533 | 12.994504 | 16.181218 |
| 108 | 8  | 0 | 5.737636 | 13.076467 | 17.553987 |
| 109 | 8  | 0 | 4.884018 | 11.704098 | 15.617997 |
| 110 | 6  | 0 | 3.105310 | 15.645353 | 14.308667 |
| 111 | 8  | 0 | 1.940795 | 15.356682 | 14.503268 |
| 112 | 8  | 0 | 3.562451 | 16.293025 | 13.242815 |
| 113 | 6  | 0 | 2.592288 | 16.636016 | 12.233711 |
| 114 | 1  | 0 | 1.683509 | 17.035651 | 12.690036 |
| 115 | 1  | 0 | 3.076885 | 17.385688 | 11.607714 |
| 116 | 1  | 0 | 2.361583 | 15.742458 | 11.645664 |
| 117 | 7  | 0 | 3.849846 | 14.080663 | 16.065223 |
| 118 | 6  | 0 | 3.070212 | 17.234914 | 16.656364 |
| 119 | 6  | 0 | 5.405390 | 16.826063 | 17.042736 |
| 120 | 6  | 0 | 3.080286 | 18.221824 | 17.623933 |
| 121 | 1  | 0 | 2.130893 | 17.016951 | 16.151496 |
| 122 | 6  | 0 | 5.423059 | 17.801124 | 18.027594 |
| 123 | 1  | 0 | 6.329738 | 16.288664 | 16.834744 |
| 124 | 6  | 0 | 4.257449 | 18.530590 | 18.336534 |
| 125 | 1  | 0 | 2.164241 | 18.766495 | 17.851567 |
| 126 | 1  | 0 | 6.348551 | 18.000649 | 18.562648 |
| 127 | 7  | 0 | 4.250109 | 19.525032 | 19.276197 |
| 128 | 1  | 0 | 3.334785 | 19.818916 | 19.590519 |
| 129 | 6  | 0 | 5.326262 | 19.697964 | 20.221638 |
| 130 | 1  | 0 | 6.256330 | 19.971191 | 19.707932 |
| 131 | 1  | 0 | 5.067168 | 20.513680 | 20.900170 |



|     |   |   |          |           |           |
|-----|---|---|----------|-----------|-----------|
| 132 | 1 | 0 | 5.520105 | 18.792476 | 20.818677 |
| 133 | 6 | 0 | 4.236716 | 16.522338 | 16.330711 |
| 134 | 1 | 0 | 3.683277 | 14.348267 | 17.046689 |

Number of imaginary frequency: 0

Energies:

|                                              |              |
|----------------------------------------------|--------------|
| Sum of electronic and zero-point Energies=   | -4659.278604 |
| Sum of electronic and thermal Energies=      | -4659.211930 |
| Sum of electronic and thermal Enthalpies=    | -4659.210986 |
| Sum of electronic and thermal Free Energies= | -4659.377757 |

## 5. Copies of NMR Spectra of the Products and Ligands.

### 3aa $^1\text{H}$ NMR (400 MHz, $\text{CDCl}_3$ )

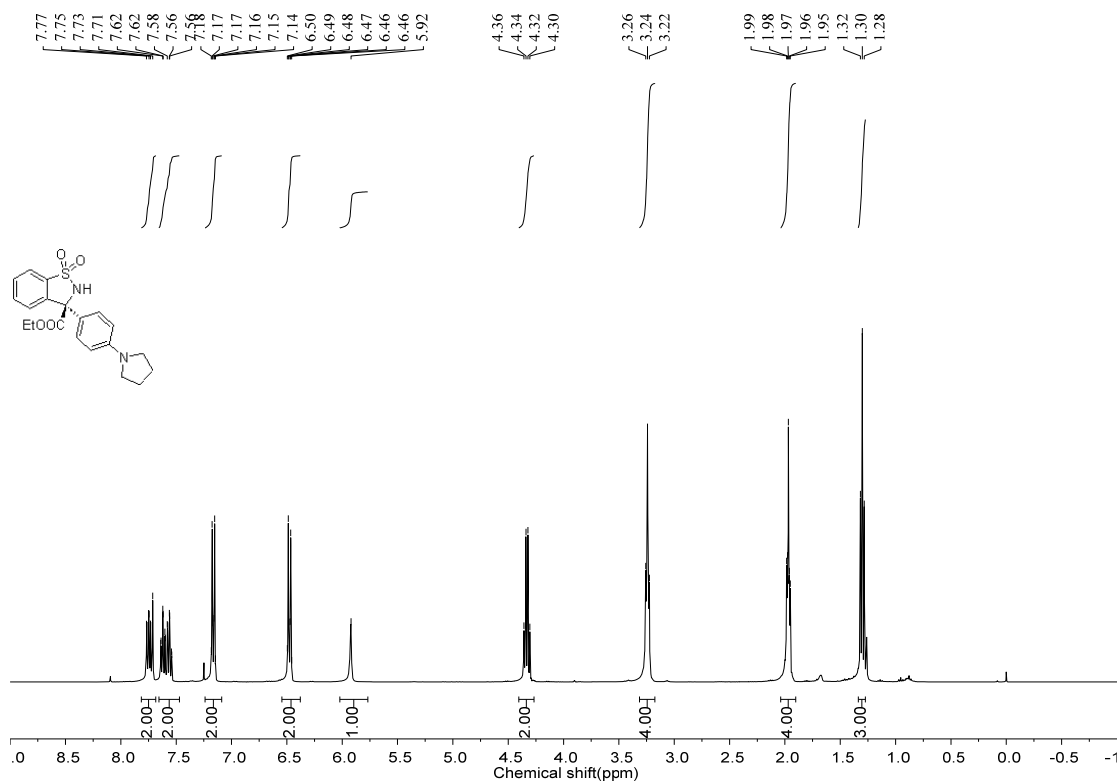

### 3aa $^{13}\text{C}$ $\{^1\text{H}\}$ NMR (100 MHz, $\text{CDCl}_3$ )

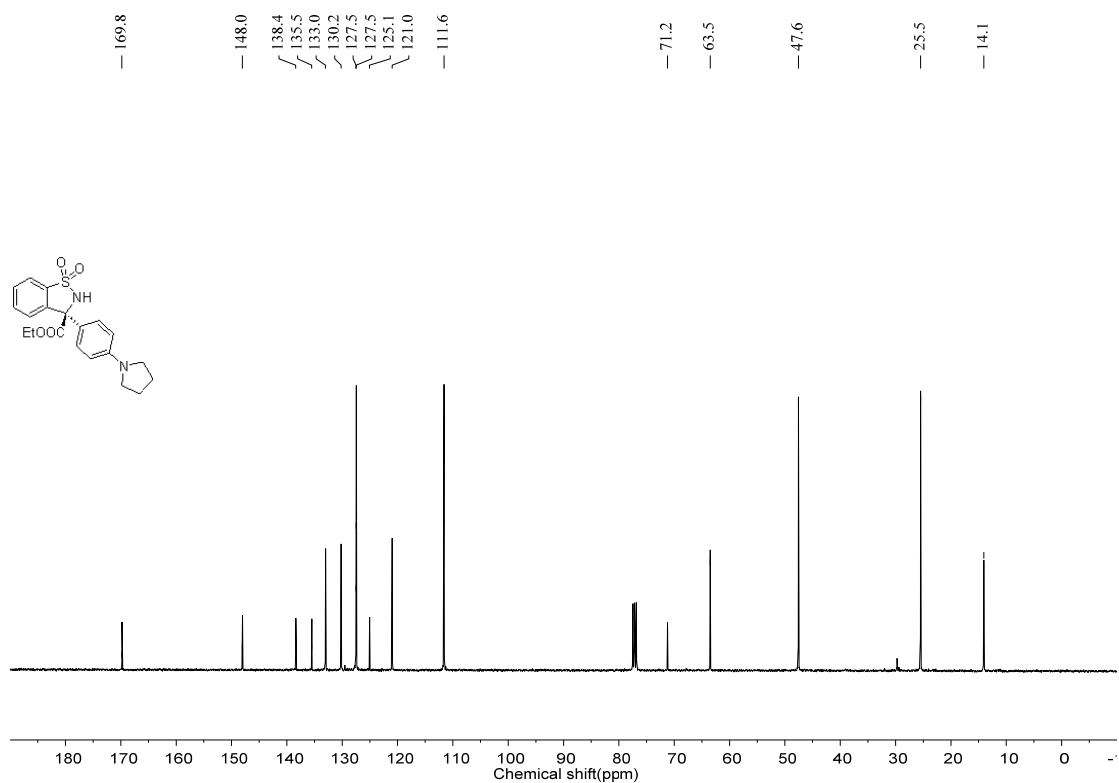

**3ab**  $^1\text{H}$  NMR (400 MHz,  $\text{CDCl}_3$ )

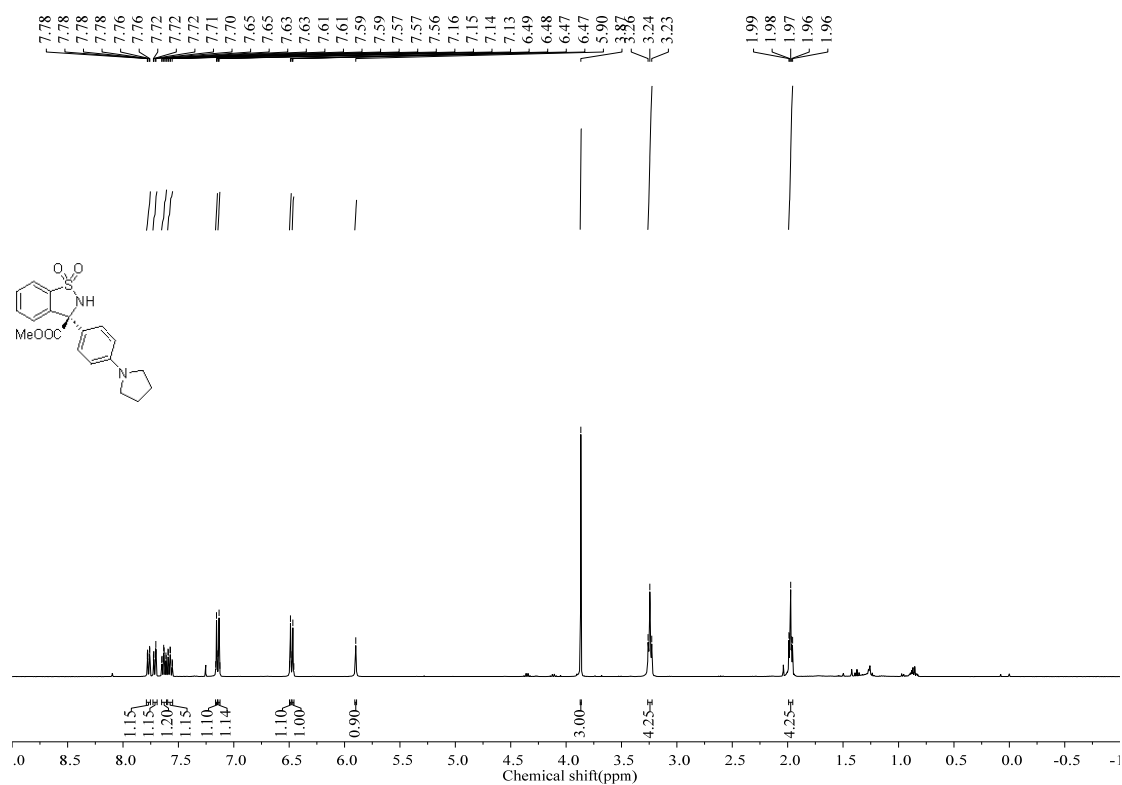

**3ab**  $^{13}\text{C}$   $\{^1\text{H}\}$  NMR (100 MHz,  $\text{CDCl}_3$ )

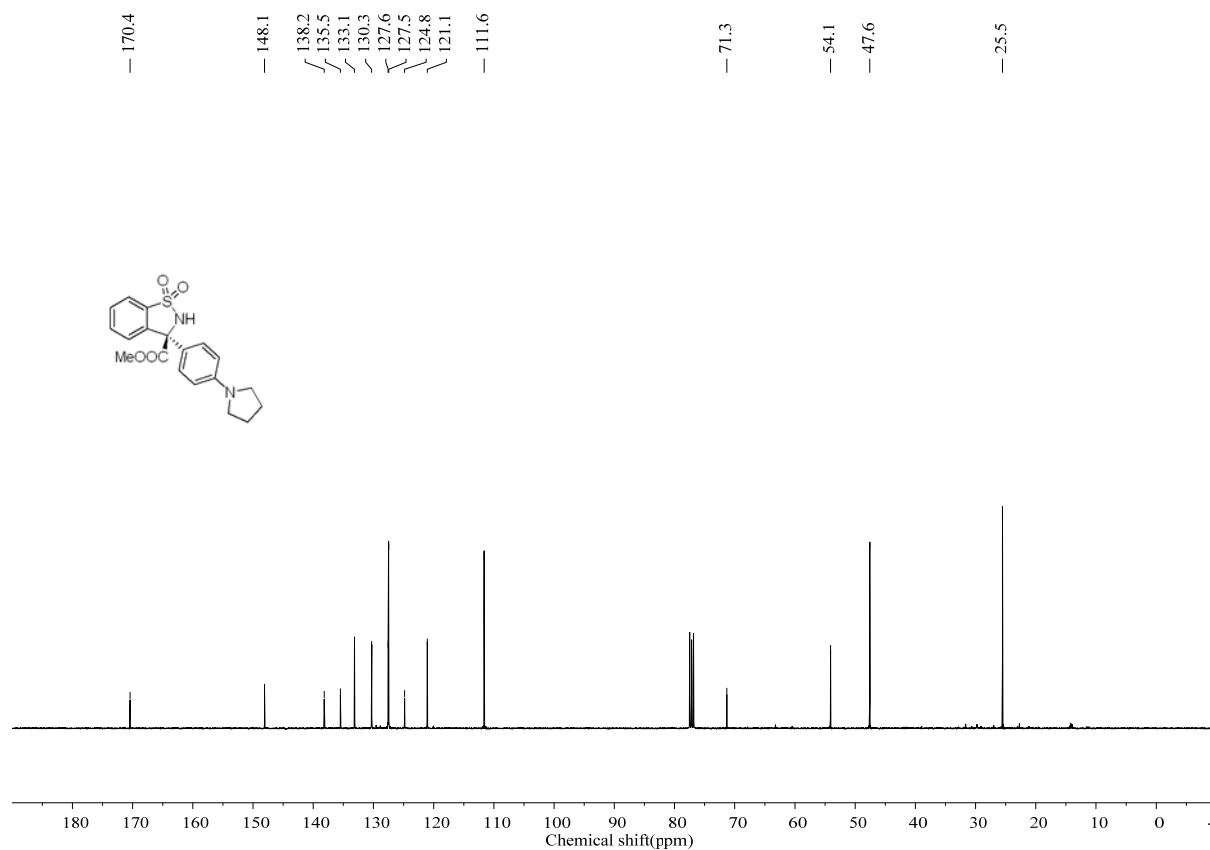

**3ac**  $^1\text{H}$  NMR (400 MHz,  $\text{CDCl}_3$ )

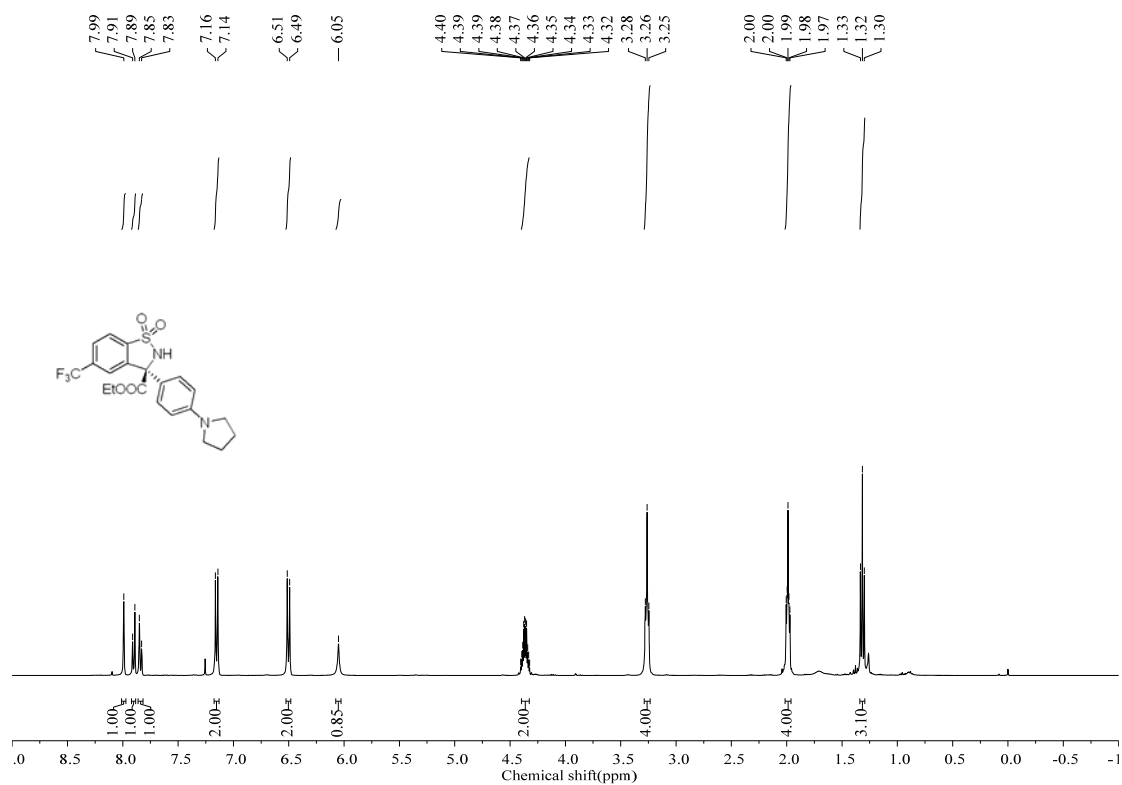

**3ac**  $^{13}\text{C}$   $\{^1\text{H}\}$  NMR (100 MHz,  $\text{CDCl}_3$ )

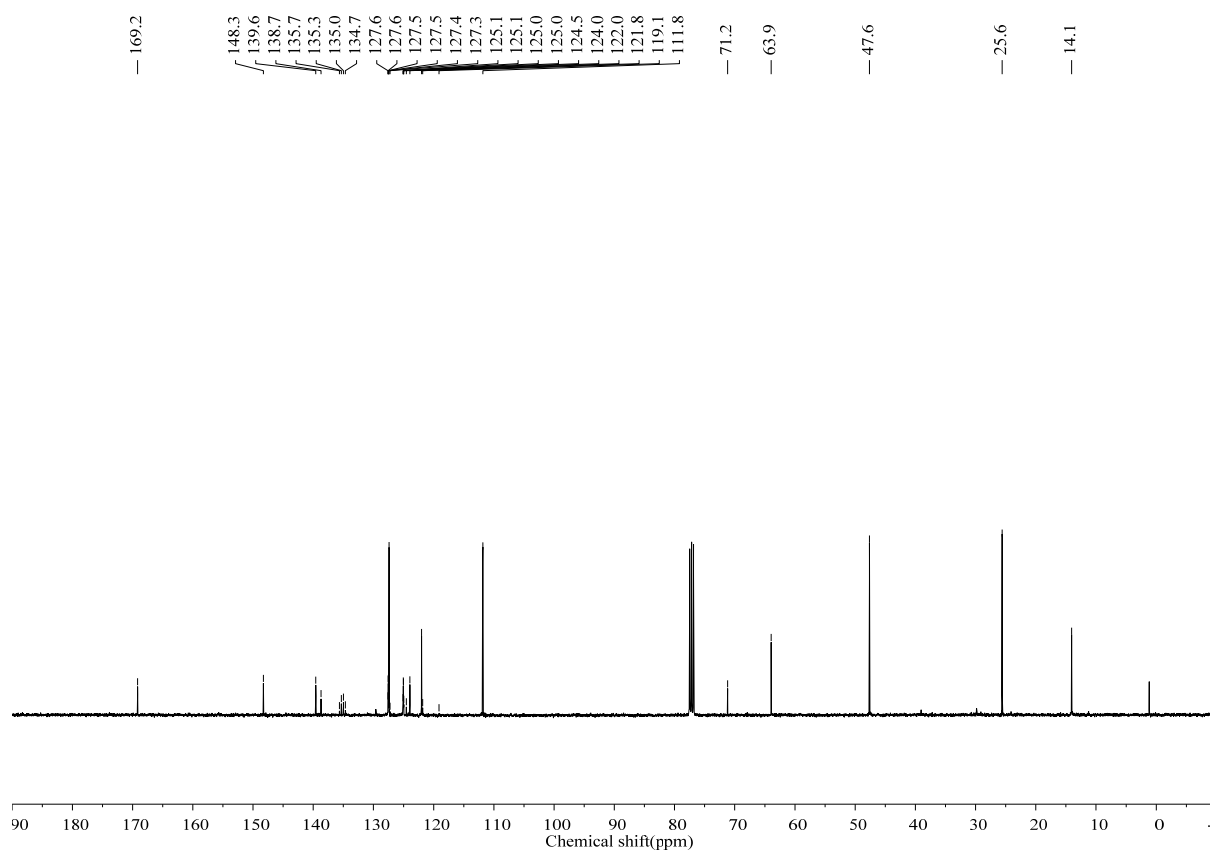

**3ac**  $^{19}\text{F}$  NMR ( $\text{CDCl}_3$ )

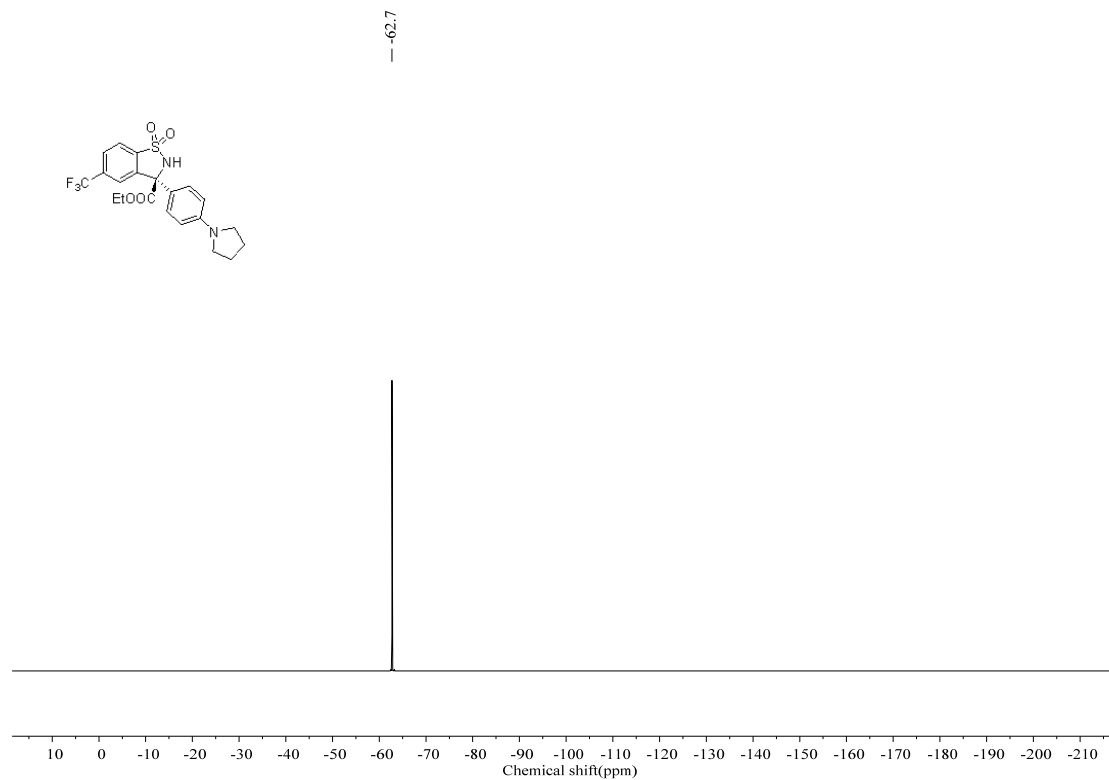

**3ad**  $^1\text{H}$  NMR (400 MHz,  $\text{CDCl}_3$ )

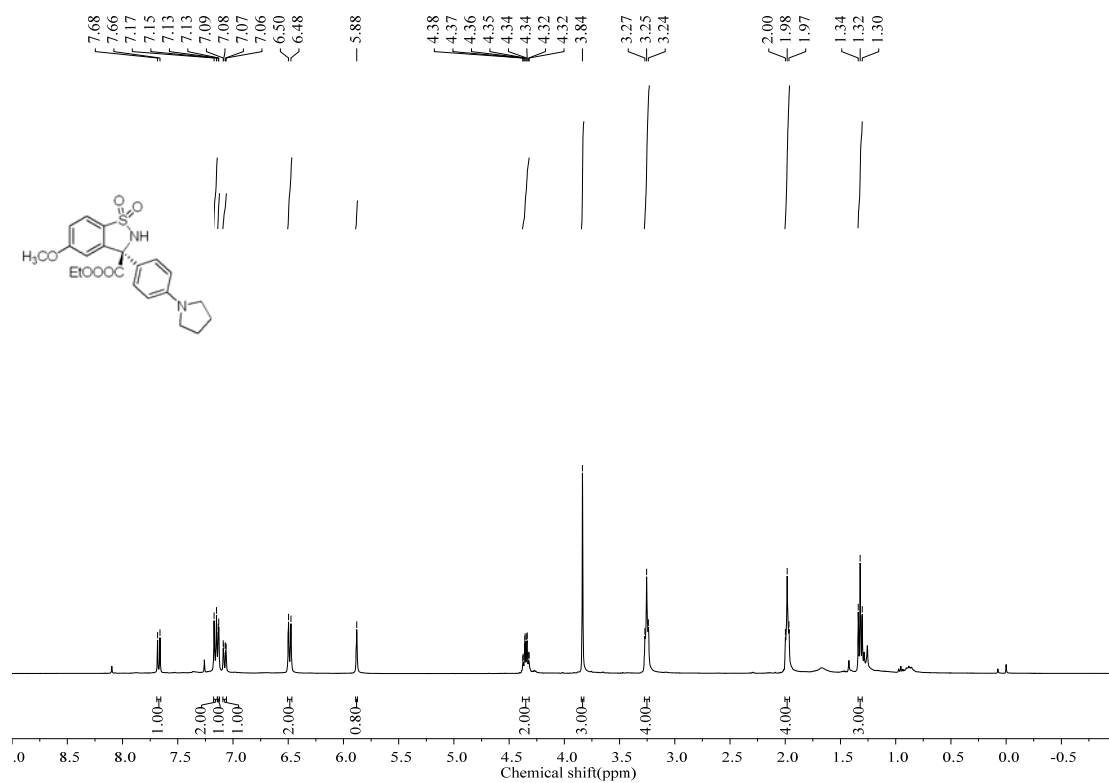

**3ad**  $^{13}\text{C}$   $\{^1\text{H}\}$  NMR (100 MHz,  $\text{CDCl}_3$ )

$\delta$  169.8  
 $\delta$  163.5  
 $\delta$  148.0  
 $\delta$  141.0  
 $\delta$  127.8  
 $\delta$  127.5  
 $\delta$  125.2  
 $\delta$  122.5  
 $\delta$  117.2  
 $\delta$  111.7  
 $\delta$  111.6  
 $\delta$  71.0  
 $\delta$  63.5  
 $\delta$  56.0  
 $\delta$  47.6  
 $\delta$  25.6  
 $\delta$  14.2

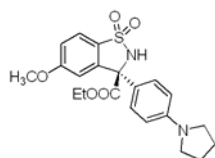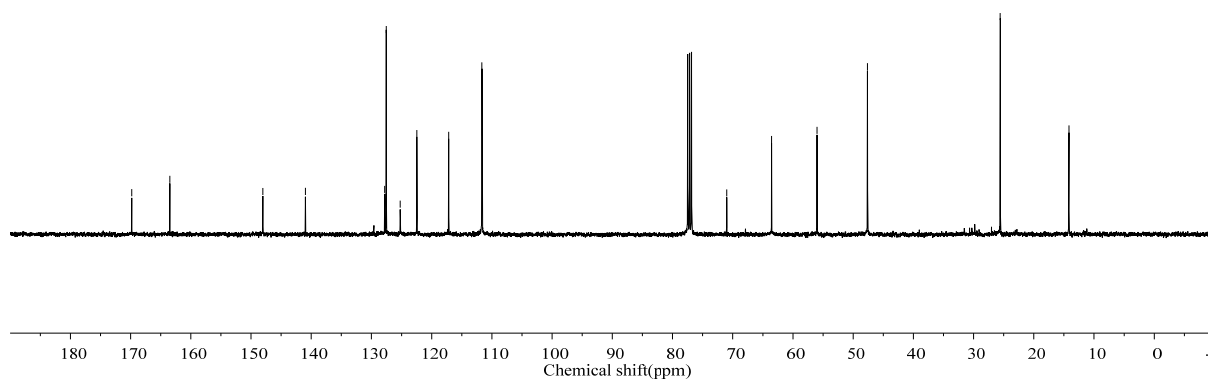

**3ae**  $^1\text{H}$  NMR (400 MHz,  $\text{CDCl}_3$ )

$\delta$  7.58  
 $\delta$  7.57  
 $\delta$  7.36  
 $\delta$  7.31  
 $\delta$  7.09  
 $\delta$  7.07  
 $\delta$  6.40  
 $\delta$  6.38  
 $\delta$  5.99  
 $\delta$  4.28  
 $\delta$  4.27  
 $\delta$  4.25  
 $\delta$  4.23  
 $\delta$  3.17  
 $\delta$  3.15  
 $\delta$  3.14  
 $\delta$  1.90  
 $\delta$  1.88  
 $\delta$  1.87  
 $\delta$  1.24  
 $\delta$  1.22  
 $\delta$  1.21

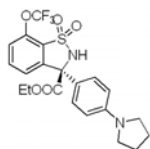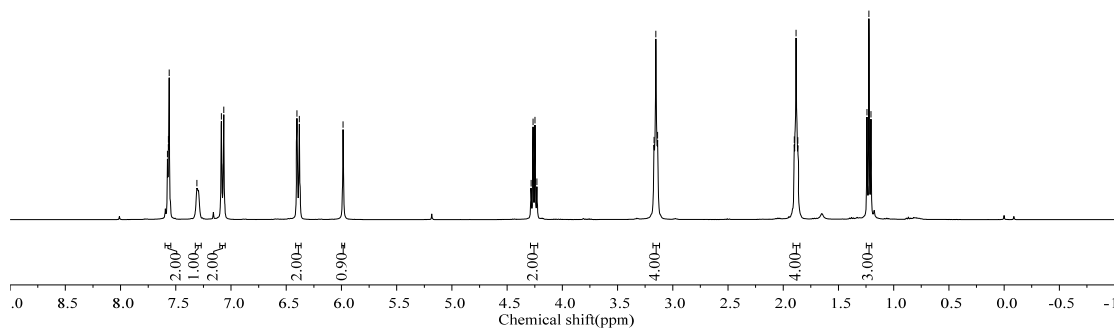

**3ae**  $^{13}\text{C}$   $\{^1\text{H}\}$  NMR (100 MHz,  $\text{CDCl}_3$ )

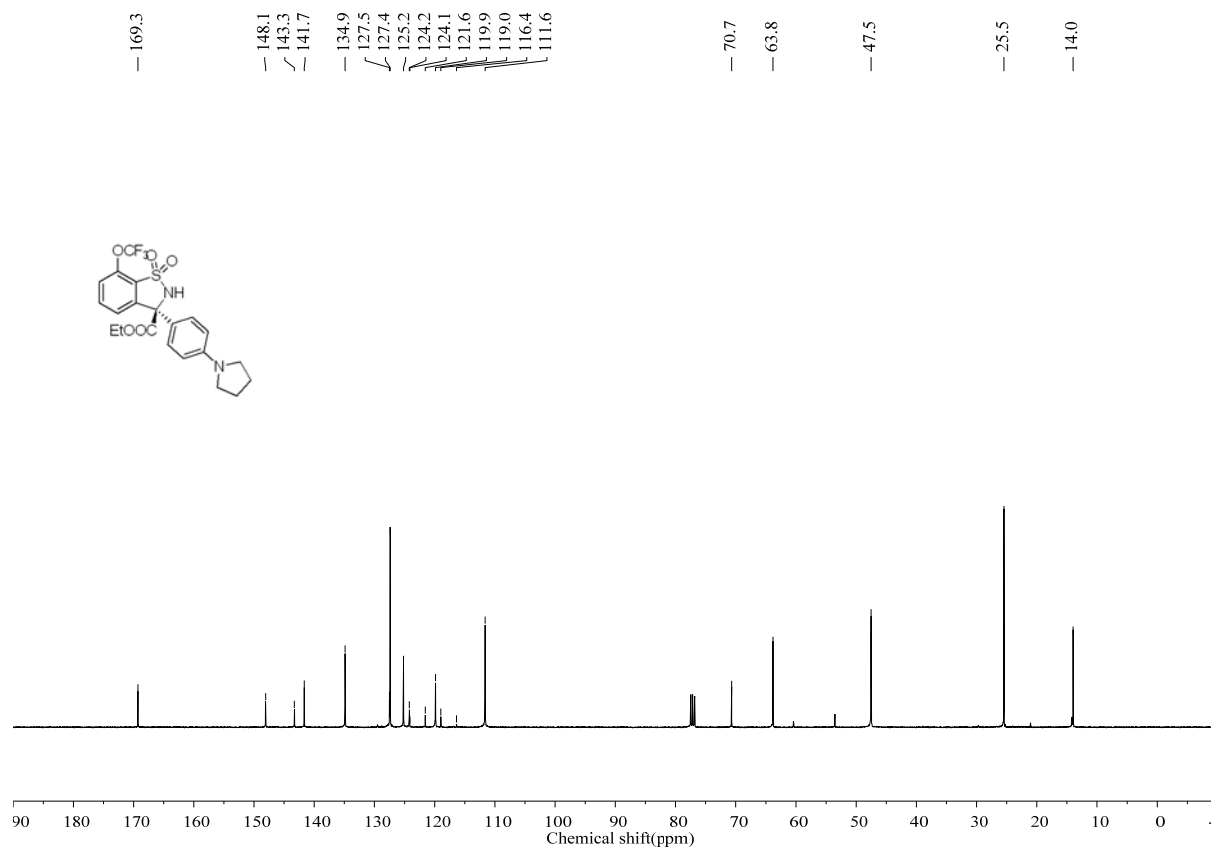

**3ae**  $^{19}\text{F}$  NMR ( $\text{CDCl}_3$ )

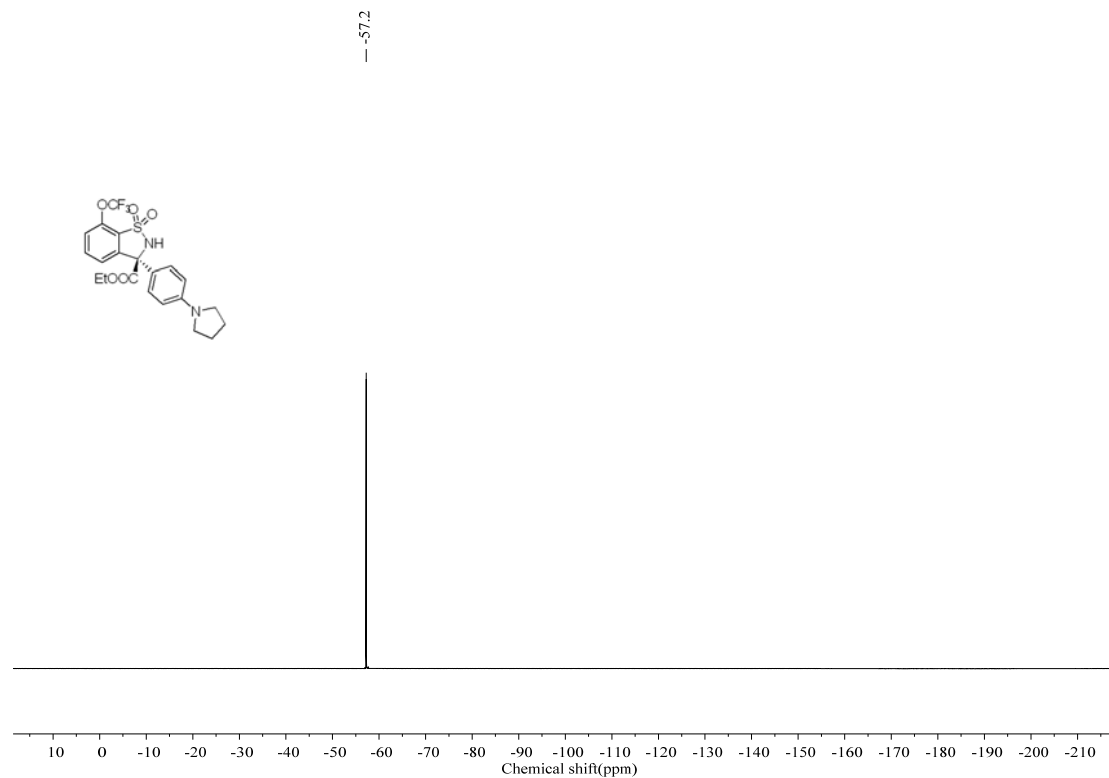

**3af**  $^1\text{H}$  NMR (400 MHz,  $\text{CDCl}_3$ )

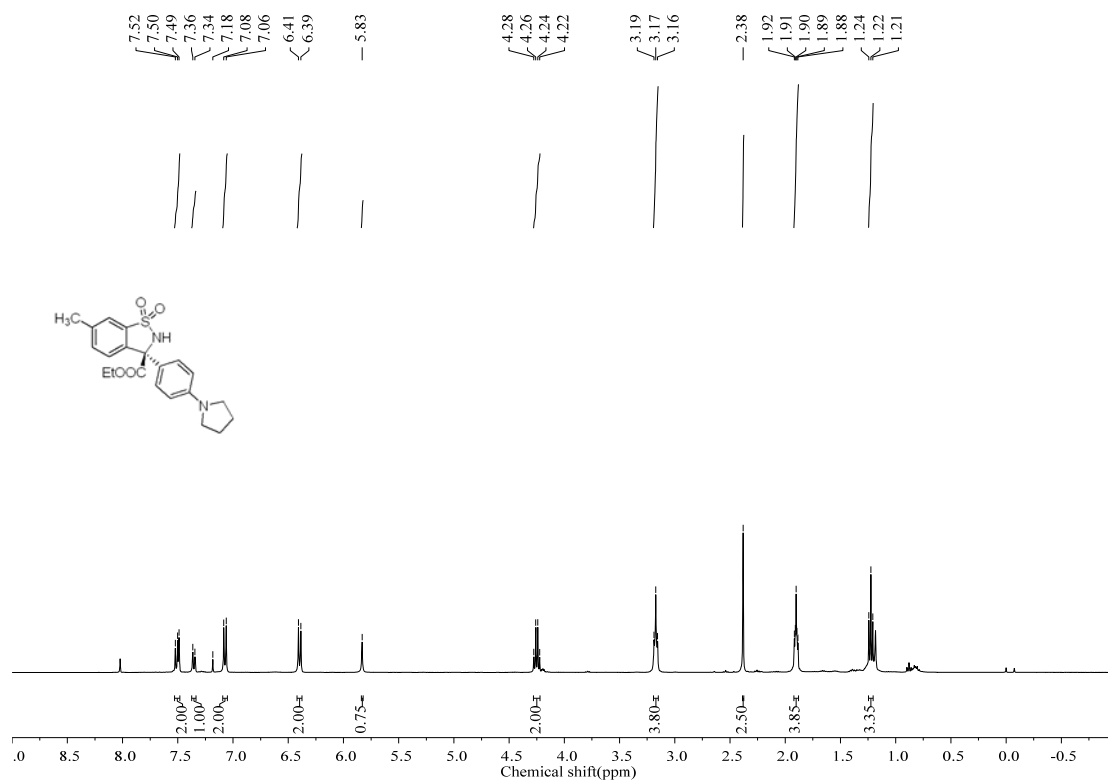

**3af**  $^{13}\text{C}$   $\{^1\text{H}\}$  NMR (100 MHz,  $\text{CDCl}_3$ )

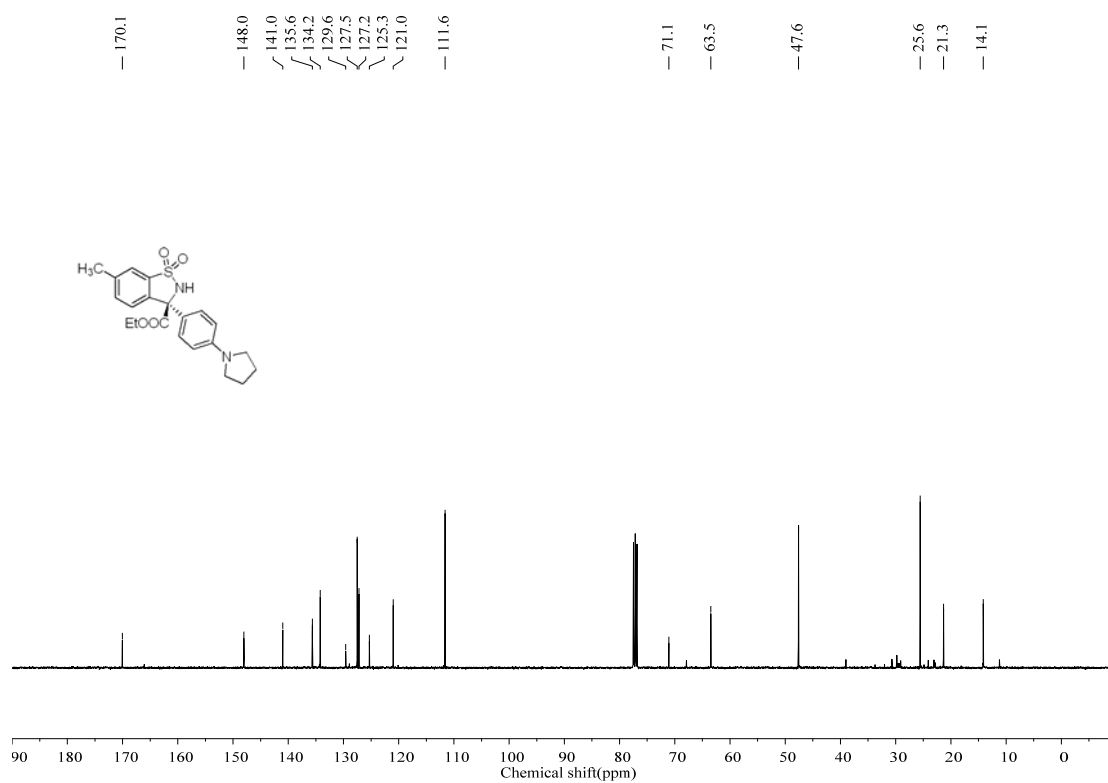



**3ag**  $^1\text{H}$  NMR (400 MHz,  $\text{CDCl}_3$ )

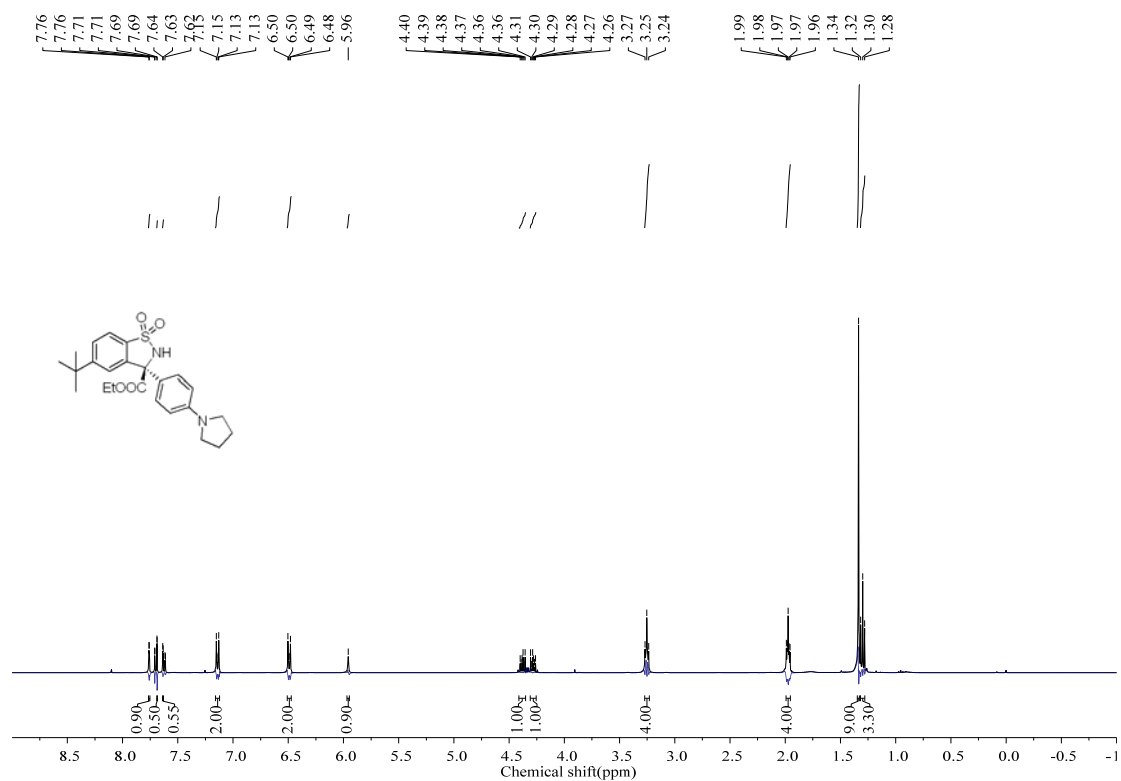

**3ag**  $^{13}\text{C}$   $\{^1\text{H}\}$  NMR (100 MHz,  $\text{CDCl}_3$ )

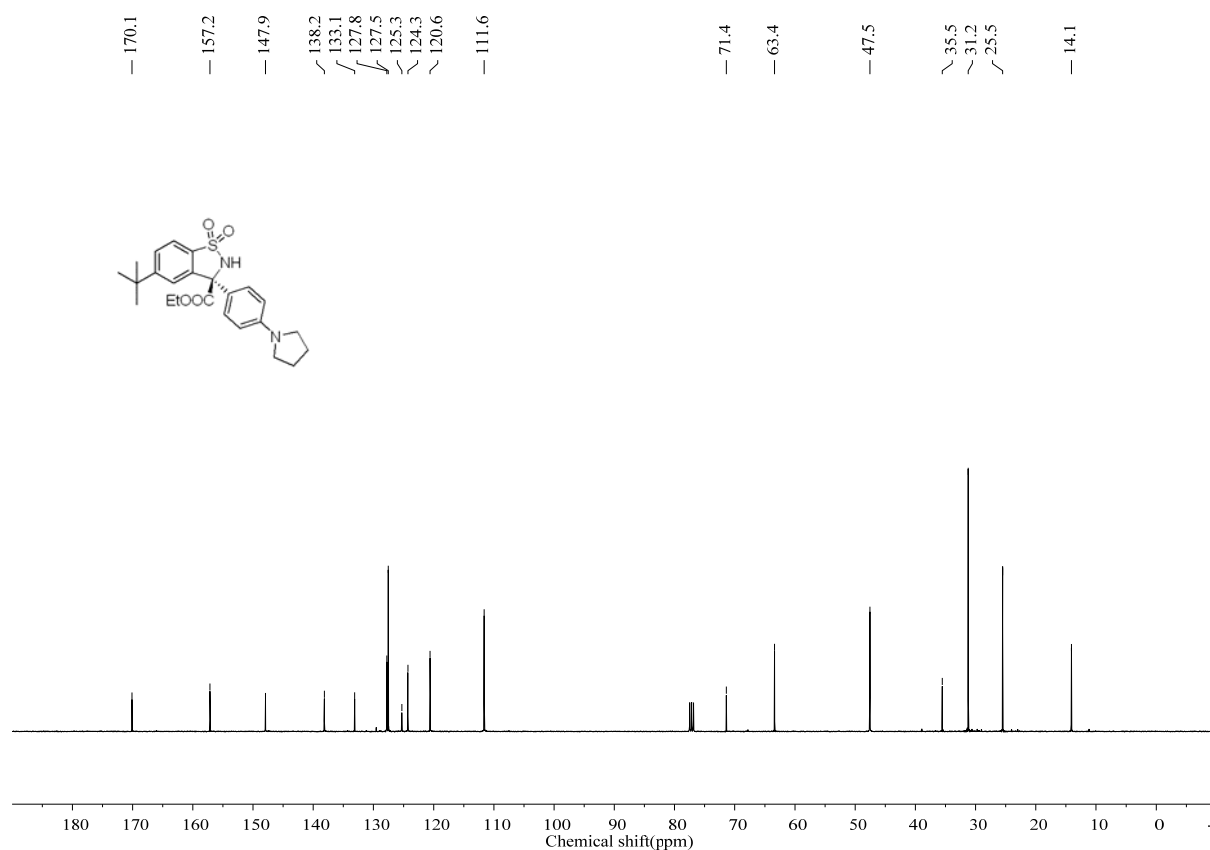

**3ah**  $^1\text{H}$  NMR (400 MHz,  $\text{CDCl}_3$ )

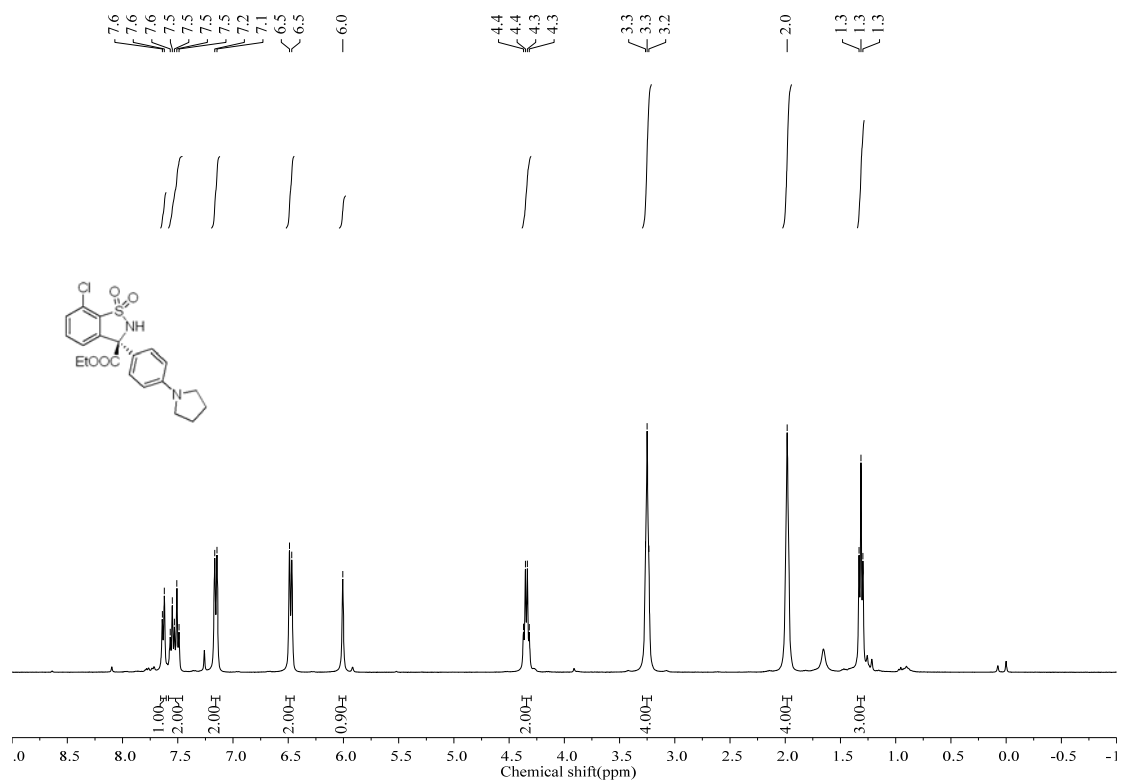

**3ah**  $^{13}\text{C}$   $\{^1\text{H}\}$  NMR (100 MHz,  $\text{CDCl}_3$ )

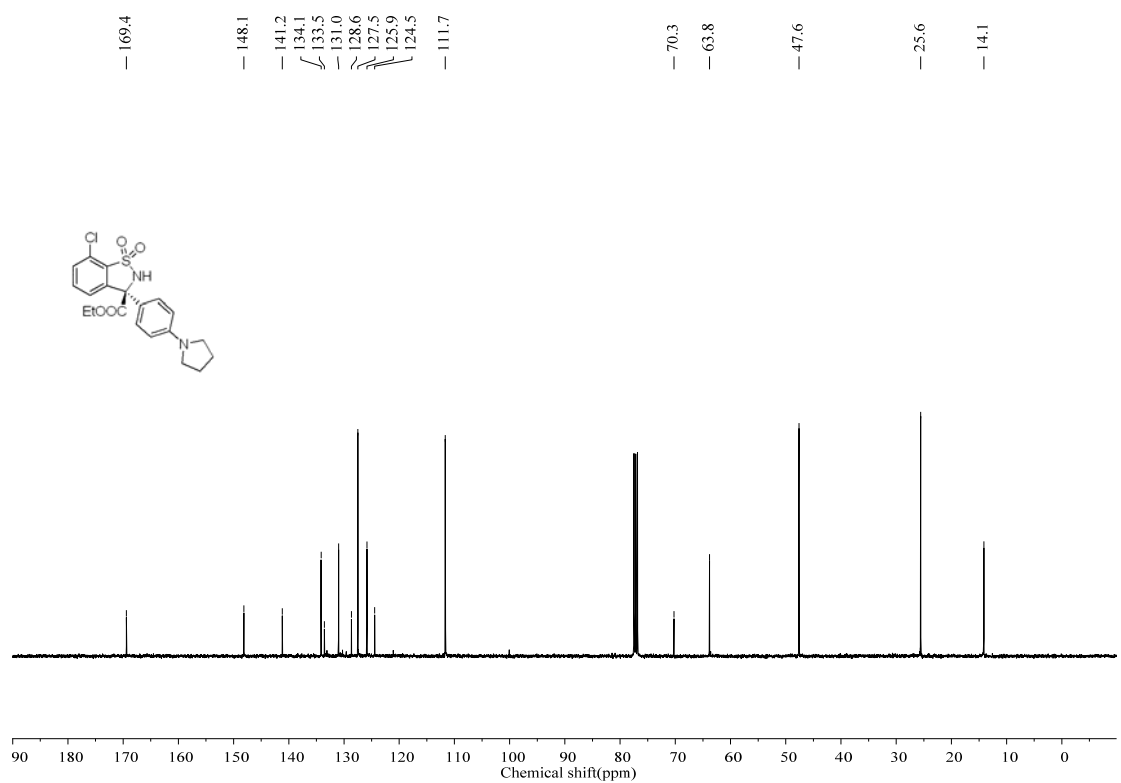

**3ai**  $^1\text{H}$  NMR (400 MHz,  $\text{CDCl}_3$ )

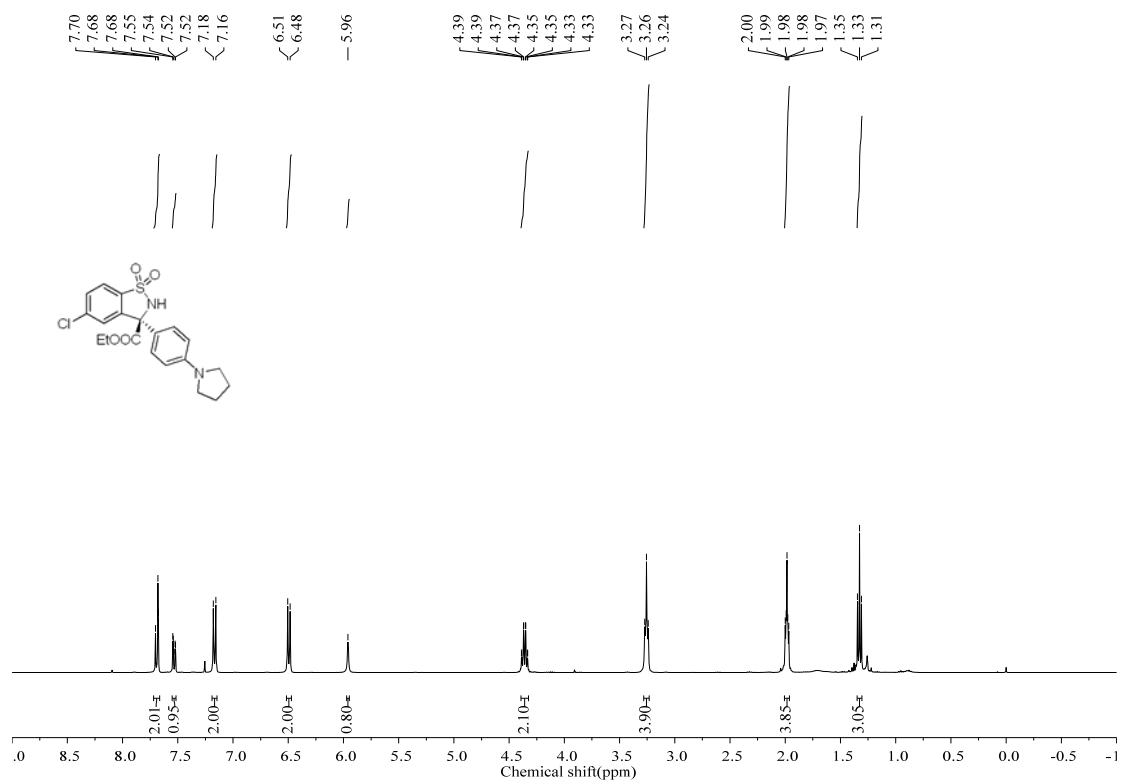

**3ai**  $^{13}\text{C}$  { $^1\text{H}$ } NMR (100 MHz,  $\text{CDCl}_3$ )

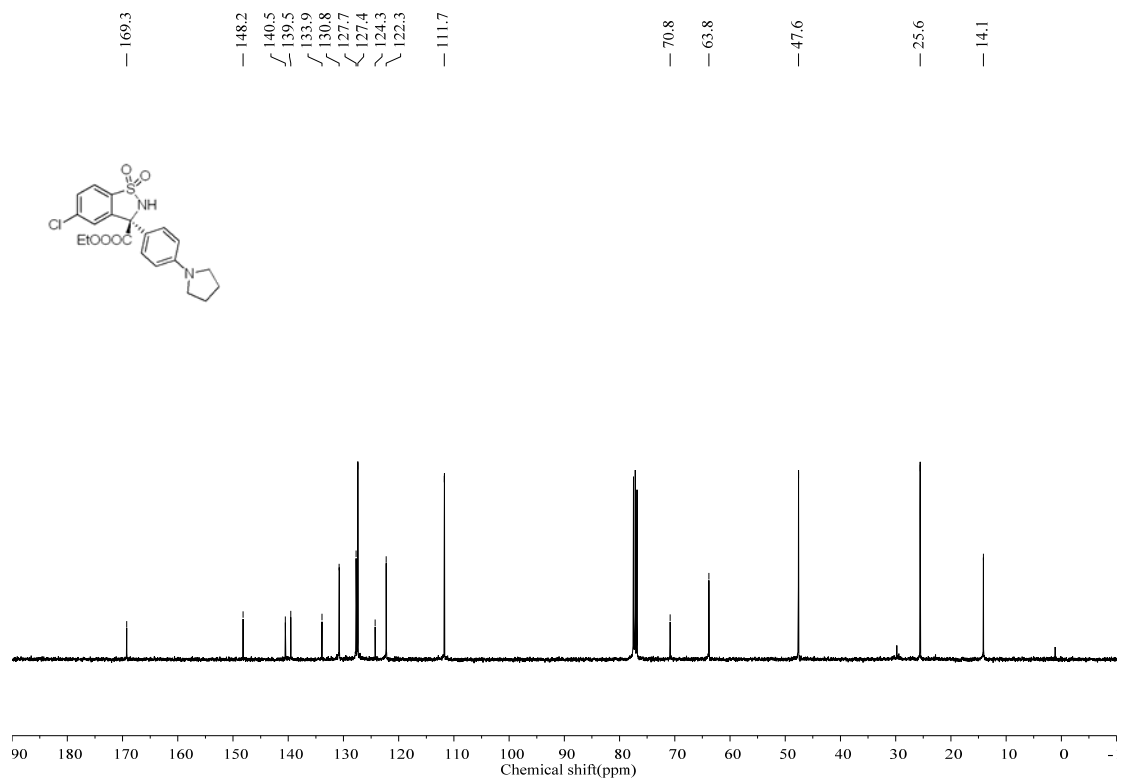

**3aj**  $^1\text{H}$  NMR (400 MHz,  $\text{CDCl}_3$ )

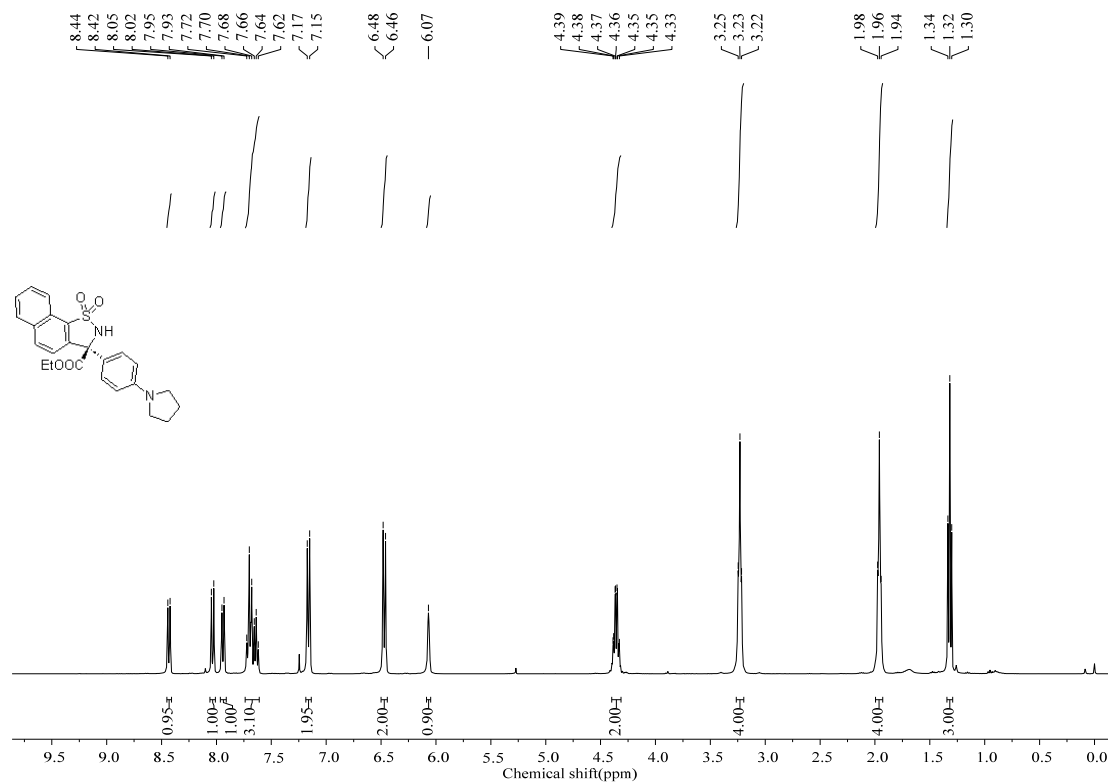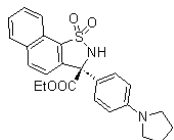

**3aj**  $^{13}\text{C}$   $\{^1\text{H}\}$  NMR (100 MHz,  $\text{CDCl}_3$ )

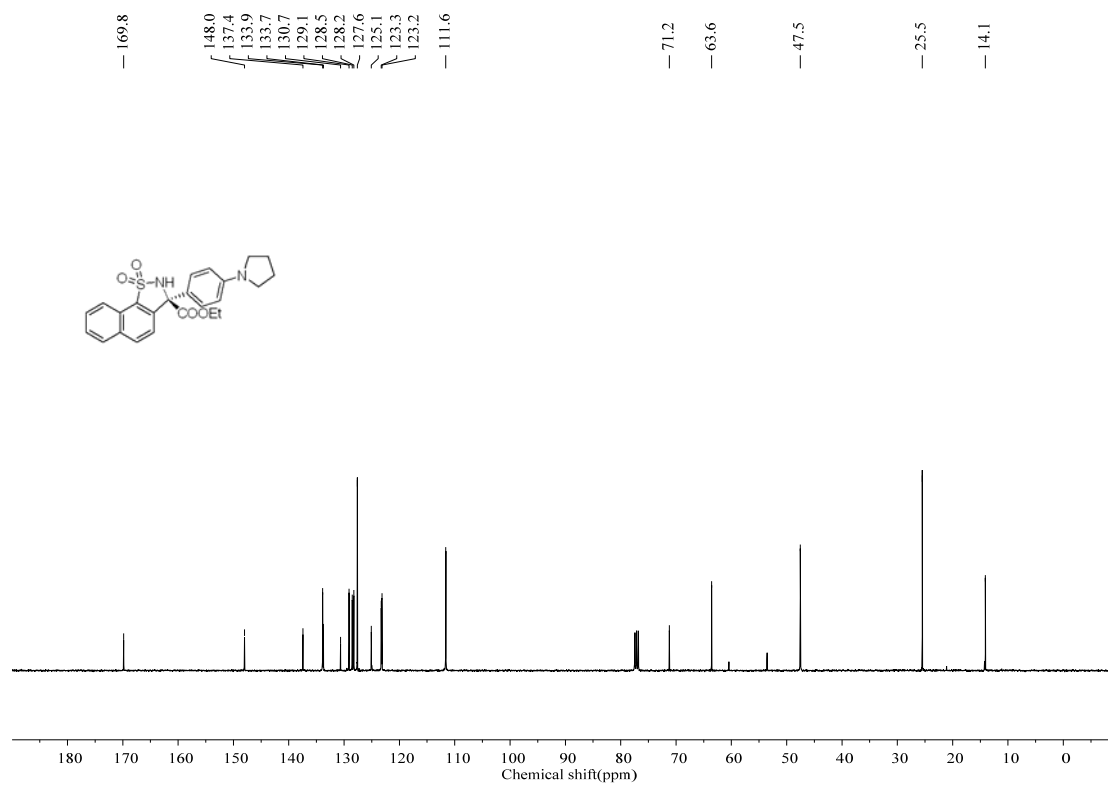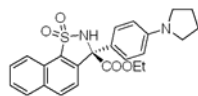

**3ak**  $^1\text{H}$  NMR (400 MHz,  $\text{CDCl}_3$ )

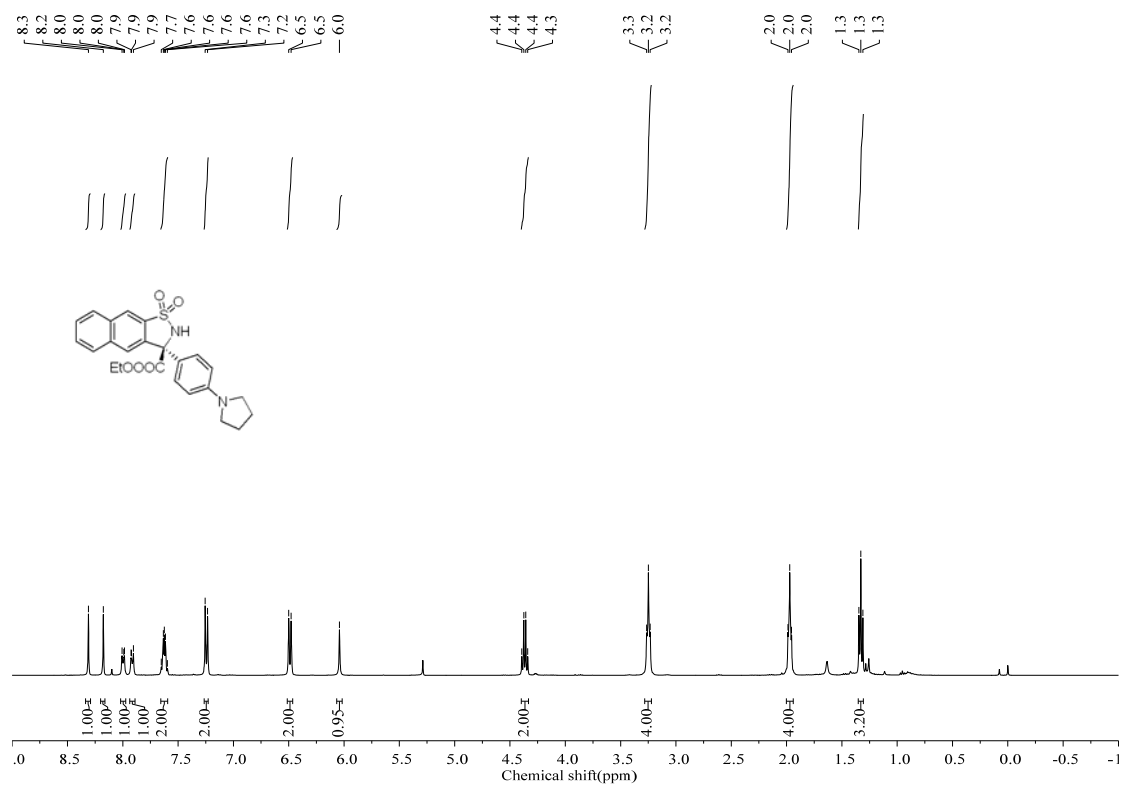

**3ak**  $^{13}\text{C}$   $\{^1\text{H}\}$  NMR (100 MHz,  $\text{CDCl}_3$ )

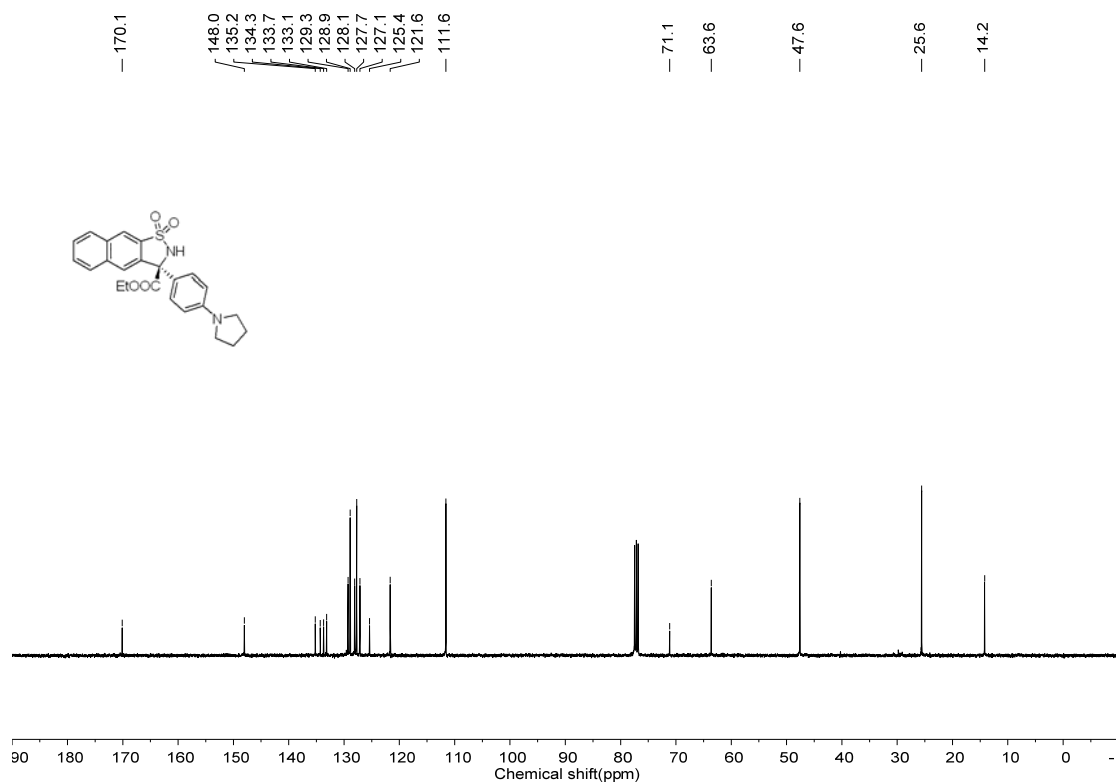

**3ba**  $^1\text{H}$  NMR (400 MHz,  $\text{CDCl}_3$ )

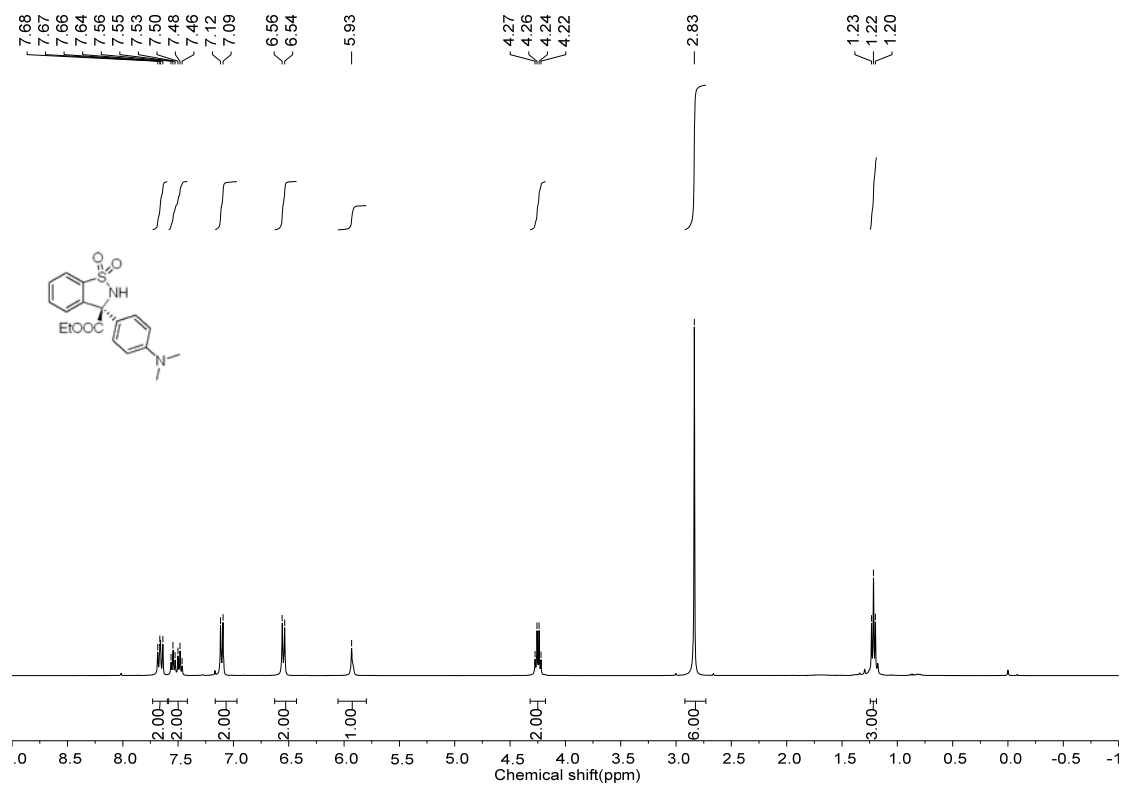

**3ba**  $^{13}\text{C}$   $\{^1\text{H}\}$  NMR (100 MHz,  $\text{CDCl}_3$ )

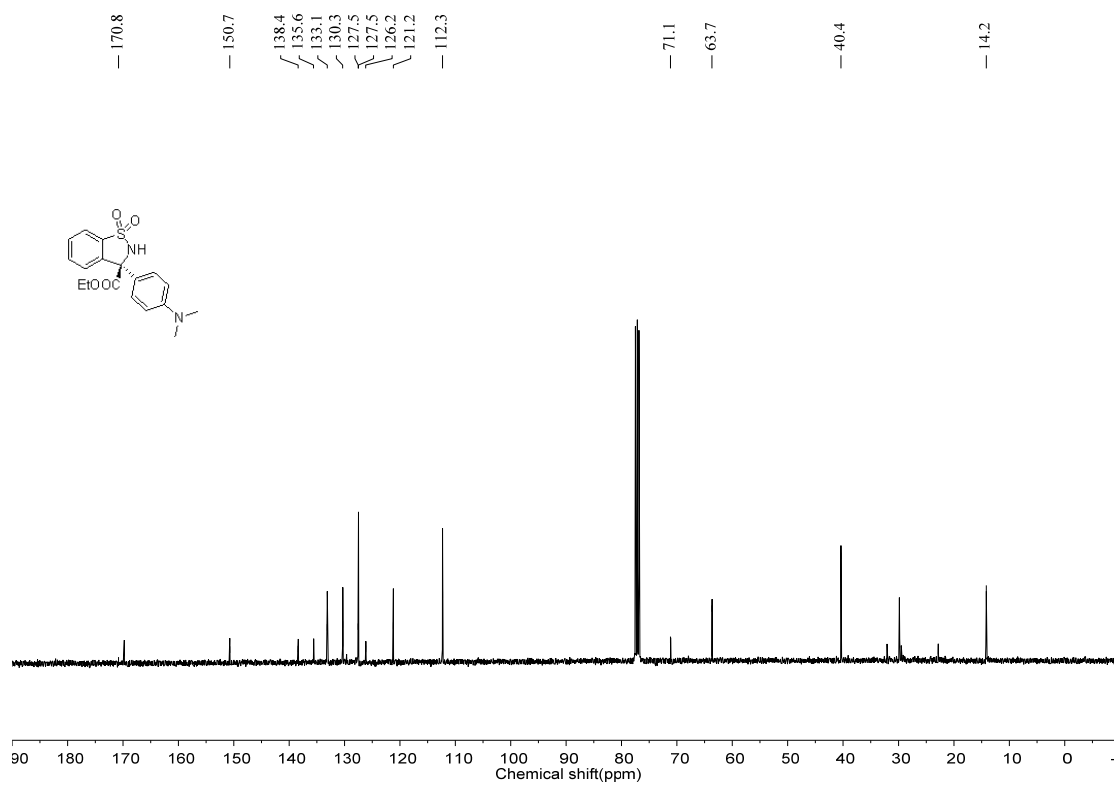

**3bb**  $^1\text{H}$  NMR (400 MHz,  $\text{CDCl}_3$ )

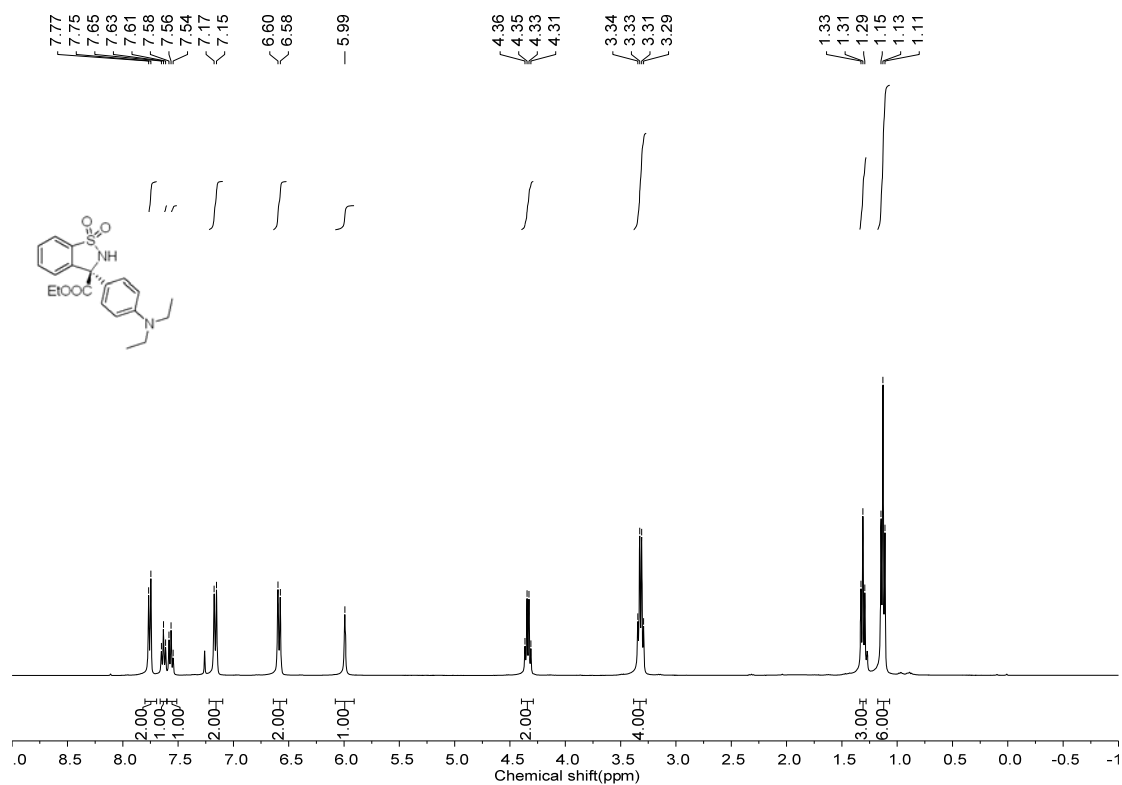

**3bb**  $^{13}\text{C}$   $\{^1\text{H}\}$  NMR (100 MHz,  $\text{CDCl}_3$ )

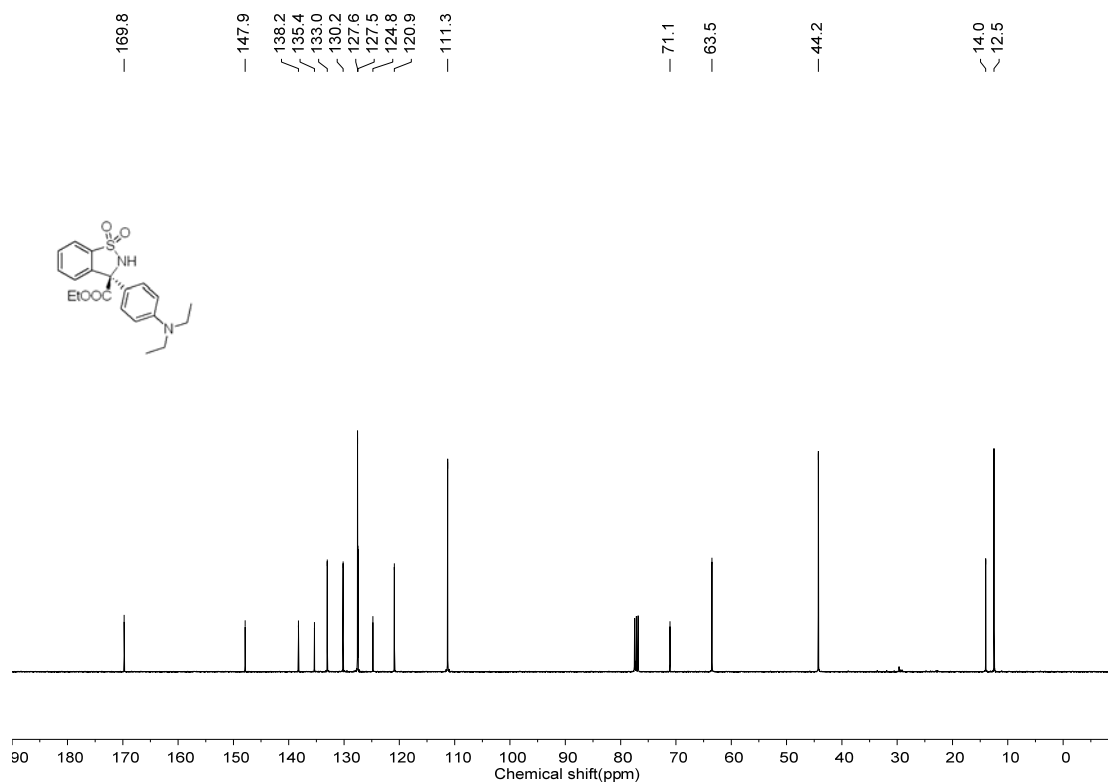

**3bc**  $^1\text{H}$  NMR (400 MHz,  $\text{CDCl}_3$ )

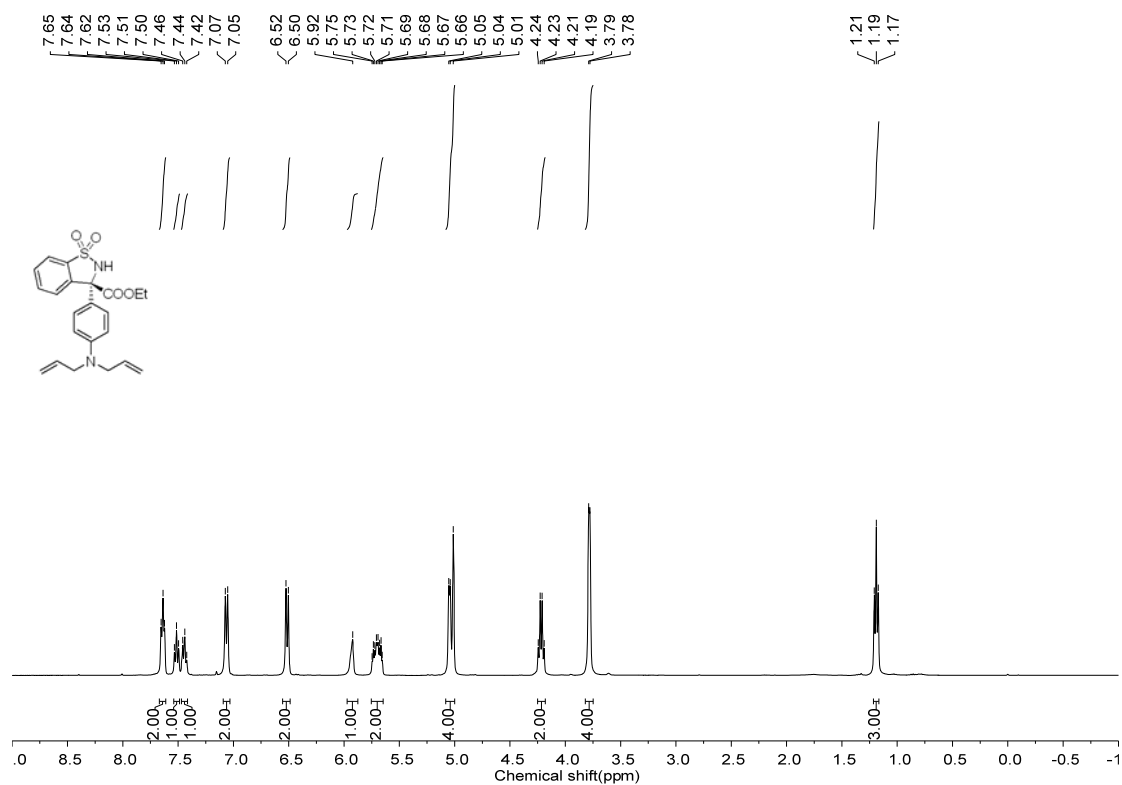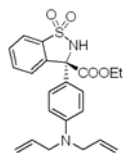

**3bc**  $^{13}\text{C}$   $\{^1\text{H}\}$  NMR (100 MHz,  $\text{CDCl}_3$ )

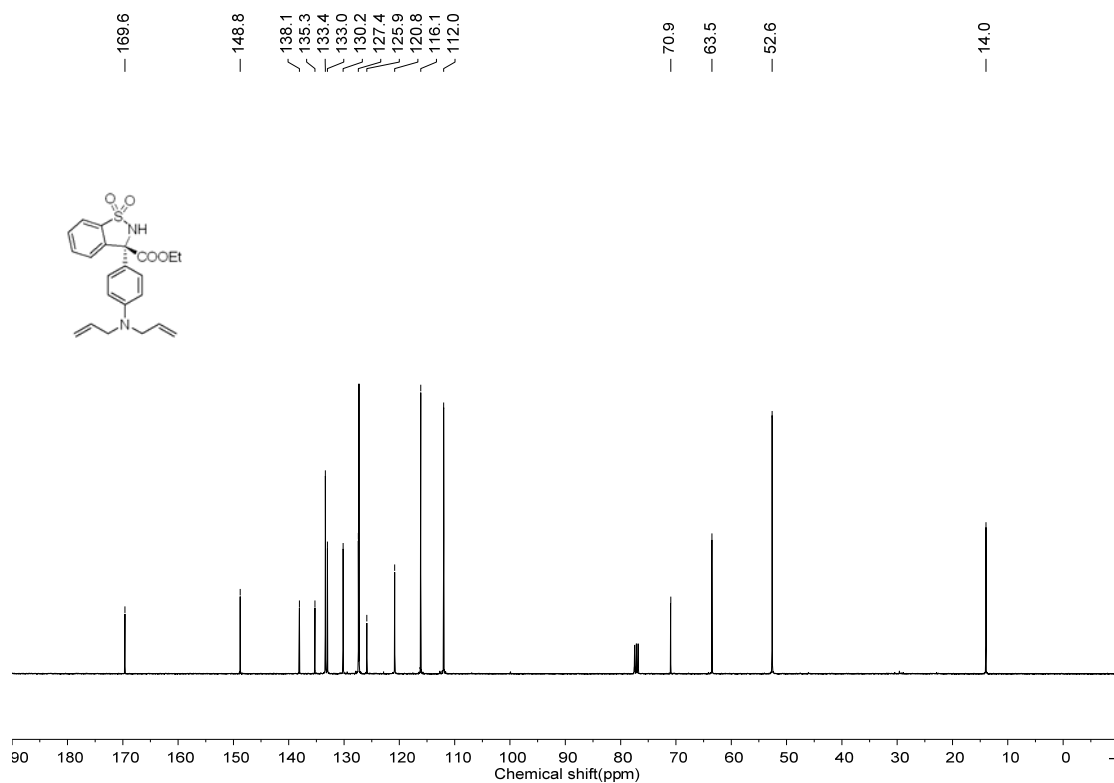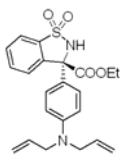



**3bd**  $^1\text{H}$  NMR (400 MHz,  $\text{CDCl}_3$ )

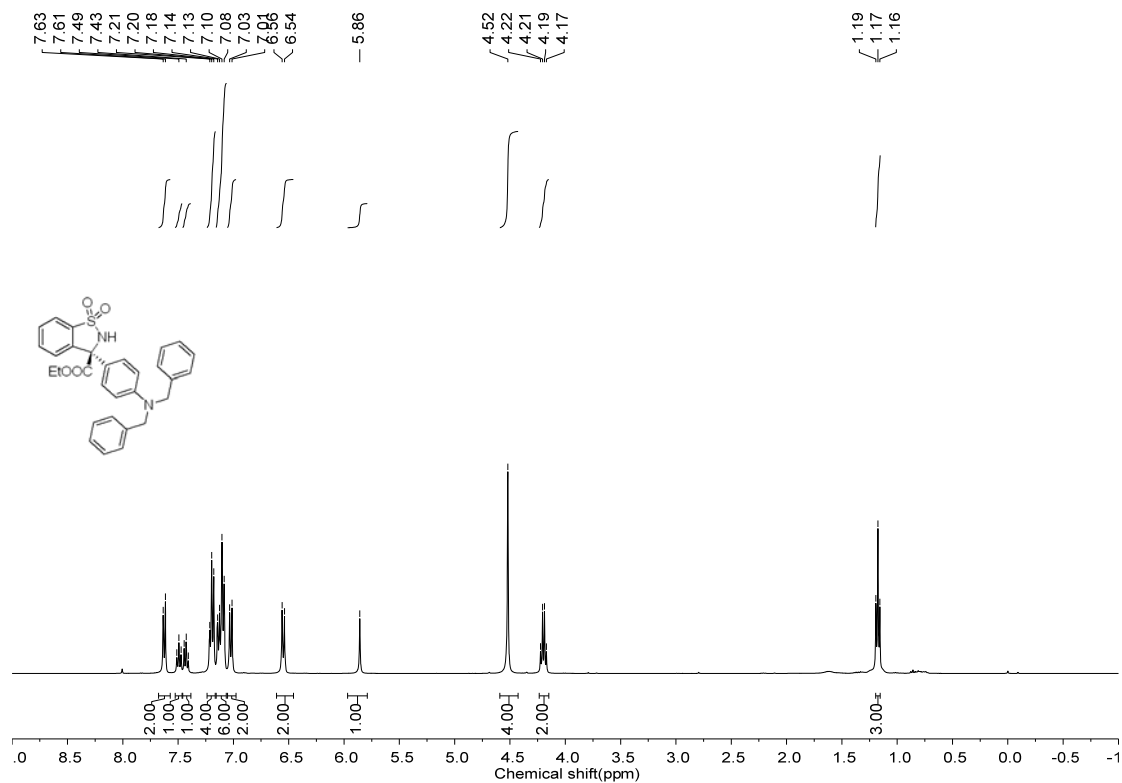

**3bd**  $^{13}\text{C}$   $\{^1\text{H}\}$  NMR (100 MHz,  $\text{CDCl}_3$ )

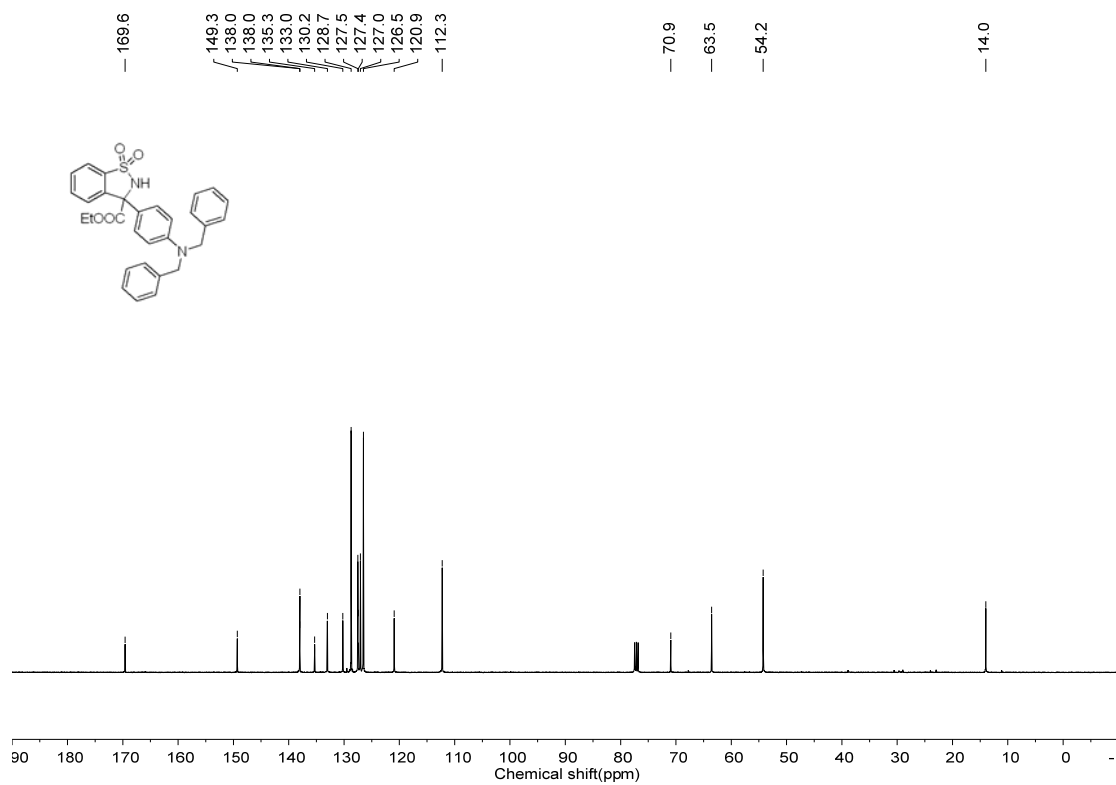

**3be**  $^1\text{H}$  NMR (400 MHz,  $\text{CDCl}_3$ )

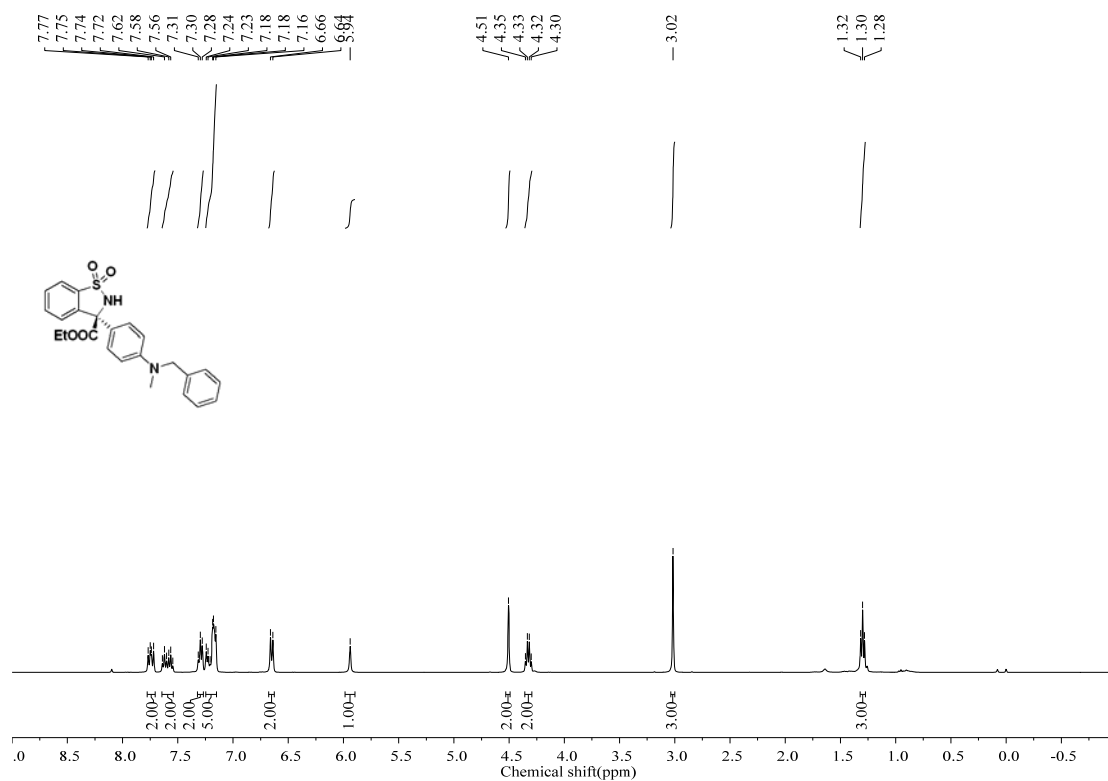

**3be**  $^{13}\text{C}$   $\{^1\text{H}\}$  NMR (100 MHz,  $\text{CDCl}_3$ )

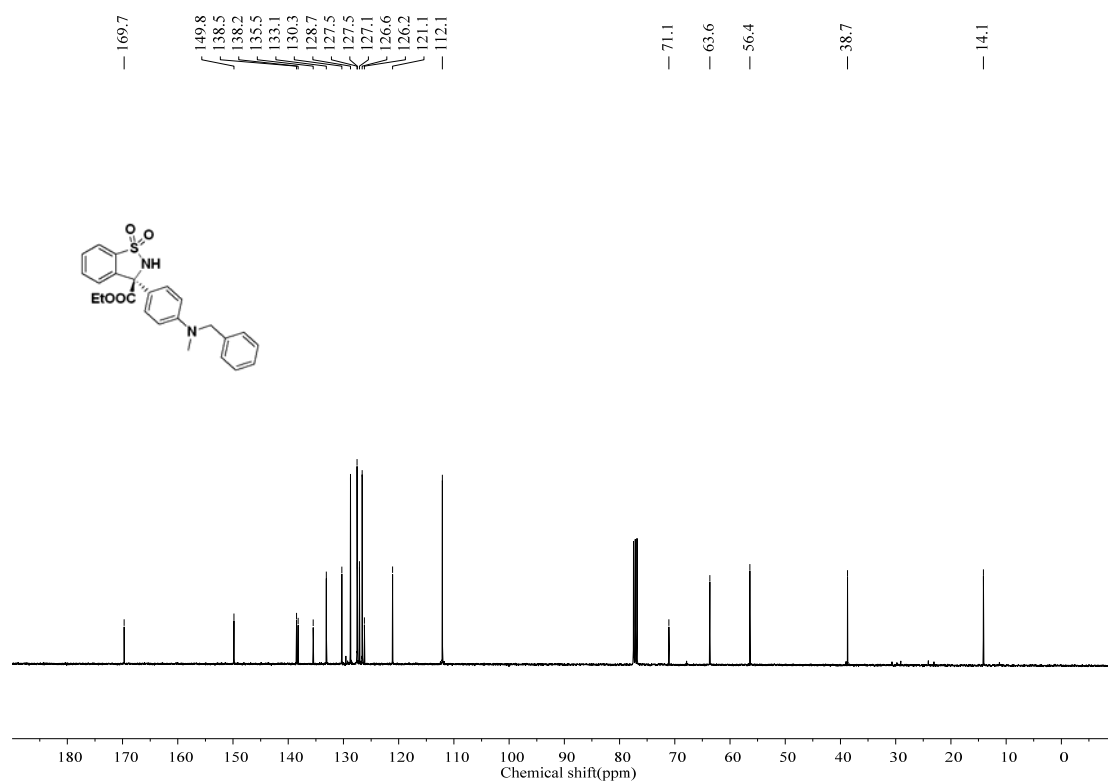

**3bf**  $^1\text{H}$  NMR (400 MHz,  $\text{CDCl}_3$ )

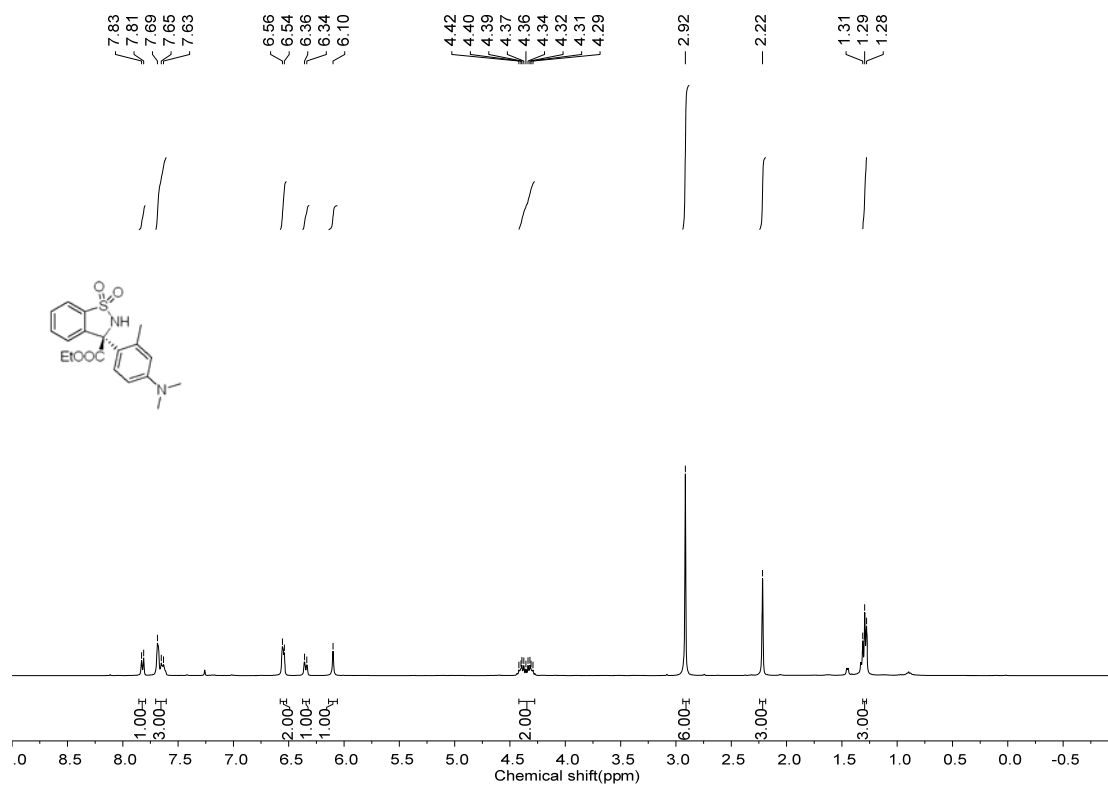

**3bf**  $^{13}\text{C}$   $\{^1\text{H}\}$  NMR (100 MHz,  $\text{CDCl}_3$ )

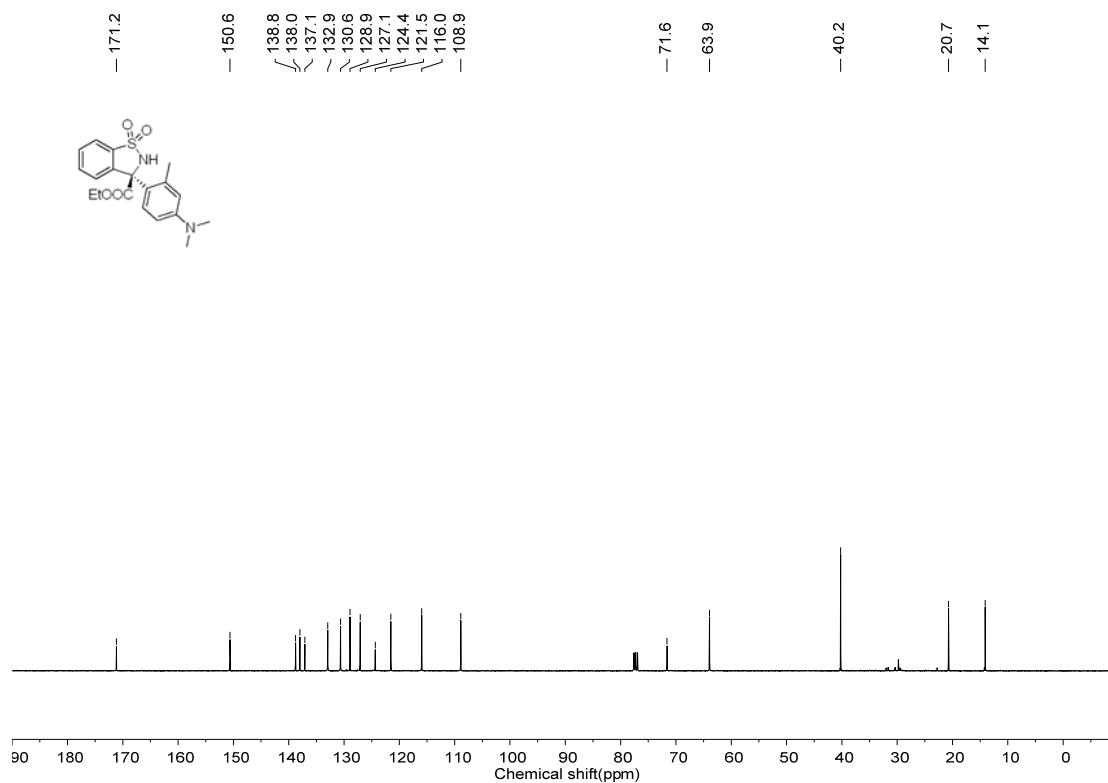

**3bg**  $^1\text{H}$  NMR (400 MHz,  $\text{CDCl}_3$ )

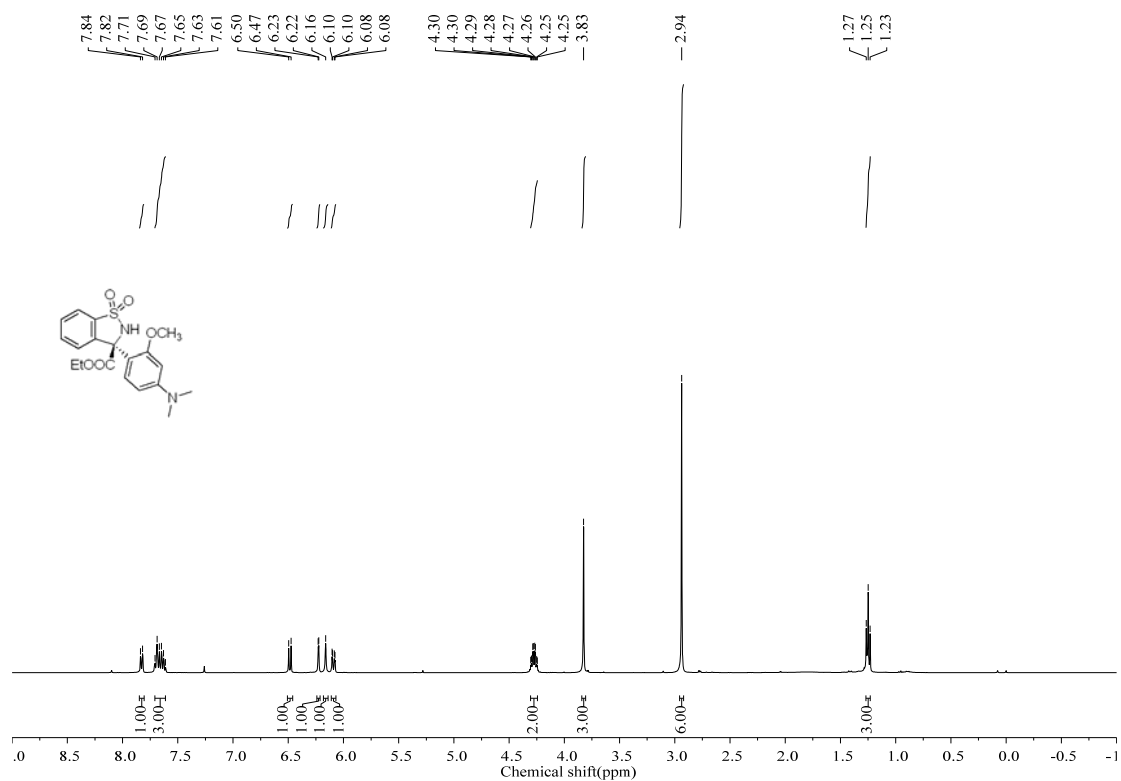

**3bg**  $^{13}\text{C}$  { $^1\text{H}$ } NMR (100 MHz,  $\text{CDCl}_3$ )

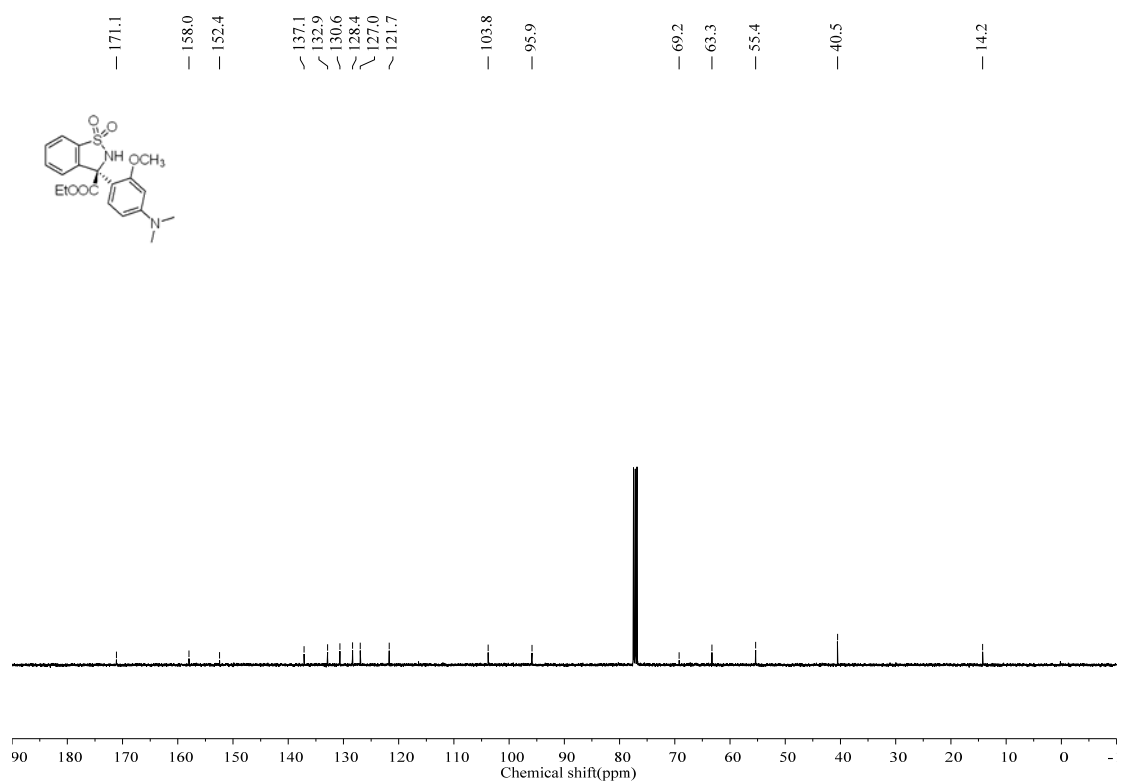

**3bh**  $^1\text{H}$  NMR (400 MHz,  $\text{CDCl}_3$ )

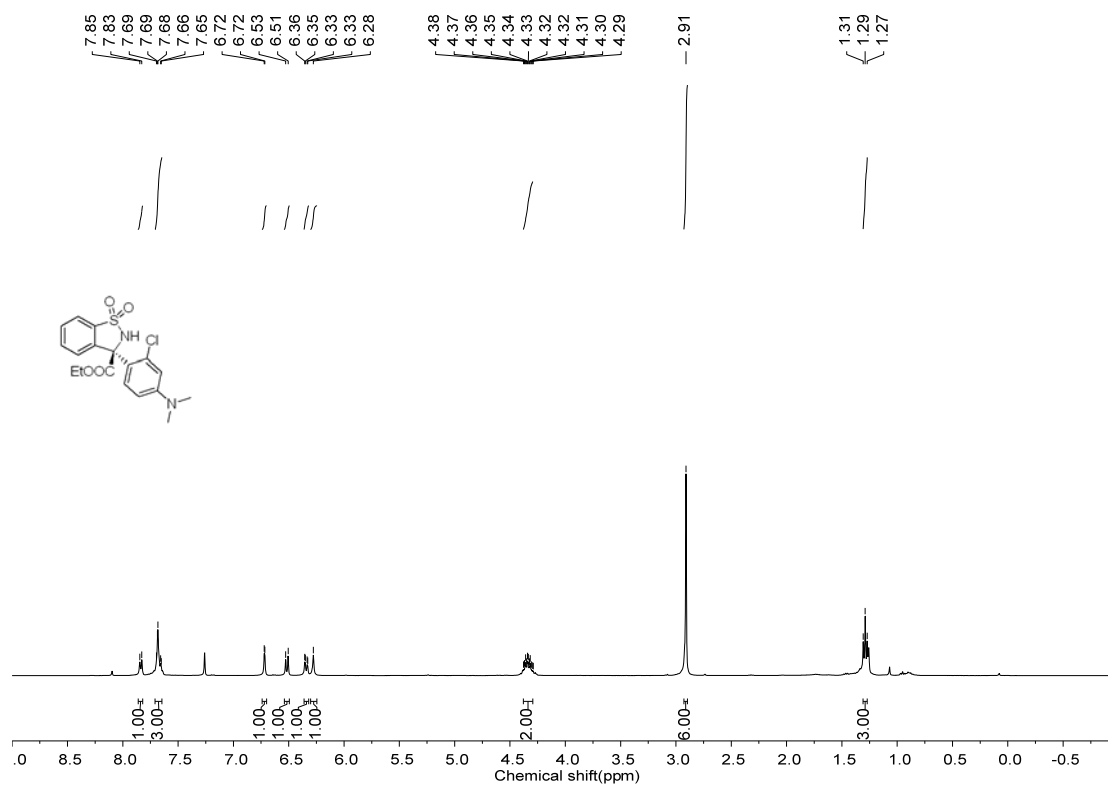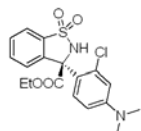

**3bh**  $^{13}\text{C}$   $\{^1\text{H}\}$  NMR (100 MHz,  $\text{CDCl}_3$ )

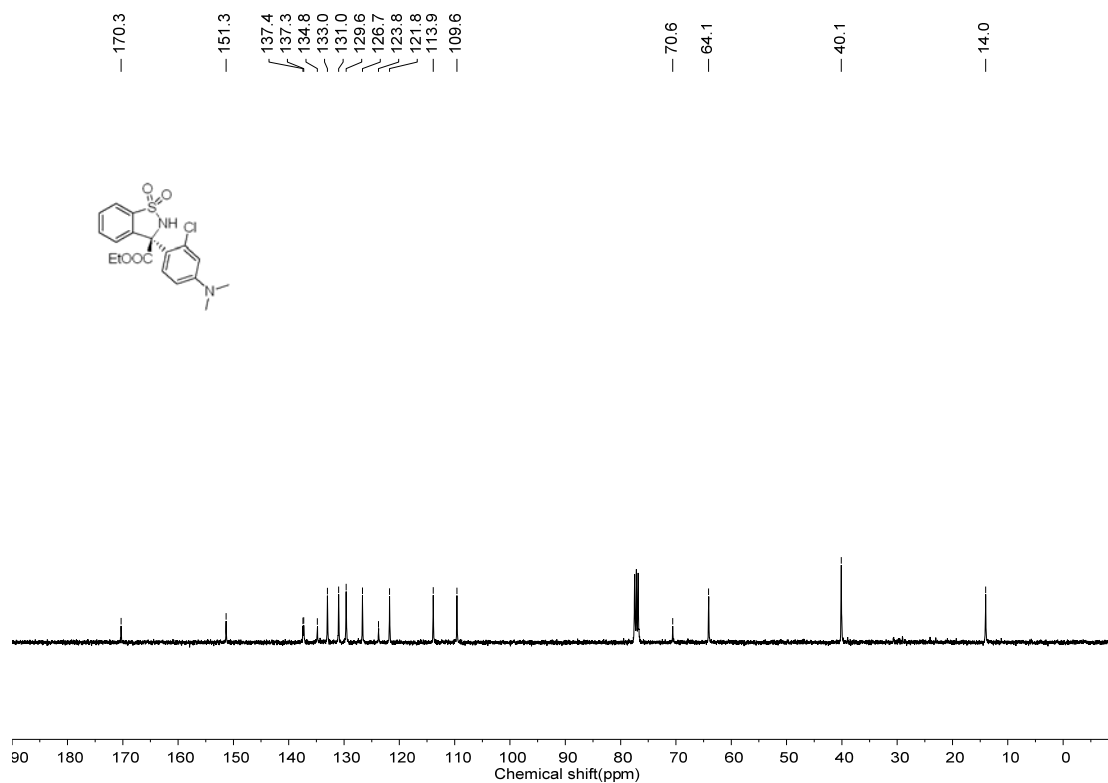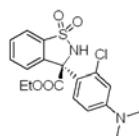

**3bi**  $^1\text{H}$  NMR (400 MHz,  $\text{CDCl}_3$ )

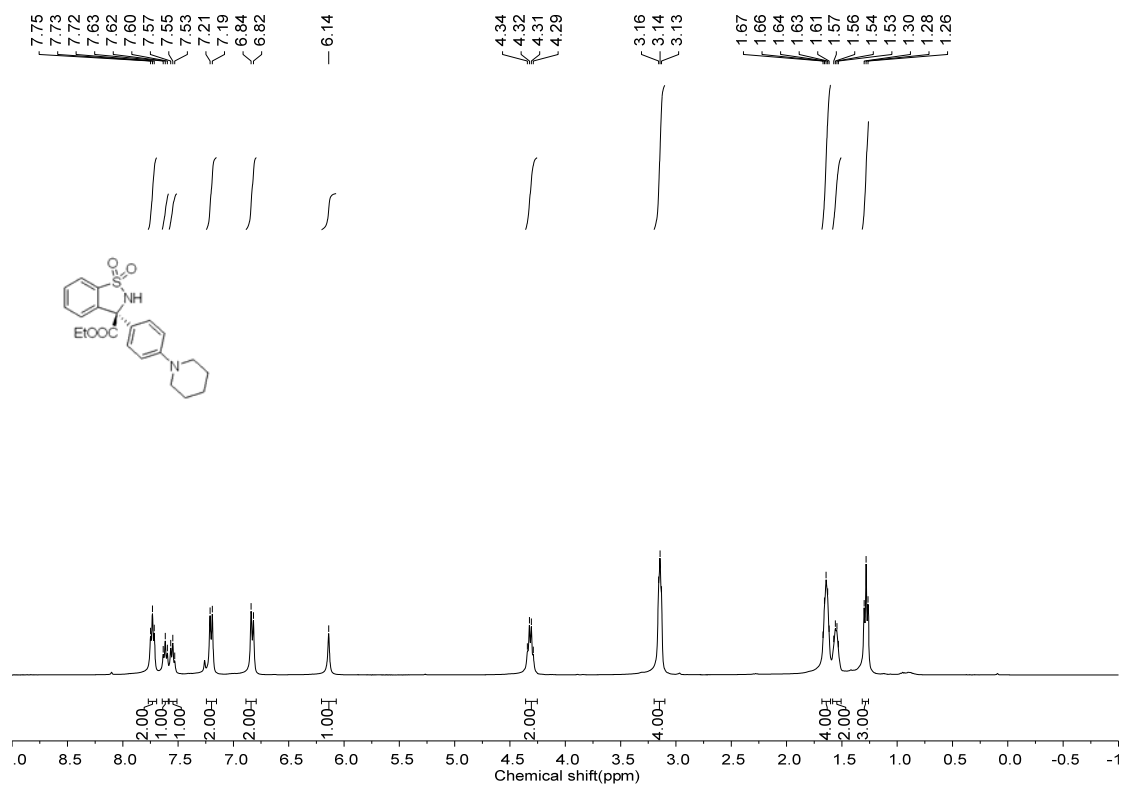

**3bi**  $^{13}\text{C}$   $\{^1\text{H}\}$  NMR (100 MHz,  $\text{CDCl}_3$ )

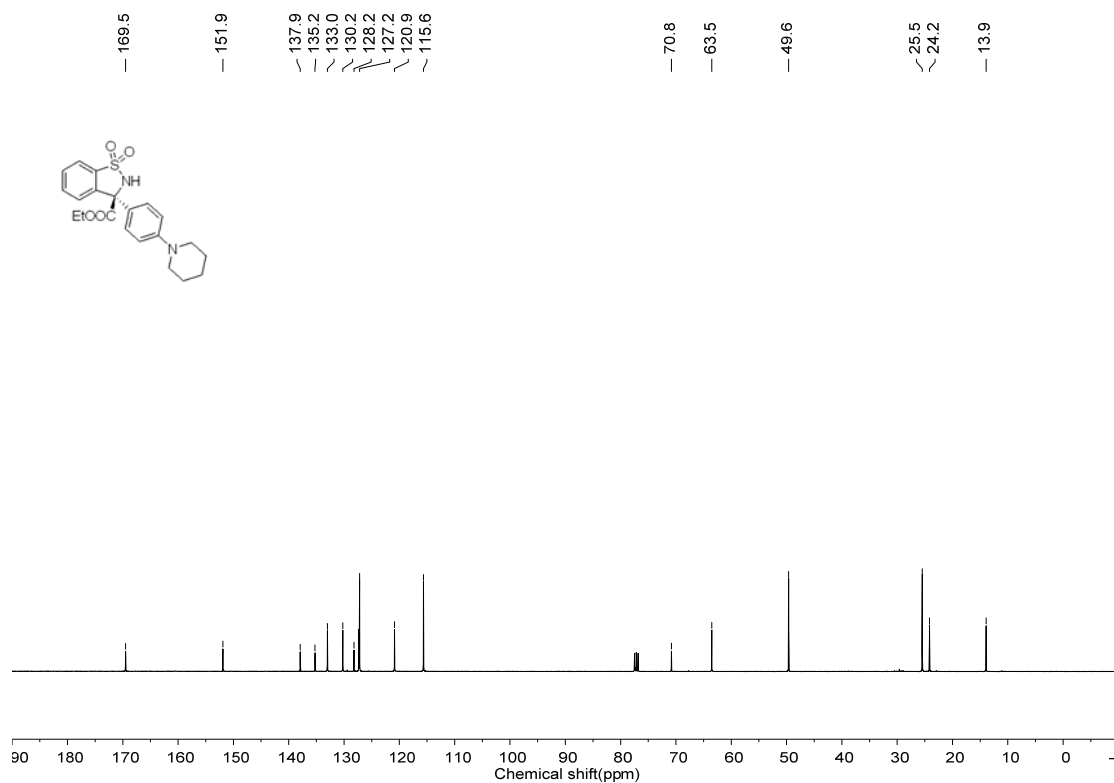

**3bj**  $^1\text{H}$  NMR (400 MHz,  $\text{CDCl}_3$ )

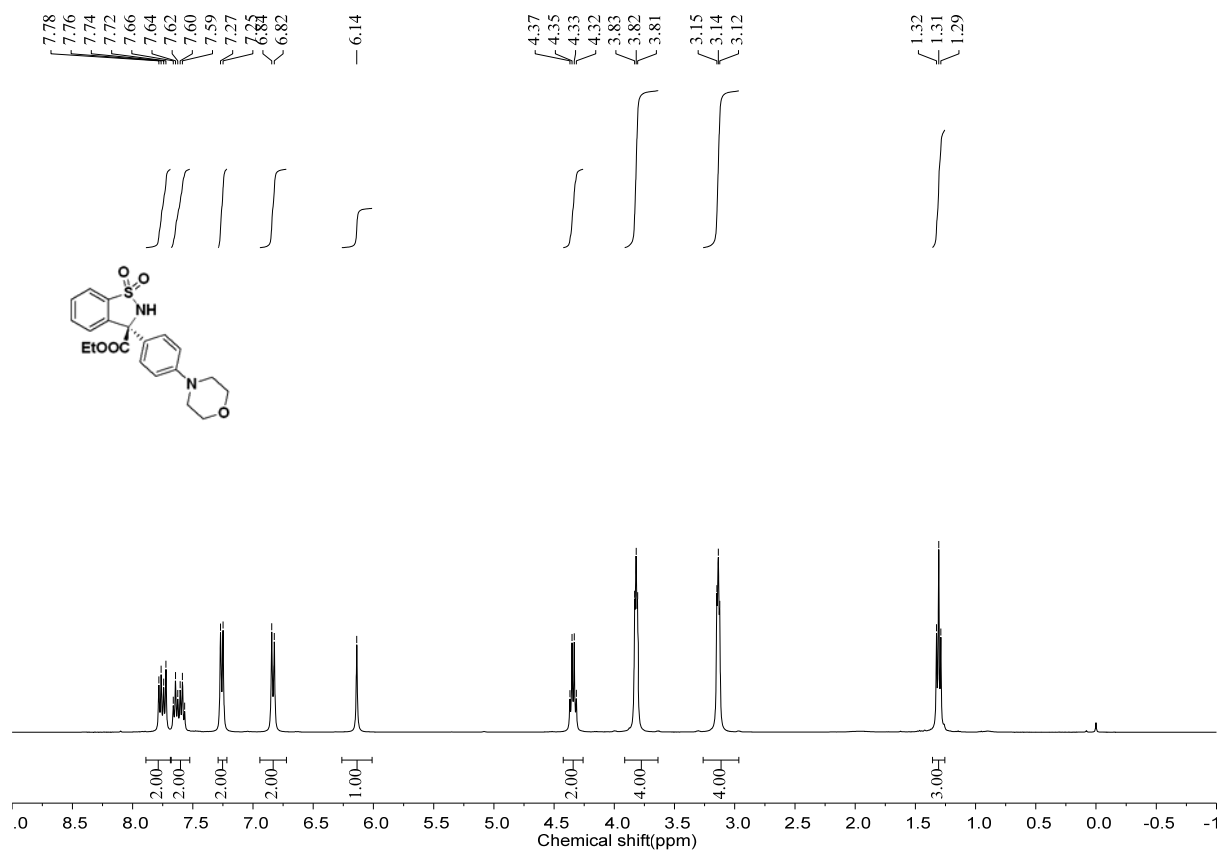

**3bj**  $^{13}\text{C}$  { $^1\text{H}$ } NMR (100 MHz,  $\text{CDCl}_3$ )

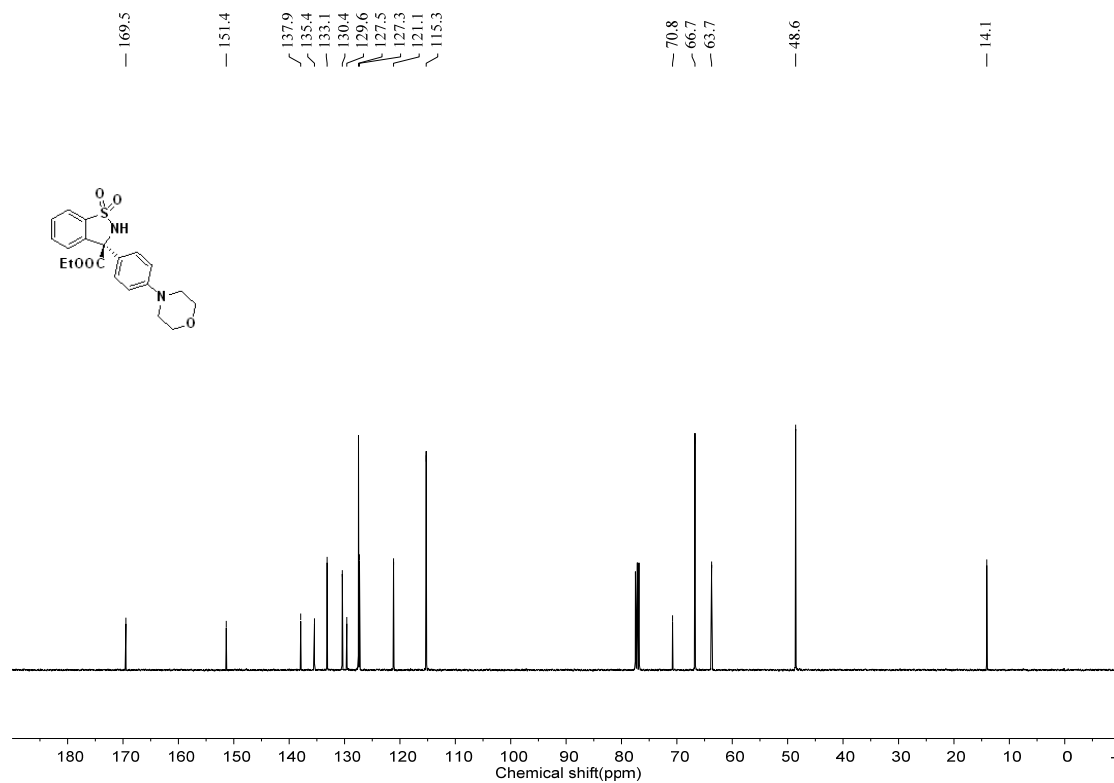

**3bk**  $^1\text{H}$  NMR (400 MHz,  $\text{CDCl}_3$ )

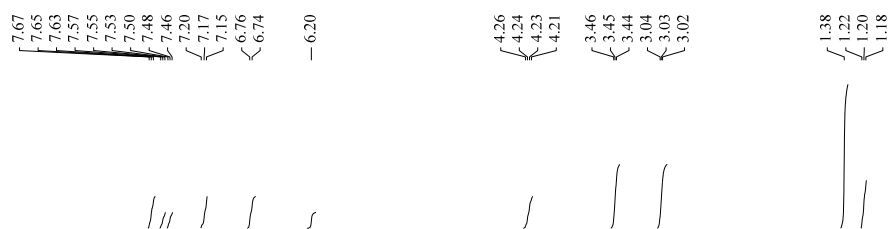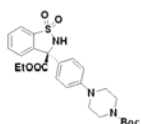

**3bs**  $^1\text{H}$  NMR (400 MHz,  $\text{CDCl}_3$ )

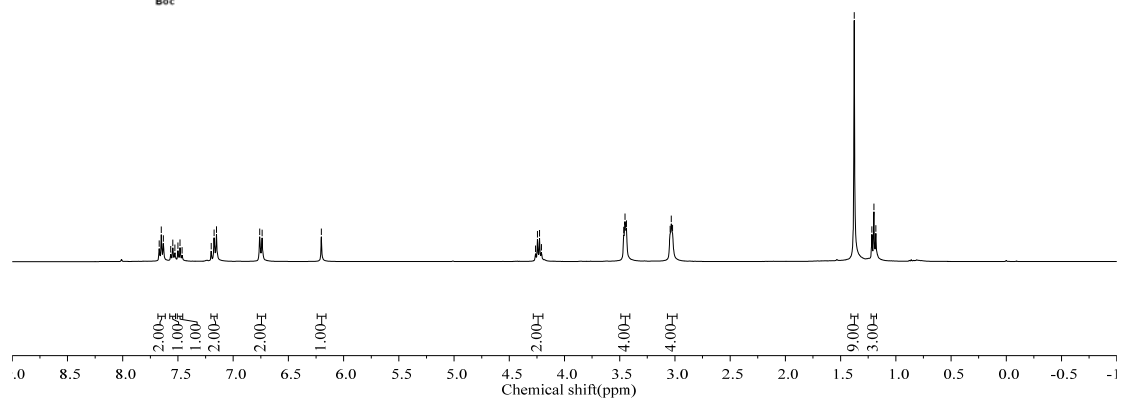

**3bk**  $^{13}\text{C}$   $\{^1\text{H}\}$  NMR (100 MHz,  $\text{CDCl}_3$ )

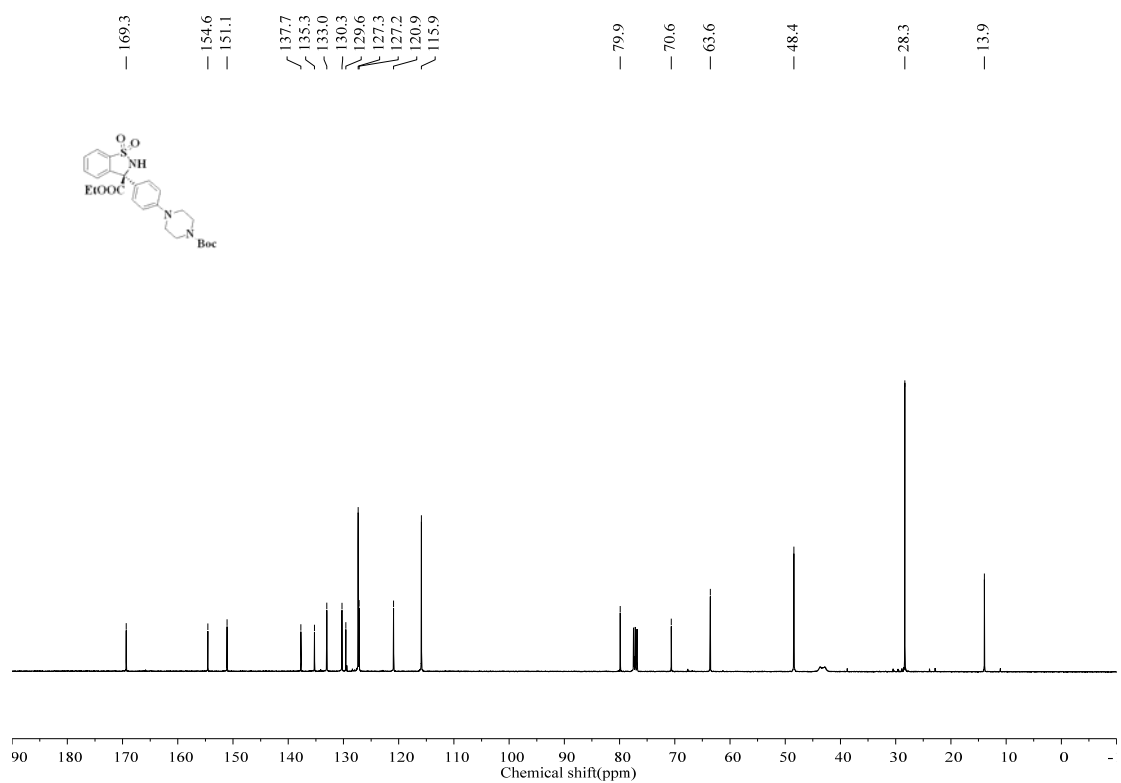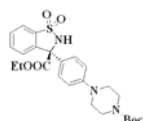



**3bl**  $^1\text{H}$  NMR (400 MHz,  $\text{CDCl}_3$ )

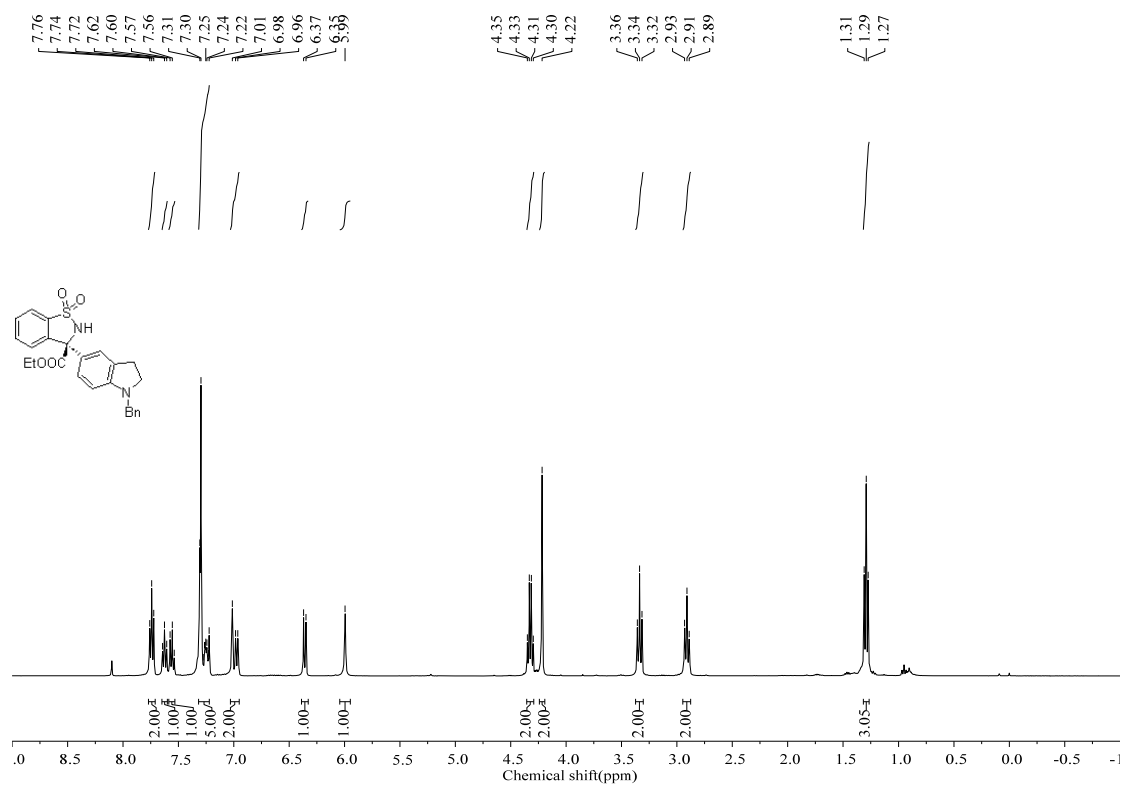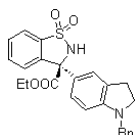

**3bl**  $^{13}\text{C}$   $\{^1\text{H}\}$  NMR (100 MHz,  $\text{CDCl}_3$ )

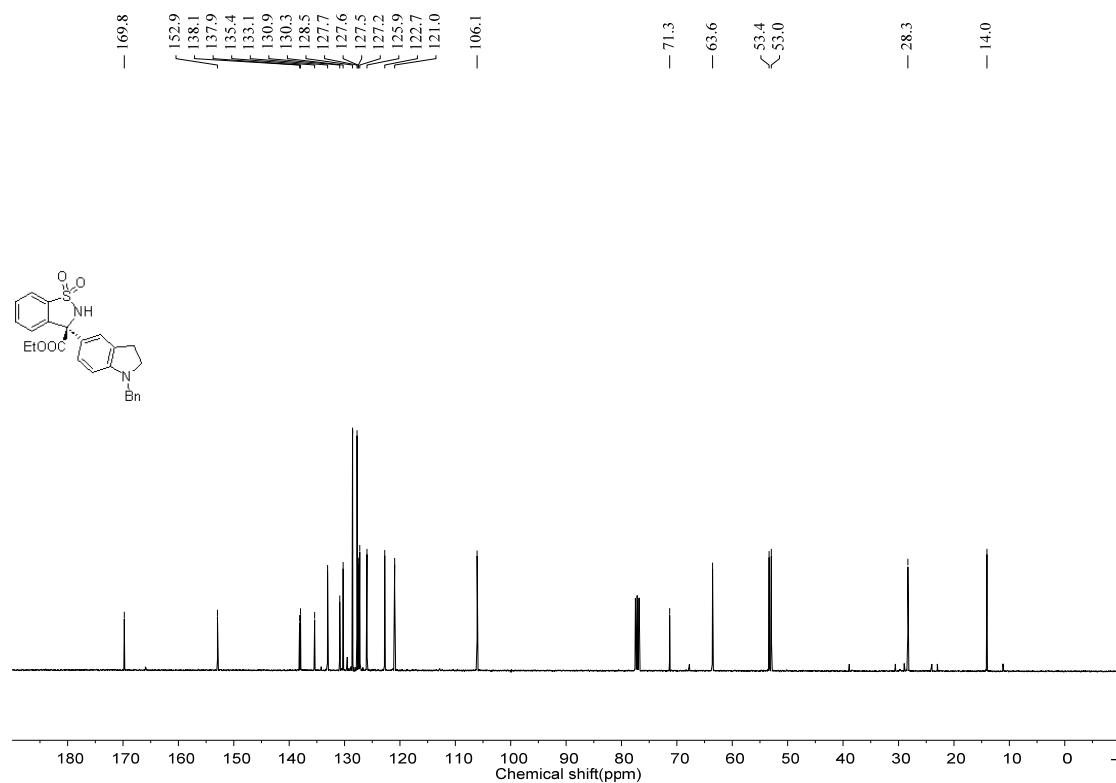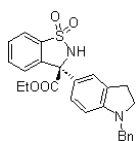

**3bm**  $^1\text{H}$  NMR (400 MHz,  $\text{CDCl}_3$ )

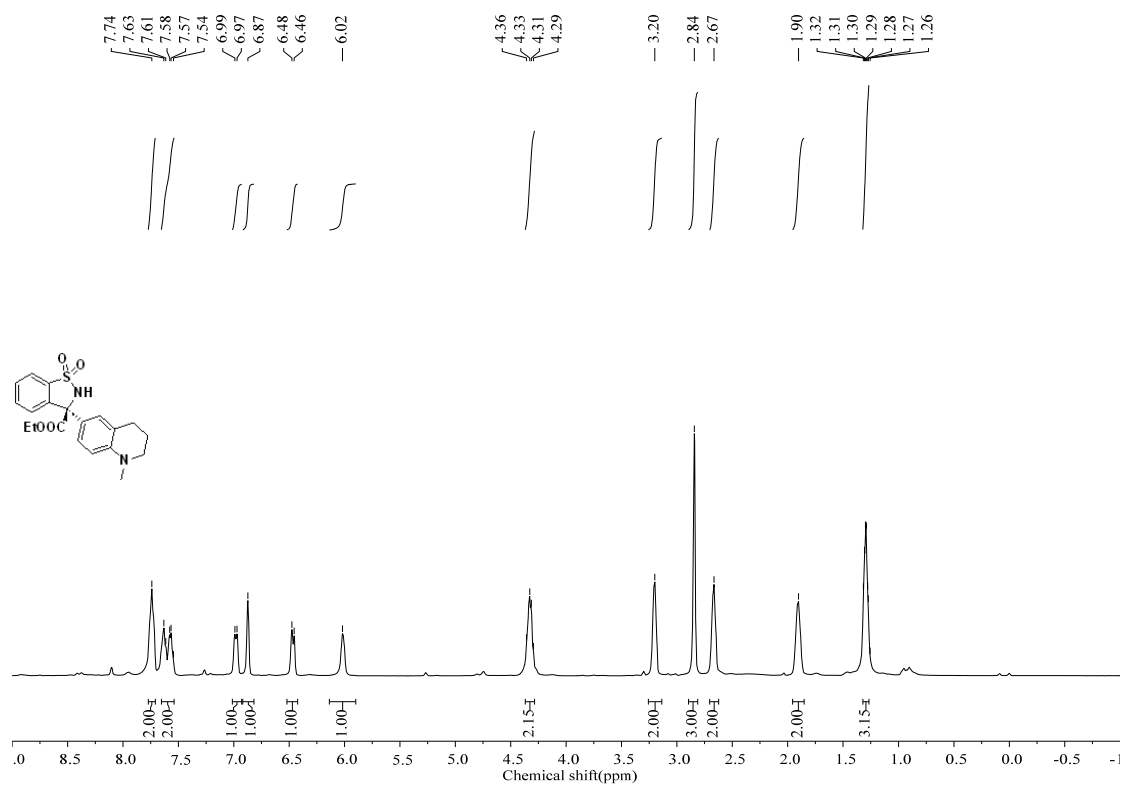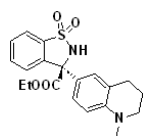

**3bm**  $^{13}\text{C}$   $\{^1\text{H}\}$  NMR (100 MHz,  $\text{CDCl}_3$ )

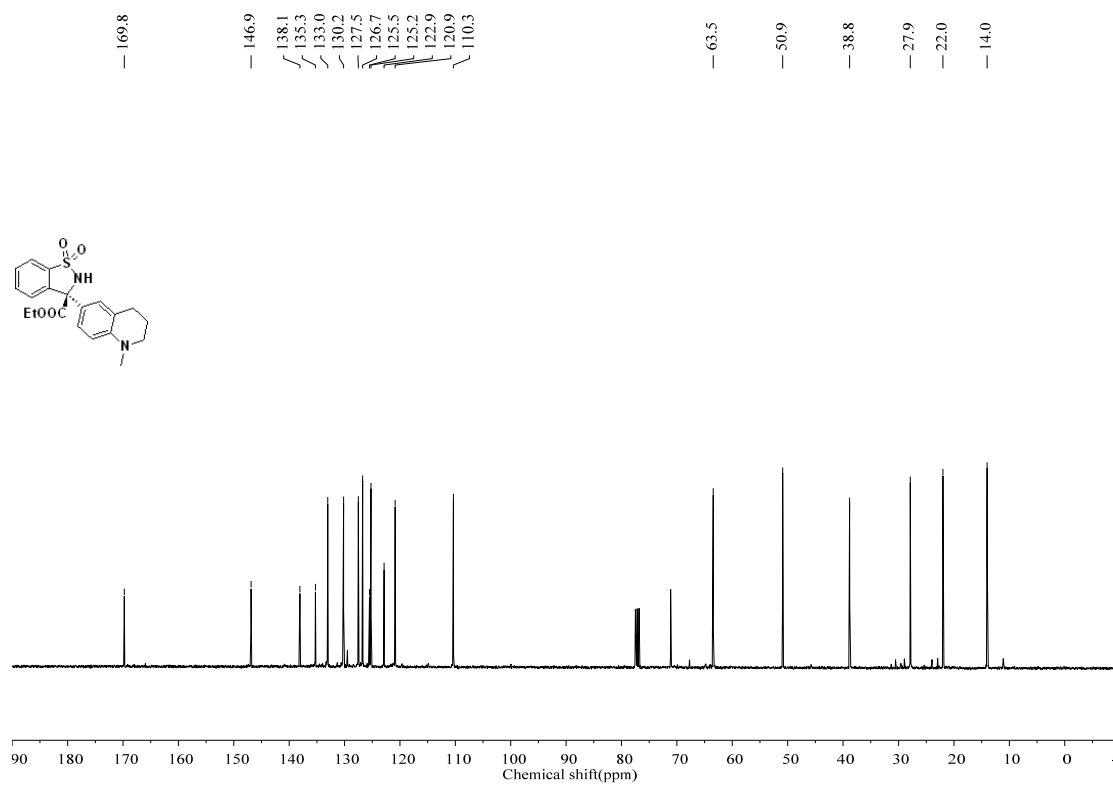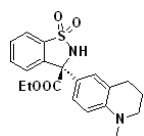

**3bn**  $^1\text{H}$  NMR (400 MHz,  $\text{CDCl}_3$ )

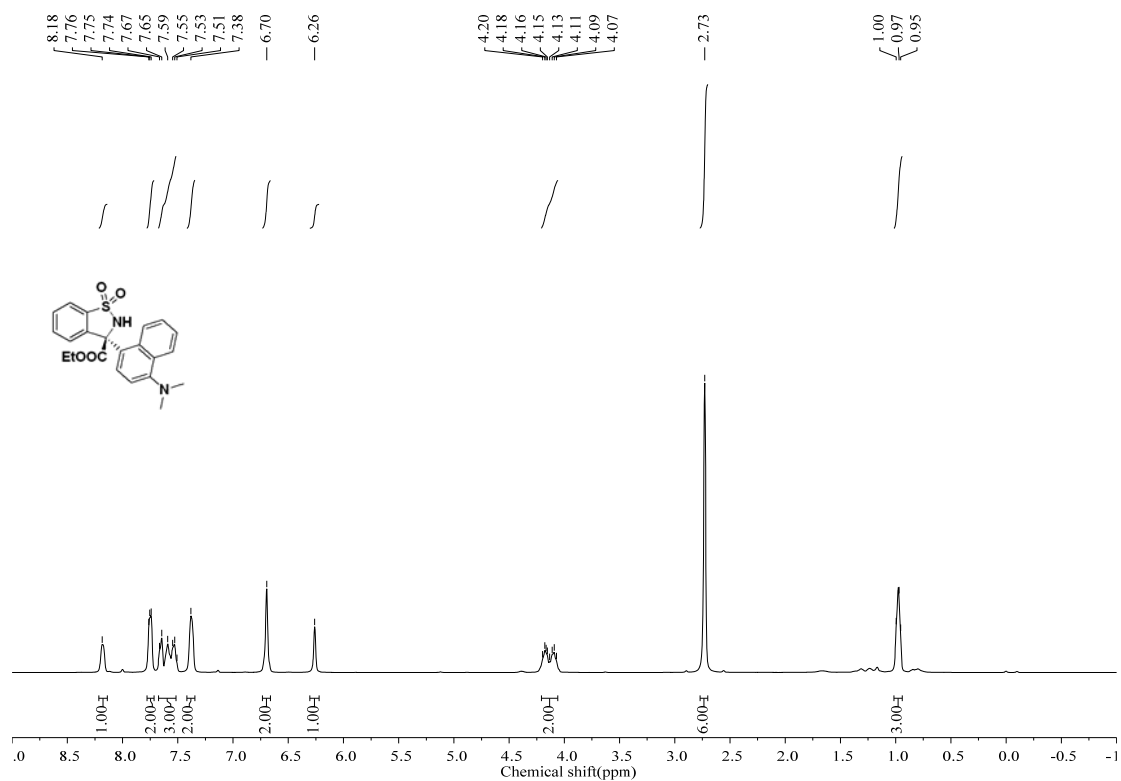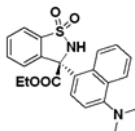

**3bn**  $^{13}\text{C}$   $\{^1\text{H}\}$  NMR (100 MHz,  $\text{CDCl}_3$ )

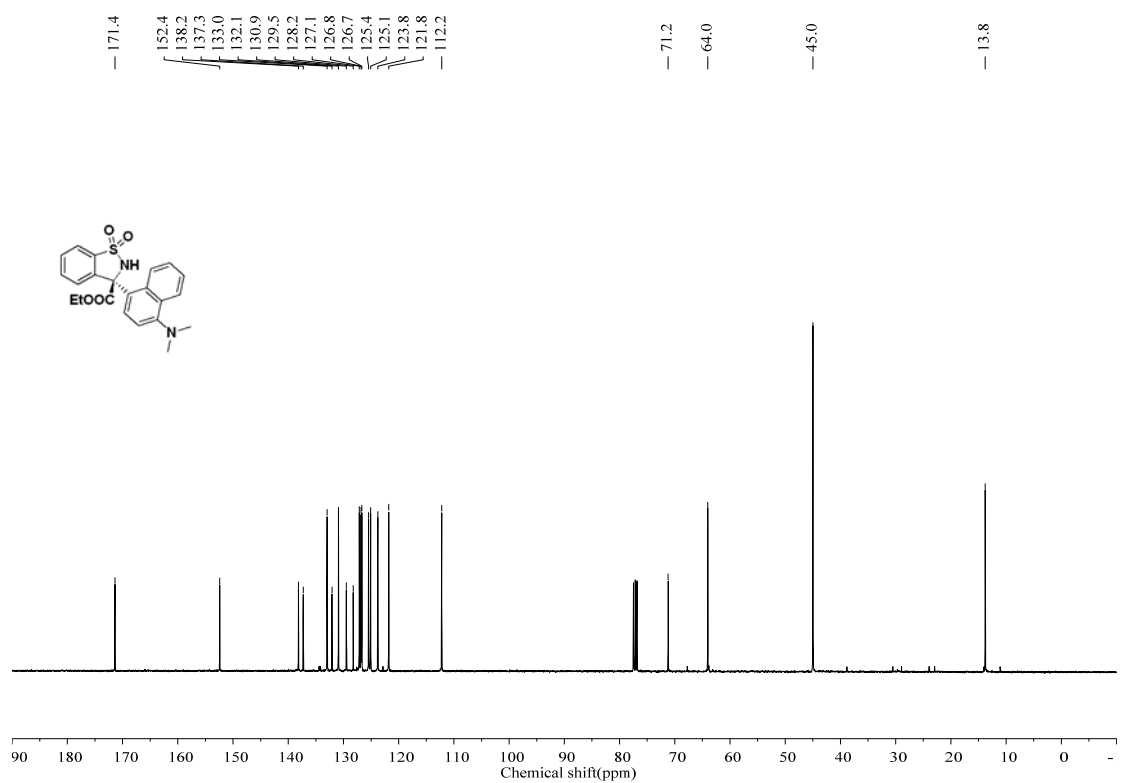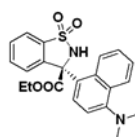

**3bo**  $^1\text{H}$  NMR (400 MHz,  $\text{CDCl}_3$ )

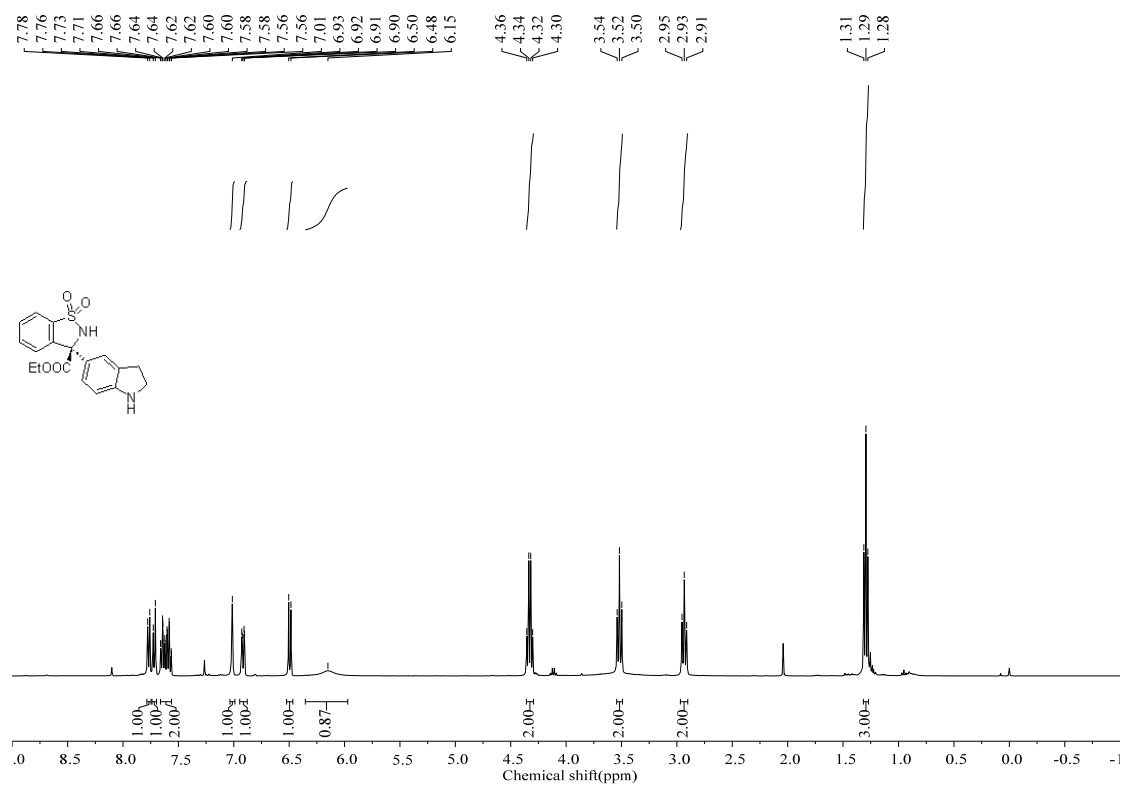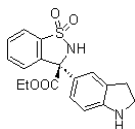

**3bo**  $^{13}\text{C}$   $\{^1\text{H}\}$  NMR (100 MHz,  $\text{CDCl}_3$ )

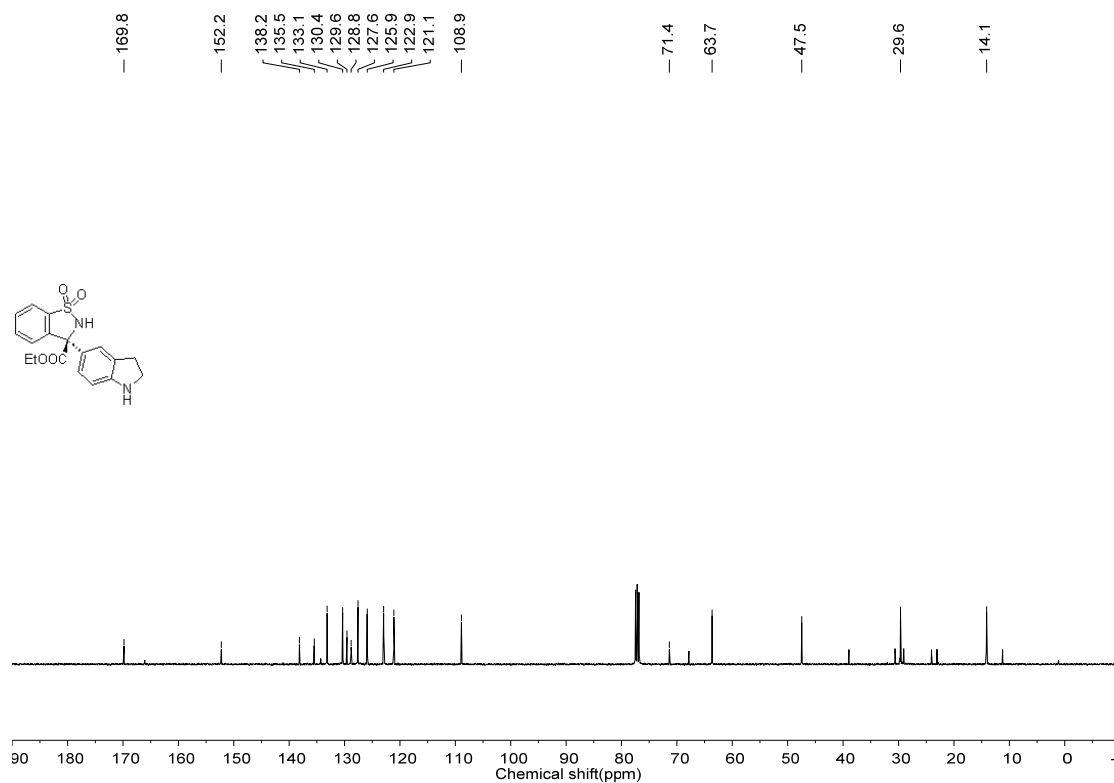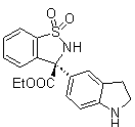

**3bp**  $^1\text{H}$  NMR (400 MHz,  $\text{CDCl}_3$ )

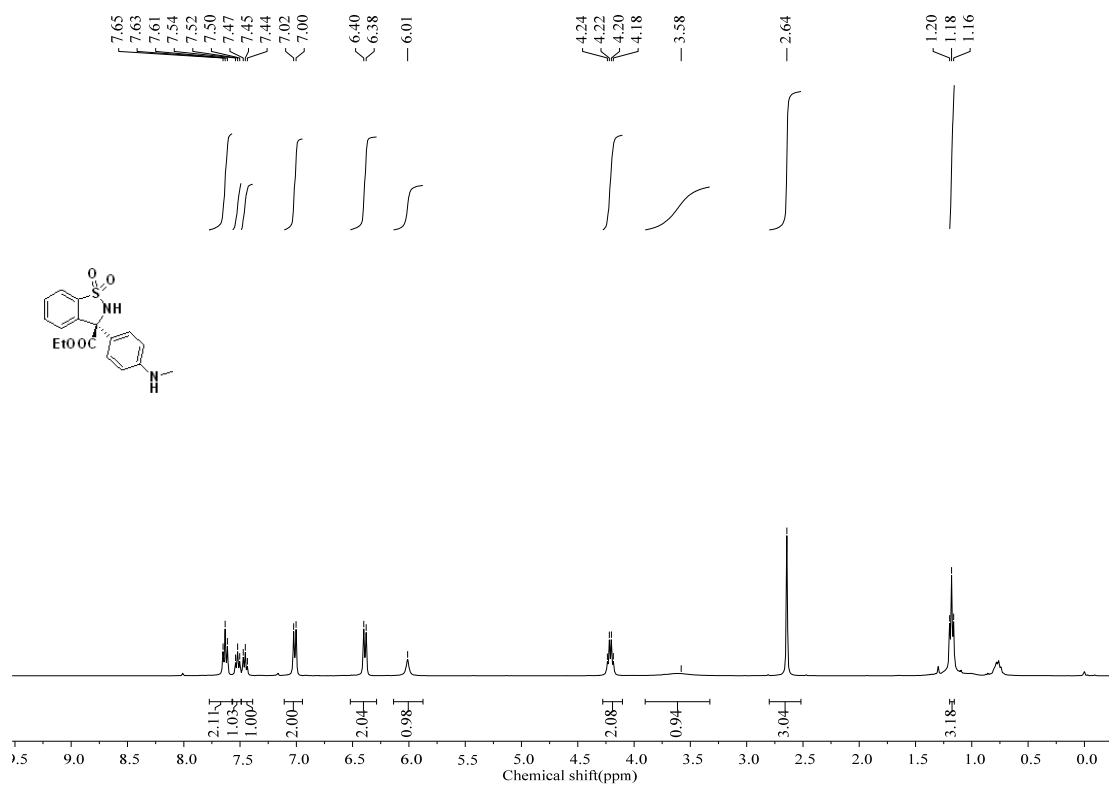

**3bp**  $^{13}\text{C}$   $\{^1\text{H}\}$  NMR (100 MHz,  $\text{CDCl}_3$ )

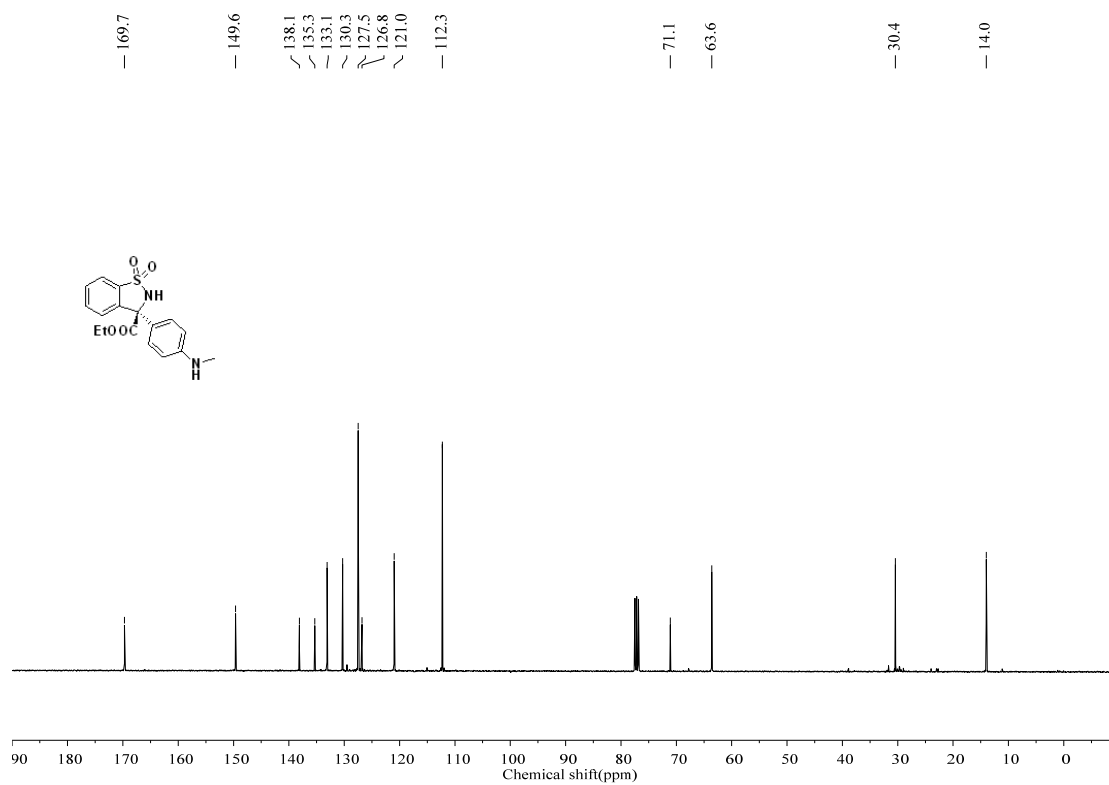

**3bq**  $^1\text{H}$  NMR (400 MHz,  $\text{CDCl}_3$ )

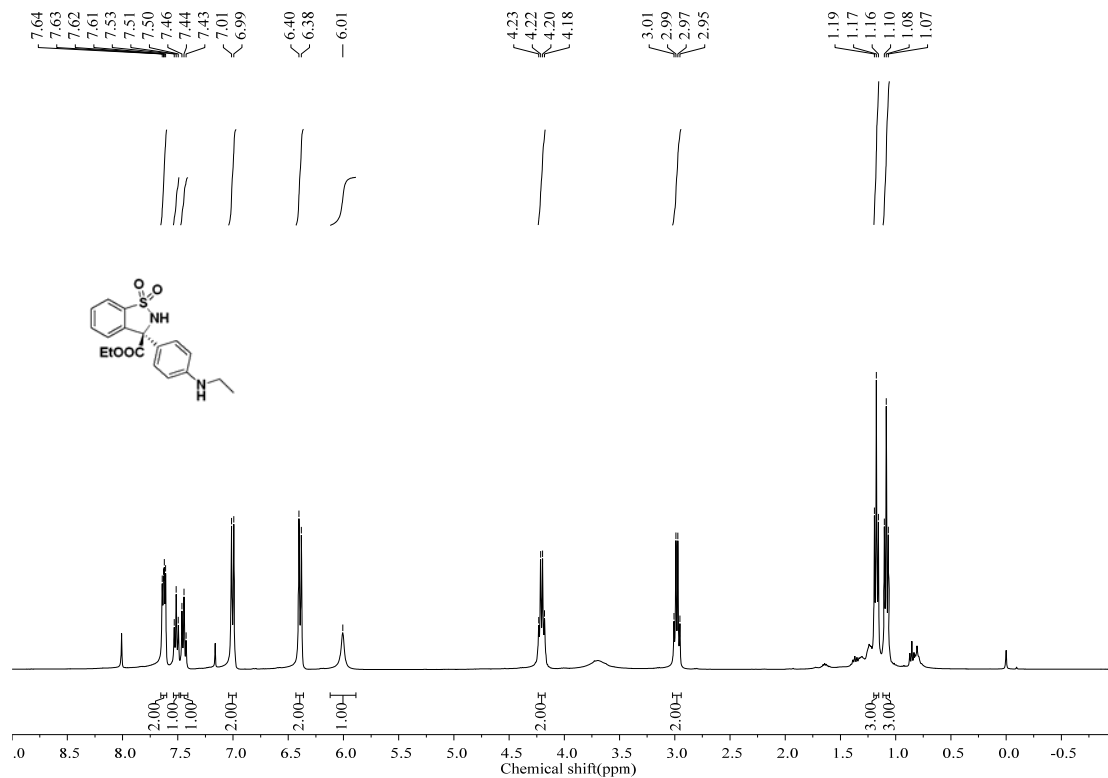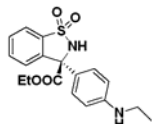

**3bq**  $^{13}\text{C}$   $\{^1\text{H}\}$  NMR (100 MHz,  $\text{CDCl}_3$ )

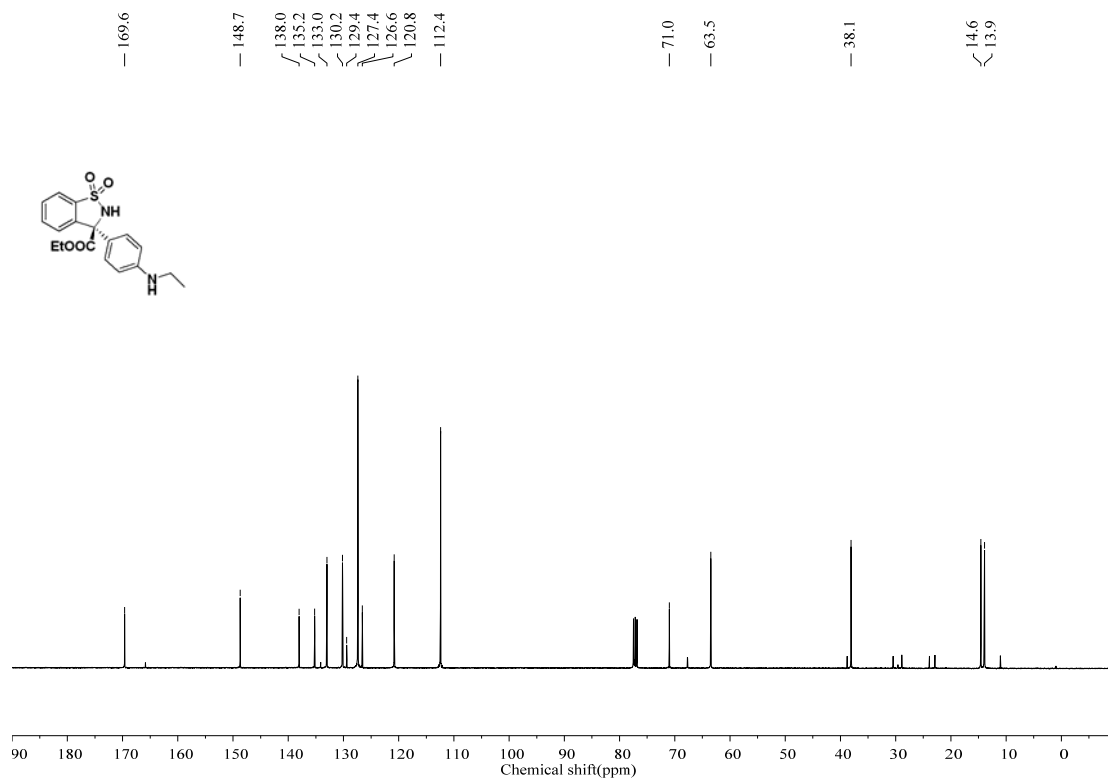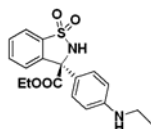

**3br**  $^1\text{H}$  NMR (400 MHz,  $\text{CDCl}_3$ )

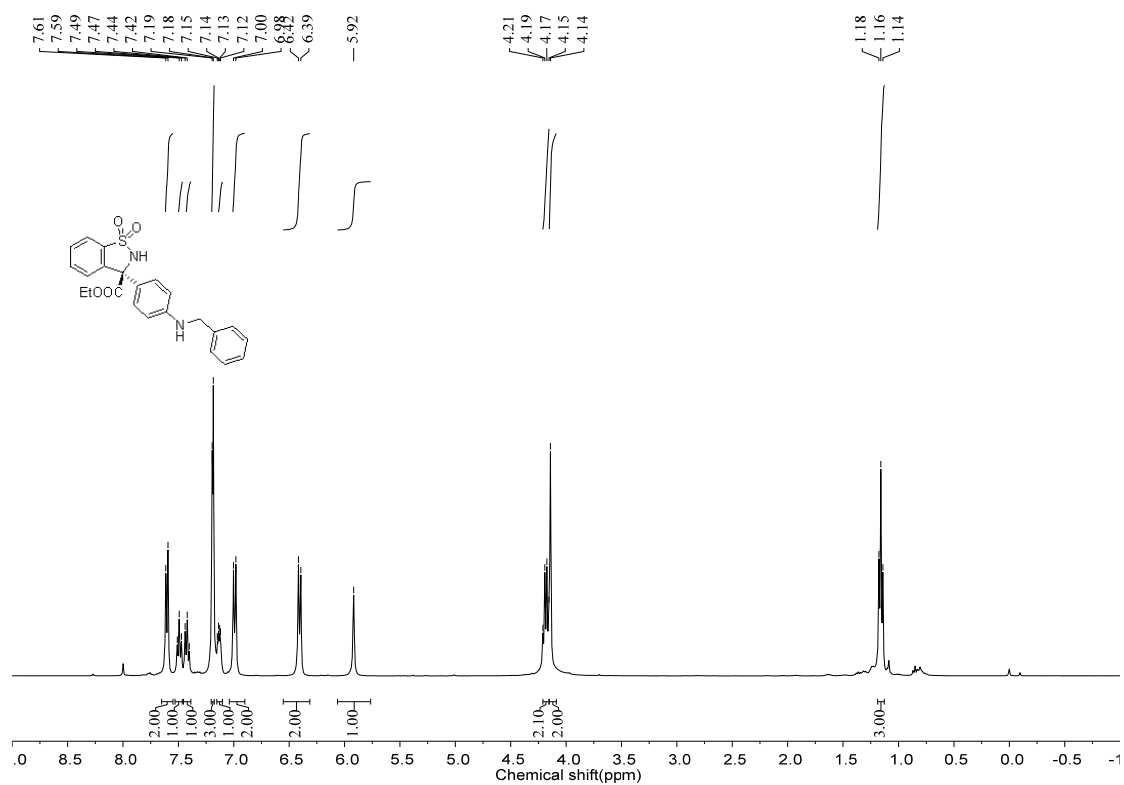

**3br**  $^{13}\text{C}$   $\{^1\text{H}\}$  NMR (100 MHz,  $\text{CDCl}_3$ )

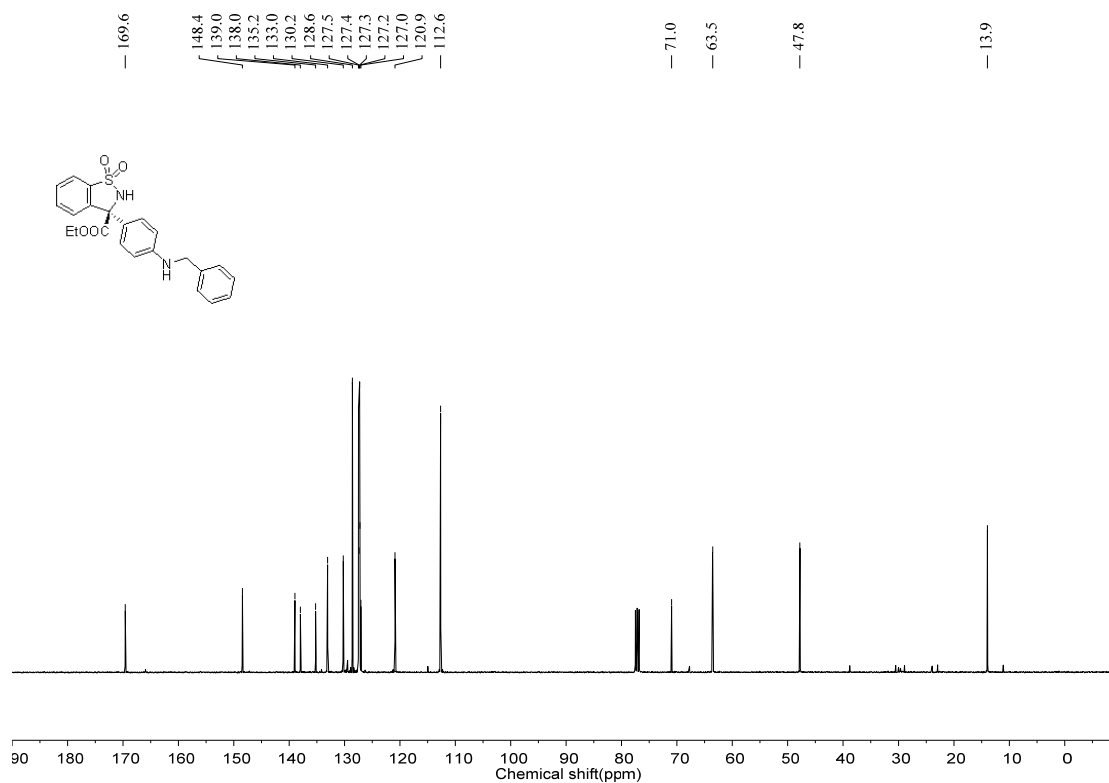

**3bs**  $^1\text{H}$  NMR (400 MHz,  $\text{CDCl}_3$ )

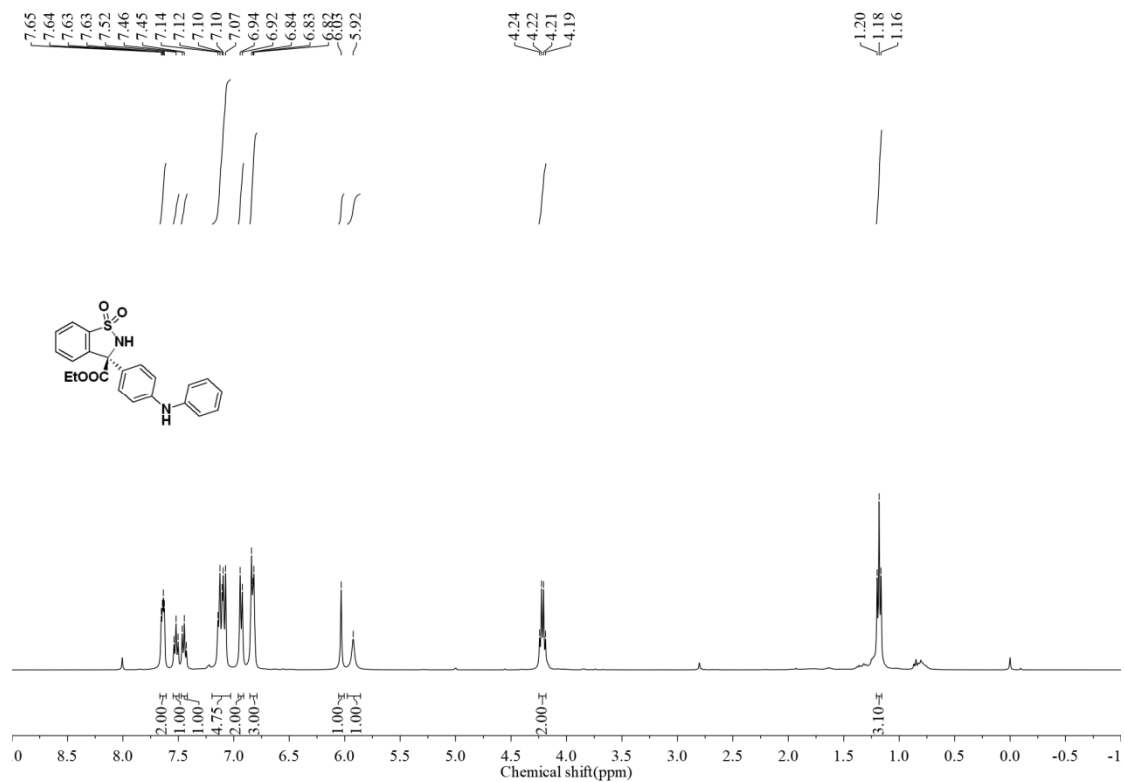

**3bs**  $^{13}\text{C}$   $\{^1\text{H}\}$  NMR (100 MHz,  $\text{CDCl}_3$ )

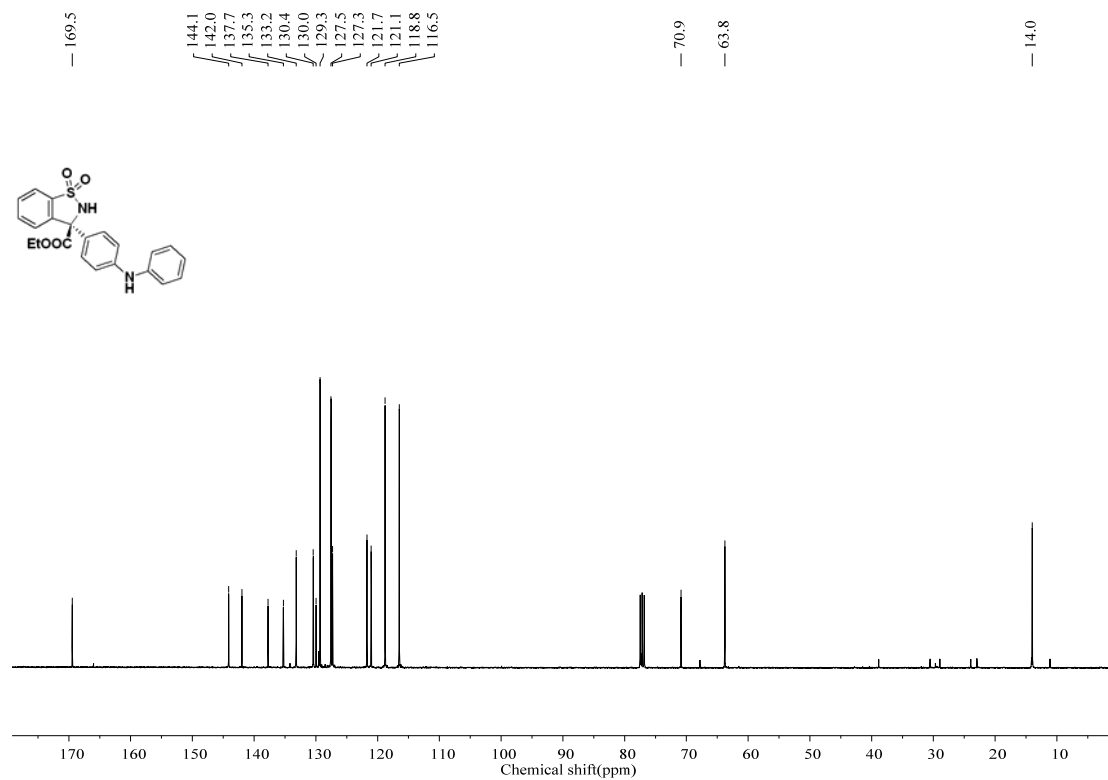



**3bt**  $^1\text{H}$  NMR (400 MHz,  $\text{CDCl}_3$ )

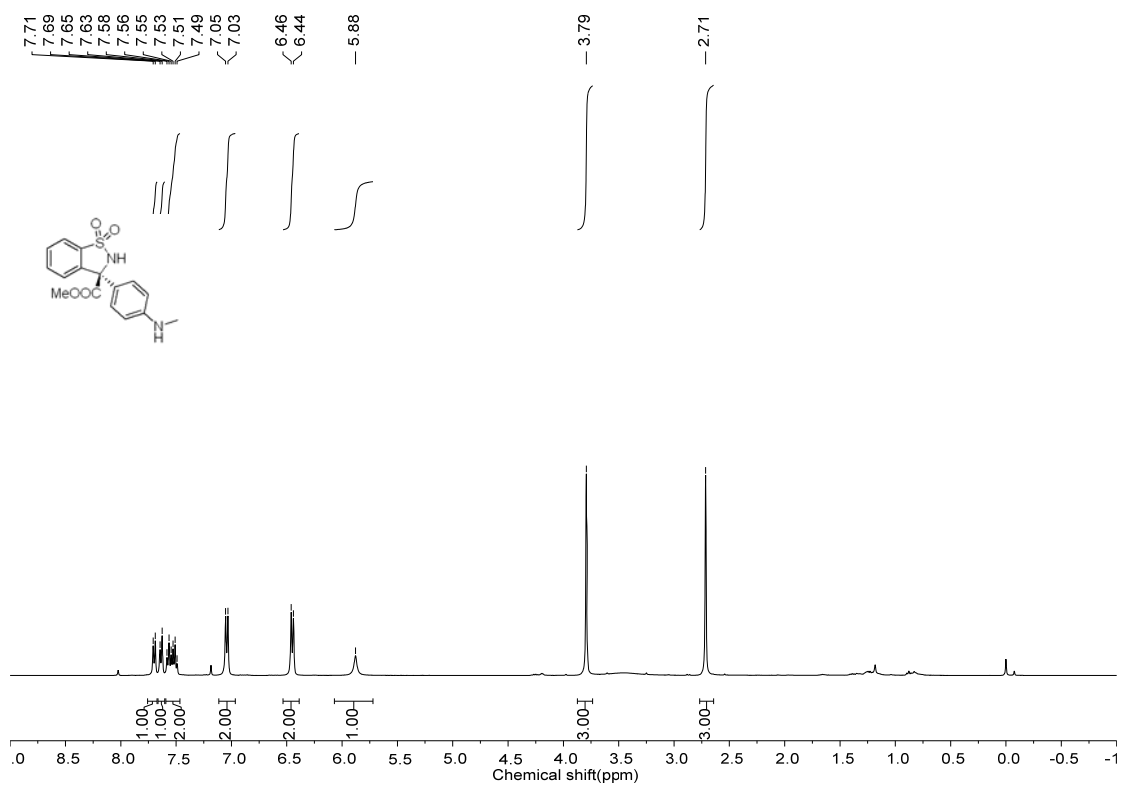

**3bt**  $^{13}\text{C}$   $\{^1\text{H}\}$  NMR (100 MHz,  $\text{CDCl}_3$ )

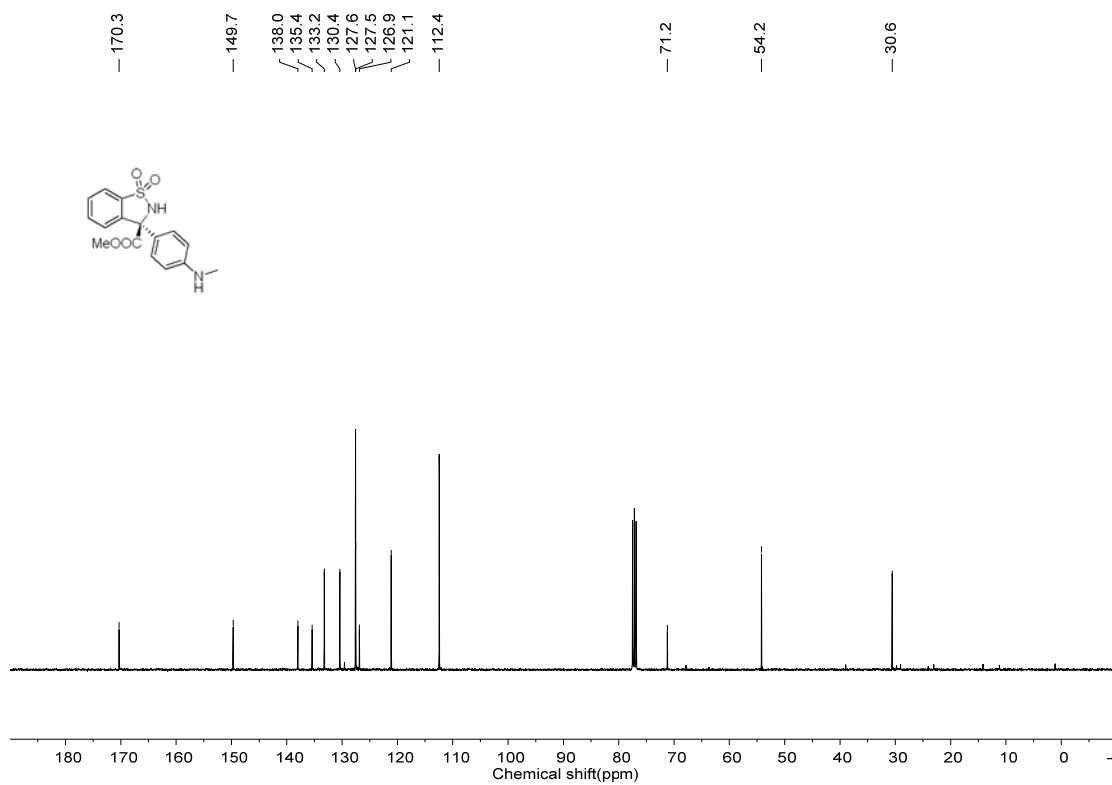

**4**  $^1\text{H}$  NMR (400 MHz,  $\text{CDCl}_3$ )

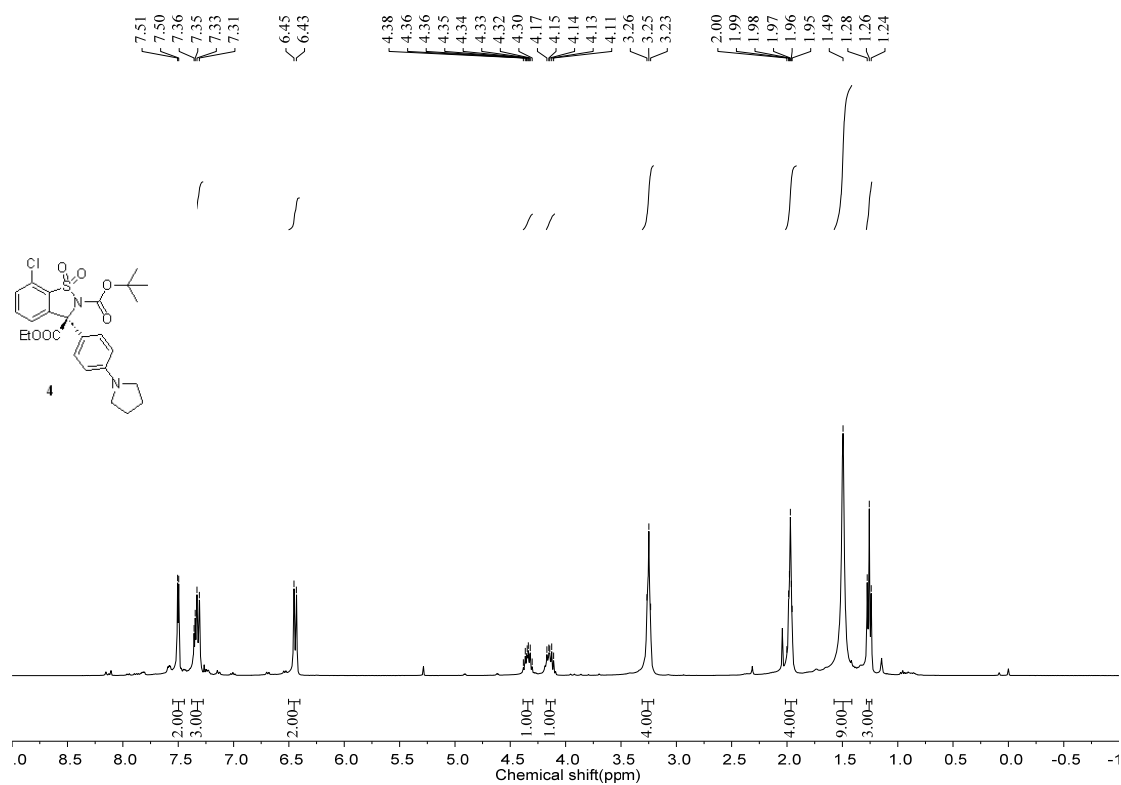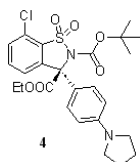

**4**  $^{13}\text{C}$   $\{^1\text{H}\}$  NMR (100 MHz,  $\text{CDCl}_3$ )

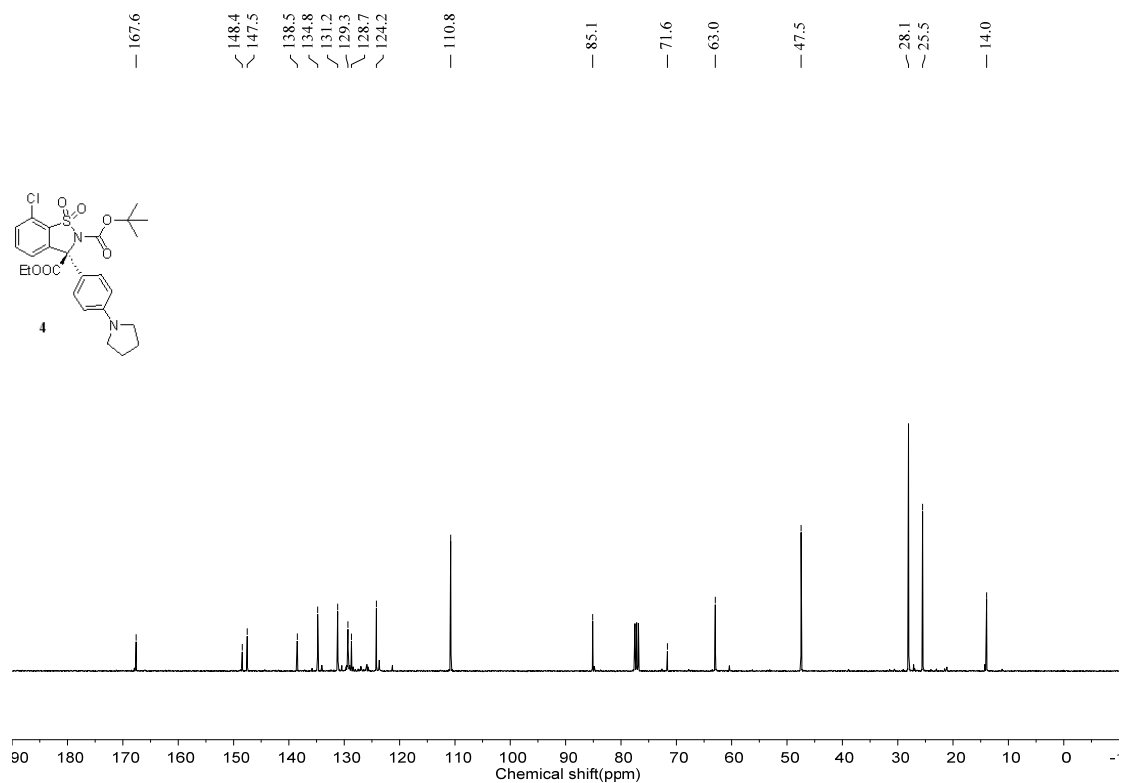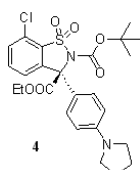

**5**  $^1\text{H}$  NMR (400 MHz,  $\text{CDCl}_3$ )

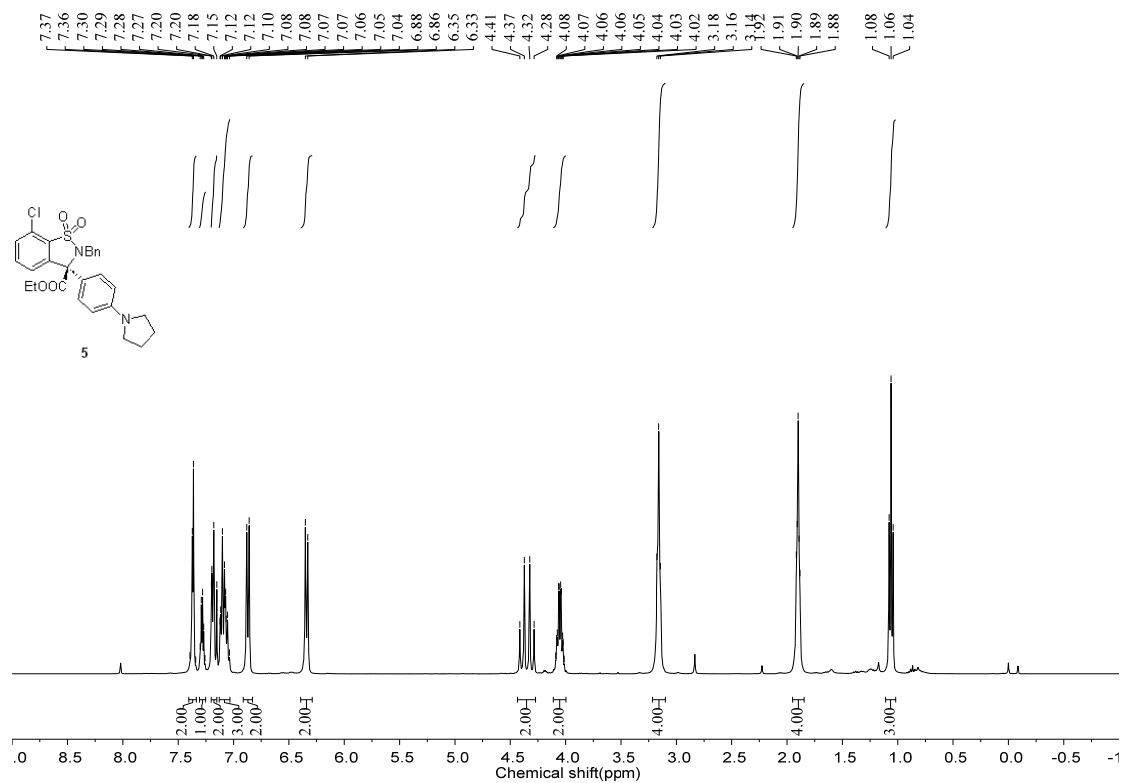

**5**  $^{13}\text{C}$   $\{^1\text{H}\}$  NMR (100 MHz,  $\text{CDCl}_3$ )

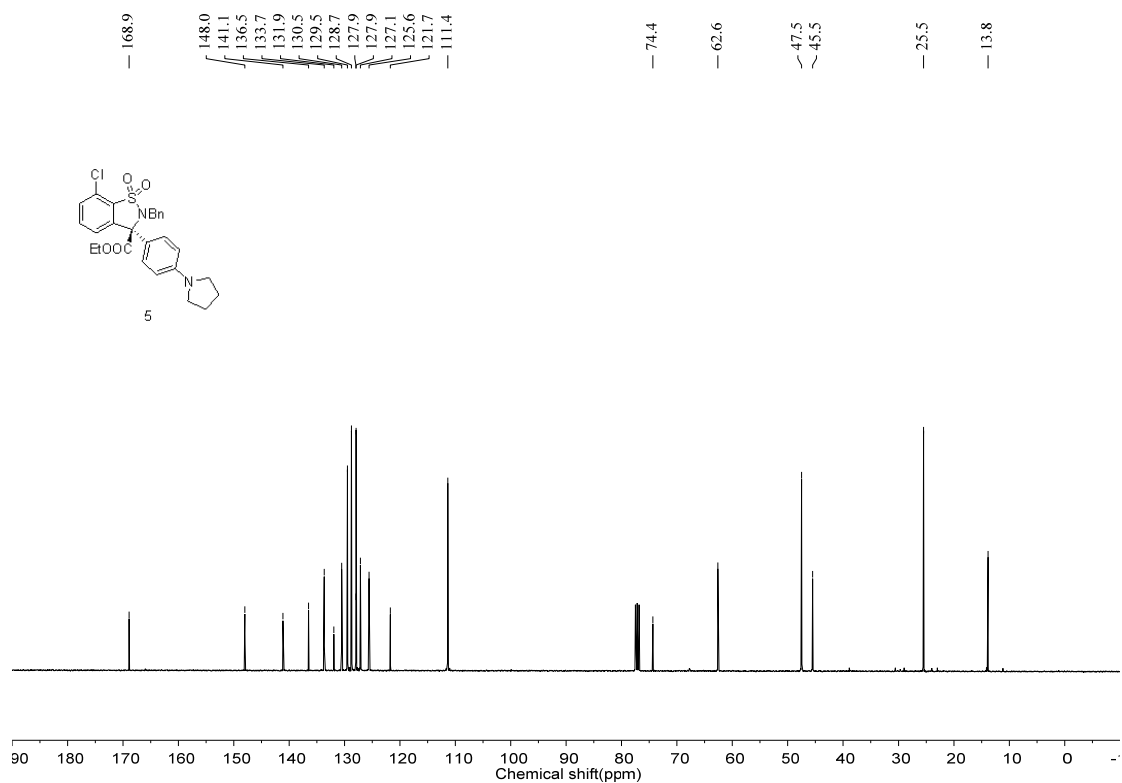

**6**  $^1\text{H}$  NMR (400 MHz,  $\text{CDCl}_3$ )

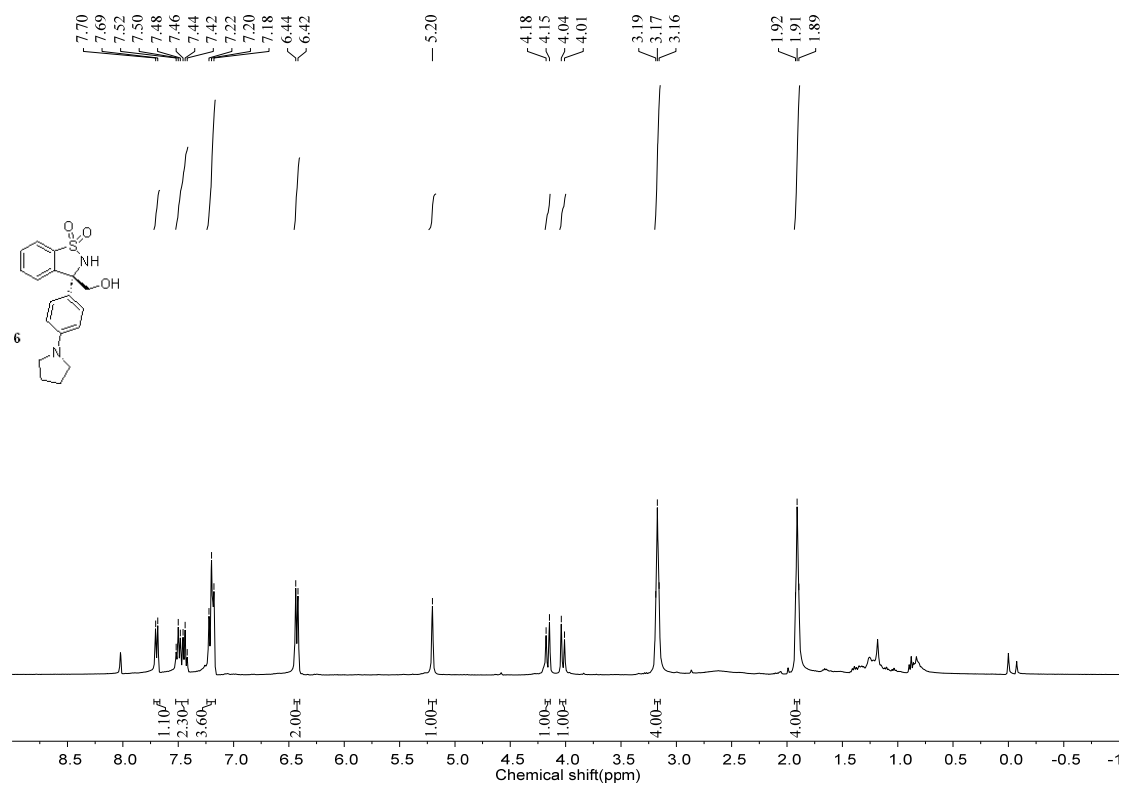

**6**  $^{13}\text{C}$   $\{^1\text{H}\}$  NMR (100 MHz,  $\text{CDCl}_3$ )

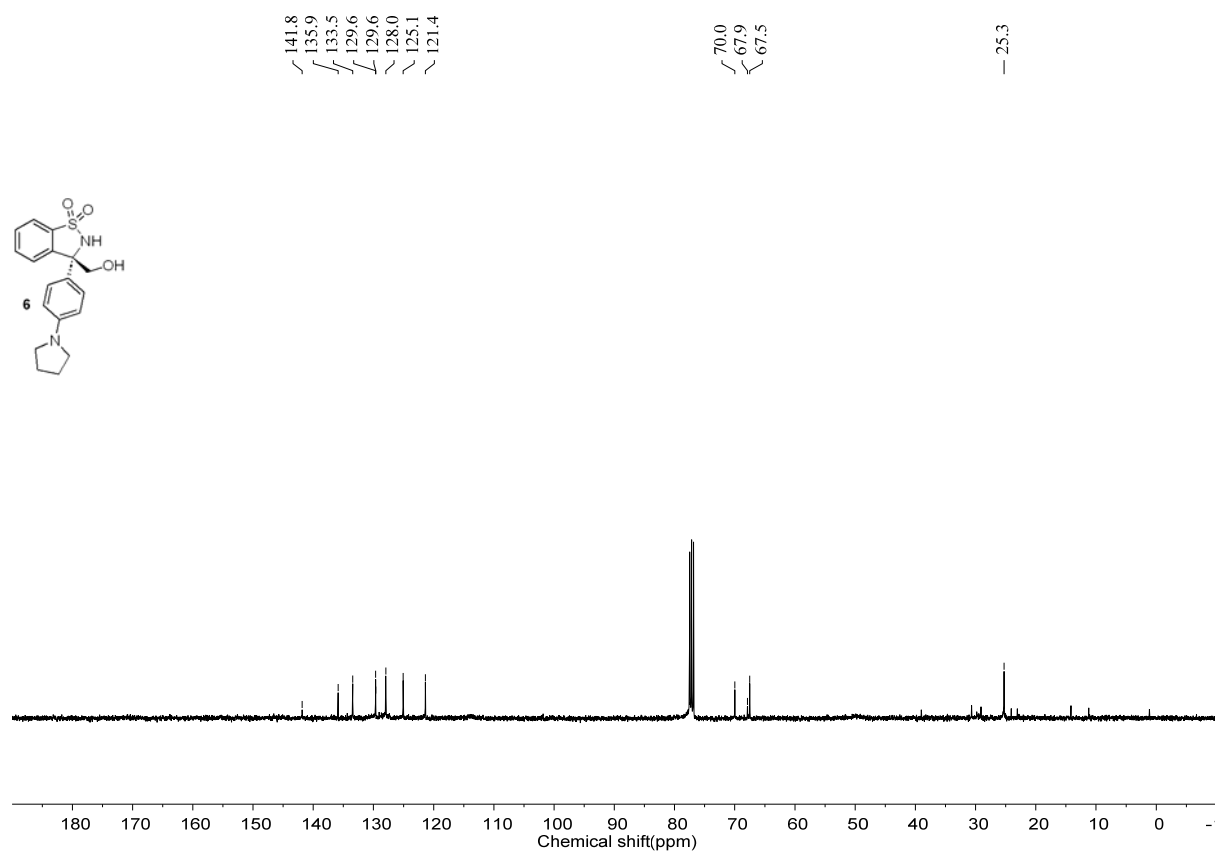

**L1**  $^1\text{H}$  NMR (400 MHz,  $\text{CDCl}_3$ )

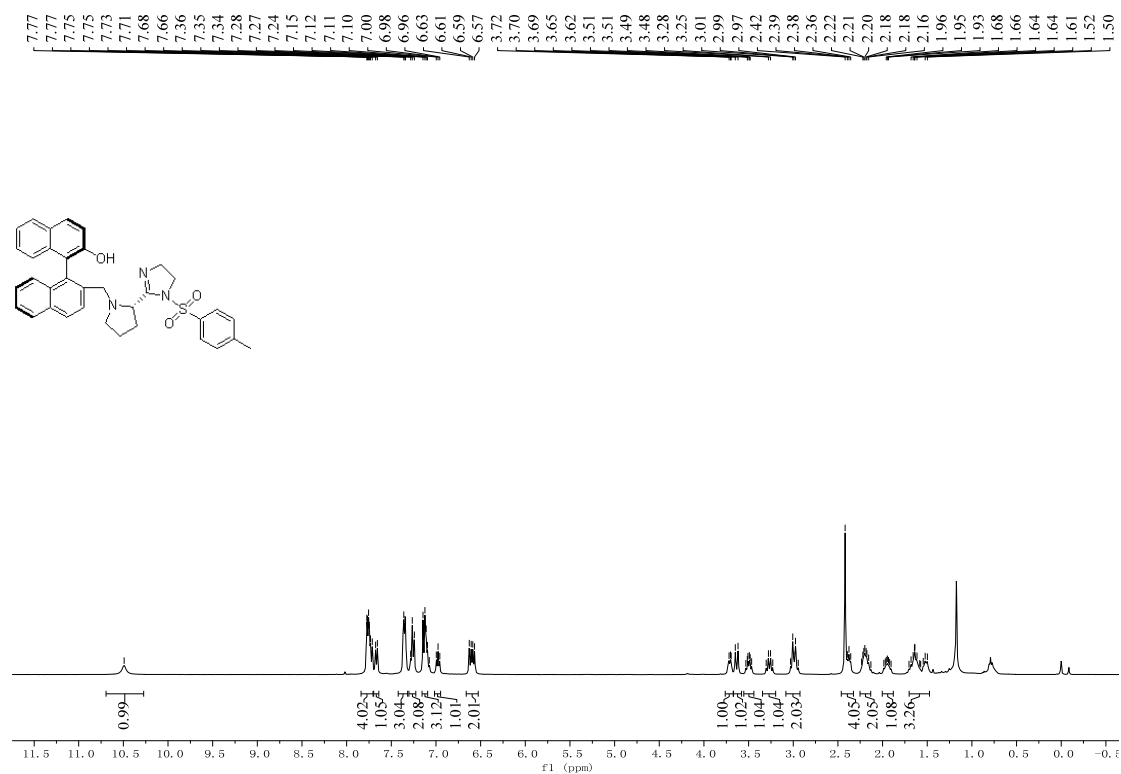

**L1**  $^{13}\text{C}$   $\{^1\text{H}\}$  NMR (100 MHz,  $\text{CDCl}_3$ )

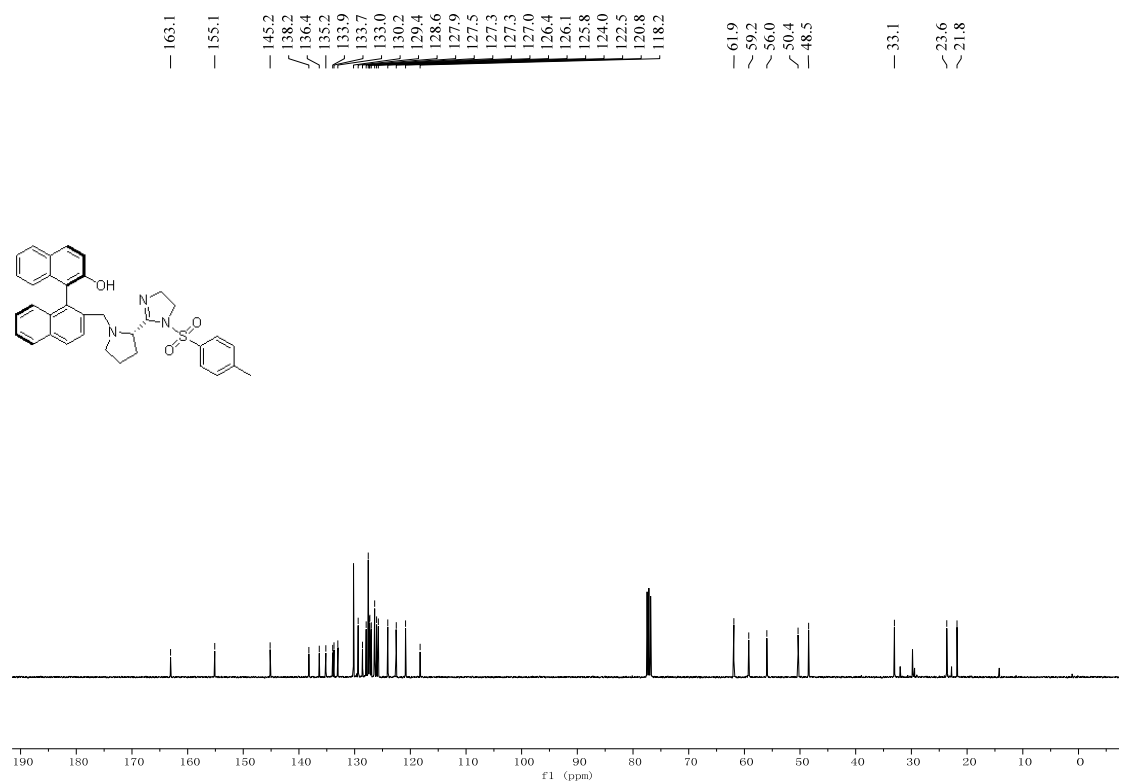

### L2 <sup>1</sup>H NMR (400 MHz, CDCl<sub>3</sub>)

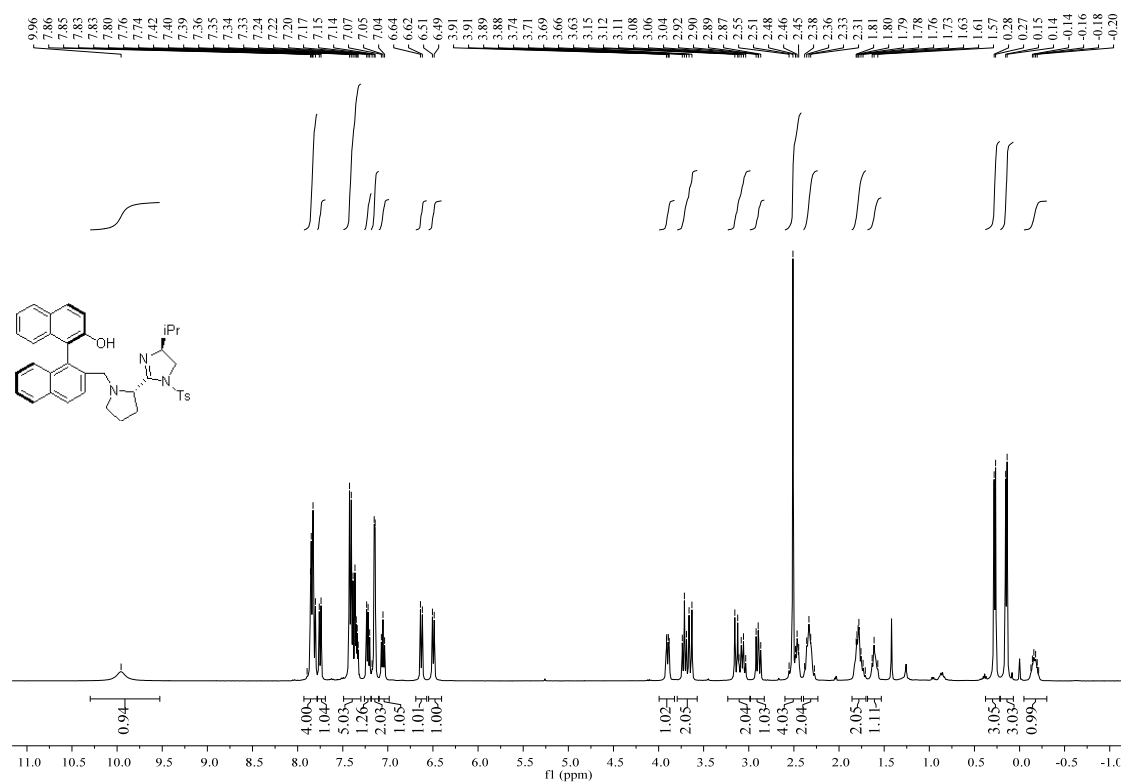

### L2 <sup>13</sup>C {<sup>1</sup>H} NMR (100 MHz, CDCl<sub>3</sub>)

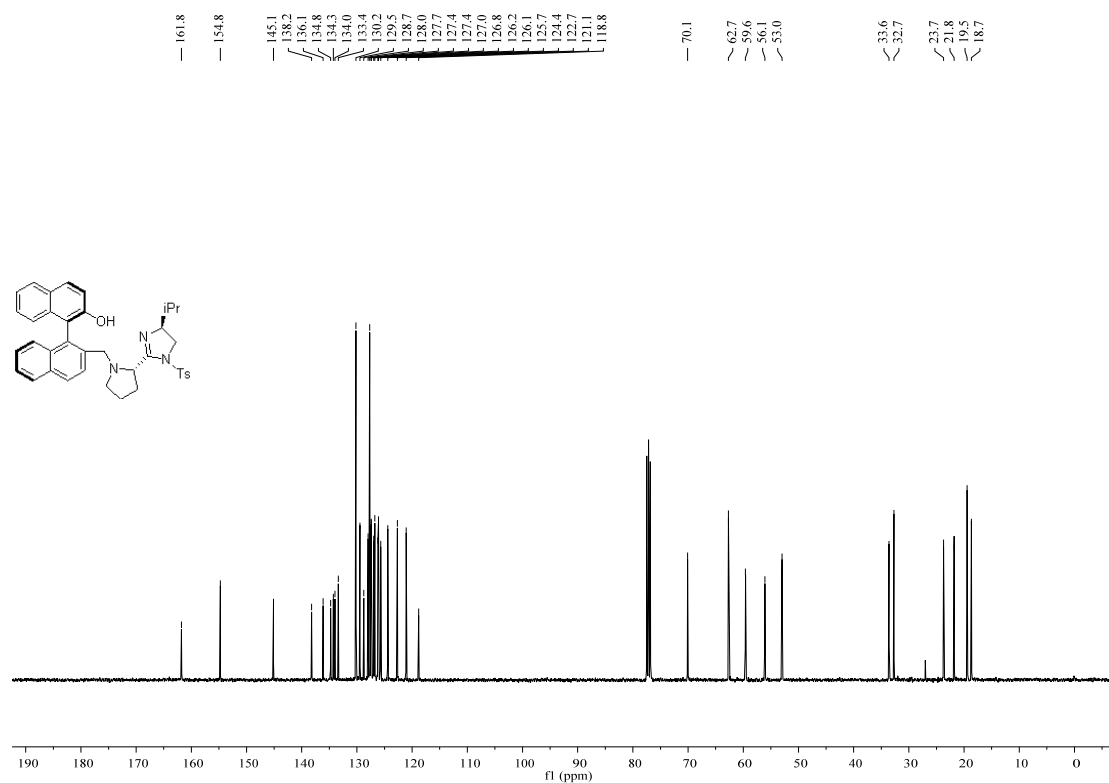

### L3 <sup>1</sup>H NMR (400 MHz, CDCl<sub>3</sub>)

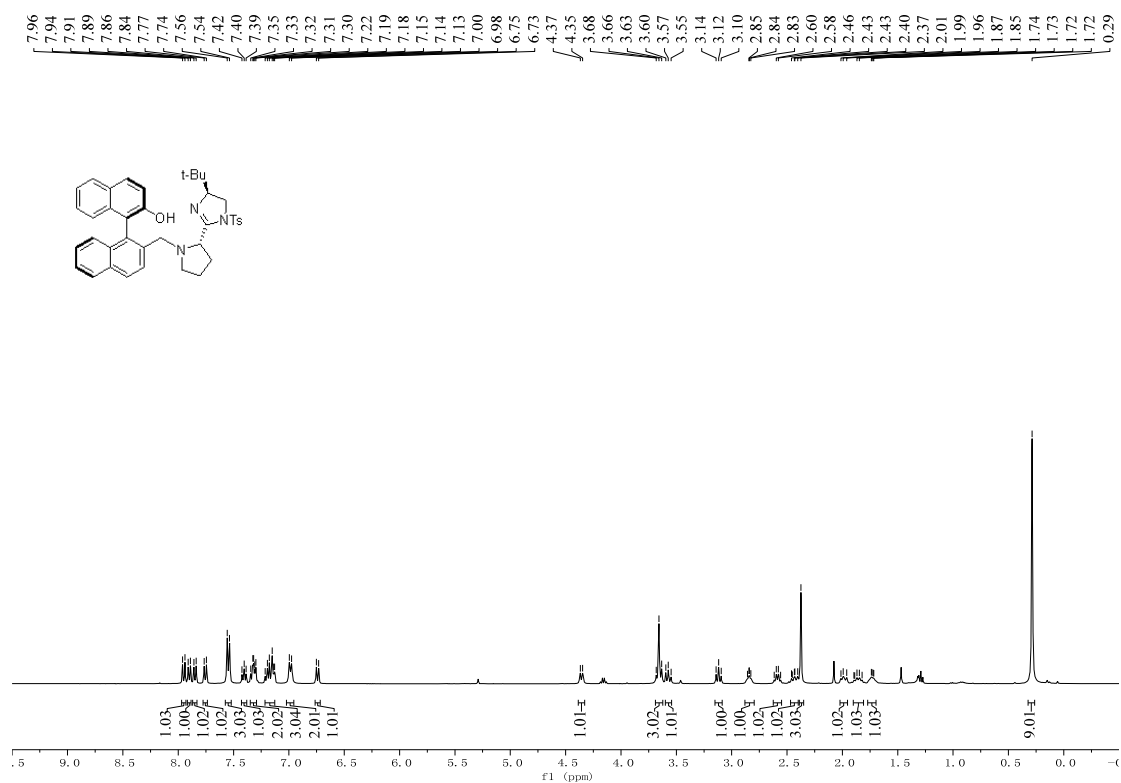

### L3 <sup>13</sup>C {<sup>1</sup>H} NMR (100 MHz, CDCl<sub>3</sub>)

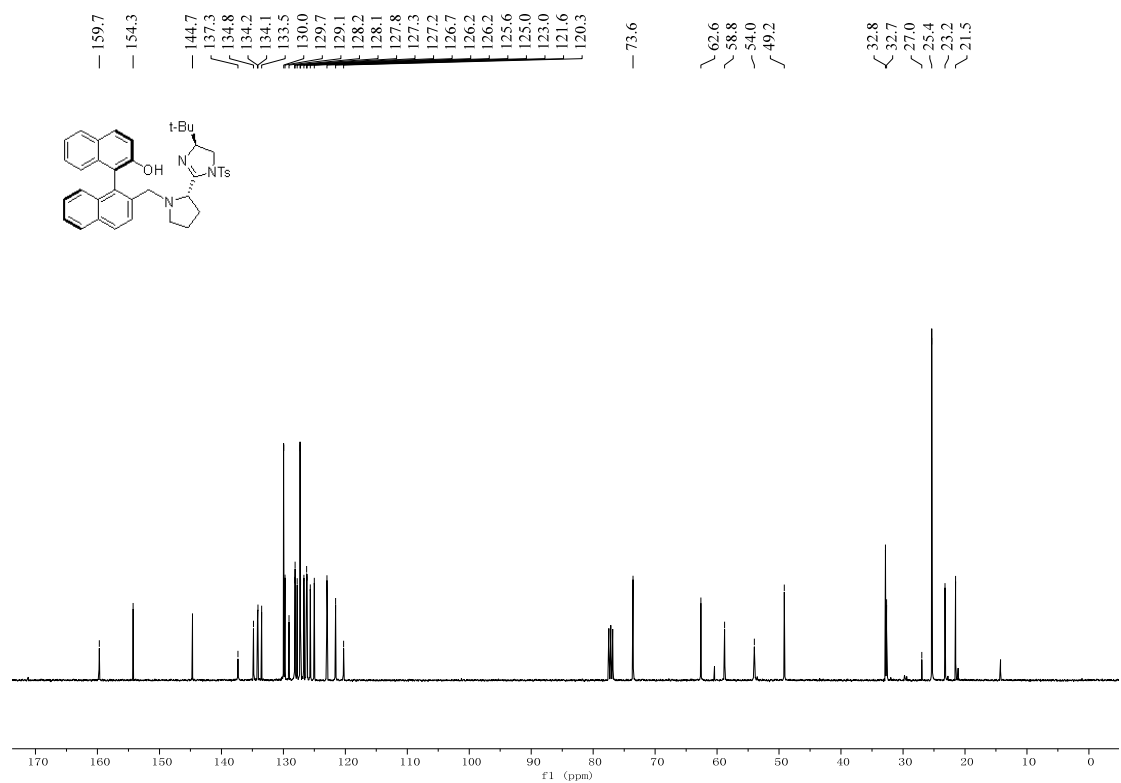

L4 <sup>1</sup>H NMR (400 MHz, CDCl<sub>3</sub>)

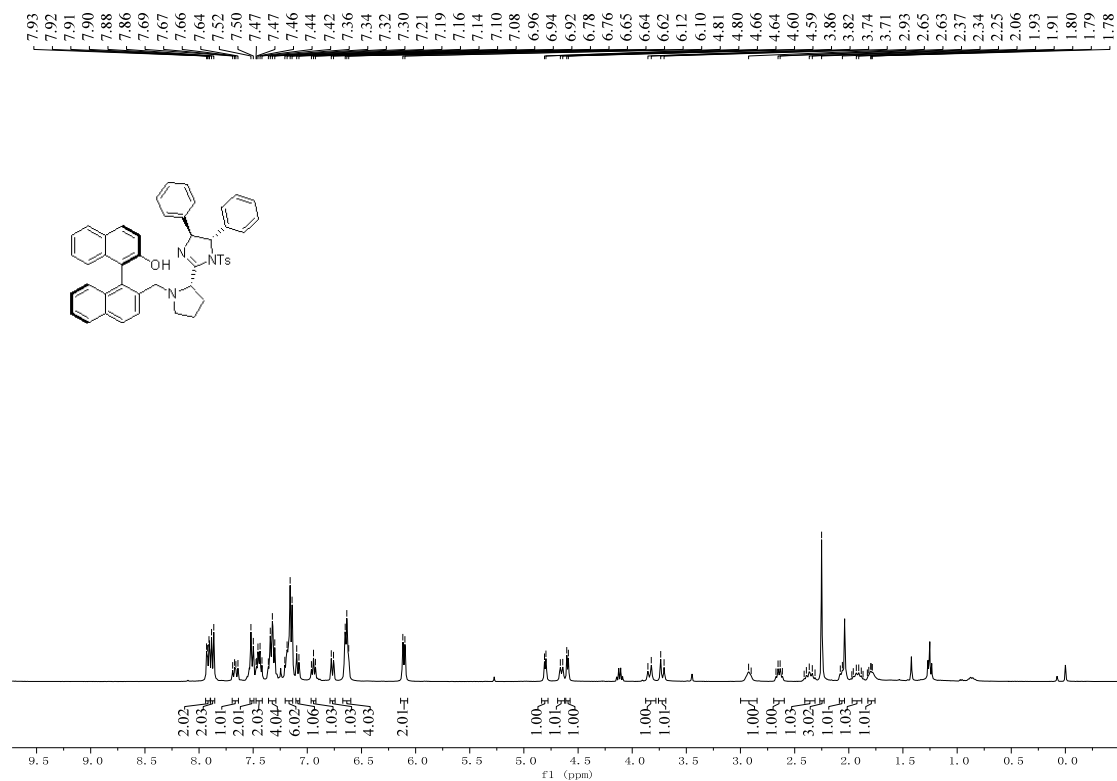

L4 <sup>13</sup>C {<sup>1</sup>H} NMR (100 MHz, CDCl<sub>3</sub>)

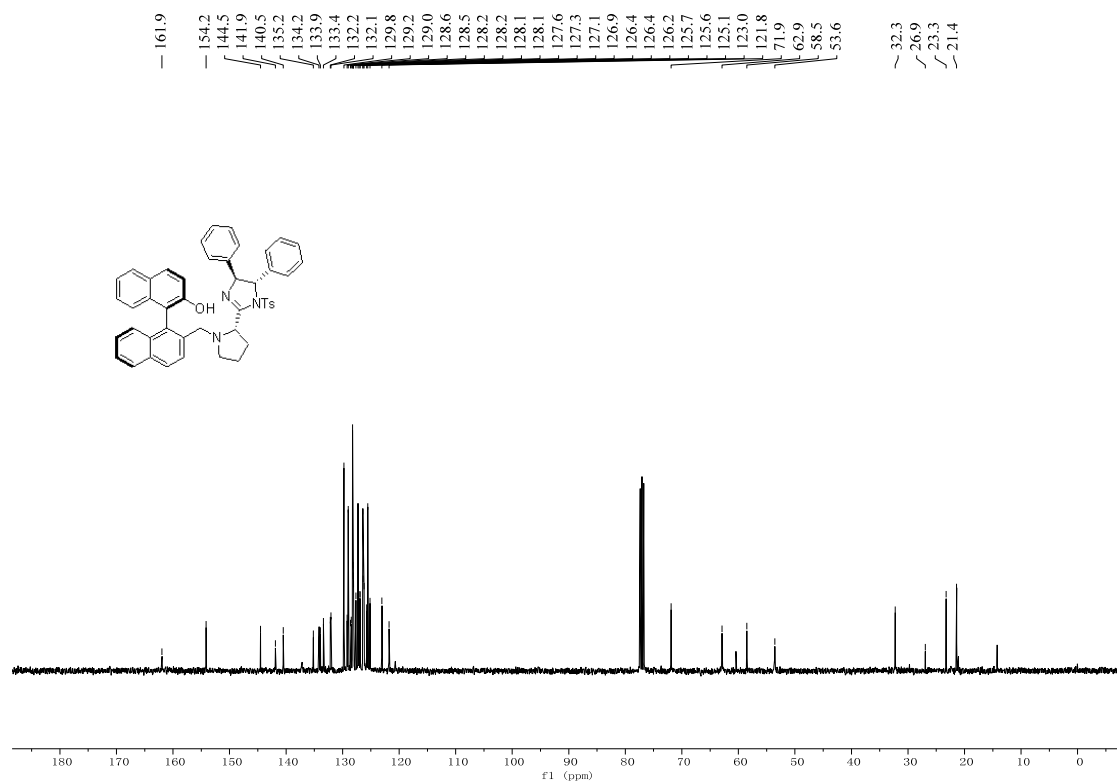



**L5**  $^1\text{H}$  NMR (400 MHz,  $\text{CDCl}_3$ )

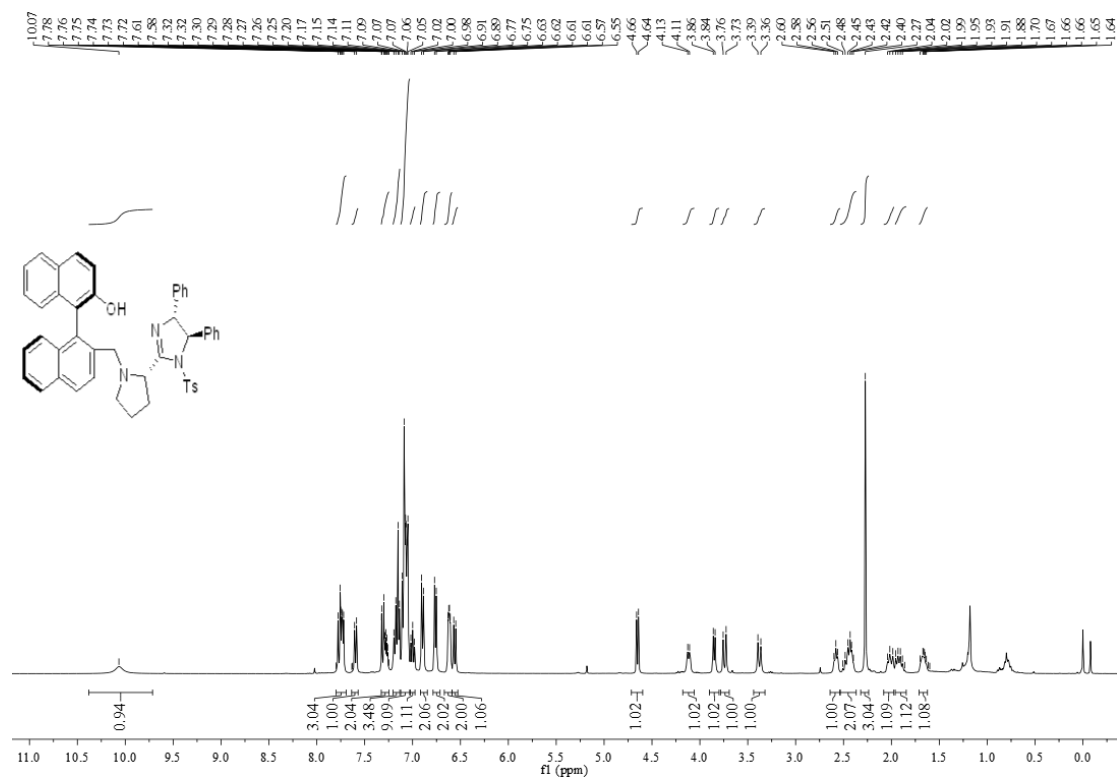

**L5**  $^{13}\text{C}$   $\{^1\text{H}\}$  NMR (100 MHz,  $\text{CDCl}_3$ )

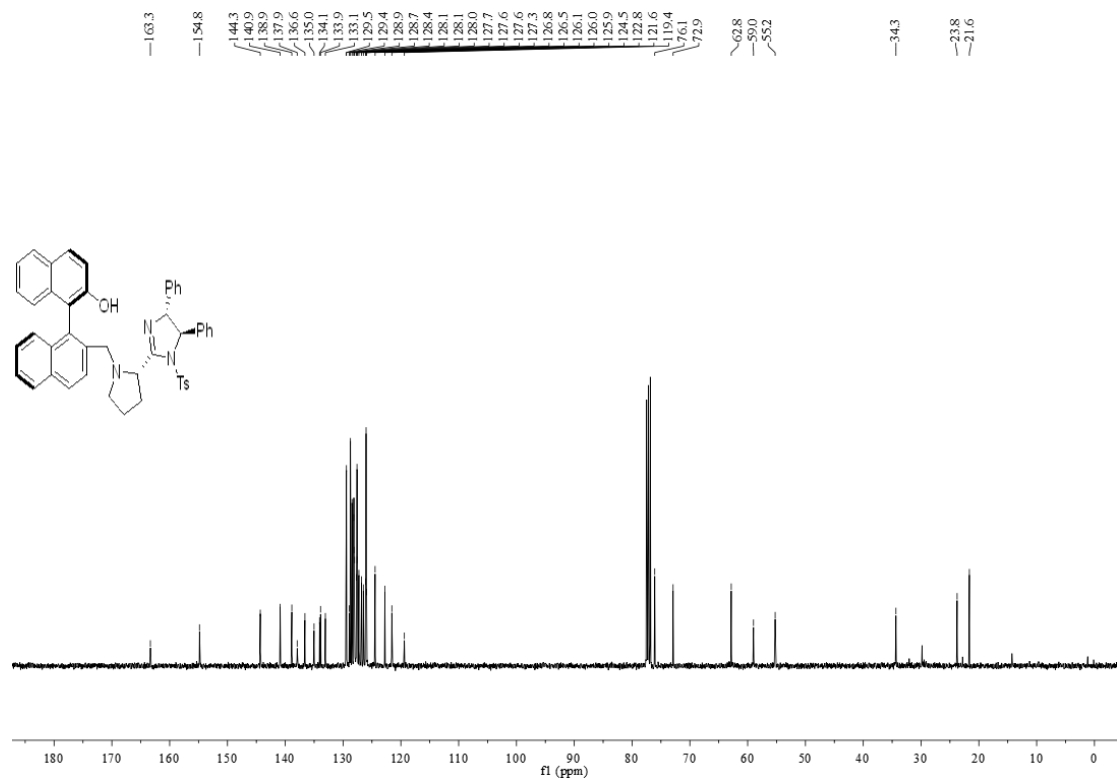



### L7 <sup>1</sup>H NMR (400 MHz, CDCl<sub>3</sub>)

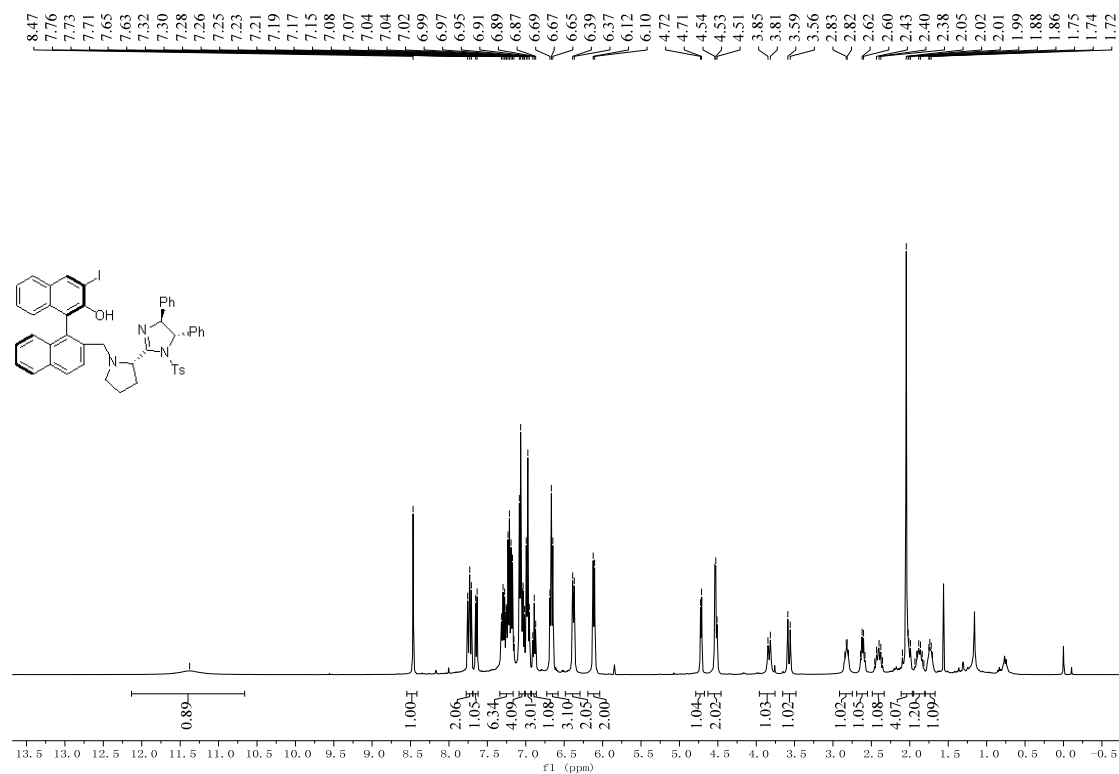

### L7 <sup>13</sup>C {<sup>1</sup>H} NMR (100 MHz, CDCl<sub>3</sub>)

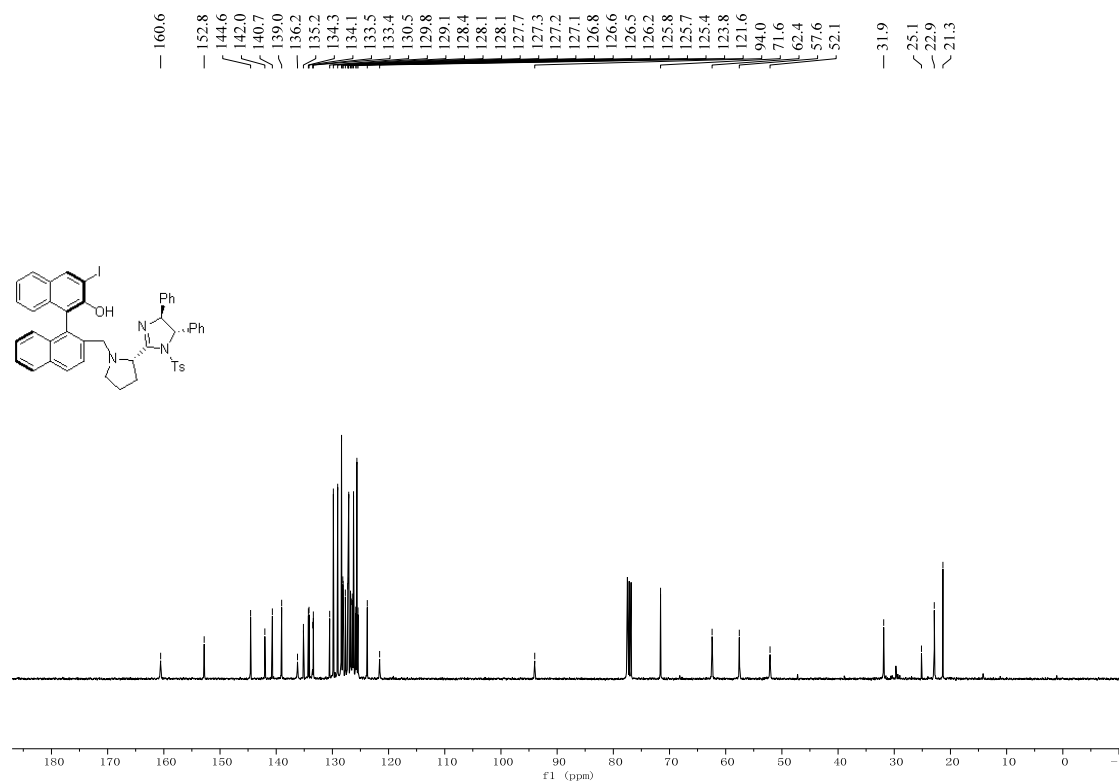

**L8**  $^1\text{H}$  NMR (400 MHz,  $\text{CDCl}_3$ )

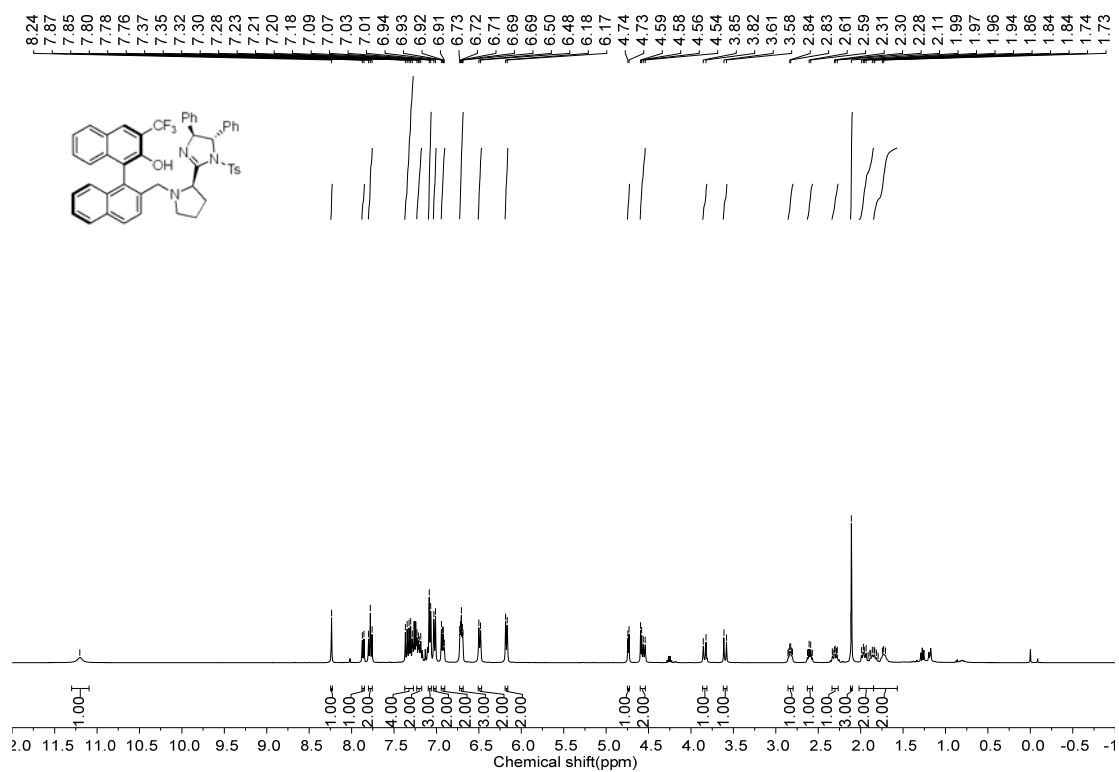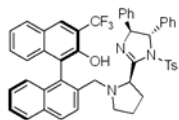

**L8**  $^{13}\text{C}$   $\{^1\text{H}\}$  NMR (100 MHz,  $\text{CDCl}_3$ )

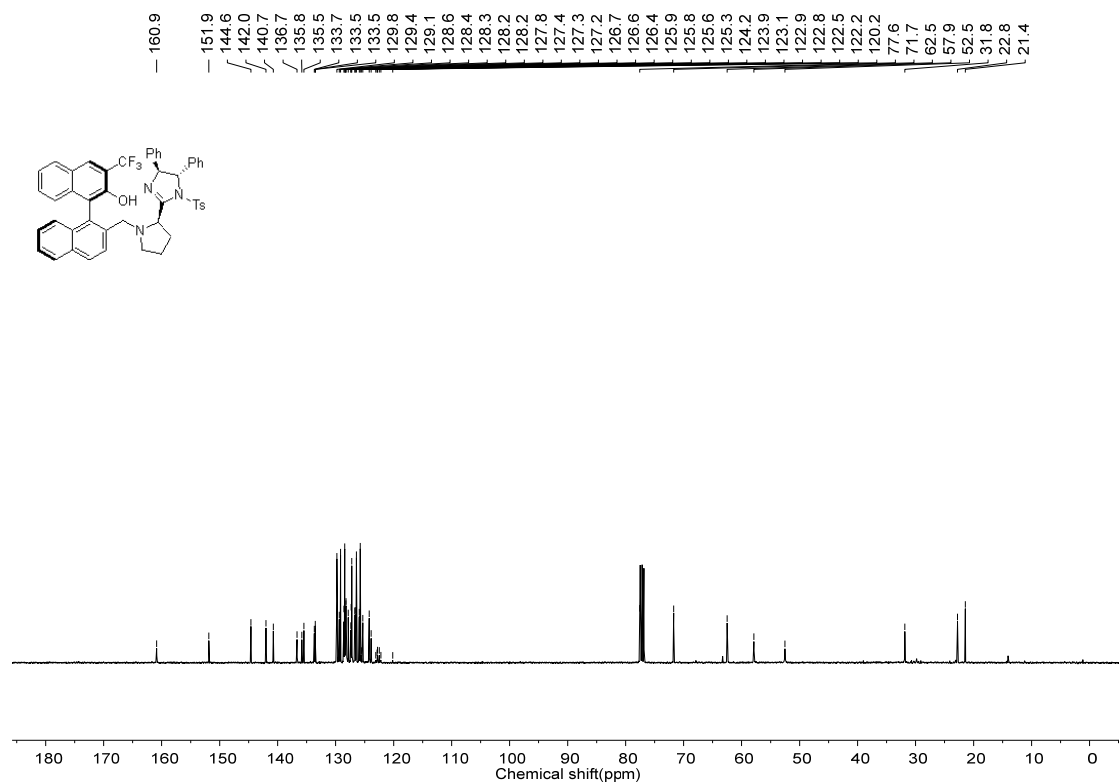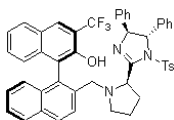

**L8**  $^{19}\text{F}$  NMR ( $\text{CDCl}_3$ )

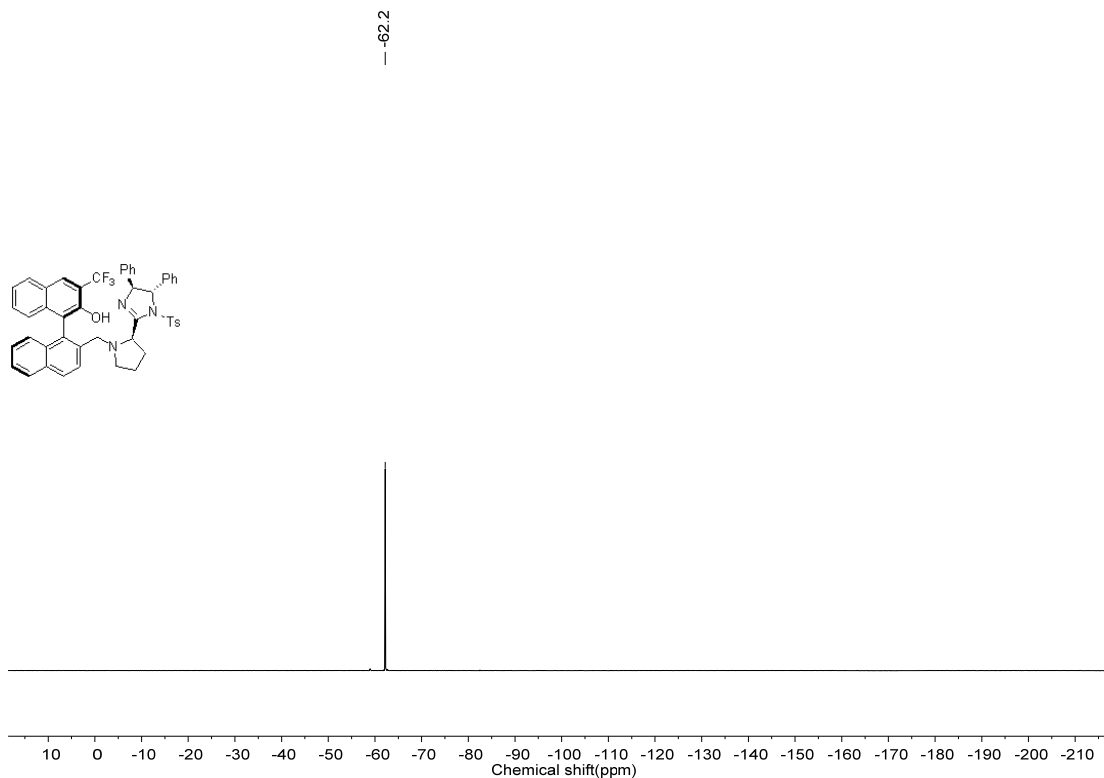

**L9**  $^1\text{H}$  NMR (400 MHz,  $\text{CDCl}_3$ )

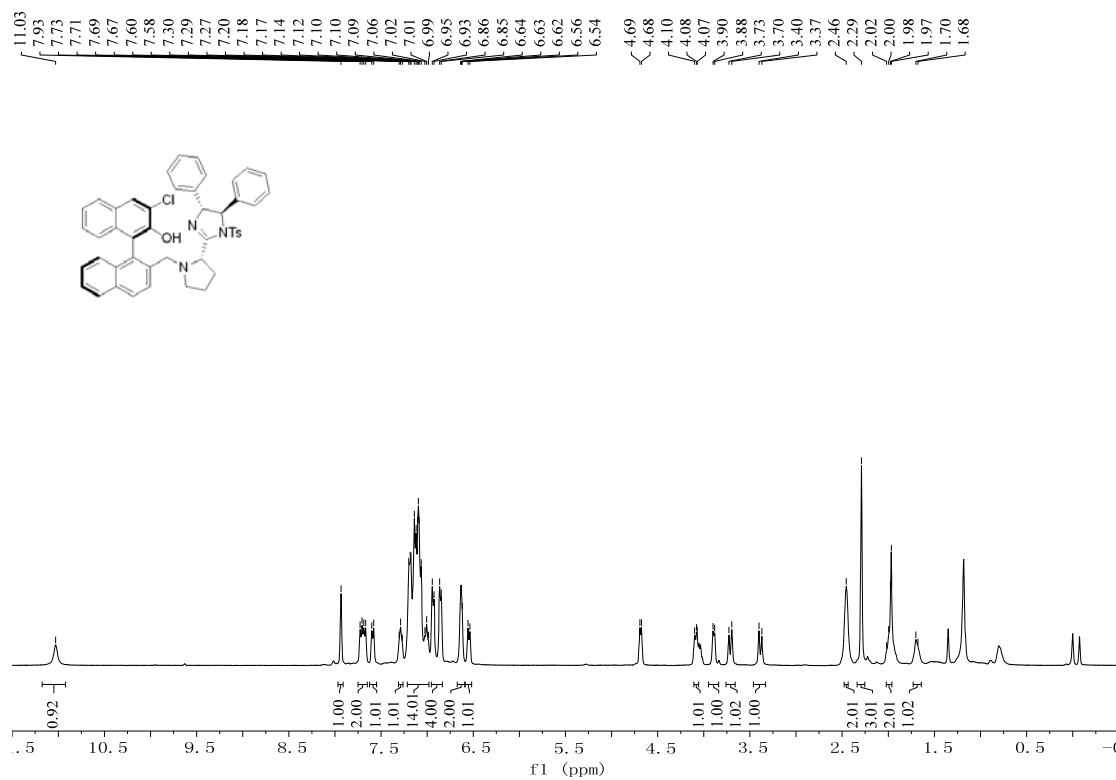

**L9**  $^{13}\text{C}\{^1\text{H}\}$  NMR (100 MHz,  $\text{CDCl}_3$ )

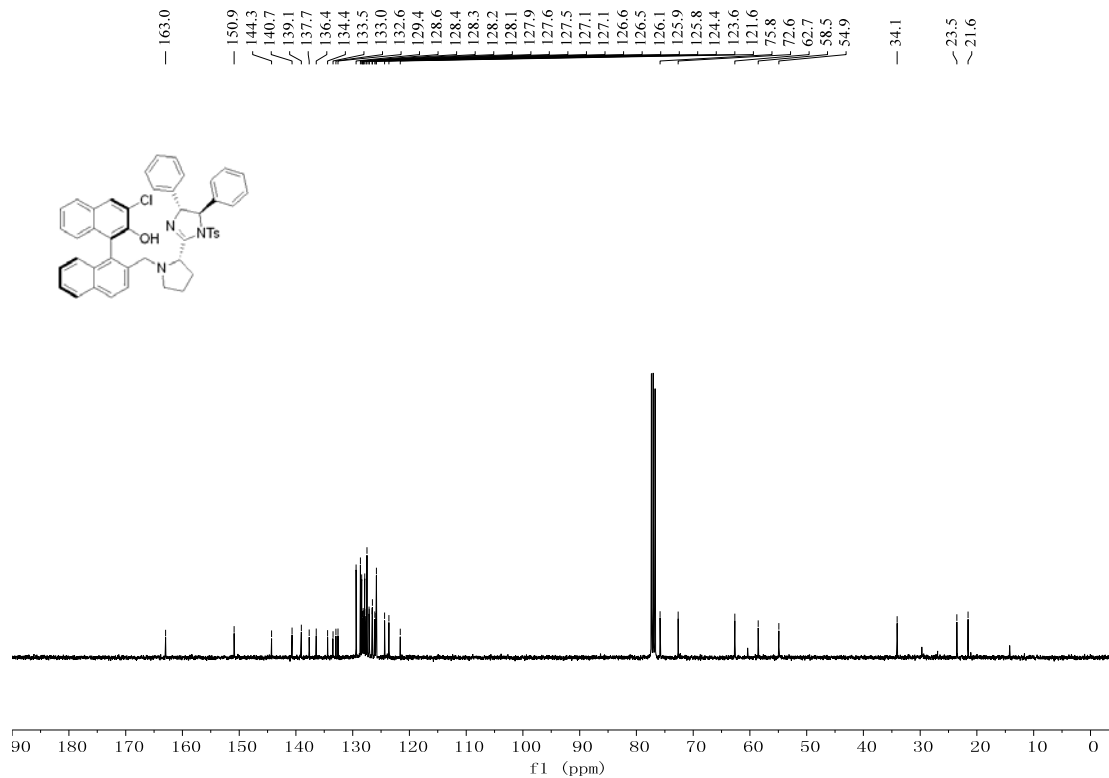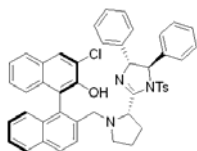

**L10**  $^1\text{H}$  NMR (400 MHz,  $\text{CDCl}_3$ )

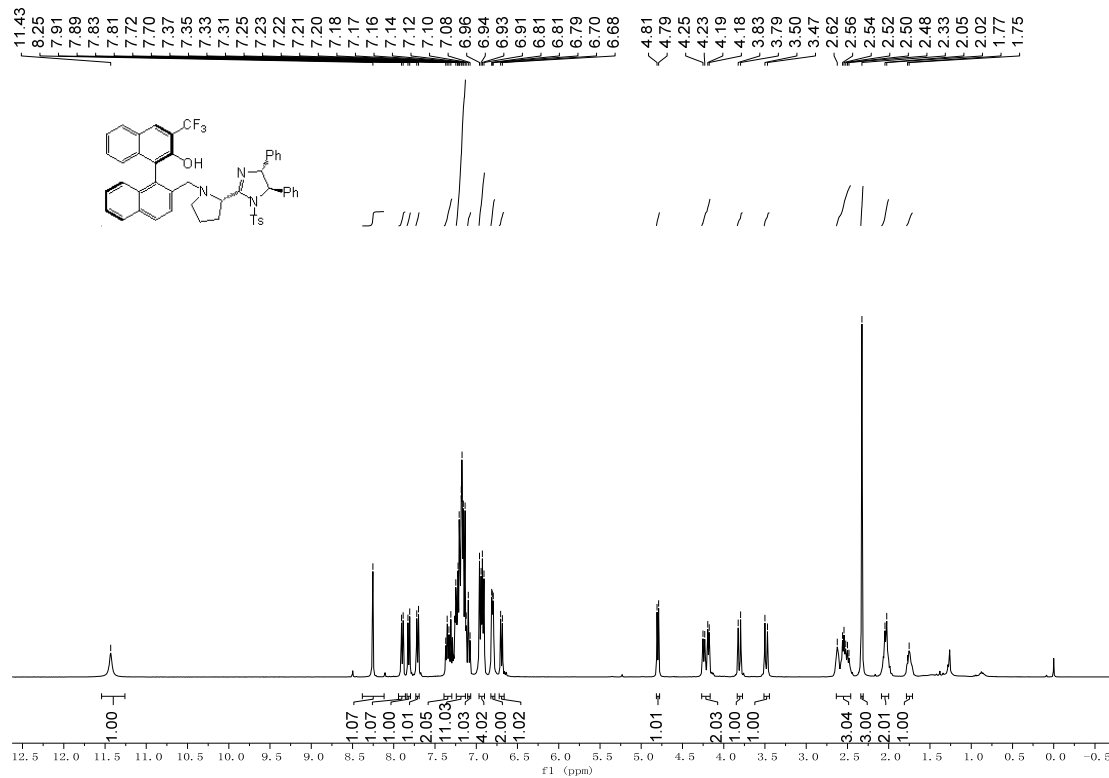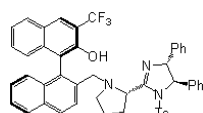

### L10 $^{13}\text{C}$ $\{^1\text{H}\}$ NMR (100 MHz, $\text{CDCl}_3$ )

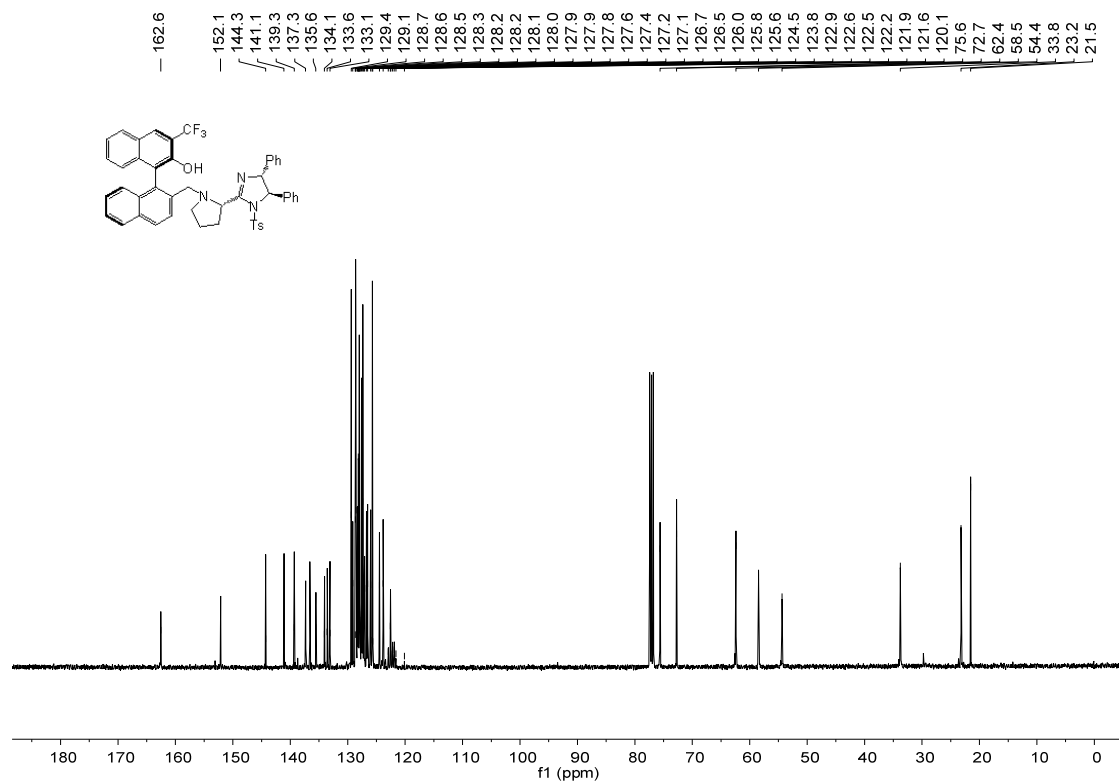

### L10 $^{19}\text{F}$ NMR ( $\text{CDCl}_3$ )

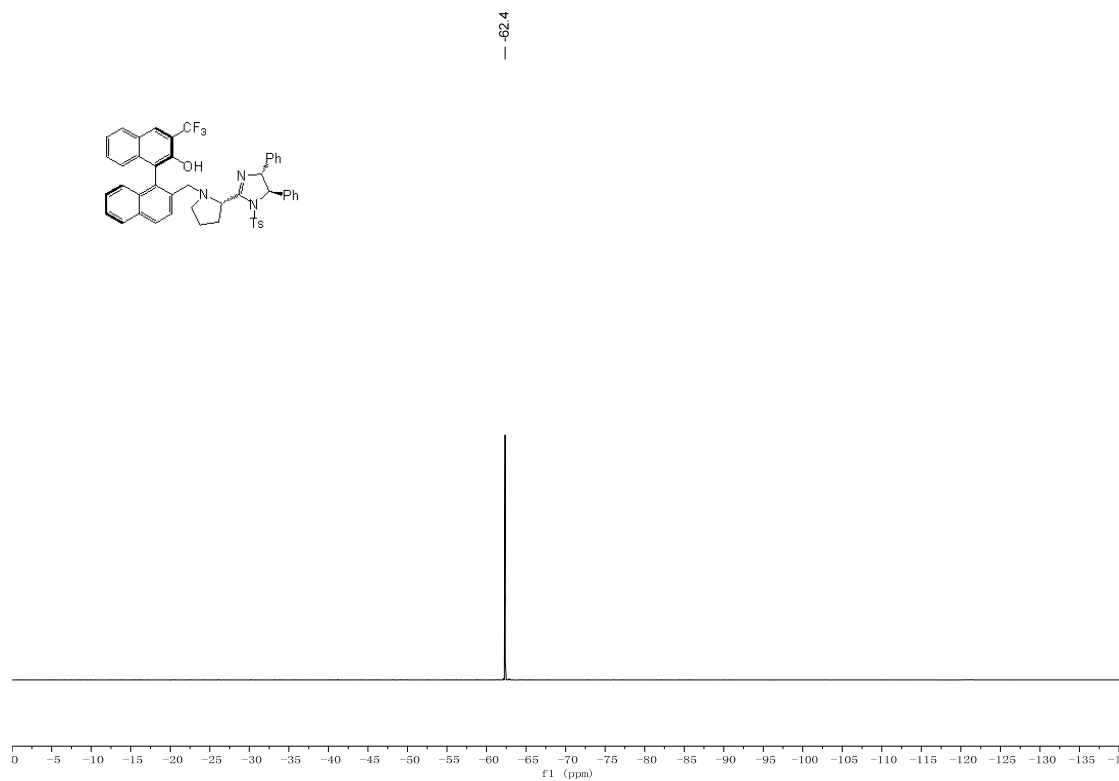

**L11**  $^1\text{H}$  NMR (400 MHz,  $\text{CDCl}_3$ )

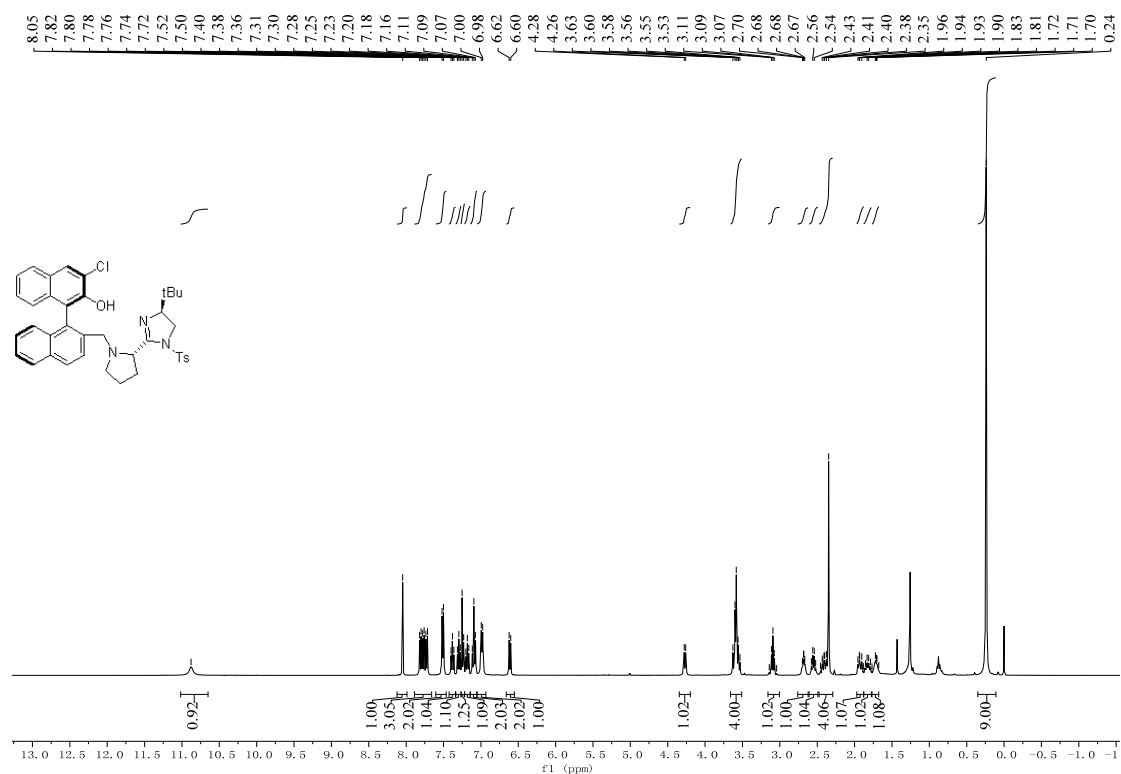

**L11**  $^{13}\text{C}$   $\{^1\text{H}\}$  NMR (100 MHz,  $\text{CDCl}_3$ )

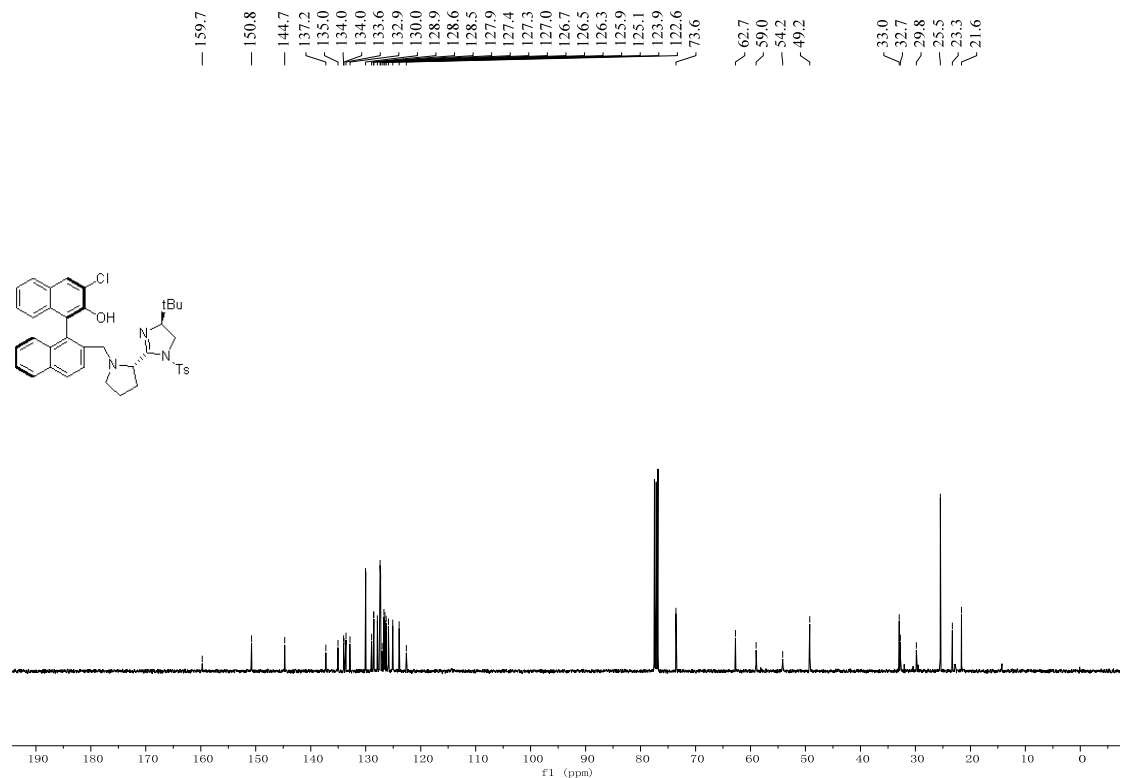



### L12 <sup>1</sup>H NMR (400 MHz, CDCl<sub>3</sub>)

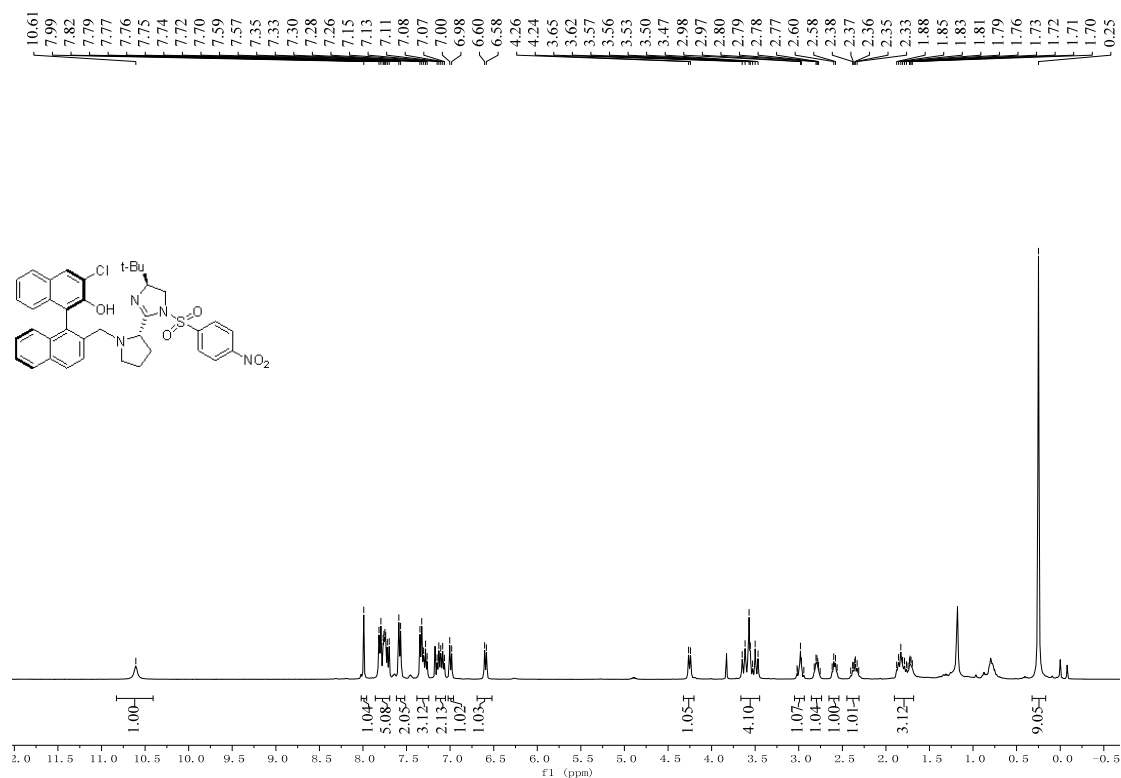

### L12 <sup>13</sup>C {<sup>1</sup>H} NMR (100 MHz, CDCl<sub>3</sub>)

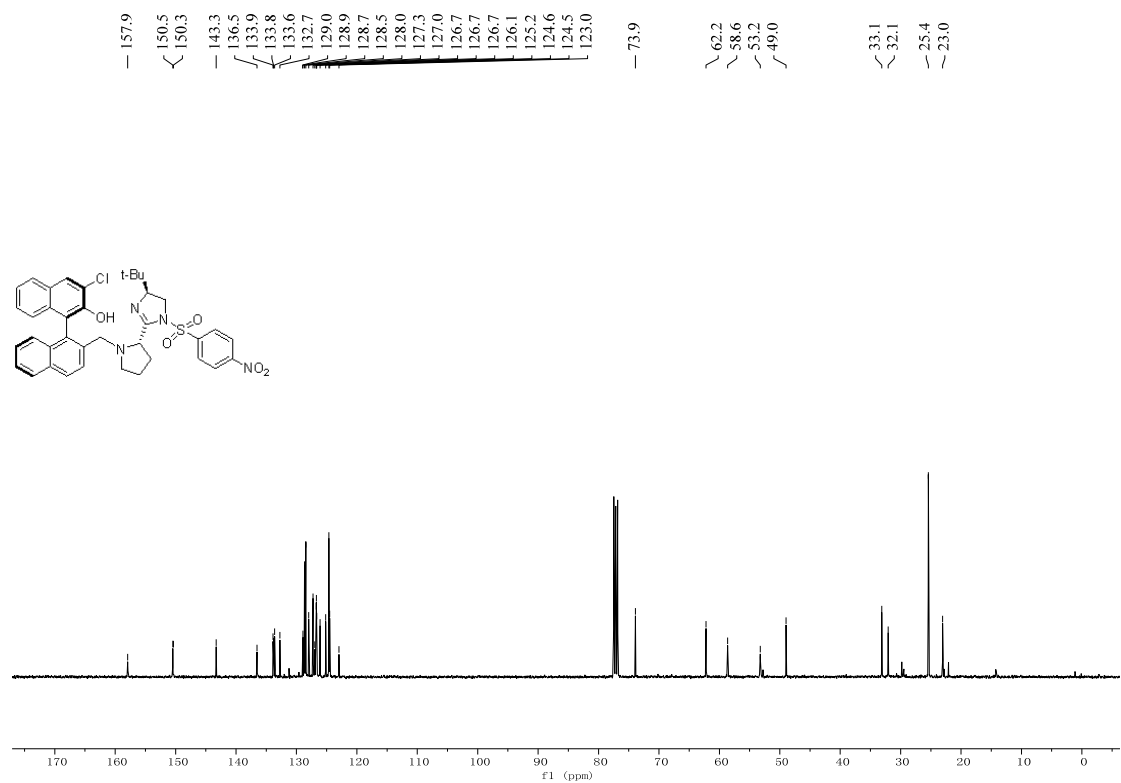



## 6. References

- (a) S. Yu, Q. Cai, T. Yu, J. Li, C. Yao and Y.-M. Li, "New Binaphthyl-Proline-Based Chiral Ligands Bearing Imidazoline Groups: Design, Synthesis, and Their Application in Enantioselective Conjugate Addition of 4-Hydroxycoumarin and Related Nucleophiles to  $\beta,\gamma$ -Unsaturated  $\alpha$ -Ketoesters" *J. Org. Chem.*, 2023, **88**, 14928-14944;

(b) Q. Cai, T. Yu, J. Li, Y. Zhao, J. Hou, L. Xue, S. Yu, C. Yao and Y.-M. Li, "Cu(II)-Catalyzed Enantioselective Aza-Friedel-Crafts Reaction of 1-Naphthols and Electron-Rich Phenols with Isatin-Derived Ketimines" *Chem. Eur. J.*, 2024, **30**, e202304118.
- (a) H. Wang, T. Jiang and M.-H. Xu, "Simple Branched Sulfur-Olefins as Chiral Ligands for Rh-Catalyzed Asymmetric Arylation of Cyclic Ketimines: Highly Enantioselective Construction of Tetrasubstituted Carbon Stereocenters" *J. Am. Chem. Soc.*, 2013, **135**, 971-974; (b) R.-R. Liu, D.-J. Wang, L. Wu, B. Xiang, G.-Q. Zhang, J.-R. Gao and Y.-X. Jia, "Nickel-Catalyzed Enantioselective Addition of Styrenes to Cyclic N-Sulfonyl  $\alpha$ -Ketiminoesters" *ACS Catal.*, 2015, **5**, 6524-6528; (c) B. Qiao, Y.-J. Huang, J. Nie and J.-A. Ma, "Highly Regio-, Diastereo-, and Enantioselective Mannich Reaction of Allylic Ketones and Cyclic Ketimines: Access to Chiral Benzosultam" *Org. Lett.*, 2015, **17**, 4608-4611; (d) L. Wu, R.-R. Liu, G. Zhang, D.-J. Wang, H. Wu, J. Gao and Y.-X. Jia, "Enantioselective Construction of Cyclic Indolyl  $\alpha$ -Amino Esters via a Friedel-Crafts Alkylation Reaction" *Adv. Synth. Catal.*, 2015, **357**, 709-713.
- M. J. Frisch, G. W. Trucks, H. B. Schlegel, G. E. Scuseria, M. A. Robb, J. R. Cheeseman, G. Scalmani, V. Barone, B. Mennucci, G. A. Petersson, H. Nakatsuji, M. Caricato, X. Li, H. P. Hratchian, A. F. Izmaylov, J. Bloino, G. Zheng, J. L. Sonnenberg, M. Hada, M. Ehara, K. Toyota, R. Fukuda, J. Hasegawa, M. Ishida, T. Nakajima, Y. Honda, O. Kitao, H. Nakai, T. Vreven, J. A. Montgomery Jr., J. E. Peralta, F. Ogliaro, M. J. Bearpark, J. J. Heyd, E. N. Brothers, K. N. Kudin, V. N. Staroverov, T. Keith, R. Kobayashi, J. Normand, K. Raghavachari, A. P. Rendell, J. C. Burant, S. S. Iyengar, J. Tomasi, M. Cossi, N. Rega, N. J. Millam, M. Klene, J. E. Knox, J. B. Cross, V. Bakken, C. Adamo, J. Jaramillo, R. Gomperts, R. E. Stratmann, O. Yazyev, A. J. Austin, R.

- Cammi, C. Pomelli, J. W. Ochterski, R. L. Martin, K. Morokuma, V. G. Zakrzewski, G. A. Voth, P. Salvador, J. J. Dannenberg, S. Dapprich, A. D. Daniels, Ö. Farkas, J. B. Foresman, J. V. Ortiz, J. Cioslowski and D. J. Fox. Gaussian 09, Revision D. 01. Gaussian, Inc., **2013**.
4. Y. Zhao and D. G. Truhlar, "A new local density functional for main-group thermochemistry, transition metal bonding, thermochemical kinetics, and noncovalent interactions" *J. Chem. Phys.*, 2006, **125**, 194101.
  5. (a) R. Ditchfield, W. J. Hehre and J. A. Pople, "Self-Consistent Molecular-Orbital Methods. IX. An Extended Gaussian-Type Basis for Molecular-Orbital Studies of Organic Molecules" *J. Chem. Phys.*, 1971, **54**, 724-728; (b) W. J. Hehre, R. Ditchfield and J. A. Pople, "Self-Consistent Molecular Orbital Methods. XII. Further Extensions of Gaussian-Type Basis Sets for Use in Molecular Orbital Studies of Organic Molecules" *J. Chem. Phys.*, 1972, **56**, 2257-2261; (c) P. C. Hariharan and J. A. Pople, "The influence of polarization functions on molecular orbital hydrogenation energies" *Theor. Chim. Acta*, 1973, **28**, 213-222; (d) M. M. Francl, W. J. Pietro, W. J. Hehre, J. S. Binkley, M. S. Gordon, D. J. DeFrees and J. A. Pople, "Self-consistent molecular orbital methods. XXIII. A polarization-type basis set for second-row elements" *J. Chem. Phys.*, 1982, **77**, 3654-3665; (e) M. S. Gordon, J. S. Binkley, J. A. Pople, W. J. Pietro and W. J. Hehre, "Self-consistent molecular-orbital methods. 22. Small split-valence basis sets for second-row elements" *J. Am. Chem. Soc.*, 1982, **104**, 2797-2803; (f) T. Clark, J. Chandrasekhar, G. W. Spitznagel and P. V. R. Schleyer, "Efficient diffuse function-augmented basis sets for anion calculations. III. The 3-21+G basis set for first-row elements, Li-F" *J. Comput. Chem.*, 1983, **4**, 294-301; (g) G. W. Spitznagel, T. Clark, P. v. R. Schleyer and W. J. Hehre, "An evaluation of the performance of diffuse function-augmented basis sets for second row elements, Na-Cl" *J. Comput. Chem.*, 1987, **8**, 1109-1116.
  6. M. Dolg, U. Wedig, H. Stoll and H. Preuss, "Energy-adjusted ab initio pseudopotentials for the first row transition elements" *J. Chem. Phys.*, 1987, **86**, 866-872.
  7. (a) R. Krishnan, J. S. Binkley, R. Seeger and J. A. Pople, "Self-consistent molecular orbital methods. XX. A basis set for correlated wave functions" *J. Chem. Phys.*, 1980,

- 72, 650-654; (b) A. D. McLean and G. S. Chandler, "Contracted Gaussian basis sets for molecular calculations. I. Second row atoms,  $Z=11-18$ " *J. Chem. Phys.*, 1980, **72**, 5639-5648.
8. (a) P. J. Hay and W. R. Wadt, "Ab initio effective core potentials for molecular calculations. Potentials for K to Au including the outermost core orbitals" *J. Chem. Phys.*, 1985, **82**, 299-310; (b) L. E. Roy, P. J. Hay and R. L. Martin, "Revised Basis Sets for the LANL Effective Core Potentials" *J. Chem. Theory Comput.*, 2008, **4**, 1029-1031.
9. A. V. Marenich, C. J. Cramer and D. G. Truhlar, "Universal Solvation Model Based on Solute Electron Density and on a Continuum Model of the Solvent Defined by the Bulk Dielectric Constant and Atomic Surface Tensions" *J. Phys. Chem. B*, 2009, **113**, 6378-6396.
10. M. B. Smith and J. March, *Chapter 11 in March's Advanced Organic Chemistry*, John Wiley & Sons, Inc., Hoboken, New Jersey, 2007.
